# Supplementary material for: Impact of the Tambora volcanic eruption of 1815 on islands and relevance to future sunlight-blocking catastrophes
Source: Sci Rep. 2023 Mar 4;13:3649. doi: 10.1038/s41598-023-30729-2 (PMC9985606; doi:10.1038/s41598-023-30729-2)
Supplement: Supplementary file 3 — Supplementary Information 2. [file 41598_2023_30729_MOESM3_ESM.xlsx]

## Sheet: Tambora_Islands_Anom_wr_1779_18
Year	Period-1	Period-Just2	Period-Justx1816vsRef	month	Cuba(Havana)_T2M	England(London)_T2M	Hispaniola(Port-au-Prince)_T2M	Iceland(Reykjavik)_T2M	Ireland(Dublin)_T2M	Newfoundland(StJohns)_T2M	Sicily(Palermo)_T2M	TierraFuego(Ushuaia)_T2M	Marajo(Breves)_T2M	Hainan(Haikou)_T2M	Honshu(Tokyo)_T2M	Hokkaido(Sapporo)_T2M	Kyushu(Fukuoka)_T2M	Luzon(QuezonCity)_T2M	Mindanao(DavaoCity)_T2M	Sakhalin(Yuzhno-Sakhalinsk)_T2M	Taiwan(Taipei)_T2M	VancouverIsland(Victoria)_T2M	Australia(Sydney)_T2M	Tasmania(Hobart)_T2M	Borneo(Samarinda)_T2M	Sulawesi(Makassar)_T2M	NewBritain(Kimbe)_T2M	NewGuinea(Jayapura)_T2M	NewZealandNorth(Auckland)_T2M	NewZealandSouth(Christchurch)_T2M	Sumatra(Medan)_T2M	Java(Jakarta)_T2M	Madagascar(Antananarivo)_T2M	SriLanka(Colombo)_T2M	Timor(Kupang)_T2M
1602				1	0.0748722	3.29384	-0.416394	-0.301787	2.08719	-0.571125	-1.1553	-0.162215	0.215808	-0.30351	-0.614413	-0.1355	-0.550671	-0.16497	-0.329511	0.103362	-0.473004	-0.48208	0.0926958	-0.0856592	-0.158379	-0.104238	-0.124606	-0.267037	0.180359	0.0311185	0.00898997	0.00499032	-0.370501	-0.00132694	-0.0278905
1602				2	0.0246543	5.68941	-0.362246	0.0201253	4.16462	-0.79179	-1.22169	0.0470757	0.0292334	-0.227016	-0.726855	-0.246514	-0.486588	-0.17394	-0.40578	0.114358	-0.28797	-0.32627	-0.255077	-0.347193	-0.182683	-0.148458	-0.126693	-0.268115	0.126046	-0.238997	0.0364939	-0.0720811	-0.556939	-0.00671679	-0.0532986
1602				3	-0.00511659	2.76198	-0.375798	-0.475394	1.32447	-0.336469	-0.0484053	0.213152	-0.16331	-0.153786	-1.25552	-0.616748	-0.633987	-0.156302	-0.535163	-0.199218	-0.227264	-1.07471	0.0193418	-0.0116053	-0.0965493	-0.252474	-0.166194	-0.376007	0.303327	0.0714277	-0.121119	-0.0963385	-0.591627	-0.00437819	-0.0938509
1602				4	-0.169778	-0.306813	-0.471609	-1.46243	-0.442806	-0.171662	0.162433	-0.124622	-0.20343	-0.127629	-0.441745	0.118176	-0.169825	-0.178571	-0.601587	0.19693	-0.275791	-1.31875	-0.157774	-0.162086	-0.194472	-0.306001	-0.107764	-0.349583	0.0887657	-0.0549296	-0.472995	-0.192775	-0.386132	-0.232749	-0.0643349
1602				5	-0.30977	-1.50864	-0.528356	-1.12802	-0.616673	-0.140378	-0.42643	0.39343	-0.0706607	-0.115171	-0.188476	0.116241	-0.0768368	-0.0397799	-0.577703	0.106796	-0.0357231	-1.74834	-0.179294	0.0242834	-0.341567	-0.279435	-0.0950517	-0.204819	0.117834	0.0207623	-0.232911	-0.0863833	-0.41161	-0.0877429	-0.0491538
1602				6	-0.25518	-0.694482	-0.467223	-0.184426	-0.367648	-0.284353	-0.482937	0.0557403	0.13211	-0.0962802	0.319845	0.614468	0.077063	-0.138988	-0.374663	0.631324	-0.292648	-0.627764	-0.0559237	0.178698	-0.402668	-0.259224	-0.107686	-0.19146	0.133128	-0.000943565	-0.256202	-0.118284	-0.402435	-0.197753	-0.106883
1602				7	-0.257322	-1.18433	-0.530448	-0.658536	-0.566057	-0.316711	-0.488078	0.0284861	0.0332355	-0.11069	0.346055	0.166393	-0.0204452	-0.139068	-0.445482	0.35389	-0.118787	-1.1538	-0.0467251	0.183472	-0.374937	-0.208069	-0.137135	-0.125188	0.115132	0.120525	-0.0563421	-0.0982733	-0.187138	0.0194266	-0.0540912
1602				8	-0.258619	-0.950049	-0.469149	-1.0059	-0.566326	-0.356182	-0.542654	0.0852882	-0.202652	0.00196857	0.104474	0.0819031	0.0253597	-0.0417729	-0.27152	0.110925	-0.0487693	-0.447816	-0.3143	0.0794031	-0.396082	-0.160389	-0.140433	-0.13126	-0.0138615	-0.132784	0.0813512	-0.0509573	-0.239842	-0.039137	-0.0648598
1602				9	-0.24989	-0.973941	-0.33712	-0.656701	-0.828611	-0.246469	-0.313062	-0.41248	-0.360713	-0.164944	0.249156	0.0618864	-0.0170663	-0.188458	-0.206452	-0.0912022	-0.158208	-0.329342	-0.294641	0.115323	-0.478579	-0.17176	-0.0880814	-0.0310332	0.0310679	-0.141848	0.191419	-0.0769206	-0.257523	0.0823064	-0.113903
1602				10	-0.317389	0.304165	-0.270246	-0.675966	0.0741911	-0.316683	-0.179104	-0.0888641	-0.294842	-0.106177	-0.0528748	-0.222864	0.278434	-0.107428	-0.221001	-0.32603	-0.139592	-0.329387	-0.327394	0.02633	-0.518661	-0.113967	-0.0881018	-0.0654601	0.0247173	-0.0752671	0.123818	0.0130793	-0.207363	0.0626684	-0.075447
1602				11	-0.192702	-0.125786	-0.437128	-0.850033	-0.155479	-0.472582	-0.35809	-0.435112	-0.329749	-0.188778	-0.103947	-0.273934	-0.214351	-0.127379	-0.301662	-0.154394	-0.260466	-0.201727	-0.198415	0.0206494	-0.704421	-0.200536	-0.139254	-0.160684	0.126942	-0.150435	-0.149206	0.111468	-0.287666	0.0499767	-0.0854986
1602				12	-0.288603	-1.84837	-0.526956	-0.492805	-0.949194	-0.26122	-0.868412	-0.337805	-0.0288004	-0.427551	-0.547763	-0.286551	-0.527273	-0.155635	-0.520845	-0.118687	-0.361913	-0.236172	-0.161185	0.475872	-0.767842	-0.368805	-0.212352	-0.575577	0.219318	0.201555	-0.456104	-0.013783	-0.578735	-0.116681	-0.0396729
1603				1	-0.148892	-2.83469	-0.378649	-0.837571	-1.89998	0.0686407	-0.403319	-0.16803	0.701625	-0.0688013	-0.209943	-0.217226	-0.0917583	-0.0933201	-0.36191	-0.418927	-0.0437276	0.19046	-0.12679	0.0329035	-0.242812	-0.133608	-0.160291	-0.396336	0.102318	0.192989	-0.188688	-0.00821807	-0.361613	0.024243	-0.0696595
1603				2	-0.301359	0.350828	-0.47163	-0.803045	0.172726	-0.0328183	-0.371476	-0.161659	0.379117	-0.0447379	-0.347542	-0.157253	-0.136188	-0.149104	-0.257092	0.017221	-0.102443	-0.137946	0.161686	-0.291568	0.0948176	-0.0741632	-0.222089	-0.285573	-0.01451	-0.467815	0.300929	0.0186153	-0.1262	0.144156	-0.0738045
1603				3	-0.180968	0.879826	-0.376898	-1.54721	0.111557	-0.110343	0.276385	-0.190091	0.145297	-0.106656	0.286604	-0.110362	0.27863	-0.0803628	-0.348251	-0.142199	-0.242456	-0.51487	-0.136513	-0.230464	-0.158283	-0.11353	-0.202048	-0.351206	0.210398	0.0538266	-0.0464658	0.0213678	-0.196961	-0.000273577	0.0432055
1603				4	-0.326678	0.65288	-0.328903	-0.801049	0.0593522	-0.122411	0.0110931	0.267889	0.14852	0.0397255	-0.306833	-0.221573	-0.221782	-0.179801	-0.566526	-0.102551	-0.199625	0.0945897	-0.333706	-0.126184	-0.334893	-0.211463	-0.227971	-0.41809	-0.0101685	-0.0574034	0.0216246	-0.0833239	-0.333095	-0.145515	-0.0681191
1603				5	-0.337197	0.0048282	-0.325494	-0.397105	-0.156939	-0.451407	-0.252321	0.448472	-0.0800696	-0.006239	-0.625552	-0.0444158	-0.230363	-0.158779	-0.33183	0.0199063	-0.0876907	0.412359	-0.0145281	0.0523367	-0.360652	-0.180438	-0.17199	-0.414887	0.107145	0.20319	-0.102387	-0.0827155	-0.264406	0.113765	-0.110853
1603				6	-0.225263	0.21533	-0.386187	-0.277912	-0.204406	-0.352609	-0.495056	-0.068183	0.334132	-0.119029	-0.428925	-0.0271223	-0.283176	-0.141204	-0.15668	0.11477	-0.22923	1.34227	-0.146777	0.0278735	-0.319703	-0.234456	-0.162397	-0.132164	0.0772286	0.00979767	-0.0193497	-0.0521486	-0.132211	-0.0938105	-0.0643152
1603				7	-0.321817	-0.964976	-0.473521	-1.26687	-0.642948	-0.328502	-0.460784	-0.318403	0.104835	-0.051844	-0.364524	-0.133648	-0.107523	-0.147003	-0.311867	-0.102761	-0.0547574	-0.743825	-0.134098	0.0417649	-0.132156	-0.198313	-0.206845	-0.155707	0.0497103	0.0819948	0.371047	-0.0588771	-0.154064	0.121063	-0.0894363
1603				8	-0.264432	-0.962614	-0.440996	-0.985136	-0.620527	-0.193363	-0.434939	-0.0329581	-0.0503501	-0.0994318	-0.217295	-0.0874905	-0.106102	-0.156729	-0.177962	0.050878	-0.116461	0.495898	-0.379425	-0.0503434	-0.152885	-0.176952	-0.172713	0.0180799	0.0678637	0.02857	0.523879	-0.000509834	-0.32457	0.117582	-0.16659
1603				9	-0.311047	-0.166128	-0.284557	-0.919733	-0.25011	-0.233355	-0.420685	-0.025023	-0.337806	-0.128639	-0.499333	-0.164798	-0.0463975	-0.0985669	-0.144931	-0.12422	-0.06285	-0.0141052	-0.165115	0.0285911	0.0127709	-0.124019	-0.135405	0.0195821	-0.0078887	-0.0279883	0.499547	-0.00855935	-0.116938	0.147107	-0.14353
1603				10	-0.28216	0.751486	-0.277685	-0.73305	0.197372	-0.352743	0.047561	-0.273036	-0.0354961	-0.159854	0.0563229	-0.215409	0.332277	-0.145195	-0.168783	-0.39625	0.036966	-0.871308	0.090437	0.205105	-0.515367	-0.0638474	-0.094337	-0.199945	0.054574	0.110884	0.341491	0.0203234	-0.126665	0.243619	-0.060417
1603				11	-0.182375	0.616998	-0.37199	-0.897288	0.13576	-0.539282	0.175212	-0.530702	-0.14487	-0.280247	-0.202315	-0.0431562	-0.257361	-0.105354	-0.212095	0.0742408	-0.35702	-0.845894	-0.230205	0.0420708	-0.526147	-0.281467	-0.193453	-0.216633	0.072547	-0.135823	-0.114599	-3.56038e-06	-0.221311	-0.278337	-0.12858
1603				12	-0.239519	1.25183	-0.454386	-0.988588	0.487803	-0.241583	0.0930273	-0.354473	-0.209815	-0.368801	-0.24201	-0.230623	-0.254909	-0.119782	-0.244348	-0.157687	-0.293763	-0.125091	-0.24108	-0.0460728	-0.484214	-0.208609	-0.205267	-0.268656	0.133128	0.0943012	-0.35132	0.010015	-0.475599	-0.412561	-0.0402451
1604				1	-0.106772	1.23686	-0.295291	-1.06282	0.372663	0.0957005	0.322077	-0.65085	0.0809873	-0.430414	-0.858545	-0.136979	-0.665592	-0.104722	-0.389581	0.029985	-0.442254	-0.602975	-0.0171808	-0.188743	-0.191443	0.0212594	-0.0517586	-0.179412	0.236193	0.233551	-0.392753	0.174105	-0.326623	-0.134092	-0.0113366
1604				2	-0.264795	-0.41491	-0.377007	-0.845599	-0.533947	0.0254216	0.0174443	0.00771902	0.47334	-0.117583	-0.516184	-0.283494	-0.243255	-0.112621	-0.507489	-0.0239777	-0.305826	-0.56397	-0.000701586	-0.359381	-0.339167	0.0358259	-0.217181	-0.308007	0.0198318	-0.378511	-0.436714	0.156919	-0.364638	-0.0227843	-0.0136716
1604				3	-0.265903	0.176467	-0.323849	-0.819864	-0.199068	0.0239541	-0.0672661	0.0473491	0.824443	0.0648951	0.745864	0.162428	0.834703	-0.168812	-0.262878	-0.121217	0.0687276	-0.106288	-0.172902	0.0849819	-0.30434	-0.0789302	-0.155346	-0.3792	-0.0666295	-0.221235	-0.285066	0.0364359	-0.14703	0.177796	-0.0166948
1604				4	-0.43506	-0.538562	-0.323074	-0.628327	-0.377973	0.0056087	-0.288792	-0.17892	1.02328	0.102935	-0.304688	-0.261271	-0.0331035	-0.292579	-0.274168	-0.288015	-0.0207137	0.173934	-0.214113	-0.0430579	-0.565804	-0.153499	-0.118596	-0.31219	-0.0840572	-0.285318	-0.270154	-0.0506681	-0.0736628	0.0811029	-0.107548
1604				5	-0.347798	-0.155687	-0.283842	-0.502042	-0.281398	-0.423136	-0.333172	0.0517341	0.576991	0.0441951	-0.491199	-0.223138	-0.286487	-0.111565	-0.202663	-0.327594	-0.0352882	-0.145049	-0.0810507	-0.0191737	-0.386584	-0.224675	-0.0797414	-0.16766	-0.136846	-0.19696	-0.212132	-0.159357	-0.164005	-0.0222141	-0.0991321
1604				6	-0.271909	-0.560045	-0.352889	-0.939604	-0.48228	-0.407897	-0.414131	-0.153284	0.663249	-0.0135317	-0.110575	0.00127811	-0.163261	-0.159097	0.0671895	-0.208365	-0.110416	0.217218	-0.114999	-0.101933	-0.181979	-0.152918	-0.108413	0.10648	-0.0832614	-0.00386562	-0.219541	-0.0582654	-0.131958	-0.030229	-0.0592894
1604				7	-0.298908	-0.0907671	-0.393392	-0.365503	-0.268235	-0.236608	-0.431289	-0.0506173	0.870556	0.00255356	-0.795628	-0.633364	-0.378233	-0.162605	0.0278207	-0.340778	-0.107932	-0.718287	0.106811	0.15472	-0.14933	-0.0640335	-0.197794	0.192062	0.13304	0.188657	-0.0280713	0.0171117	-0.161129	0.0560782	-0.0325687
1604				8	-0.197189	-0.552637	-0.312683	-1.40619	-0.363369	-0.572006	-0.376509	0.267863	0.480971	-0.0985315	-0.595515	-0.486952	-0.185915	-0.19496	-0.0558443	-0.473508	-0.0623782	0.332175	-0.0589722	0.222762	-0.0624119	-0.139727	-0.137673	0.206225	0.0902245	0.2444	0.0833616	-0.0510107	-0.111367	0.0779666	-0.0460094
1604				9	-0.227269	-0.471845	-0.344231	-1.19374	-0.406234	-0.607457	-0.516918	0.0234251	-0.1963	-0.135551	-0.597188	-0.1284	-0.329261	-0.206456	-0.0652303	-0.144877	-0.132867	0.241601	-0.249143	-0.0404463	0.0561574	-0.106122	-0.174269	0.0897077	0.10553	0.146753	0.181543	-0.0283958	-0.0125282	0.0701757	-0.0958138
1604				10	-0.188988	0.287617	-0.227804	-0.724122	0.15467	-0.396267	-0.223633	0.364765	-0.236401	-0.388648	-0.0228836	-0.142088	0.063951	-0.159248	-0.108566	-0.148408	-0.116778	-0.499116	-0.210728	-0.0132389	-0.375421	-0.138984	-0.0972132	0.108011	-0.0431862	-0.0932209	0.142144	0.0146186	-0.0318924	0.170338	-0.0901679
1604				11	-0.146189	-1.56882	-0.364197	-1.13524	-1.70966	-0.236013	0.313041	-0.442301	-0.115191	-0.197416	-0.184171	0.121975	-0.14664	-0.0934813	-0.10087	0.237181	-0.218587	-0.477991	-0.0415894	0.0397286	-0.39038	-0.00952295	-0.165482	0.159617	-0.015026	-0.162071	-0.0349446	0.0278304	-0.198067	0.129862	-0.0360658
1604				12	-0.279669	-0.963882	-0.39193	-0.563782	-0.698368	-0.1277	-0.53071	-0.075288	0.570338	-0.260965	-0.0491727	0.198121	-0.140004	-0.142194	-0.102943	0.107201	-0.263648	0.252531	0.0392408	0.0612079	-0.298987	-0.109263	-0.143917	0.0714322	0.0509694	-0.104477	-0.376755	0.105289	-0.109816	-0.151716	-0.125389
1605				1	-0.170876	0.512923	-0.334372	-0.82572	0.121606	-0.291859	-0.53195	-0.216861	0.785278	-0.171632	-0.385523	-0.0497867	-0.0364828	-0.206895	-0.159544	-0.0271115	-0.281005	-0.50433	0.351115	-0.250676	-0.39922	-0.138002	-0.124432	-0.0341555	0.0195104	0.108948	-0.390445	-0.013036	0.205348	-0.182367	-0.117957
1605				2	-0.297922	0.898187	-0.243805	-1.03859	-0.0881963	-0.226815	0.299801	-0.112922	1.39212	0.0774811	-0.229623	-0.0144088	-0.140744	-0.163713	-0.0221946	0.211725	0.0707216	0.491774	-0.0226838	-0.439922	-0.224833	0.068968	-0.109078	-0.152871	-0.123959	-0.443821	-0.0636915	0.096294	-0.0358264	0.084588	0.043671
1605				3	-0.232515	0.499328	-0.350895	-1.31045	-0.238759	0.200941	0.355412	-0.0605816	1.20012	0.131721	-0.673578	-0.425462	-0.289955	-0.200076	0.00997429	-0.26127	0.00350774	0.0423053	0.0726369	0.0614834	-0.237529	-0.0601371	-0.185256	-0.192248	-0.200016	-0.18825	0.00306613	0.0327032	0.00605946	0.10185	-0.0922316
1605				4	-0.245204	-1.411	-0.416967	-1.26863	-0.71176	0.144501	-0.198008	-0.358603	0.583382	0.0988876	-0.667831	-0.262532	-0.277424	-0.192485	0.193554	-0.199819	-0.00356471	0.0107665	0.0997452	0.0756631	-0.298857	-0.117635	-0.196235	-0.308707	-0.0757774	-0.0382775	0.0345888	-0.133102	-0.187537	0.0762048	-0.00921065
1605				5	-0.282443	-0.97542	-0.274026	-0.526171	-0.50789	-0.53118	-0.432715	-0.153699	0.133159	0.0521831	-0.352908	-0.067366	-0.208362	-0.118859	0.200307	-0.0274813	-0.167921	-0.675291	-0.15922	-0.163495	-0.144448	-0.148829	-0.139033	-0.0862924	-0.087787	-0.111884	-0.207475	-0.0830378	-0.283428	-0.00298608	-0.144054
1605				6	-0.162859	-1.07249	-0.231905	-0.840261	-0.602645	-0.30585	-0.441894	-0.450592	0.496529	0.0340032	-0.259816	0.0592005	-0.173463	-0.0901004	0.254499	-0.0192087	-0.105033	-0.133811	0.00231339	0.169305	-0.0458607	-0.0498662	-0.100724	0.0659655	-0.0300359	-0.115011	-0.135351	-0.0107953	-0.0491278	-0.0796465	-0.0935263
1605				7	-0.147737	-0.784729	-0.300681	-0.918761	-0.432101	-0.422399	-0.470798	-0.196634	0.899343	0.107378	-0.406754	-0.396714	-0.26643	-0.118284	0.0923807	-0.470109	-0.0138601	-1.07774	-0.072131	0.0385901	0.0378306	0.0116997	-0.187838	0.280803	-0.159045	-0.268414	0.0828162	0.028943	-0.0757621	0.0789035	-0.0055034
1605				8	-0.290866	-0.379673	-0.365004	-1.08372	-0.219911	-0.70672	-0.474812	-0.0657094	0.386217	0.012911	-0.192076	-0.179907	-0.0761341	-0.104302	0.0277948	-0.00712347	-0.0868457	-0.675979	-0.194462	0.0454284	-0.0725686	-0.00345427	-0.19605	0.274018	-0.192445	-0.276415	0.329451	0.0435423	-0.153107	0.128681	-0.0822281
1605				9	-0.32975	-0.263151	-0.195086	-0.625505	-0.339423	-0.215255	-0.394596	0.350888	-0.121398	-0.0808448	-0.428092	-0.166688	-0.0638212	-0.135957	0.0102359	-0.216514	-0.0300074	0.422845	-0.0991299	0.136217	0.087682	0.102113	-0.181225	0.346774	-0.141891	-0.108339	0.441396	0.0976552	0.0974056	0.21472	-0.0387803
1605				10	-0.196604	0.147496	-0.231759	-0.490961	-0.0103759	-0.234244	-0.196799	0.0831611	-0.133969	-0.158274	-0.107703	-0.237675	0.101114	0.018158	-0.00720399	-0.309134	-0.0131687	-0.833004	-0.0404872	-0.270984	-0.183447	0.0170375	-0.170898	0.230478	-0.074811	-0.115883	0.410922	0.0317218	-0.150739	0.341467	-0.0309981
1605				11	-0.219826	1.41122	-0.371218	-1.10093	0.769386	-0.383564	-0.403145	-0.29722	0.168725	-0.180983	-0.0764207	-0.178715	-0.0116905	-0.13752	-0.229276	-0.103636	-0.101208	-0.248561	0.00814088	0.02879	-0.328782	-0.0242172	-0.308689	-0.31394	-0.0755872	-0.0494438	0.0680217	0.14201	-0.142765	0.0890144	-0.0267579
1605				12	-0.213806	2.59715	-0.359915	-0.926102	1.31185	-0.309089	-0.333213	0.196256	0.361415	-0.0849248	-0.162724	0.103445	-0.182181	-0.0622947	-0.264347	0.154623	-0.223769	0.0208546	0.148488	0.169007	-0.343892	-0.247894	-0.271925	-0.236938	-0.00261186	0.0380573	-0.188385	0.0192599	-0.0936529	-0.186851	-0.0645027
1606				1	-0.0856903	-0.54439	-0.240668	-1.15051	-0.614797	-0.409625	-0.0777036	-0.161389	0.746272	0.0110746	-0.0855986	-0.342691	0.0257182	-0.0498764	-0.0941008	-0.407134	-0.0935695	-0.0608625	-0.0901598	-0.624275	-0.322188	-0.155647	-0.215249	-0.168732	0.122461	-0.0173396	-0.256181	0.024657	-0.0631245	-0.157051	-0.0308316
1606				2	-0.24824	-0.272585	-0.38006	-1.35123	-0.313362	0.0802836	-0.233666	0.243229	0.584585	0.00264441	-0.166475	0.0490125	-0.168153	-0.0958455	-0.144751	0.428994	-0.194562	-0.393916	-0.201027	-0.573323	-0.280879	-0.0387381	-0.167193	-0.105475	-0.146848	-0.450544	-0.3054	0.0124545	0.0750612	-0.192142	0.105265
1606				3	-0.235147	1.45179	-0.251091	-0.919341	0.737609	-0.0623894	-0.319306	0.156165	0.674245	0.131708	-0.814445	-0.373779	-0.31843	-0.0781293	-0.245498	-0.095996	-0.305649	-0.062957	-0.105065	-0.0453644	-0.349527	0.0613686	-0.21391	-0.314005	-0.01779	-0.231444	-0.333548	0.140922	-0.0490686	-0.0183343	0.0686686
1606				4	-0.187219	-0.920201	-0.441065	-1.05528	-0.635486	-0.104229	-0.207947	0.0389987	0.635106	0.279355	-0.359785	-0.331447	-0.189292	-0.0543072	-0.21841	-0.302864	-0.0683745	-0.256493	-0.186609	-0.0495658	-0.542391	-0.152099	-0.219131	-0.470107	-0.0992874	-0.224772	-0.096673	-0.128503	-0.155528	-0.0223384	-0.0440465
1606				5	-0.216807	-0.698848	-0.287387	-0.943887	-0.391076	-0.371796	-0.335486	-0.41817	0.420756	0.178205	-0.495764	-0.0262492	-0.206216	-0.068352	-0.225993	-0.084275	0.0124222	-0.672921	-0.13287	-0.0193014	-0.595195	-0.283696	-0.216851	-0.521719	-0.0806602	-0.224308	-0.142638	-0.136367	-0.199829	-0.0455047	-0.115137
1606				6	-0.182398	-0.665522	-0.298596	-0.445075	-0.352087	-0.191611	-0.491316	-0.0704611	0.805316	0.0447358	-0.817809	-0.445564	-0.388767	-0.0671092	-0.0903212	-0.388117	0.0336958	-1.05004	-0.045603	0.063046	-0.444832	-0.117764	-0.124305	-0.23737	-0.0207776	-0.107069	-0.164716	0.00866534	-0.216521	-0.176111	-0.0346636
1606				7	-0.245014	-1.56051	-0.335305	-0.723974	-0.615624	-0.206275	-0.523418	-0.307115	0.833738	0.0718132	-0.288628	-0.262705	-0.132635	0.0123524	-0.0893153	-0.197655	0.0635878	-1.02492	-0.192212	0.00689856	0.00520541	0.0104179	-0.131236	0.221545	-0.162398	-0.121958	-0.0287599	0.103455	0.0237643	-0.056051	-0.0543277
1606				8	-0.269691	-0.570362	-0.297378	-1.53094	-0.418403	-0.623845	-0.465426	-0.0506963	0.620844	0.128824	-0.0666092	-0.105942	-0.00814476	0.0729293	0.0199995	0.00943804	-0.0246413	-1.69004	-0.222756	0.0661375	0.0538047	0.0454692	-0.174903	0.340658	-0.0761612	-0.253969	0.073348	0.0987562	0.0379507	-0.102076	-0.0117973
1606				9	-0.413241	-0.746831	-0.315416	-0.97579	-0.486411	-0.455177	-0.38075	0.381045	-0.112483	-0.0640754	-0.16256	-0.234428	-0.0326475	-0.0264978	0.0100527	-0.307628	-0.0787611	-0.54354	-0.0716174	0.0755386	0.0675175	0.00923805	-0.161728	0.380996	0.147313	0.195937	0.244453	0.0760182	0.166518	-0.0891871	0.0503158
1606				10	-0.178446	-0.0643282	-0.249996	-0.831599	-0.182284	-0.332111	-0.523625	0.151202	-0.222508	-0.241133	0.121026	-0.195819	0.145113	-0.10051	-0.109224	-0.0475262	-0.0920451	-0.686254	-0.0428886	-0.0956421	-0.128511	-0.123372	-0.0760874	0.290575	0.0347185	0.021488	0.155252	0.0368678	0.0618671	0.00610021	0.00571836
1606				11	-0.178007	0.130395	-0.371883	-0.903617	-0.00865156	-0.366277	-0.348366	-0.0272	0.194791	-0.159838	-0.0243119	-0.0533672	-0.117646	-0.0700228	-0.200261	0.103132	-0.202065	-0.188887	0.0159362	0.183724	-0.264781	-0.111814	-0.154745	-0.0331706	0.0362368	-0.0467163	-0.0787831	0.104246	-0.52573	-0.101818	0.0514796
1606				12	-0.366182	-1.30828	-0.371864	-0.842338	-1.34735	-0.111283	1.04291	-0.266704	0.532893	-0.0719071	-0.518028	-0.46492	-0.524623	-0.0342815	-0.247875	-0.45146	-0.244939	0.387496	0.297349	0.0832387	-0.119483	-0.0571805	-0.220995	-0.0567378	-0.00536226	-0.0743275	-0.126734	0.219846	-0.144985	-0.0437044	-0.0109043
1607				1	-0.121707	2.5217	-0.299281	-1.30809	0.424848	-0.0510645	1.19192	-0.411704	0.819503	-0.189144	-0.281856	-0.177021	-0.339925	-0.0195953	-0.23156	0.150668	-0.338578	-0.508404	0.291813	-0.944655	0.019971	0.0409108	-0.246314	-0.173209	0.0610257	-0.116133	-0.439012	0.182488	-0.322732	-0.364711	-0.0120995
1607				2	0.09667	2.64435	-0.190845	-1.0465	0.821983	-0.150258	1.27403	0.141812	0.667537	-0.139123	-0.219969	-0.243521	-0.254229	-0.0213101	-0.220742	0.00306945	-0.246604	-0.164334	-0.0753628	-1.07614	-0.094275	-0.0634268	-0.286681	-0.221387	0.0863316	-0.172011	-0.26904	0.100967	-0.167119	-0.19575	0.0100215
1607				3	-0.0843345	0.82825	-0.296894	-1.49275	0.205105	-0.311018	-0.0369068	0.00339616	0.558642	0.0636	-1.51522	-0.710127	-0.793692	-0.00664571	-0.485242	-0.321626	-0.177927	-0.670926	0.0727437	0.269481	-0.0855897	0.0172631	-0.145255	-0.306929	0.0697135	-0.0233399	-0.223687	0.0861471	-0.179472	-0.224162	0.136139
1607				4	-0.133128	-0.618611	-0.329439	-1.03604	-0.279551	-0.139552	-0.413954	-0.0805165	0.751641	0.266175	-0.5341	-0.258721	-0.324111	-0.097112	-0.434757	-0.197064	-0.121641	0.206175	0.0866474	0.0408788	-0.251488	-0.130147	-0.204168	-0.33017	-0.0436806	-0.0169753	-0.24159	-0.00285091	-0.195558	-0.0556826	-0.0517617
1607				5	-0.216401	-0.0690463	-0.251743	-0.363403	-0.181622	-0.250647	-0.500788	0.352069	0.447484	0.0944442	-0.245374	0.00874488	-0.184793	-0.0928309	-0.229675	-0.0251672	-0.132784	1.4477	0.127838	0.145137	-0.44115	-0.183701	-0.12663	-0.305822	0.0334832	0.0611838	-0.0741643	-0.0476069	-0.199221	-0.0981666	-0.0349422
1607				6	-0.241289	-0.914481	-0.304041	-0.741524	-0.406844	-0.410002	-0.366346	0.138204	0.62501	0.0863675	-0.00280425	0.235299	-0.114408	-0.053054	0.0293878	0.485562	-0.088283	0.230658	0.266852	0.170511	-0.390725	-0.0830179	-0.202304	-0.0639745	0.0805303	-0.0636467	-0.060474	0.0677092	-0.148892	-0.0244001	0.0589319
1607				7	-0.209612	-0.715725	-0.345983	-0.396749	-0.287235	-0.361969	-0.463372	-0.387459	0.903219	0.0438019	0.179006	0.133869	0.0607526	0.0534711	-0.0501765	0.183997	-0.0203546	-0.815343	-0.0655506	-0.0210956	-0.0304487	-0.0458641	-0.160681	0.257533	-0.0282841	-0.133839	0.205678	0.101376	0.0733411	0.129677	-0.0215537
1607				8	-0.215631	0.0872094	-0.247681	-0.954884	-0.0974038	-0.206935	-0.379387	-0.152493	0.468134	0.0729315	0.0743744	0.113964	0.0676819	-0.0661889	-0.0239172	0.281275	0.0205705	-0.348682	0.092621	0.149952	-0.0592133	0.0250186	-0.182897	0.255421	-0.0630739	0.0617297	0.371156	0.209106	-0.00112422	0.161848	0.0576302
1607				9	-0.312527	0.10918	-0.198256	-1.02659	-0.173905	-0.213837	-0.384056	-0.221479	-0.131851	-0.00613588	-0.177752	-0.247735	0.0743395	0.0709906	0.0158187	-0.223601	0.0533915	-0.0159544	-0.0346463	-0.048399	-0.0865428	-0.149619	-0.247007	0.0614141	-0.0658044	-0.248548	0.515125	-0.0590564	-0.177501	0.337632	-0.184412
1607				10	-0.247666	-0.0795097	-0.337032	-0.851678	0.0088158	-0.165387	-0.361806	-0.0800932	-0.319683	-0.225445	0.154659	-0.158033	0.157774	-0.0269604	-0.125065	-0.207076	-0.030186	-0.429711	-0.112717	-0.102056	-0.132799	-0.105044	-0.150955	0.0231896	-0.0160513	-0.203593	0.325202	0.115405	0.0213264	0.347846	0.0112459
1607				11	-0.212118	0.419599	-0.311155	-1.17721	0.308976	-0.371788	-0.507529	-0.23343	0.358466	-0.186751	-0.269944	-0.39054	0.178977	-0.0775434	-0.153181	-0.435313	0.102683	-0.266339	0.013676	-0.00976137	-0.254851	-0.0724712	-0.155051	-0.064289	-0.0494775	-0.0963627	0.430151	0.113316	-0.522915	0.297829	0.1001
1607				12	-0.159591	1.60569	-0.349605	-1.01028	1.3254	-0.456773	-1.32937	-0.28195	0.679194	-0.204609	-0.324963	-0.164485	-0.174734	-0.0413253	-0.117994	-0.110141	-0.260077	-0.162616	0.346002	0.00343145	-0.313529	-0.168787	-0.182125	-0.138292	0.113076	0.125302	0.352457	0.0328364	-0.231615	0.152381	0.0114155
1608				1	-0.105454	-4.90647	-0.267049	-0.724955	-2.47971	0.0352006	-0.830881	-0.684159	0.192018	-0.190404	-0.581688	-0.554369	-0.468499	0.0445011	-0.190605	-0.268255	-0.420198	-0.311612	0.313948	0.113685	-0.153727	-0.110973	-0.251525	-0.152341	0.100868	-0.173018	0.346871	0.110314	-0.184155	0.00633869	-0.00273062
1608				2	-0.254833	-3.7493	-0.363581	-0.437871	-1.95088	0.0408692	-0.497464	0.0118599	0.137876	0.0394639	-0.424153	0.0623711	-0.404765	-0.0733712	-0.307559	0.759513	-0.291171	-0.11539	-0.385551	-0.631035	0.103416	0.01635	-0.0962648	-0.144406	-0.0122726	-0.514389	0.396311	0.187137	0.011268	0.0700025	0.0277141
1608				3	-0.180389	-0.697483	-0.395962	-1.13768	-0.513028	0.0627975	-0.0855366	0.0490919	0.168496	0.101428	-0.860521	-0.469564	-0.35162	-0.000771077	-0.451074	-0.105563	-0.0518092	0.198318	-0.0123774	0.00162697	0.0155952	-0.0468753	-0.148799	-0.176815	-0.0184175	-0.0662209	-0.159913	0.094858	-0.0954515	0.087125	0.0496618
1608				4	-0.303172	0.06901	-0.360042	-0.725616	-0.00114225	-0.122007	-0.484656	-0.0914392	0.368847	0.133584	-0.910812	-0.266397	-0.379632	-0.0690911	-0.429136	-0.0166474	-0.146911	1.54185	-0.140691	0.0560794	-0.321433	-0.191379	-0.240102	-0.385056	0.0926434	-0.0147771	-0.163604	-0.11469	-0.195586	0.00367788	0.0386199
1608				5	-0.250171	-0.539037	-0.265901	-0.543345	-0.343256	-0.426924	-0.344082	-0.312338	0.241067	0.231085	-0.653028	-0.288284	-0.28425	-0.087704	-0.215066	-0.315451	0.019508	-0.0545836	0.0603334	0.0975828	-0.568284	-0.181195	-0.164487	-0.242186	-0.0624021	-0.133666	0.114009	-0.00956103	-0.324276	0.0956868	0.00560042
1608				6	-0.299905	-1.66068	-0.32363	-0.710336	-0.559133	-0.498738	-0.605749	-0.362215	0.704181	0.0773763	-0.626143	-0.2835	-0.318992	0.000277392	-0.115311	-0.235484	-0.0728411	-0.16776	-0.0451367	0.104233	-0.175297	-0.0706106	-0.164951	-0.108669	0.0174123	-0.161222	0.11818	0.111517	-0.0328428	0.120991	-0.00717297
1608				7	-0.204283	-1.92459	-0.320474	-0.925029	-0.735248	-0.36301	-0.646875	0.108644	0.860815	0.130039	-0.462392	-0.456438	-0.163758	-0.0458923	-0.0777281	-0.529299	0.0661189	0.492419	-0.0498207	0.0878655	-0.0819757	-0.0485497	-0.148295	0.0901845	0.0539722	0.0663593	0.251895	0.149384	0.159636	0.251744	0.0176366
1608				8	-0.29417	-1.66958	-0.379021	-1.23847	-0.799374	-0.379824	-0.484097	-0.102841	0.531531	0.0234262	-0.602486	-0.249955	-0.26343	-0.0713463	0.00775051	-0.1726	-0.034035	0.447568	-0.0635527	0.0674335	0.0240711	-0.0247937	-0.179893	0.0836031	0.114503	0.193895	0.300721	0.0906176	0.0623752	0.286249	-0.0465988
1608				9	-0.325568	-0.998825	-0.283888	-1.49157	-0.442964	-0.367908	-0.549366	0.097512	-0.0711016	0.0574876	-0.787389	-0.364868	-0.0974725	0.0606223	-0.033677	-0.204116	0.0251398	-0.0988478	-0.0370381	0.110555	-0.279166	-0.0541183	-0.137768	0.0857747	0.0471869	-0.0209282	0.363441	0.146926	0.0809166	0.136887	-0.0445824
1608				10	-0.285017	-0.148485	-0.287496	-1.04093	-0.141962	-0.388149	-0.504985	0.132169	-0.327145	-0.257006	-0.0657904	-0.084071	0.155534	0.0410862	-0.0375614	-0.257778	0.095041	-0.341352	0.0116597	0.0928049	0.0233079	0.0196105	-0.0613742	0.275297	0.0703068	0.0523098	0.325002	0.17187	-0.0653645	0.243781	-0.0770968
1608				11	-0.355105	1.32073	-0.384749	-0.82288	0.754442	-0.425666	-0.420664	-0.132731	-0.170657	-0.342674	0.163082	0.0741238	0.0698077	-0.107662	-0.0236467	-0.00309518	-0.210789	-0.340388	-0.271162	0.165368	-0.159358	-0.0150333	-0.236647	-0.127483	-0.0574855	-0.0765739	0.0139274	0.139658	-0.480964	-0.0836063	-0.0397603
1608				12	-0.217285	1.85386	-0.375589	-1.11026	0.560752	-0.0863513	0.453758	0.094436	-0.00457134	-0.225615	-0.0865376	0.139204	0.00760345	-0.0969531	-0.157136	0.336436	-0.194764	-1.21877	0.00835317	-0.104607	-0.245532	-0.153624	-0.202247	-0.0561999	0.0300515	-0.0543709	-0.0197179	0.136791	-0.323403	-0.179477	0.00774193
1609				1	-0.208897	3.03686	-0.382186	-1.31935	0.843499	-0.139974	0.930844	0.0671808	0.606223	-0.087932	-0.199033	-0.26593	0.0312233	-0.0284588	-0.0704	-0.38666	-0.0223348	-1.07134	-0.0467791	-0.206803	-0.286876	-0.138075	-0.210938	-0.173565	0.0860578	0.0309602	0.0500037	0.0563857	-0.171412	-0.283412	-0.00375678
1609				2	-0.0229799	1.48108	-0.312441	-1.51532	0.44963	-0.180071	0.0623843	0.0939951	0.554195	-0.0277149	-0.167446	0.173394	-0.127475	-0.0734532	-0.135218	0.124725	-0.219864	-0.594907	0.235535	0.007623	-0.456595	-0.14135	-0.162021	-0.228625	0.0630295	-0.0495186	0.00756512	0.0651679	0.178802	0.0492315	0.00306352
1609				3	-0.4055	1.77891	-0.358868	-1.20341	1.06724	0.0318925	-0.484576	-0.248303	0.519814	0.184957	-1.2276	-0.457317	-0.510554	-0.0628248	-0.0817139	-0.258294	-0.158506	0.602665	-0.0899245	-0.0198565	-0.41608	0.0238682	-0.109196	-0.304154	-0.0225183	-0.181041	-0.340438	0.223512	0.0622023	0.107457	0.0199587
1609				4	-0.0671359	-0.021467	-0.238109	-0.249272	-0.0433562	-0.18998	-0.394893	0.18106	0.499407	0.196916	-0.811451	-0.344422	-0.202925	-0.144038	0.190136	-0.281269	-0.0587577	-1.02979	0.0804771	0.162542	-0.526158	-0.109166	-0.162671	-0.257506	0.0978848	-0.0306729	-0.128993	-0.00330868	0.0208749	-0.00905177	-0.0720177
1609				5	-0.381286	-0.24209	-0.268487	-0.414864	-0.275933	-0.351404	-0.338934	0.144803	0.414018	0.114714	-0.230082	-0.311807	-0.223752	-0.00493075	0.291211	-0.401327	-0.102469	0.445527	0.0215951	0.0209064	-0.535958	-0.0378747	-0.23531	-0.1803	0.0507943	0.021921	-0.0847959	0.00645688	-0.0736141	0.0303029	0.00522086
1609				6	-0.33538	-1.08864	-0.34091	-0.420158	-0.389833	-0.286353	-0.579161	0.31921	0.587714	-0.00411517	-0.0517735	-0.179776	-0.0896469	-0.014825	0.290328	-0.243456	-0.136768	0.17086	0.0527427	-0.0463261	-0.229773	0.082437	-0.168323	0.00695407	0.0231372	-0.101177	-0.105058	0.0797713	-0.0304539	-0.103145	0.0134626
1609				7	-0.299791	-0.738815	-0.330903	-0.41614	-0.298008	-0.271812	-0.656556	-0.0364741	0.743141	0.12614	-0.308705	-0.524456	-0.0893119	0.054646	0.174893	-0.364797	0.0226847	-0.548854	0.16295	0.222704	0.0212577	0.0776711	-0.174639	0.184528	0.109355	0.0303304	0.106601	0.160771	-0.024834	0.159611	0.0953458
1609				8	-0.326923	-0.565741	-0.423559	-0.837787	-0.383917	-0.153384	-0.466179	-0.00765893	0.288141	-0.0310057	-0.20346	-0.128914	0.063829	-0.0900899	0.199582	-0.146311	0.000556691	-0.135955	-0.14556	-0.0984228	-0.0535046	0.0935687	-0.188951	-0.0513609	0.0186121	-0.169811	0.364823	0.165088	0.0715	0.19095	0.0291744
1609				9	-0.257397	-0.286778	-0.323027	-1.06369	-0.188078	-0.366269	-0.500471	0.234071	-0.204505	0.0113526	-0.481408	-0.0853571	0.0181319	-0.0203084	-0.0128736	-0.108236	-0.0187635	0.242661	0.169925	0.174423	-0.315407	0.0872715	-0.113333	0.119804	0.160132	-0.0221451	0.421634	0.192813	0.0569012	0.222504	0.0180282
1609				10	-0.36925	-0.367853	-0.285585	-1.60022	-0.271037	-0.110819	-0.606814	0.174145	-0.202946	-0.0519072	-0.0524752	-0.0889786	0.165342	-0.0843754	-0.129497	-0.183132	-0.00453981	0.130768	0.259106	0.0509977	-0.45533	-0.0183953	-0.0619216	0.256872	0.160346	0.174763	0.276391	0.120938	-0.0485016	0.466507	0.00634588
1609				11	-0.312617	0.811471	-0.345413	-0.804712	0.503298	-0.428394	-0.467207	-0.155509	-0.0559795	-0.174608	-0.17394	-0.27143	-0.133326	-0.0602667	-0.100541	-0.298672	-0.0726077	-0.0966893	-0.161075	-0.11043	-0.271617	-0.0698924	-0.106522	0.0630571	0.0609246	-0.221106	0.114429	0.146969	-0.476757	0.290629	0.050833
1609				12	-0.352957	1.3374	-0.338701	-0.866723	1.05086	-0.310302	-0.762565	0.331258	0.826497	-0.142609	-0.334299	-0.368518	-0.245528	-0.0313995	-0.152936	-0.384126	-0.0652225	-0.219437	0.208817	0.107042	-0.232617	-0.0125467	-0.118776	-0.1705	0.0480054	0.0374336	-0.0947664	0.234735	-0.164507	0.0456396	-0.045599
1610				1	-0.0599049	0.880312	-0.303227	-0.859478	0.2359	-0.463804	0.0340041	0.68602	0.990533	-0.0901445	-0.279439	-0.0600451	-0.242863	-0.075145	-0.16659	-0.110866	-0.193697	-0.931478	0.0693041	0.25855	-0.249503	-0.0624236	-0.0549858	-0.141871	0.0473234	-0.198604	-0.217454	0.085881	-0.30272	0.0678164	0.0318801
1610				2	-0.396166	1.05197	-0.386015	-1.7412	0.780952	-0.138405	-0.873174	0.301048	1.10489	0.102446	-0.258349	0.0577984	-0.173557	-0.155078	-0.0553424	-0.038279	-0.00760174	-0.044968	-0.01255	-0.145982	-0.121289	0.0334742	-0.0486249	-0.0808191	0.0419685	-0.157551	0.438466	0.111602	-0.0411841	0.205254	0.0180477
1610				3	-0.205213	0.30607	-0.375965	-0.494955	0.152629	-0.47378	-0.322373	0.166523	0.302859	0.043157	-1.19953	-0.39636	-0.649785	-0.12879	0.0127781	-0.173112	-0.332048	-0.419503	0.145936	0.0272655	-0.271486	-0.0633319	-0.12251	-0.0757353	0.0188235	-0.237386	0.0796748	-0.0175268	-0.258473	-0.00205123	0.0148108
1610				4	-0.355119	-0.49713	-0.48224	-0.0930715	-0.365228	-0.0337765	-0.323847	0.24743	-0.0574986	0.120462	-0.739125	-0.0807791	-0.202766	-0.0572426	-0.0150791	-0.0600954	-0.186882	-0.49781	0.273352	0.107458	-0.403906	-0.158328	-0.167451	-0.214316	0.251808	0.17709	-0.383523	-0.0749716	-0.415343	0.00910047	0.0575466
1610				5	-0.172713	-2.00288	-0.514446	-0.706032	-0.760192	-0.195972	-0.121067	0.142944	0.488545	0.153276	0.0758302	0.0259339	0.143977	0.0532167	-0.110723	-0.0247714	0.0163876	0.381937	-0.166233	-0.057725	-0.320517	-0.158184	-0.131171	-0.247763	0.149669	-0.00044171	-0.0184812	-0.0165229	-0.281883	0.210614	-0.0540691
1610				6	-0.307974	-0.417173	-0.414218	-0.811568	-0.412448	-0.156552	-0.53083	0.0310136	0.648414	0.110145	-0.218747	-0.181788	-0.0871883	-0.0128833	-0.0812823	-0.114561	0.0482355	-0.735849	0.054776	0.25599	-0.230311	-0.0771051	-0.0881112	-0.0495702	0.155151	0.121298	-0.00646553	0.101532	-0.0371315	0.061566	0.114625
1610				7	-0.253437	-0.867371	-0.378173	-0.653657	-0.398882	-0.239826	-0.495935	-0.0265643	0.73303	0.117914	0.197227	0.00194702	0.236547	0.139679	-0.0949992	0.129822	0.0825812	0.186303	-0.0399836	0.197049	-0.0568673	0.0617466	-0.0952974	0.250901	0.108842	-0.0184958	0.343341	0.188502	0.0516888	0.235533	0.0535042
1610				8	-0.298171	-0.347874	-0.372822	-1.05893	-0.395191	-0.433142	-0.48999	0.249233	0.220862	0.0121843	0.101005	0.0121494	0.225969	-0.0691853	-0.0099268	-0.120353	0.0646684	1.17744	0.163741	0.319585	-0.258838	-0.0206261	-0.115075	0.0337946	0.29102	0.325672	0.482261	0.147046	-0.188535	0.21723	0.0859333
1610				9	-0.259983	0.209217	-0.269924	-0.982235	0.0218949	-0.144796	-0.275074	0.103047	-0.197879	-0.0843276	-0.203168	-0.206275	-0.00923284	0.110385	0.00258547	-0.257852	0.100261	0.592007	-0.132718	0.0340871	-0.64267	-0.183	-0.0762119	-0.0324027	0.1477	-0.104157	0.506784	0.0282372	-0.198283	0.164454	-0.0729237
1610				10	-0.30954	0.847147	-0.414461	-1.07582	0.366887	-0.18716	-0.488488	0.480288	-0.239029	-0.108245	-0.379193	-0.248097	-0.0110402	-0.140377	-0.207537	-0.217734	0.0148122	-0.439817	-0.119362	-0.0763741	-0.72587	-0.251449	-0.0860839	0.0536042	0.201911	0.142764	0.56261	0.098437	-0.0443951	0.27582	-0.030979
1610				11	-0.247427	-0.0208043	-0.423534	-1.33278	-0.145788	-0.305082	-0.305535	-0.0367186	-0.294356	-0.340956	-0.186978	-0.12101	-0.146958	-0.0508215	-0.214822	-0.0860497	-0.234889	-0.137459	-0.219328	0.0323023	-0.53229	-0.151516	-0.166949	0.0593511	0.208378	0.0611367	0.0393142	0.100209	-0.154541	0.0562099	0.0471518
1610				12	-0.17428	0.216143	-0.38549	-0.923933	0.185849	-0.293869	-0.792223	0.0519627	0.0156961	-0.325977	-0.318808	0.0949547	-0.293608	-0.117282	-0.378539	0.433447	-0.338273	-0.741369	-0.0316096	0.106738	-0.45455	-0.131119	-0.273284	-0.364647	0.206197	0.0552024	-0.447054	0.199089	-0.400946	-0.221534	-0.0261154
1611				1	-0.0270813	-1.57129	-0.437545	-0.853917	-1.1217	-0.327335	-0.132497	-0.114951	0.646961	-0.20502	-0.294287	-0.118847	-0.218075	-0.0566189	-0.435982	0.0924106	-0.14492	-0.424104	-0.132776	0.409085	-0.13251	0.0117723	-0.0715664	-0.17956	0.168856	-0.0261944	-0.0247873	0.162808	-0.18077	0.165995	0.0907256
1611				2	-0.268553	-1.92144	-0.474609	-1.01002	-1.71104	0.229602	0.238882	0.177119	0.616903	-0.0157806	-0.321766	-0.252942	-0.149698	-0.140064	-0.427399	0.181695	-0.159947	-0.325137	0.179163	0.295946	-0.0534044	-0.021446	-0.03724	-0.119262	-0.0956982	-0.38364	0.207043	0.0571666	0.0302366	0.186534	0.0770038
1611				3	-0.224519	0.257392	-0.455645	-0.903749	-0.250027	0.0836374	0.143284	0.102114	0.567176	0.128799	-1.20723	-0.644002	-0.40209	-0.0730024	-0.648631	-0.396531	-0.0662688	-0.795834	0.0523275	-0.0823307	-0.057998	-0.00637658	-0.156912	-0.342778	0.268299	0.0928987	0.0822364	0.0716894	-0.192442	0.0611564	0.117029
1611				4	-0.532617	1.08083	-0.555896	-0.721278	0.129611	-0.0140732	-0.0822926	0.288914	0.432854	0.227534	-0.45639	-0.0168644	-0.15492	-0.0499203	-0.818611	-0.114954	-0.0843867	-0.969541	-0.0645786	0.014915	-0.529484	-0.27579	-0.132467	-0.471417	0.108146	-0.110249	-0.153365	-0.0997919	-0.11151	0.144167	-0.0282956
1611				5	-0.370404	0.296777	-0.414276	-0.493427	0.00999196	-0.233879	-0.125542	0.229946	0.174464	0.126331	-0.554384	-0.154384	-0.127755	0.0153463	-0.647207	-0.481775	-0.148165	-0.697173	-0.0400962	0.0218887	-0.586696	-0.252392	-0.106131	-0.382465	0.0125539	-0.191063	0.145013	-0.0656371	-0.210766	0.126883	-0.030643
1611				6	-0.300838	0.257599	-0.390482	-0.537403	-0.113558	-0.224183	-0.423033	-0.071174	0.442029	0.0980024	-1.01153	-0.259013	-0.351431	-0.0784885	-0.486003	-0.161712	-0.0487017	0.28292	-0.11724	0.155098	-0.399838	-0.159964	-0.180396	-0.146567	0.0714513	-0.156269	-0.0498577	0.0850337	-0.243001	-0.0066618	-0.000728035
1611				7	-0.291071	0.0556734	-0.429982	-0.576638	0.024634	-0.320719	-0.365163	0.279315	0.601164	0.0370975	-0.0699775	-0.219748	0.0543687	-0.0379634	-0.335329	-0.197348	0.0479514	-0.772706	0.0811798	0.142604	-0.16836	-0.0574856	-0.159977	-0.259015	0.117583	-0.0803521	0.054946	0.0838518	-0.0639776	-0.0524385	0.0777104
1611				8	-0.214622	-0.136278	-0.437714	-0.882013	-0.0454114	-0.513451	-0.340571	0.160259	0.161135	0.079035	-0.10212	-0.0650658	0.158304	0.133341	-0.250073	-0.101161	0.0849569	-0.718511	0.00241105	0.119724	-0.249275	-0.102804	-0.103278	-0.0572527	0.27743	0.0931218	0.143058	0.0722746	-0.126238	0.0744284	-0.00857773
1611				9	-0.258681	-0.610158	-0.398779	-0.940991	-0.20561	-0.447607	-0.369819	0.187161	-0.319713	0.0346318	0.182174	0.0151602	0.112038	0.0344287	-0.231442	0.0256258	0.0318079	-0.222925	-0.191821	0.0493011	-0.121363	-0.138871	-0.129059	-0.111935	0.357604	0.357366	0.698759	0.0457524	-0.047942	0.0480428	-0.115145
1611				10	-0.392935	-0.218651	-0.44041	-1.66155	-0.291949	-0.241206	-0.234189	0.544545	-0.490384	-0.181096	-0.169238	-0.22239	0.109857	-0.108818	-0.29785	-0.0717066	-0.0313819	0.0796323	-0.363054	-0.125414	-0.259531	-0.0535344	-0.122476	0.00207144	0.219287	-6.50724e-05	0.885135	0.0733763	-0.258096	0.218449	0.0661641
1611				11	-0.204415	0.0591856	-0.476017	-1.06349	0.0978605	-0.290241	-0.637375	-0.267802	0.0328457	-0.255194	-0.206263	0.125703	-0.0910371	-0.112753	-0.308179	0.3196	-0.314229	-0.0807448	-0.193266	0.243885	-0.572415	-0.149419	-0.226908	-0.268442	0.192219	0.0707154	0.192549	0.133337	-0.31946	0.154673	0.0694506
1611				12	-0.411854	0.880136	-0.561893	-1.31759	0.453468	0.0843028	-0.777663	-0.0679051	0.315657	-0.248581	-0.775329	-0.779249	-0.637672	-0.0453288	-0.344922	-0.511345	-0.143266	0.0308299	-0.191089	0.0392724	-0.257374	-0.111988	-0.191404	-0.35593	0.185622	0.0252609	-0.0474984	0.265531	-0.558056	0.104304	0.0336628
1612				1	-0.332562	-2.02537	-0.504611	-1.2477	-1.61344	0.160011	0.253912	-0.311894	0.421653	-0.302923	-0.801378	-0.425346	-0.787164	-0.0883781	-0.326835	-0.0896735	-0.548587	-0.506974	-0.0957216	-0.0114557	0.0377703	-0.0470465	-0.127787	-0.277302	0.141781	0.0413219	-0.101213	0.2091	-0.467538	0.018685	-0.0244534
1612				2	-0.16787	-0.638576	-0.435616	-1.46708	-0.410782	0.453024	-0.454709	-0.410057	0.379419	-0.162051	-0.774362	-0.109019	-0.480848	-0.0908215	-0.423196	0.140893	-0.349548	-0.307671	-0.0962636	-0.0892045	0.045669	0.0146486	-0.14461	-0.251197	0.113303	-0.367531	-0.0454821	0.151954	-0.232915	-0.0332823	0.0846637
1612				3	-0.350862	-0.119234	-0.444744	-1.12782	-0.165707	-0.0582397	-0.39206	0.0591961	0.487014	0.021747	1.49703	0.585163	1.64873	-0.132592	-0.550784	0.621353	0.108654	-0.409074	-0.135638	0.0167952	-0.294008	-0.11981	-0.127864	-0.361925	0.167944	0.047418	-0.0441064	0.0830057	-0.314081	0.0373679	0.00112934
1612				4	-0.463464	-0.528761	-0.490404	-1.17985	-0.410529	0.0832906	-0.2825	0.103299	0.675927	0.0385315	-0.70862	0.0130638	-0.301668	-0.0923531	-0.614471	0.256442	-0.342972	0.0284843	-0.0764805	0.00430349	-0.500115	-0.232427	-0.0996716	-0.4598	0.143285	0.112884	-0.298846	-0.116725	-0.29753	0.188803	-0.124802
1612				5	-0.288863	-0.434446	-0.516611	-0.183127	-0.329217	-0.498635	-0.560074	0.148941	0.27703	0.0270061	-0.482112	-0.246035	-0.147308	-0.0659487	-0.617372	-0.481837	-0.361536	-1.4934	-0.0470885	0.208886	-0.323586	-0.207982	-0.197106	-0.292374	0.394256	0.207367	-0.195609	-0.0868048	-0.25058	-0.00396837	-0.0936733
1612				6	-0.304704	-0.384306	-0.450873	-0.670676	-0.199711	-0.263714	-0.574406	-0.0848101	0.221236	-0.00926692	-0.809315	-0.447025	-0.248699	-0.00625337	-0.39285	-0.554434	-0.16962	-0.42554	0.198506	0.242349	-0.305991	-0.170121	-0.134883	-0.165125	0.19737	0.124557	-0.0447899	0.00562884	-0.246202	0.134577	-0.127895
1612				7	-0.295519	-1.35591	-0.521644	-0.536338	-0.487889	-0.378152	-0.778424	0.00526004	0.622736	-0.0308041	-0.300318	-0.166096	-0.159008	-0.0630775	-0.252062	-0.25616	-0.00123151	-0.431943	-0.120524	-0.0053285	-0.200245	-0.138699	-0.165413	-0.211262	0.223939	-0.0469711	0.130403	0.0505628	-0.102812	0.284703	-0.0937507
1612				8	-0.342664	0.0816381	-0.472034	-0.83257	-0.168455	-0.333273	-0.51459	-0.239397	0.230251	0.0158655	-0.292167	-0.158209	-0.235644	0.0224952	-0.157474	0.115792	-0.0738757	-1.57578	-0.339825	-0.12608	-0.445627	-0.0884915	-0.102227	-0.0630186	0.163101	0.0734504	0.31198	0.00980892	-0.171457	0.220175	-0.0331463
1612				9	-0.297131	-0.253685	-0.438601	-0.896899	-0.24474	-0.156654	-0.579941	0.00518843	-0.251277	-6.28789e-05	-0.496434	-0.0523962	0.0572192	-0.011012	-0.327596	0.0263363	-0.0215521	-0.38272	-0.276499	-0.0232935	-0.426245	-0.0436337	-0.0933857	-0.0652892	0.244193	0.209238	0.485313	0.110768	-0.0406693	0.152955	-0.00270278
1612				10	-0.319325	-0.349019	-0.32047	-1.67002	-0.379424	-0.339117	-0.518536	-0.0844448	-0.254643	-0.173981	-0.388638	-0.123172	-0.070435	-0.104168	-0.246103	-0.0553015	0.0551945	-0.366483	-0.262974	0.115557	-0.497465	-0.044072	-0.0859694	-0.0438861	0.221442	0.267115	0.611514	0.147553	0.0624527	0.267645	-0.0140036
1612				11	-0.332213	0.319157	-0.345024	-1.10446	0.0376474	-0.468939	-0.537213	-0.126651	0.0171062	0.00868212	-0.130799	-0.0151113	-0.108325	-0.0646536	-0.195367	0.0094029	-0.102551	-0.531353	-0.0568215	0.213207	-0.275464	-0.0687595	-0.0970024	-0.0720309	-0.00576967	-0.05825	0.316776	0.191496	-0.0946653	0.249508	0.0153697
1612				12	-0.251543	0.983753	-0.450619	-0.84602	0.265564	-0.18882	0.618056	-0.480119	0.0637861	-0.119589	-0.452714	-0.194301	-0.213232	-0.0383308	-0.347114	-0.192774	-0.131379	0.548068	0.0119981	0.150875	-0.503224	-0.106333	-0.189067	-0.330221	0.106378	0.0369186	0.136967	0.160739	-0.387324	-0.0893454	0.0667019
1613				1	-0.105803	3.14057	-0.416251	-1.29999	1.1076	-0.268497	0.657313	-0.213083	0.562734	-0.173047	-0.499479	-0.37657	-0.052855	-0.147508	-0.373119	-0.410246	-0.196812	-0.763627	0.0946012	0.507212	-0.21445	-0.0623835	-0.109456	-0.282239	0.10787	0.110526	0.181033	0.158295	-0.214745	-0.0688185	0.0333202
1613				2	-0.354878	1.1884	-0.424274	-1.36193	0.208935	0.11951	0.399786	-0.1777	1.0911	-0.146136	-0.554238	-0.139512	-0.421302	-0.215848	-0.279477	-0.119988	-0.364134	-0.203794	-0.191187	-0.0628764	-0.0935884	-0.0621393	-0.151204	-0.247056	0.0693943	-0.166253	0.210538	0.0350566	-0.115842	-0.17703	0.0820754
1613				3	-0.272695	0.874776	-0.508355	-1.06493	0.312266	-0.212086	0.048695	0.141723	0.652043	-0.0102297	-0.933224	-0.277763	-0.441367	-0.207366	-0.51662	-0.0340534	-0.309654	-0.630337	-0.100588	-0.0733213	-0.438518	-0.184452	-0.193339	-0.4413	0.261633	0.217993	0.0310012	-0.0136187	-0.0398809	-0.0804413	0.0402777
1613				4	-0.404761	-0.874031	-0.468078	-1.08709	-0.775068	-0.0669867	-0.527159	-0.327156	0.585169	0.0977089	-0.262286	-0.175275	-0.00793409	-0.135444	-0.502046	-0.259522	-0.144964	-0.0536995	0.106388	0.386426	-0.546509	-0.221002	-0.156572	-0.414748	0.10588	0.0414449	-0.340623	-0.171934	-0.400321	0.0243383	-0.0390969
1613				5	-0.439515	-1.161	-0.309352	-0.833054	-0.544533	-0.364357	-0.36438	-0.0386834	0.125585	0.140905	-0.419421	0.0865132	-0.0954259	-0.0782225	-0.17559	-0.100687	-0.323382	-0.372994	-0.10107	0.014059	-0.350406	-0.204218	-0.19682	-0.418018	0.198454	-0.0432846	-0.0610418	-0.100807	-0.196833	0.00478255	-0.0798049
1613				6	-0.211021	-1.43188	-0.447505	-0.754193	-0.688593	-0.559159	-0.351519	-0.0369115	0.237534	0.115235	-0.294089	-0.076228	0.0228542	0.100444	-0.234648	-0.269253	-0.115835	-0.0234602	-0.00673316	0.201317	-0.11389	-0.069552	-0.092439	-0.0636274	0.287055	0.117242	-0.00640259	0.0209811	-0.193694	0.0748411	-0.0276388
1613				7	-0.329883	-0.868546	-0.498325	-0.645662	-0.393692	-0.306367	-0.419004	-0.0184136	0.489571	0.114931	-0.00209306	0.0508114	0.222376	0.0357575	-0.148617	0.177408	0.031594	-0.614781	0.0297977	0.246837	-0.137785	-0.0999088	-0.127602	-0.105021	0.147767	0.0124042	0.101447	0.087758	-0.134689	0.174078	-0.053395
1613				8	-0.36588	-0.720169	-0.398405	-1.24535	-0.462473	-0.500432	-0.35202	-0.185113	0.146658	0.0658419	0.237907	0.0650078	0.284061	-0.024231	-0.0455732	0.0763059	-0.0145953	-2.10851	-0.0945958	0.0456878	-0.216791	0.044033	-0.0958701	-0.0232599	0.0308344	0.0106414	0.183806	0.105123	-0.085966	0.0453356	0.03046
1613				9	-0.435883	-1.08184	-0.424782	-1.22993	-0.72566	-0.25703	-0.510471	-0.276287	-0.265464	-0.136633	0.00618286	-0.00754871	0.315114	-0.159741	-0.0436582	-0.0221257	-0.0170794	-0.428785	-0.10911	0.222592	-0.234851	0.00493507	-0.14019	-0.0673567	0.125771	0.0570099	0.527011	0.125447	0.0856525	0.234677	-0.0185242
1613				10	-0.242808	0.178147	-0.297056	-1.35704	-0.0345096	-0.446008	-0.434441	0.179285	-0.236618	-0.211226	-0.392378	-0.411055	-0.0122609	-0.0983543	-0.130917	-0.443515	-0.0223506	-0.863862	-0.210745	0.0206842	-0.509785	-0.0775841	-0.0860514	-0.0454826	0.112584	0.137078	0.182687	0.0870082	-0.140911	0.0230775	0.0744459
1613				11	-0.257374	-1.28209	-0.463305	-0.776194	-0.72152	-0.486383	-0.753203	-0.258679	-0.304242	-0.267859	-0.223254	-0.148354	-0.118151	-0.159447	-0.229247	0.0746365	-0.124127	-0.16606	-0.122621	0.275399	-0.438708	-0.0930763	-0.149786	-0.283071	0.182024	0.0725254	-0.201582	0.14324	-0.552629	-0.16538	-0.00319455
1613				12	-0.325481	-2.15672	-0.471733	-0.722617	-1.04969	-0.12697	-1.24107	-0.682056	0.15189	-0.366919	-0.358145	-0.137967	-0.270676	-0.150157	-0.406425	0.0394965	-0.27126	-0.423941	-0.212359	-0.0636691	-0.551791	-0.335642	-0.233152	-0.480993	0.183896	0.061036	-0.321104	0.0855498	-0.503603	-0.202691	-0.0674
1614				1	-0.191243	-1.61031	-0.441483	-0.829465	-0.758775	-0.289873	-1.2744	-0.1952	0.037269	-0.484373	-0.567809	0.0262932	-0.225898	-0.216066	-0.503528	0.394499	-0.372594	-0.599462	0.0487066	0.197111	-0.370372	-0.0817469	-0.0605114	-0.308526	0.207035	0.148439	-0.0628942	0.0669105	-0.318589	-0.0806211	0.0304153
1614				2	-0.212309	-0.925323	-0.469162	-0.748101	-0.114148	-0.235961	-1.44212	-0.0646162	-0.00312284	-0.399808	-0.736839	-0.454044	-0.662047	-0.188968	-0.469617	-0.107507	-0.562044	-0.857384	-0.0339982	0.0571063	-0.208293	-0.0463999	-0.189361	-0.315187	0.140382	-0.0548525	0.118113	0.150762	-0.168807	-0.0595561	-0.072395
1614				3	-0.357686	-0.921886	-0.453114	-1.41281	-0.460812	-0.053731	-0.703775	0.0939065	0.180886	0.0339884	-0.485258	-0.0597723	-0.190535	-0.175908	-0.561261	0.129691	-0.221622	-0.25303	-0.0699889	0.0291157	-0.227823	-0.096928	-0.191674	-0.291544	0.199867	-0.0344149	0.0301638	-0.00132389	-0.361889	-0.0158852	0.00442715
1614				4	-0.303992	-0.949397	-0.443716	-1.40634	-0.495963	-0.140437	-0.565167	-0.142383	0.0454067	0.0678055	-0.231519	-0.153458	0.0579228	-0.194995	-0.728992	-0.0224353	-0.112192	-0.583742	-0.044828	0.0758157	-0.47824	-0.197095	-0.146484	-0.385526	0.134523	0.221878	-0.125894	-0.0740351	-0.417769	-0.0627227	-0.0559998
1614				5	-0.329392	-1.5778	-0.39912	-0.907841	-0.687675	-0.528699	-0.367823	0.190271	0.0291414	0.0641822	-0.308715	0.155368	0.0223834	-0.149187	-0.417131	0.191787	-0.0412754	-0.16007	-0.0704306	0.0775289	-0.404738	-0.264874	-0.17323	-0.237297	0.045139	-0.0555259	-0.117003	-0.182245	-0.425034	-0.193658	-0.159914
1614				6	-0.389412	-1.3957	-0.427308	-0.959111	-0.590012	-0.629835	-0.303356	-0.439366	0.109502	0.120395	-0.0207829	0.054435	-0.0147739	0.0316876	-0.324673	-0.148166	-0.101941	0.794256	-0.210722	0.0389514	-0.155754	-0.109631	-0.185724	-0.102413	0.132579	-0.0830559	-0.089275	0.00432421	0.0423944	-0.180049	-0.0798716
1614				7	-0.315864	-1.04296	-0.463426	-0.777828	-0.565195	-0.305634	-0.565376	-0.239037	0.238266	0.0224243	-0.180461	0.238985	0.0229127	-0.102806	-0.307979	0.246416	-0.0775026	-0.0608548	-0.0591934	0.155315	-0.16593	-0.176949	-0.241599	-0.254912	0.0788431	-0.0516002	0.334071	0.0355653	-0.142731	0.0834487	-0.0553577
1614				8	-0.375154	-0.671053	-0.485857	-1.23805	-0.452445	-0.150478	-0.313868	0.0935596	-0.204826	-0.0710218	-0.258904	0.121906	0.0459515	-0.199263	-0.15998	0.190403	-0.0941489	-0.0880846	-0.0425652	0.112256	-0.236808	-0.092701	-0.204248	-0.252691	0.0897219	0.00387842	0.576011	0.0982431	-0.168339	0.199545	-0.0308708
1614				9	-0.377493	-1.14043	-0.289471	-1.15075	-0.68413	-0.0772537	-0.451267	-0.184875	-0.316287	-0.143221	-0.630965	-0.221149	0.0160052	-0.198855	-0.132033	-0.156091	-0.0650873	0.346264	0.0102422	0.134143	-0.458859	-0.0929329	-0.164377	0.00084432	0.0573159	0.0242054	0.309318	0.139281	-0.0187996	0.233571	-0.0245839
1614				10	-0.433049	-0.253339	-0.337716	-0.87187	-0.260142	-0.480779	-0.176165	-0.162518	-0.562642	-0.110718	-0.306922	-0.24375	-0.0657601	-0.109322	-0.231436	-0.230491	0.00346152	-0.107649	0.0506421	0.164394	-0.0504493	-0.0412244	-0.149124	0.150055	0.0981932	-0.126524	0.0192537	0.0419165	0.00466194	-0.0966544	-0.0312861
1614				11	-0.238371	-0.356033	-0.434355	-0.822483	-0.137397	-0.447722	-0.69908	0.45458	0.386234	-0.262934	-0.520223	-0.494087	-0.404445	-0.132046	-0.254474	-0.473654	-0.233237	-0.389877	-0.0741402	0.14199	-0.325557	-0.11597	-0.0932526	-0.154114	0.0616656	-0.0673347	-0.0823708	0.124293	-0.368919	-0.0921398	0.0223429
1614				12	-0.322256	0.394645	-0.413935	-0.894093	0.0247948	-0.308981	-0.141698	-0.0151846	0.288495	-0.132658	-0.646546	-0.28669	-0.338164	-0.0913646	-0.267913	-0.169998	-0.065173	0.626902	-0.285548	-0.0904511	-0.287074	-0.142412	-0.223947	-0.252598	0.0330613	-0.136854	-0.178331	0.114143	-0.526322	-0.239324	-0.0526314
1615				1	-0.089259	-3.94115	-0.361842	-0.789255	-2.47707	-0.158312	0.407777	-0.0281638	1.02101	-0.101354	-0.29777	0.0286047	0.00504494	-0.229238	-0.216198	0.037313	-0.126837	-1.21719	0.0377279	0.31589	-0.280572	-0.153112	-0.150754	-0.21247	-0.035755	-0.0170964	-0.18564	0.0463302	-0.261428	-0.222032	-0.130698
1615				2	-0.280653	-2.69883	-0.341162	-0.415433	-1.46424	-0.17649	-0.711181	0.0352678	1.41956	-0.000939496	-0.679978	-0.176798	-0.419287	-0.262052	-0.274369	-0.233108	-0.271873	-0.157341	0.158823	-0.312487	-0.564332	-0.198021	-0.192048	-0.293351	-0.109788	-0.204953	0.101998	0.0510002	-0.0282485	-0.123351	-0.127676
1615				3	-0.40891	-0.163686	-0.341544	-1.28818	-0.164874	0.101388	-0.439731	-0.112446	1.23834	0.10658	-1.4865	-0.638343	-0.773196	-0.242695	-0.101272	-0.435756	-0.288641	0.0295499	-0.13663	-0.273078	-0.491445	-0.177	-0.257315	-0.33906	-0.0184709	-0.205696	-0.0129289	0.0383184	-0.21695	-0.0470685	-0.12261
1615				4	-0.336023	-0.454985	-0.317371	-0.813821	-0.278043	-0.292979	-0.34438	0.175284	0.553522	0.136321	-0.339573	0.0912017	-0.309083	-0.184324	-0.170139	0.0944941	-0.265556	0.264819	-0.0999084	-4.24067e-05	-0.662264	-0.270004	-0.336612	-0.493405	-0.035313	-0.0758961	-0.289271	-0.101543	-0.280631	-0.0558161	-0.199904
1615				5	-0.361522	-1.41714	-0.318672	-0.82178	-0.542119	-0.774009	-0.325356	0.0749103	0.00744909	-0.0595589	-0.414315	-0.0178922	-0.288354	-0.156899	-0.164584	-0.0391466	-0.440335	-0.340181	-0.0418128	0.129165	-0.697781	-0.295235	-0.120511	-0.308418	0.0872189	0.172336	-0.120471	-0.104099	-0.14459	0.00390708	-0.102014
1615				6	-0.319114	-0.284339	-0.421843	-0.906292	-0.392202	-0.753579	-0.519808	0.10958	-0.0442725	-0.0475398	-0.451724	-0.134291	-0.208704	-0.149982	-0.130782	-0.240752	-0.25234	-0.770971	-0.158018	0.0948148	-0.425026	-0.16392	-0.153381	0.000839106	-0.00395956	-0.0954355	-0.14649	-0.0057752	-0.0943596	0.0603262	-0.0422529
1615				7	-0.367941	0.206617	-0.424768	-0.41018	-0.138887	-0.409167	-0.48289	-0.0724499	0.558895	-0.0369572	0.513294	0.246082	0.128196	-0.247728	-0.13949	0.192197	-0.103666	-1.04177	0.00260372	0.37168	-0.181152	-0.0461617	-0.211894	0.082681	0.0159273	-0.130299	0.0728636	0.0908059	0.0312802	0.131089	0.0103257
1615				8	-0.317329	0.043245	-0.37113	-1.14462	-0.2202	-0.410581	-0.308626	-0.0417051	0.497004	0.0400831	-0.507573	-0.317233	-0.159277	-0.13517	-0.186984	-0.298379	-0.122118	-1.19598	-0.108014	0.270875	-0.139768	-0.0941144	-0.214774	0.178616	-0.0263165	0.0348738	0.00307172	0.0980124	-0.0932873	0.00213801	0.00646744
1615				9	-0.420264	-0.112861	-0.32782	-0.961543	-0.299107	-0.347233	-0.424101	-0.335336	-0.126003	-0.167602	-0.153125	-0.106403	0.0174128	-0.143645	-0.119561	-0.0667395	-0.12658	0.0193964	-0.0990794	0.119353	0.092027	-0.0362274	-0.219078	0.0620092	-0.105954	-0.0127638	0.476594	0.138917	-0.0418003	0.163027	-0.0247937
1615				10	-0.328425	0.0547667	-0.310584	-0.958465	-0.284284	-0.454525	-0.188895	-0.088136	-0.277172	-0.175671	-0.249195	-0.212345	-0.0147805	-0.116852	-0.157446	-0.236964	-0.0681899	-0.366863	0.0374928	0.203921	-0.00792306	0.0875961	-0.105436	-0.136171	-0.0669279	-0.0491602	0.290919	0.107892	0.00758209	0.109665	0.045334
1615				11	-0.256445	1.07971	-0.420305	-1.27791	0.589992	-0.500141	-0.383156	-0.209642	-0.162198	-0.2685	0.00154886	0.186024	-0.106243	-0.153015	-0.307376	0.338192	-0.416096	-0.537523	-0.120041	0.102026	-0.251584	-0.0793186	-0.296439	-0.21277	0.0113764	-0.105434	-0.175118	0.119456	-0.299356	-0.27783	-0.0357683
1615				12	-0.5046	3.21281	-0.46656	-1.84064	1.47017	-0.373897	-0.43966	0.0351594	0.263131	-0.447989	-0.471823	-0.101013	-0.696717	-0.247346	-0.398178	0.342255	-0.766022	0.344276	0.0150766	0.101544	-0.461066	-0.236263	-0.212652	-0.332281	0.0467999	0.141012	-0.301141	0.0535693	-0.29364	-0.290033	-0.0151615
1616				1	-0.144393	-3.34642	-0.371625	-0.512155	-1.78782	-0.435846	-1.57689	0.152243	0.9405	-0.097053	-0.195641	0.0937602	-0.153783	-0.194335	-0.352394	0.311589	-0.356757	-0.740767	0.0561453	0.173522	-0.364121	-0.124319	-0.243804	-0.228581	-0.0424098	0.11129	-0.130004	0.0274703	-0.109347	-0.16085	-0.0795052
1616				2	-0.387848	-3.99144	-0.283602	-0.855244	-2.07964	0.26696	-1.2024	0.258036	1.38745	0.0897568	-0.431738	-0.178949	-0.466081	-0.231855	-0.142806	-0.260232	-0.26214	-0.0367839	-0.199051	0.139566	-0.157231	0.0366957	-0.113175	-0.16985	-0.265372	-0.56336	0.0244127	0.124914	-0.0730445	0.0552339	0.0577453
1616				3	-0.4026	0.710319	-0.318047	-0.912001	0.131499	-0.160859	-0.0886045	-0.0148314	0.878276	0.0355352	-2.8243	-0.785964	-1.95671	-0.159276	-0.27476	-0.29979	-0.765112	0.0617684	0.0429052	-0.0933886	-0.107755	-0.00681909	-0.224736	-0.233494	0.0448874	-0.179215	0.0290042	0.0549334	-0.112885	0.076089	0.0136377
1616				4	-0.312165	0.506869	-0.335304	-0.979275	0.148489	0.0794839	-0.317129	-0.492256	0.741431	0.236795	-0.457945	0.217736	-0.327728	-0.26879	-0.287691	0.121028	-0.258661	0.35887	-0.0298878	-0.13992	-0.542067	-0.205184	-0.309699	-0.403498	0.0483738	-0.230928	-0.109361	-0.0991377	-0.405658	0.195639	-0.0794964
1616				5	-0.337409	-0.681784	-0.414234	-0.805915	-0.449884	-0.458378	-0.175234	-0.367659	0.266055	0.0688915	-0.393257	-0.0526174	-0.0975125	-0.126004	-0.234855	-0.113518	-0.524203	0.34817	0.151117	0.244549	-0.501429	-0.238493	-0.18324	-0.24114	0.0439717	0.153877	-0.0931711	-0.0454077	-0.171717	-0.0368053	-0.0655246
1616				6	-0.391319	0.694864	-0.335795	-0.807277	-0.195884	-0.528618	-0.558838	-0.206619	0.396624	-0.0290957	0.854446	0.683511	0.381491	-0.186494	-0.0553404	0.925386	-0.225898	-0.716919	-0.027219	0.00296739	-0.350787	-0.116959	-0.192304	0.165895	-0.00157251	0.025312	-0.194095	0.000297801	-0.0333035	-0.0459627	-0.0965151
1616				7	-0.301628	0.517767	-0.280824	-0.599982	-0.0975908	-0.58292	-0.379729	-0.22554	0.901443	-0.0849804	0.806035	0.99847	0.623747	-0.0339637	-0.125421	1.21388	-0.1517	-0.21526	0.114277	0.162869	-0.049238	-0.024332	-0.201399	0.259437	-0.0272369	0.0280898	0.1205	0.0642557	0.0245816	0.265621	-0.114428
1616				8	-0.322009	-0.0848964	-0.298893	-0.890828	-0.238654	-0.614872	-0.461018	-0.232027	0.34079	0.0129911	-0.211121	0.196846	-0.134545	-0.09371	-0.0166445	0.214324	-0.147352	0.113299	-0.0592755	0.0853416	0.0317405	-0.0334073	-0.229388	0.431126	-0.138877	-0.0431892	0.148486	0.0484365	-0.0919579	0.243797	-0.080706
1616				9	-0.340371	-0.70216	-0.262909	-0.922595	-0.604393	-0.316917	-0.334459	-0.359492	-0.171581	-0.139112	0.152333	0.0155111	0.00570552	-0.195931	0.13148	-0.210868	-0.112357	-0.473733	0.0272891	0.0452766	0.2187	0.0413216	-0.27047	0.045606	-0.106448	-0.0757826	0.0391993	0.126546	0.0773785	0.240277	-0.0533925
1616				10	-0.344897	0.30022	-0.268253	-1.07631	0.152049	-0.484633	-0.415236	-0.0580032	-0.270886	-0.225024	-0.296031	-0.285877	-0.108593	-0.150547	-0.113514	-0.332459	-0.110197	-0.612498	0.00740821	-0.0188923	0.204819	0.106086	-0.146411	0.0593014	-0.142159	-0.189133	-0.0910997	0.137955	0.138079	0.103863	-0.0728911
1616				11	-0.280913	-0.0112485	-0.429323	-1.36219	-0.0941141	-0.51348	-0.74029	0.0540683	0.0312969	-0.221026	-0.111919	0.229672	-0.229775	-0.13838	-0.209089	0.447183	-0.423146	-0.972009	-0.198345	0.251786	-0.393019	-0.0628963	-0.283938	-0.272322	-0.131703	-0.109457	-0.151041	0.163321	-0.388418	0.049168	-0.1292
1616				12	-0.289552	-0.377886	-0.368595	-1.06229	-0.248481	-0.365853	0.0251409	-0.0117294	0.255473	-0.468458	-0.325513	-0.185286	-0.47886	-0.208546	-0.356649	0.0438772	-0.474616	-0.890431	-0.0340415	0.0609418	-0.584689	-0.2538	-0.183904	-0.332928	0.00292136	-0.0983639	-0.506775	0.147592	-0.25716	-0.135415	-0.0899525
1617				1	-0.281764	1.29277	-0.313153	-0.985388	0.172377	-0.233705	0.545267	-0.147268	0.407758	0.0885225	-0.291246	-0.14928	0.0169621	-0.0785248	-0.140959	0.0222879	0.0936043	0.326909	-0.00587978	-0.0881445	-0.295329	-0.0945452	-0.229844	-0.162495	-0.208279	-0.317536	-0.399659	0.112385	-0.100043	0.084374	-0.0340703
1617				2	-0.152968	2.95333	-0.227922	-1.22698	0.992115	-0.125825	0.724917	0.17356	0.545318	0.0146092	-0.522552	-0.243345	-0.358238	-0.103948	-0.137231	0.0646778	-0.270025	0.110045	0.0671256	-0.470937	-0.352829	-0.047611	-0.123313	-0.115466	-0.23079	-0.39135	-0.349882	0.0730701	-0.130912	0.22626	0.0617889
1617				3	-0.373513	1.47715	-0.311922	-1.30404	0.518142	-0.00888948	0.313991	-0.133548	0.887347	0.0345892	-1.20683	-0.646227	-0.567513	-0.124463	-0.11827	-0.384866	-0.270676	0.0481933	-0.0211035	-0.0676975	-0.277383	-0.0513938	-0.0969702	-0.196759	-0.140778	-0.215975	-0.294854	0.0882185	-0.00175114	0.221839	0.00197048
1617				4	-0.291827	0.0477832	-0.357238	-0.671371	-0.079952	-0.134145	-0.449212	0.0112923	0.830979	0.131738	-0.324586	-0.461294	-0.13905	-0.255454	-0.0901122	-0.477058	-0.0432719	0.921855	0.0697845	-0.118491	-0.528073	-0.254562	-0.266078	-0.253463	-0.173556	-0.177299	-0.239644	-0.0979265	-0.17179	0.0834642	-0.16704
1617				5	-0.360217	-0.440975	-0.36355	-0.703142	-0.338594	-0.357705	-0.377697	-0.487238	0.353648	0.152115	-0.278247	-0.20108	-0.21009	-0.108294	0.0292422	-0.33662	-0.221272	0.805967	-0.0431727	-0.100987	-0.615989	-0.252745	-0.237765	-0.314779	-0.129503	-0.130973	-0.123708	-0.119855	-0.0416889	-0.0734683	-0.175724
1617				6	-0.290622	-1.34059	-0.314211	-0.657704	-0.564078	-0.528132	-0.405216	0.0190744	0.739365	0.0670308	-0.485918	-0.0986641	-0.129581	-0.0986224	0.0503629	-0.207607	-0.173866	-0.757676	-0.0458491	0.170062	-0.457453	-0.122277	-0.13491	0.128946	-0.0746354	-0.16046	-0.0634438	-0.0106218	-0.0365049	0.0108458	-0.00689068
1617				7	-0.300445	-1.17692	-0.407907	-0.796674	-0.453523	-0.391337	-0.575092	-0.0884284	1.01374	0.127679	-0.0468585	0.18507	-0.140005	-0.0553165	0.0435792	0.272156	-0.184026	-0.647813	-0.0884426	0.161828	-0.0787046	-0.128527	-0.252114	0.32167	-0.136777	-0.158158	0.28362	0.0272092	-0.0717119	0.238711	-0.107854
1617				8	-0.316983	-0.957051	-0.345526	-0.755376	-0.429681	-0.370332	-0.460497	-0.269325	0.411036	0.0756056	-0.271912	-0.166249	-0.246674	0.0244521	-0.0195322	-0.218765	-0.127121	0.599166	-0.138789	-0.114076	0.0996936	-0.0506268	-0.253448	0.349014	-0.197197	-0.147844	0.417355	0.0745615	-0.0504092	0.237951	-0.118046
1617				9	-0.280724	-0.475368	-0.307772	-1.0517	-0.410787	-0.385976	-0.364828	-0.0540219	-0.205036	-0.165466	-0.247618	-0.174188	-0.183057	-0.0249166	0.112773	-0.303891	-0.159787	0.427483	-0.0498526	-0.160102	0.200141	-0.00929375	-0.257952	0.275419	-0.0174245	0.0246021	0.59004	0.0617684	0.092231	0.277586	-0.075945
1617				10	-0.38653	0.378931	-0.186481	-1.16396	0.095829	-0.477866	-0.439263	-0.0616077	-0.356942	-0.181759	-0.0368587	-0.253236	-0.0210175	-0.150414	0.0319501	-0.297951	-0.151841	-0.060595	-0.0694255	0.131779	0.431906	0.18501	-0.175149	0.29624	-0.152155	-0.14215	0.362193	0.142056	-0.0511623	0.352019	-0.0541991
1617				11	-0.356131	0.22474	-0.267933	-0.620212	0.187082	-0.541204	-0.63926	0.0601384	-0.18233	-0.265144	-0.0999288	-0.157376	-0.124067	-0.0977442	0.0765806	-0.135257	-0.198502	-0.172816	0.00360139	0.265667	-0.155881	0.134743	-0.280173	-0.133415	-0.180741	-0.1026	0.180986	0.273871	-0.201626	0.233166	-0.0821206
1617				12	-0.247221	0.00183543	-0.259106	-0.906665	-0.0351079	-0.439587	-0.263183	-0.0304672	0.666455	-0.170673	-0.325741	-0.0211514	-0.109257	-0.102629	-0.0541815	0.340229	-0.49837	-0.566183	-0.052312	0.236426	-0.266339	-0.0108892	-0.201767	-0.21776	-0.252463	-0.179849	-0.138073	0.132732	0.18222	0.11044	-0.0973454
1618				1	-0.200667	-0.257534	-0.262099	-1.10414	0.78601	-0.396019	-2.2022	-0.311451	0.87013	-0.239662	-0.243266	-0.0934976	-0.0707765	-0.127042	-0.0172575	-0.0911498	-0.360197	-0.25937	-0.154235	0.782341	-0.166974	0.000209936	-0.197795	-0.127944	-0.187303	-0.163483	-0.182113	0.0553863	0.264342	0.098107	-0.0550816
1618				2	-0.335076	-0.153846	-0.202244	-0.93991	-0.195761	-0.468953	-0.210123	0.118879	0.697906	0.0740727	-0.27805	-0.0323705	-0.180158	-0.158397	-0.0142906	0.00632148	-0.20876	-0.523787	-0.175832	0.222453	-0.186587	-0.0516127	-0.210547	-0.15293	-0.281211	-0.405916	-0.137889	0.0215049	0.461959	0.0919866	-0.0487897
1618				3	-0.335279	0.626538	-0.286579	-0.999756	0.11201	0.121653	-0.31997	-0.16897	0.533923	0.0960783	-0.44445	-0.346372	0.034503	-0.1894	-0.00440331	-0.22594	-0.103378	0.037298	0.0954927	0.167401	-0.223396	-0.0233558	-0.165652	-0.175661	-0.221737	-0.30225	-0.0324067	0.0949152	0.0169065	0.20156	0.00448437
1618				4	-0.395467	-0.281082	-0.346664	-1.11651	-0.260537	-0.0943226	-0.439535	-0.14814	1.08949	0.184121	-0.452445	-0.162364	-0.36372	-0.151403	-0.131607	-0.0832008	-0.0865287	-0.135298	0.160609	0.0673595	-0.430281	-0.112893	-0.190465	-0.254088	-0.161946	-0.166155	-0.11234	-0.0550512	0.0167989	0.132906	-0.108166
1618				5	-0.462441	-0.99554	-0.236736	-0.573312	-0.353839	-0.454469	-0.411987	-0.586774	0.555926	0.0709419	-0.460002	-0.045564	-0.44386	-0.0549128	0.200299	0.0835288	-0.184349	0.180203	0.124205	0.181656	-0.404006	-0.103201	-0.208753	-0.0814973	-0.167871	-0.262012	-0.225478	-0.0484366	0.116114	0.194665	-0.115118
1618				6	-0.319042	-1.76911	-0.368565	-0.821009	-0.648978	-0.48987	-0.559359	-0.777297	0.928147	-0.06421	-0.219435	0.117781	-0.13541	-0.10444	0.14574	0.216415	-0.254192	-0.336609	-0.0558026	-0.103117	-0.109339	-0.0809617	-0.187034	0.131464	-0.189552	-0.34607	-0.268163	0.0391505	-0.0832951	0.0417105	-0.0584997
1618				7	-0.300449	-0.789267	-0.314071	0.0311412	-0.330186	-0.487864	-0.715066	-0.412108	1.12169	0.103569	-0.460814	0.119142	-0.102118	-0.0514293	0.0165387	0.127414	-0.146818	0.3399	-0.119631	0.198452	0.00663973	-0.00297546	-0.166638	0.445733	-0.231368	-0.336154	0.0938979	0.0946969	0.0353619	0.258978	-0.0134551
1618				8	-0.321332	-0.508185	-0.264894	-0.488074	-0.20391	-0.375434	-0.707243	-0.302232	0.577242	-0.0596636	-0.189484	-0.00864067	-0.0924915	-0.0518342	0.18452	-0.075233	-0.245577	-0.564529	-0.15671	-0.0486668	0.134789	0.0118408	-0.261653	0.495997	-0.278747	-0.43065	0.0766782	0.132368	-0.0898398	0.331995	-0.0593971
1618				9	-0.392996	-0.64475	-0.252268	-0.69303	-0.52082	-0.314564	-0.411892	0.198175	-0.0950732	-0.183395	-0.652413	-0.155446	-0.12375	-0.134051	-0.0666017	-0.175213	-0.200566	0.595142	0.143019	-0.00568775	0.428918	0.0160969	-0.222212	0.297353	-0.159041	-0.0442055	0.134771	0.101619	-0.0208748	0.514819	-0.164801
1618				10	-0.357432	0.212503	-0.18094	-0.928237	-0.133642	-0.471348	-0.259629	-0.100695	-0.249466	-0.210524	-0.0339901	-0.370308	-0.0247426	-0.0834484	0.0233727	-0.457317	-0.243683	0.0222707	-0.0240497	-0.000370026	0.777714	0.239326	-0.18221	0.289398	-0.285698	-0.186036	0.0480986	0.178017	0.218533	0.595957	-0.0803736
1618				11	-0.291022	0.591091	-0.219364	-1.0575	0.266991	-0.366211	-0.413165	0.0872724	0.243795	-0.147328	0.0684291	-0.0665003	0.0414606	-0.122923	0.0273787	-0.0882885	-0.202025	-0.343399	-0.136226	0.144275	0.0743935	0.10348	-0.335751	0.012827	-0.393588	-0.303305	0.000650342	0.302784	-0.0253828	-0.105161	-0.126657
1618				12	-0.278724	1.87134	-0.288965	-1.06975	1.46046	-0.38456	-0.918326	-0.15973	0.187623	-0.26877	-0.21243	0.00677956	-0.315669	-0.146785	-0.0241617	0.109301	-0.664676	0.195626	0.0563325	0.328231	-0.271229	-0.00263036	-0.221557	0.00756276	-0.173417	-0.118852	-0.575409	0.159198	0.0516604	-0.418058	-0.113766
1619				1	-0.205315	-1.60321	-0.241776	-0.805421	-1.73922	-0.061661	0.690356	0.0501501	0.766084	-0.134691	-0.436612	0.245894	-0.462893	-0.102378	-0.144331	0.670033	-0.400013	-0.424728	0.159461	0.668242	-0.329307	-0.0506629	-0.164731	0.00225773	-0.250008	-0.184692	-0.707843	0.117846	0.0400841	-0.409976	0.0440128
1619				2	-0.135599	-0.70955	-0.0495758	-0.490222	-1.41193	-0.0712605	1.19806	0.507536	1.00063	0.0111321	-0.57841	-0.324967	-0.513588	-0.0589478	-0.105883	-0.161295	-0.306563	0.077621	-0.0121895	-0.405441	-0.107396	0.0871069	-0.0210294	0.0193815	-0.0542343	-0.250933	-0.533037	0.153211	0.353509	0.0232629	0.161486
1619				3	-0.327891	1.08489	-0.238493	-0.654002	0.792572	-0.00901465	-0.704714	0.192368	1.29006	0.237363	0.530635	-0.10656	0.803054	-0.170273	0.0758827	-0.216315	0.212307	0.217482	0.117385	-0.126003	0.00281976	0.0240056	-0.106768	0.0452821	-0.241476	-0.0359046	0.0484019	0.101412	0.124195	0.206035	-0.0354326
1619				4	-0.374215	-0.527165	-0.283275	-0.618775	-0.440998	-0.12324	-0.286705	-0.179577	0.977646	0.260863	-0.588432	-0.220767	-0.430595	-0.212299	0.105906	-0.112836	-0.049837	-0.0248623	0.10705	-0.0582642	-0.148108	-0.0272401	-0.286805	-0.152064	-0.126978	-0.0381325	-0.102004	-0.0307058	-0.207995	0.0536924	-0.143412
1619				5	-0.27781	-0.502847	-0.244276	-0.343619	-0.265317	-0.173626	-0.35018	-0.105302	0.756093	0.0930137	-0.594444	-0.384659	-0.391633	-0.114409	0.100873	-0.318576	-0.0320686	0.179006	-0.122757	-0.0644913	-0.263698	-0.0989918	-0.272391	-0.0765458	-0.0904487	-0.196001	-0.153974	-0.0251918	-0.0645122	-0.0977241	-0.105646
1619				6	-0.283516	-0.629207	-0.251263	-0.660975	-0.4482	-0.159668	-0.333967	-0.510288	0.785844	0.0377549	-0.72869	-0.307798	-0.407074	-0.183128	0.112804	-0.242795	-0.113216	0.21719	-0.140395	-0.147124	-0.0669998	-0.0112615	-0.193074	0.237255	-0.157925	-0.125116	-0.0386063	0.0307448	-0.00317116	0.0349432	-0.0189833
1619				7	-0.282369	-0.985165	-0.314407	-0.289901	-0.325583	-0.138609	-0.511085	-0.172218	1.11417	0.186624	0.345773	0.238817	0.0969159	0.152012	0.0576192	0.209241	-0.114969	-0.314261	-0.10336	-0.0958865	0.119128	-0.0419102	-0.284131	0.30874	-0.144707	-0.170987	0.247586	0.0352792	-0.0564988	0.100624	-0.136296
1619				8	-0.238107	-0.733164	-0.282021	-0.757794	-0.365333	-0.340642	-0.561968	-0.481135	0.739172	-0.120022	-0.179261	-0.357794	-0.0725731	-0.0546914	-0.0529604	-0.342154	-0.0347636	-0.1935	-0.0479534	-0.0125426	0.0356754	-0.100576	-0.294404	0.123968	-0.113257	-0.165936	0.289386	-0.00643787	0.04622	0.198673	-0.174416
1619				9	-0.286633	-0.698285	-0.171154	-0.769026	-0.346346	-0.253882	-0.385963	-0.297517	-0.0529093	-0.0549869	-0.402383	-0.547956	0.0243384	-0.00216764	-0.144977	-0.601528	-0.057456	-0.0309834	-0.189248	-0.089612	0.210817	0.0192631	-0.215601	0.144092	-0.133252	-0.0784281	0.343622	0.159734	0.0513336	0.193076	0.00895112
1619				10	-0.356354	-1.06383	-0.302164	-1.35087	-0.794706	-0.189269	-0.336941	-0.37196	-0.17183	-0.157914	-0.0728762	-0.370818	-0.0208192	-0.0634365	-0.110258	-0.376108	-0.173195	0.104649	0.0589848	0.0395203	0.0505658	0.107732	-0.155031	0.0428773	-0.0694761	0.102764	-0.060029	0.200162	-0.0309826	0.27809	-0.020399
1619				11	-0.167864	-0.251042	-0.250706	-0.498069	-0.253981	-0.521518	-0.555012	-0.281417	-0.042857	-0.17339	-0.187571	-0.182207	-0.15359	-0.101362	-0.158126	0.158762	-0.415963	-0.311717	-0.204729	0.0384898	-0.354672	0.0644879	-0.262059	-0.258694	-0.202376	-0.188657	-0.252186	0.300246	-0.14689	-0.106359	-0.0705087
1619				12	-0.326855	-0.508377	-0.298378	-0.701105	-0.520463	-0.0711709	0.266815	0.0642193	0.0632349	-0.13057	-0.268943	-0.0573164	-0.230043	-0.127526	-0.234331	0.194017	-0.253051	-0.305908	-0.223416	0.286471	-0.708583	-0.326752	-0.343542	-0.385254	-0.195445	-0.111842	-0.539942	0.0795855	-0.344677	-0.394163	-0.112137
1620				1	-0.156943	-1.13439	-0.248265	-0.554357	-1.15917	-0.180598	0.598148	-0.0525087	0.813001	-0.0677999	-0.327556	-0.371557	-0.200202	-0.0869152	-0.140945	-0.420761	-0.217189	-0.405827	-0.324071	0.738029	-0.437819	-0.0907706	-0.238553	-0.318005	-0.257757	-0.314105	-0.455131	0.0833366	-0.090472	-0.193122	-0.108856
1620				2	-0.328688	0.581351	-0.189098	-0.709862	0.485615	-0.267757	-0.470372	-0.157491	1.0276	0.235623	-0.330716	-0.178866	-0.117955	-0.0534985	-0.0652358	-0.347883	0.0155268	-0.00958023	-0.0836083	-0.18625	-0.477603	-0.0715464	-0.0582513	-0.0216703	-0.187831	-0.261039	-0.409501	0.0316177	0.0345281	0.084773	0.0128826
1620				3	-0.571876	1.08946	-0.235928	-0.26793	0.592697	-0.0711704	-0.283718	-0.349367	0.85525	0.127223	-0.528243	-0.148619	-0.268767	-0.116234	-0.0252735	-0.0144502	-0.328131	0.441791	-0.43248	-0.0283613	-0.403144	-0.0903819	-0.1423	-0.107628	-0.123737	-0.190313	-0.330127	0.0593355	-0.100161	-0.0346841	0.00115986
1620				4	-0.201711	-0.922868	-0.303974	-0.215735	-0.604679	-0.225903	-0.477237	0.0619896	0.796906	0.166049	-0.551945	-0.323736	-0.272682	-0.0671551	-0.0909324	-0.206838	-0.0864047	-0.614997	0.0802082	0.0335632	-0.584241	-0.240327	-0.242669	-0.27868	-0.13527	-0.0209788	-0.297038	-0.0953821	-0.234521	0.0991216	-0.0533333
1620				5	-0.356044	0.0335405	-0.262384	-0.412368	-0.0779292	-0.488522	-0.39892	0.370923	0.446837	0.165337	-0.549594	-0.325422	-0.426496	-0.182427	0.178479	-0.392286	-0.251021	-0.400478	-0.287466	-0.255526	-0.492763	-0.13	-0.186793	0.0780142	-0.112537	-0.144557	-0.209109	-0.118356	-0.287533	0.147141	-0.115921
1620				6	-0.230873	-0.749647	-0.315625	-0.806094	-0.385597	-0.368141	-0.436933	-0.216213	0.820701	0.052699	-0.93299	-0.572631	-0.491005	-0.0563136	0.145585	-0.72992	-0.166093	-1.34233	-0.144358	-0.157052	-0.0875076	-0.0511403	-0.189117	0.333336	-0.00654688	-0.0618853	-0.1758	-0.0280702	-0.0375816	-0.0252356	-0.0736078
1620				7	-0.262909	-0.545433	-0.324309	-0.645359	-0.258467	-0.52188	-0.433677	-0.24964	1.06738	0.0101124	-0.444085	-0.561978	-0.252819	-0.154203	0.0057031	-0.570339	-0.153457	-1.01468	-0.169236	-0.0919174	-0.0783346	-0.0379791	-0.235049	0.139869	-0.187816	-0.309305	-0.0340776	0.0681485	-0.0254434	0.0619872	0.0320599
1620				8	-0.267366	-0.322699	-0.288366	-1.351	-0.281837	-0.306605	-0.458155	-0.0929742	0.656275	-0.175283	-0.490496	-0.381571	-0.366446	-0.238699	-0.0655851	-0.394521	-0.198004	-0.431501	-0.128134	-0.0121039	-0.420686	-0.0665894	-0.301385	-0.0447519	-0.212941	-0.208661	-0.0361205	0.0795797	-0.0096577	0.109648	-0.0230965
1620				9	-0.377331	-0.265306	-0.245867	-1.03704	-0.373652	-0.226173	-0.452585	-0.325883	-0.0627055	-0.167293	-0.789552	-0.17344	-0.384076	-0.123454	0.0791121	-0.155815	-0.258922	-0.350917	-0.334793	-0.166727	-0.154252	0.0343655	-0.239399	0.100326	-0.245421	-0.369168	0.0790533	0.137669	0.0932114	0.24366	-0.0194703
1620				10	-0.251988	0.0686932	-0.281759	-1.35205	-0.0467348	-0.209308	-0.467837	0.0290868	-0.197972	-0.226714	-0.129	-0.299722	-0.156392	-0.0574322	-0.0986423	-0.492096	-0.185419	0.0425792	-0.0093593	-0.0581017	-0.455709	-0.0800809	-0.219032	-0.0524787	-0.0742626	-0.0751593	0.0904703	0.054671	0.284789	0.193385	0.0286504
1620				11	-0.124031	0.367219	-0.329641	-0.922029	0.226618	-0.343991	-0.582476	-0.140661	0.372428	-0.380856	-0.478536	-0.622293	-0.299995	-0.0756742	-0.157678	-0.646324	-0.298678	-0.333672	-0.102504	0.241558	-0.338685	-0.0525947	-0.148188	-0.262514	-0.108211	-0.113463	-0.0486394	0.00889422	-0.255892	-0.176878	0.0143149
1620				12	-0.298166	1.4292	-0.458681	-0.972753	1.16637	-0.262429	-0.88335	-0.285123	-0.0132803	-0.268303	-0.42661	-0.473181	-0.536587	-0.0664947	-0.315261	-0.50083	-0.281159	0.0934917	0.0442895	0.226874	-0.377171	-0.241303	-0.286218	-0.22616	-0.0746009	-0.0885821	-0.285116	0.0376982	-0.620957	-0.144575	-0.180458
1621				1	-0.247893	-3.41262	-0.329367	-0.522925	-1.74705	-0.165544	-0.976883	-0.187346	0.294835	-0.207847	-0.425497	0.0202321	-0.278468	-0.0674507	-0.286238	0.156884	-0.386468	0.0560222	-0.158952	0.943899	-0.184794	-0.10194	-0.210427	-0.212464	-0.181688	-0.14444	-0.338054	0.0195567	-0.351426	0.00741825	-0.0723126
1621				2	-0.123631	-0.623799	-0.383459	-1.04345	-0.427875	-0.155804	-0.327952	-0.0443034	-0.0555845	-0.166436	-0.588216	-0.13002	-0.464024	-0.129432	-0.230654	0.492116	-0.39516	-0.197577	-0.286598	-0.0228755	-0.10608	-0.109392	-0.149192	-0.248868	-0.0475319	-0.191716	-0.479471	-0.0606827	-0.0877387	0.0115289	-0.104582
1621				3	-0.141259	0.693108	-0.438338	-1.27677	0.23683	-0.245121	0.0073761	0.0791794	-0.314084	-0.136656	-1.31598	-0.61371	-0.769082	-0.104243	-0.405877	0.08543	-0.375034	-0.151984	0.0462144	0.14843	0.00629304	-0.160319	-0.217017	-0.200341	0.094139	0.0287603	-0.216632	-0.0416433	-0.445915	-0.0271786	-0.0569647
1621				4	-0.276813	-0.804265	-0.371561	-0.661289	-0.637189	0.196538	-0.395272	-0.217086	-0.425781	0.0665714	-0.27932	-0.161716	-0.0165563	-0.18325	-0.525459	-0.070908	-0.169792	0.373524	-0.1741	-0.16945	-0.340378	-0.262698	-0.240993	-0.387734	-0.055098	-0.155393	-0.0709944	-0.150852	-0.0900164	-0.0579047	-0.130217
1621				5	-0.197606	-0.283926	-0.27444	-0.309188	-0.205373	-0.0933867	-0.437245	-0.0220265	-0.150056	0.0275649	-0.23789	-0.148846	-0.296388	-0.0336535	-0.456344	-0.26472	-0.152449	0.278384	-0.113972	-0.225113	-0.255723	-0.168126	-0.130757	-0.20534	-0.0913184	-0.38793	-0.084403	-0.0914359	-0.241892	-0.0570308	-0.0431018
1621				6	-0.251318	-1.38628	-0.383843	-0.682937	-0.562844	-0.346359	-0.336079	-0.120999	-0.170205	0.00104802	-0.536658	-0.496432	-0.310951	-0.0236827	-0.167044	-0.53637	-0.097175	-0.440614	-0.0815298	-0.00424716	-0.355206	-0.178393	-0.135366	0.0605811	0.0579368	-0.137128	0.0194324	0.00282122	-0.161569	-0.0424932	-0.0741476
1621				7	-0.229572	-2.30071	-0.363509	-0.481556	-0.718232	-0.238222	-0.605281	-0.0602602	0.266437	0.114732	-0.238906	-0.114233	-0.116747	0.0447869	-0.109791	0.0299527	-0.0710843	0.194976	-0.157557	-0.169567	-0.248293	-0.0568485	-0.160672	0.134664	-0.0664883	-0.151031	0.0494605	0.0278177	-0.113867	-0.0724103	-0.0600097
1621				8	-0.257909	-1.72108	-0.350134	-0.648429	-0.643218	-0.185141	-0.606009	0.0601912	0.203303	-0.0683439	-0.0859879	-0.229479	-0.0588631	-0.0258122	-0.119006	-0.117589	-0.104107	0.395892	-0.137783	-0.039975	-0.351501	-0.0630723	-0.200795	-0.00291233	-0.141145	-0.261782	0.158462	0.0488733	-0.126383	0.0857314	-0.0567116
1621				9	-0.249604	-0.637163	-0.311512	-0.381333	-0.525385	-0.0775217	-0.33933	-0.0124057	-0.183364	-0.182333	-0.47527	-0.36527	-0.219243	-0.0038194	-0.076169	-0.385264	-0.0661497	0.357303	-0.203384	-0.0713311	-0.313451	-0.0814697	-0.152931	0.0774816	0.0206738	-0.0925072	0.169525	0.0766438	-0.0542934	0.219931	-0.0034085
1621				10	-0.332898	-0.235614	-0.332855	-0.572588	-0.222664	-0.328116	-0.348708	-0.0984791	-0.16589	-0.300433	-0.669454	-0.388922	-0.507822	-0.052702	-0.210949	-0.335976	-0.239233	-0.421695	-0.123295	0.152407	-0.119051	-0.0981148	-0.242223	-0.111502	0.031105	-0.0673659	0.0776129	0.0571009	-0.311445	0.119975	-0.0541743
1621				11	-0.23678	-0.381766	-0.330919	-0.497187	-0.231607	-0.200751	-0.528811	-0.210979	0.171769	-0.346638	-0.288433	-0.330625	-0.382444	-0.05567	-0.192922	-0.287798	-0.353285	-0.19518	-0.380195	-0.336216	-0.0877044	-0.186317	-0.26318	-0.0779914	-0.0340995	-0.203731	-0.186115	0.046427	-0.145233	0.0709976	0.00195338
1621				12	-0.420112	-1.9073	-0.31823	-0.468859	-1.18792	-0.20709	-0.175565	-0.0272462	0.665244	-0.283482	-0.394285	-0.12126	-0.106477	-0.117362	-0.209899	0.0905652	-0.440778	0.0481362	-0.200637	-0.214714	-0.437155	-0.213366	-0.12939	-0.147365	-0.0507934	-0.0428591	-0.193748	7.19706e-05	-0.117329	-0.241311	-0.0427818
1622				1	-0.0100201	-2.79084	-0.325427	-0.238858	-1.56162	-0.0935159	-0.209949	-0.214812	0.341461	-0.50023	-0.779137	-0.405946	-0.60364	-0.07467	-0.327585	-0.144553	-0.528613	-0.374959	-0.147254	0.304089	-0.200906	-0.126711	-0.158282	-0.171954	0.113478	0.02417	-0.307987	-0.00183989	-0.165601	0.000208473	-0.0600522
1622				2	-0.105765	-1.73161	-0.29969	-0.343968	-0.934347	-0.348581	-0.207447	0.224407	0.255876	-0.207866	-0.407282	-0.0258441	-0.482701	-0.15331	-0.334454	0.254963	-0.484418	-0.519088	-0.371915	-0.366709	-0.307749	-0.00491123	-0.249125	-0.26043	-0.0763538	-0.345774	-0.394048	0.0627799	-0.333972	-0.0779105	-0.027908
1622				3	-0.205497	-0.725743	-0.348257	-0.505246	-0.543357	-0.154032	-0.464984	-0.0208214	0.389161	0.0368189	-1.15309	-0.805598	-0.468753	-0.0157838	-0.391629	-0.524434	0.0762121	-0.256506	-0.264115	-0.256869	-0.23747	-0.0351127	-0.199246	-0.226158	0.0455588	-0.16202	-0.293401	-0.0366308	-0.305111	0.0792209	-0.0182207
1622				4	-0.395116	-0.088916	-0.378555	-0.825992	-0.225544	0.177184	-0.27688	0.218267	0.254073	-0.0173157	-0.606719	-0.221047	-0.458498	-0.143478	-0.540498	-0.160662	-0.238922	-0.155283	-0.0818039	-0.114005	-0.348792	-0.22383	-0.23175	-0.325122	-0.00687065	-0.0592059	-0.251721	-0.1571	-0.414151	-0.0100436	-0.126333
1622				5	-0.31799	-0.00917937	-0.335704	-0.025646	-0.102482	-0.188658	-0.441544	-0.377973	-0.163491	-0.177778	-0.460674	-0.119816	-0.204435	-0.16021	-0.417108	0.0839913	-0.287308	-1.20119	-0.147936	-0.219099	-0.441539	-0.262946	-0.265157	-0.348814	0.0301606	-0.125748	-0.323461	-0.177568	-0.542242	-0.0459415	-0.236244
1622				6	-0.261308	-0.49361	-0.410143	-0.534591	-0.392545	-0.529149	-0.405043	-0.236067	0.0343083	-0.130763	-0.0909428	0.0956537	-0.0672356	-0.153052	-0.29509	0.209404	-0.214746	-0.556245	-0.316032	-0.37391	-0.21019	-0.139155	-0.176708	-0.159357	-0.0541495	-0.282705	-0.122024	-0.0628316	-0.311291	-0.251155	-0.169658
1622				7	-0.284017	-0.709936	-0.480027	-0.0431286	-0.324008	-0.233538	-0.505527	-0.189185	-0.0867825	-0.17388	0.403302	0.367576	0.136221	-0.251401	-0.229181	0.397651	-0.304565	-0.94341	-0.148639	0.000333468	-0.352342	-0.18527	-0.141657	-0.177321	0.0213013	0.115989	-0.175298	-0.0367118	-0.289561	-0.0578649	-0.11793
1622				8	-0.222816	-0.740052	-0.396641	-0.357568	-0.370252	-0.227476	-0.383469	-0.0909884	-0.104263	-0.0597799	-0.164456	-0.0996937	-0.179844	-0.173412	-0.214396	-0.00355387	-0.215557	-0.189414	-0.37657	-0.0389632	-0.420406	-0.109381	-0.168641	-0.0272253	-0.0126083	-0.14154	-0.0547572	-0.0412756	-0.154985	-0.0318471	-0.0949863
1622				9	-0.32625	-0.286505	-0.299503	-0.450361	-0.203522	-0.030888	-0.375593	-0.252252	-0.20557	-0.186506	0.509671	0.181347	0.0114543	-0.0959443	-0.110902	0.0156713	-0.202067	0.0303017	-0.43123	-0.307004	-0.609601	-0.131273	-0.206755	-0.240931	-0.0185632	-0.273525	-0.0183836	-0.0502349	0.0970757	-0.0147834	-0.167883
1622				10	-0.303238	0.15025	-0.283582	-0.762728	0.0101242	-0.332959	-0.253932	-0.195209	-0.119999	-0.10685	-0.772727	-0.412381	-0.693755	-0.142883	-0.224783	-0.358865	-0.156748	-0.48454	-0.428614	-0.230717	-0.339207	-0.0662717	-0.13953	-0.135048	-0.0729904	-0.244298	0.588307	0.00129191	0.000219727	0.194985	-0.130043
1622				11	-0.197731	0.135993	-0.373337	-1.00649	0.0659553	-0.268201	-0.27936	-0.160063	-0.186547	-0.349625	-0.527168	-0.528684	-0.433126	-0.0833895	-0.382512	-0.571027	-0.141349	-0.449401	-0.328588	-0.370512	-0.530925	-0.189512	-0.264557	-0.244921	0.0604134	0.023437	0.0258674	0.0191004	-0.170923	0.029158	-0.044832
1622				12	-0.158651	0.989354	-0.432621	-0.775126	0.824947	-0.147014	-0.772731	-0.627075	0.171008	-0.39218	-0.309408	-0.255534	-0.23781	-0.117709	-0.33377	-0.260341	-0.219909	-1.21091	-0.13548	0.00828374	-0.436192	-0.24489	-0.241827	-0.197363	2.21888e-05	-0.162249	-0.040775	-0.0513044	-0.235718	-0.15384	-0.190083
1623				1	-0.0811527	1.19057	-0.34924	-0.0986271	1.25761	-0.0509241	-1.51344	-0.108614	-0.21192	-0.348033	-0.436601	-0.168116	-0.41405	-0.122649	-0.354585	0.00423292	-0.40317	-0.281429	-0.00919476	-0.236832	-0.105401	-0.164539	-0.170163	-0.321942	0.217495	0.0803233	-0.0496667	0.0139415	-0.607474	-0.243026	-0.0858452
1623				2	-0.241734	1.55729	-0.391966	-1.60249	1.37215	-0.151057	-1.13754	-0.365558	-0.298235	-0.167037	-0.884821	-0.510267	-0.535411	-0.148044	-0.430604	-0.278144	-0.48863	0.23262	-0.261041	-0.250297	-0.350386	-0.207195	-0.195302	-0.339126	-0.201276	-0.67624	-0.103403	0.026733	-0.596471	0.0160093	-0.101434
1623				3	-0.330003	0.90412	-0.551733	-1.14863	0.401024	-0.0829091	-0.480562	-0.04612	-0.0377151	-0.0773855	-2.00368	-0.708866	-1.21436	-0.181414	-0.457805	-0.126614	-0.463749	-0.31579	-0.0494677	-0.123837	-0.382804	-0.222821	-0.210084	-0.421166	0.177078	0.0147451	-0.218991	-0.0445368	-0.549605	0.0283061	-0.0385988
1623				4	-0.279788	-0.0426118	-0.528684	-0.479988	-0.0808394	-0.011586	-0.259637	0.229525	0.0032486	-0.02826	-0.508356	-0.184823	-0.286066	-0.150502	-0.462247	-0.281685	-0.184929	0.344622	-0.125299	-0.0946288	-0.337239	-0.276834	-0.210019	-0.378236	0.157232	0.0759364	-0.240653	-0.313861	-0.528552	-0.073482	-0.161457
1623				5	-0.313422	-1.5668	-0.457855	-0.666412	-0.580662	-0.0177014	-0.168471	-0.100011	-0.180419	-0.0638257	-0.251245	-0.135668	-0.286521	-0.160656	-0.367105	-0.373322	-0.313877	-0.633624	-0.1171	-0.0459328	-0.424851	-0.290163	-0.18575	-0.459847	-0.0168813	-0.0416748	-0.100364	-0.181144	-0.477781	-0.0350849	-0.12821
1623				6	-0.237709	-0.424581	-0.501051	-0.405362	-0.32867	-0.232631	-0.417992	-0.00645422	-0.483083	-0.149425	-0.454501	-0.314047	-0.206617	-0.144771	-0.242503	-0.307287	-0.207134	-0.587524	-0.0106032	-0.0298485	-0.463278	-0.263575	-0.222909	-0.36789	0.00172243	-0.0344929	-0.156948	-0.118337	-0.362314	-0.118968	-0.0507101
1623				7	-0.296755	-0.124846	-0.507512	-0.743947	-0.232776	-0.147082	-0.396928	-0.467735	-0.467482	-0.210801	-0.283536	-0.516537	-0.252983	-0.138774	-0.219099	-0.483783	-0.203027	-1.01161	-0.165888	-0.167263	-0.364906	-0.223305	-0.156498	-0.427958	-0.000732422	-0.243275	-0.0899286	-0.085826	-0.342002	-0.314136	-0.143573
1623				8	-0.258369	0.298013	-0.510643	-0.745277	-0.201985	-0.128122	-0.305796	-0.130969	-0.350426	-0.231724	-0.204295	-0.221568	-0.17282	-0.302141	-0.283404	-0.143481	-0.21254	0.131604	-0.27457	-0.175318	-0.689552	-0.14175	-0.152709	-0.313303	0.0428011	-0.0461189	-0.0642481	-0.0877825	-0.1739	-0.157599	-0.130185
1623				9	-0.275813	-0.231899	-0.428921	-0.976826	-0.363394	-0.0868887	-0.328901	-0.114928	-0.26905	-0.127703	0.180776	-0.183704	-0.046924	-0.140592	-0.219872	-0.22965	-0.210328	-1.43646	-0.350552	-0.199301	-0.913277	-0.165031	-0.195539	-0.178376	-0.0155477	-0.154624	-0.12986	0.00800215	-0.289595	-0.176101	-0.0706635
1623				10	-0.264237	0.136362	-0.353635	-0.751684	-0.106782	-0.192134	-0.200757	-0.0961154	-0.15598	-0.169142	-0.733028	-0.276579	-0.554879	-0.142591	-0.300182	-0.337689	-0.233708	-0.303284	-0.281012	-0.130339	-1.02242	-0.175288	-0.130779	-0.308435	0.126896	0.0230596	0.164525	0.0609042	-0.273584	-0.00620791	-0.0695304
1623				11	-0.250925	-0.830777	-0.354464	-0.615312	-0.506264	-0.236984	-0.428486	-0.283928	-0.385911	-0.40379	-0.213684	-0.174254	-0.398527	-0.11339	-0.380668	-0.118163	-0.38762	-0.359768	-0.38837	-0.125612	-0.920504	-0.248952	-0.206129	-0.452406	0.10333	-0.213654	-0.259186	-0.0242116	-0.344646	0.0803455	-0.0392377
1623				12	-0.0305155	-0.0869922	-0.354273	-0.164538	0.108506	-0.386916	-0.499196	-0.288767	-0.168819	-0.305716	-0.287498	-0.121663	-0.0851004	-0.169888	-0.428728	-0.01933	-0.343835	-0.801333	-0.0586825	0.0670186	-0.657225	-0.276871	-0.105894	-0.513533	0.142463	0.0892562	-0.384859	0.0319037	-0.377058	-0.00829258	-0.12763
1624				1	-0.023835	-5.07195	-0.349002	-0.0071583	-2.80617	-0.261721	-0.889598	-0.680482	-0.338273	-0.276424	-0.481712	-0.0745746	-0.373881	-0.101388	-0.429212	-0.00783297	-0.475768	-0.837866	-0.245647	0.345205	-0.469924	-0.0901927	-0.112687	-0.392659	0.282738	0.0525438	-0.359973	-0.0400803	-0.453372	0.0317503	-0.0737126
1624				2	-0.19793	-2.36054	-0.392454	-0.0548682	-1.38996	-0.010252	-0.597897	-0.178275	-0.221619	-0.102824	-0.462363	0.0344415	-0.394817	-0.200513	-0.471301	0.333152	-0.407597	-0.339268	-0.283188	-0.371323	-0.54912	-0.181537	-0.0805291	-0.321271	-0.0848167	-0.452707	-0.297624	-0.00755355	-0.427617	-0.0725012	-0.124529
1624				3	-0.178521	0.194245	-0.432604	-0.274755	0.0769571	-0.168852	-0.196759	-0.0638779	0.192908	-0.0600801	-1.92627	-0.88344	-1.12427	-0.122468	-0.490747	-0.577873	-0.383308	-0.137898	-0.39209	-0.0338774	-0.421163	-0.224455	-0.0792967	-0.308529	0.0739936	0.00811227	-0.432261	-0.117497	-0.244522	-0.0250958	-0.0550821
1624				4	-0.377011	1.55086	-0.596399	-0.333594	0.628824	-0.0650962	-0.320256	-0.441754	-0.036615	0.094516	-0.502755	-0.0829881	-0.378314	-0.242465	-0.527919	-0.0634027	-0.224455	-0.413112	-0.374864	-0.203253	-0.596802	-0.382859	-0.220603	-0.404507	0.130119	-0.0128382	-0.370637	-0.228252	-0.291282	-0.138517	-0.245449
1624				5	-0.233649	-0.056557	-0.418294	-0.313113	-0.194053	-0.247954	-0.293703	-0.0348951	0.0548887	0.00863641	-0.452491	-0.00709184	-0.141818	-0.0352328	-0.49636	0.0820315	-0.286602	-1.2031	-0.322067	-0.101275	-0.30164	-0.260622	-0.140109	-0.33495	0.112337	-0.0494024	-0.124709	-0.108224	-0.399784	-0.0245563	-0.122495
1624				6	-0.126415	-0.566712	-0.48028	-0.116194	-0.281826	-0.333849	-0.47459	0.164288	0.0444859	-0.105319	-0.67153	-0.173705	-0.178537	-0.108255	-0.312178	-0.122825	-0.174013	-1.10083	-0.0582297	-0.0953841	-0.300257	-0.209036	-0.142259	-0.438244	0.199445	0.0236183	-0.0586697	-0.084501	-0.380291	0.049296	-0.0862574
1624				7	-0.254625	-0.0712091	-0.574674	-0.269758	-0.187228	-0.313845	-0.470517	-0.0806651	-0.0129567	-0.123732	-0.371815	-0.216412	-0.0790218	-0.0507713	-0.176811	-0.267127	-0.16167	-1.35282	-0.0196207	0.0754849	-0.423763	-0.186691	-0.124463	-0.60032	0.261783	0.0883377	0.0645743	-0.0754653	-0.148695	0.00970294	-0.0703533
1624				8	-0.230989	-0.00572424	-0.501388	-0.594875	-0.152447	-0.295715	-0.40324	0.215837	-0.0667285	-0.119215	-0.533492	-0.234267	-0.155768	-0.0471841	-0.360112	-0.111353	-0.150614	-1.56569	-0.1547	-0.109812	-0.627548	-0.211264	-0.0907241	-0.355167	0.278802	0.139928	0.0860681	-0.114432	-0.249755	-0.0525457	-0.119187
1624				9	-0.328925	0.0869291	-0.360411	-0.568398	-0.132683	-0.156044	-0.262302	-0.469467	-0.356201	-0.120998	-0.396363	-0.211473	-0.126399	-0.114728	-0.286935	-0.119784	-0.235116	0.06632	-0.196252	0.0121355	-0.492285	-0.229743	-0.132324	-0.309224	0.116179	-0.0198077	0.290864	-0.0167953	-0.22658	0.0859952	-0.124544
1624				10	-0.245268	0.262322	-0.374238	-0.372292	-0.00949284	-0.0875829	-0.232466	-0.265049	-0.352971	-0.167094	-0.519421	-0.258147	-0.569857	-0.139393	-0.25066	-0.28493	-0.338734	0.0972295	-0.0687847	-0.0125561	-0.386505	-0.185519	-0.150156	-0.177809	0.108548	-0.0116722	0.114633	-0.15907	-0.227136	-0.0407767	-0.0850867
1624				11	-0.0646002	0.0683532	-0.267307	-0.488659	-0.0258072	-0.37086	-0.428998	-0.227071	0.0908653	-0.264116	-0.373848	-0.166773	-0.376665	-0.123394	-0.341686	-0.137134	-0.277062	-0.321287	-0.222694	-0.25962	-0.380122	-0.184833	-0.173083	-0.121693	0.0789395	-0.101877	0.197534	-0.0311296	-0.54245	0.109148	-0.067003
1624				12	-0.15053	0.722811	-0.368814	-0.573654	-0.146003	0.0142826	0.999794	-0.210024	0.0571066	-0.257071	-0.381804	-0.362272	-0.449787	-0.150403	-0.396797	-0.276587	-0.477757	-0.875428	-0.166469	-0.0855015	-0.492881	-0.234778	-0.198707	-0.232786	0.160007	0.279023	0.0109637	-0.0375448	-0.581967	-0.0793566	-0.0954475
1625				1	-0.0704983	4.38349	-0.416464	-0.854191	1.67143	-0.434893	0.375616	-0.593479	-0.162364	-0.373243	-0.567186	-0.350502	-0.453135	-0.125602	-0.444	-0.351698	-0.485166	-0.708672	-0.00914516	-0.0725767	-0.370397	-0.106987	-0.150901	-0.387906	0.197666	0.117521	-0.0762952	-0.00578047	-0.537265	-0.0658316	-0.139518
1625				2	-0.116041	3.82568	-0.385139	-0.787656	2.18037	0.137101	-0.0303739	-0.302593	-0.28097	-0.202611	-0.630094	-0.283752	-0.519587	-0.132512	-0.516343	-0.155737	-0.331191	0.0845082	-0.458656	-0.201953	-0.108174	-0.0854433	-0.145955	-0.329888	0.00702019	-0.422134	0.0857588	-0.0634885	-0.496615	-0.0711985	-0.0813004
1625				3	-0.180762	0.538366	-0.425307	-0.76286	0.121527	0.147963	0.00501003	-0.455169	-0.0139304	-0.0727011	0.892256	0.21041	0.810586	-0.195759	-0.488166	0.101829	0.0538179	-0.098561	-0.223296	0.0780821	-0.0729287	-0.0986064	-0.0941187	-0.372769	0.0888442	-0.0736348	0.0841952	-0.0636446	-0.290835	-0.0244397	-0.0875929
1625				4	-0.0541812	-0.00040315	-0.421724	0.382325	-0.0427244	-0.212666	-0.369305	-0.149485	-0.386339	0.0107433	-0.683916	-0.419553	-0.24652	-0.251958	-0.576606	-0.287015	-0.151253	-1.63708	-0.303707	-0.164963	-0.369378	-0.308847	-0.20316	-0.358172	0.0295673	-0.119796	-0.181317	-0.231908	-0.383279	-0.161418	-0.172833
1625				5	-0.329276	-1.44865	-0.388055	0.0112946	-0.539227	-0.136931	-0.296637	0.172451	-0.368341	-0.0927983	-0.547464	-0.101796	-0.230451	-0.274044	-0.249446	-0.281109	-0.187184	-1.80968	-0.120279	-0.119625	-0.257203	-0.253491	-0.145413	-0.32478	0.0779015	0.0105084	-0.272733	-0.193101	-0.572174	-0.195964	-0.20326
1625				6	-0.286958	-0.66396	-0.397215	-0.106919	-0.302696	-0.261264	-0.226824	-0.323044	-0.552547	-0.217631	-0.271254	-0.239332	-0.11507	-0.129956	-0.306763	-0.197937	-0.36485	-1.99473	-0.20825	-0.0924	-0.30263	-0.230624	-0.116847	-0.112301	0.26283	0.249757	-0.369442	-0.156952	-0.31461	-0.247014	-0.189506
1625				7	-0.206018	-1.01525	-0.419503	0.0410156	-0.278021	-0.339616	-0.485912	-0.390113	-0.536146	-0.120474	-0.794579	-0.44175	-0.458796	-0.239231	-0.236177	-0.182531	-0.231241	-0.911837	-0.45376	-0.262777	-0.339296	-0.26009	-0.189738	-0.56461	0.0528908	-0.109114	-0.274768	-0.169036	-0.320831	-0.326757	-0.239259
1625				8	-0.225972	-1.09839	-0.462269	-0.101835	-0.373367	-0.303346	-0.48686	-0.159415	-0.465036	-0.272737	-0.0705555	-0.130759	-0.0596756	-0.26865	-0.419185	-0.0703568	-0.283446	-0.232093	-0.412336	-0.227808	-0.58881	-0.213903	-0.0777178	-0.347837	0.0900595	-0.0274698	-0.279595	-0.135048	-0.285539	-0.238619	-0.122408
1625				9	-0.257782	-1.06667	-0.478697	-0.455562	-0.514681	-0.259102	-0.376772	-0.299152	-0.388862	-0.249815	-0.112687	-0.306287	0.165648	-0.243503	-0.376347	-0.165186	-0.202065	-0.868582	-0.233943	-0.0576516	-0.616883	-0.25393	-0.164515	-0.446311	0.174824	-0.0885504	-0.00638447	-0.105382	-0.0402287	-0.217813	-0.108982
1625				10	-0.199175	-0.222553	-0.425823	-0.522856	-0.12011	-0.0684503	-0.277117	-0.053614	-0.35896	-0.395688	-0.910664	-0.471764	-0.853228	-0.17757	-0.246378	-0.257699	-0.293795	-0.565259	-0.460373	-0.270063	-0.708185	-0.358209	-0.236942	-0.504173	0.186564	0.060355	0.0571127	-0.178724	-0.340746	-0.0839781	-0.106396
1625				11	-0.0135138	0.0622202	-0.433847	-0.459656	0.0273611	-0.21989	-0.245595	-0.561071	-0.484595	-0.381256	-0.44823	-0.277708	-0.33286	-0.128939	-0.310626	-0.225171	-0.246939	-0.8071	-0.396364	-0.20944	-0.63839	-0.318817	-0.232256	-0.448725	0.196728	0.22362	-0.278563	-0.215887	-0.427568	-0.0189568	-0.0179212
1625				12	-0.132076	-0.532488	-0.472082	-0.541118	-0.552374	-0.0647133	0.253692	-0.454328	-0.121631	-0.330515	-0.169583	-0.0756163	-0.139254	-0.17163	-0.387679	-0.0516357	-0.321925	-0.267496	-0.380225	-0.360847	-0.522631	-0.299259	-0.195407	-0.54738	0.216235	0.124917	-0.0569265	-0.0523324	-0.639433	0.0098196	-0.1287
1626				1	0.0744869	1.30956	-0.348967	-0.388753	0.399487	-0.384783	0.233402	-0.19589	-0.192275	-0.138603	-0.21497	-0.209679	-0.0546474	-0.162128	-0.351019	0.058228	-0.227496	-0.844555	-0.452421	-0.334598	-0.40018	-0.201187	-0.251912	-0.423102	0.0532247	-0.0307072	-0.0416578	-0.149713	-0.530488	-0.0652632	-0.226529
1626				2	0.0872458	3.96919	-0.285933	-0.494073	2.31527	-0.802162	-0.52942	-0.305429	-0.428036	-0.192239	-0.264269	-0.457448	-0.0225756	-0.133123	-0.234814	-0.639631	-0.258856	-0.103408	-0.231544	-0.134858	-0.2302	-0.248642	-0.176227	-0.276299	0.0470154	-0.190991	0.0413404	-0.215659	-0.28702	-0.10617	-0.136858
1626				3	-0.193936	1.13383	-0.536721	-0.872012	0.562866	0.389296	-0.176733	-0.0233387	-0.353053	-0.146548	0.174221	-0.222817	0.248671	-0.149348	-0.381564	-0.222163	-0.0852374	-0.508186	-0.322684	-0.261095	-0.24834	-0.249396	-0.114773	-0.348028	0.134405	0.0417503	-0.321565	-0.262997	-0.489557	-0.283152	-0.0714643
1626				4	-0.326486	-0.386149	-0.420759	-0.804777	-0.329208	0.00257142	-0.249075	-0.232024	-0.468015	-0.148095	-0.788841	-0.469972	-0.485443	-0.213851	-0.460805	-0.350741	-0.352722	-2.71196	-0.357441	-0.191136	-0.381556	-0.309709	-0.230132	-0.38844	0.12589	-0.0442446	-0.25027	-0.273076	-0.344983	-0.248884	-0.201115
1626				5	-0.30087	-0.652851	-0.483472	-0.444688	-0.343997	-0.289502	-0.127056	-0.109267	-0.275683	-0.149113	-0.696209	-0.143283	-0.433044	-0.195471	-0.386726	-0.175284	-0.4026	-2.17764	-0.260945	-0.112344	-0.370606	-0.274903	-0.131797	-0.3127	0.12792	-0.12579	-0.0496301	-0.268808	-0.460669	-0.0861713	-0.178607
1626				6	-0.126886	-0.830816	-0.470124	-0.305358	-0.375091	-0.405674	-0.209404	0.0511629	-0.395791	-0.227561	-0.672068	-0.381201	-0.33498	-0.192664	-0.251568	-0.34457	-0.321754	-1.08501	-0.255138	-0.304052	-0.353724	-0.24372	-0.219789	-0.460652	0.114289	0.0547329	-0.0721737	-0.192463	-0.400753	-0.11972	-0.188854
1626				7	-0.217983	-1.11422	-0.467631	-0.345517	-0.418252	-0.251045	-0.560483	-0.100684	-0.247263	-0.287691	-0.883626	-0.381564	-0.415285	-0.222242	-0.36421	-0.383099	-0.237945	-0.902266	-0.336847	-0.0811981	-0.275655	-0.174505	-0.131259	-0.351674	0.0749846	0.0315349	0.00636012	-0.176816	-0.310304	-0.167949	-0.125497
1626				8	-0.237987	-0.570059	-0.441416	-0.716861	-0.470158	-0.0423029	-0.28509	-0.463588	-0.170874	-0.323099	0.0593502	-0.0854725	-0.0645432	-0.341972	-0.439984	-0.131158	-0.276659	-1.78074	-0.263577	-0.166224	-0.707399	-0.228254	-0.0820952	-0.44877	0.0139563	-0.108645	-0.1417	-0.0788733	-0.32169	-0.185497	-0.107516
1626				9	-0.293591	0.0351646	-0.354618	-0.68896	-0.181012	0.011438	-0.0673483	-0.193495	-0.211441	-0.29314	-0.0738438	-0.242336	-0.0652154	-0.116454	-0.34245	-0.244186	-0.167315	-0.34953	-0.171775	-0.0130549	-0.689589	-0.264423	-0.101124	-0.287678	0.114608	0.0622617	-0.136603	-0.151027	0.000647736	-0.0606246	-0.093155
1626				10	-0.177807	0.577878	-0.357927	-0.745882	0.0945454	-0.00205975	0.063371	0.119982	-0.288285	-0.485219	-1.07266	-0.408688	-1.04882	-0.189705	-0.282598	-0.183249	-0.342242	-0.327697	-0.311407	-0.141711	-0.495071	-0.255042	-0.130081	-0.0652561	0.192802	0.0879238	-0.0456018	-0.142282	-0.161464	-0.153472	-0.116913
1626				11	-0.161284	0.249599	-0.397629	-0.410654	0.106951	-0.153836	-0.327471	-0.222385	-0.346499	-0.249695	-0.28929	-0.313525	-0.242736	-0.12278	-0.208621	-0.274663	-0.174191	0.108529	-0.221159	-0.175986	-0.116278	-0.250122	-0.182478	-0.1131	0.0812121	0.0164151	-0.16046	-0.126135	-0.359663	-0.0249229	-0.0659635
1626				12	-0.228802	2.04863	-0.308176	0.0234754	1.32535	-0.206356	0.190187	0.0174769	0.280408	-0.168905	-0.156115	0.019922	-0.0933268	-0.11328	-0.277183	-0.19165	-0.366231	-0.657968	-0.211085	-0.0787514	-0.338566	-0.175186	-0.118692	-0.192224	0.0388825	-0.00379283	-0.327354	-0.0801015	-0.293701	0.127257	-0.0358753
1627				1	-0.121962	-3.18385	-0.434006	-0.554061	-2.07408	0.296037	0.112942	-0.329249	-0.0488402	-0.391599	-0.22583	-0.0345493	-0.305099	-0.193727	-0.377214	0.292144	-0.588592	0.561265	-0.307397	0.0684794	-0.135844	-0.148083	-0.198388	-0.236527	0.136698	0.0442497	-0.360711	-0.101915	-0.598296	-0.123119	-0.0955365
1627				2	0.0721396	-1.05104	-0.279348	-0.490055	-0.202105	-0.142682	-0.912743	0.037179	-0.118872	-0.322385	-0.731475	-0.258873	-0.769526	-0.135762	-0.474013	-0.0173897	-0.593103	-0.582776	-0.42209	-0.346947	0.05059	-0.274822	-0.235557	-0.3681	0.0839054	-0.107286	-0.294456	-0.151553	-0.460309	-0.283904	-0.193165
1627				3	-0.025777	-0.17109	-0.412196	-0.440874	0.191199	-0.192429	-0.681514	-0.211073	-0.433276	-0.230277	-0.717865	-0.369256	-0.372593	-0.149651	-0.52725	-0.294576	-0.336882	-0.123836	-0.216689	-0.229621	0.0292899	-0.260557	-0.29136	-0.418961	0.0460223	-0.0698716	-0.0474748	-0.254584	-0.591791	-0.201108	-0.192102
1627				4	-0.194028	-1.34064	-0.436422	-0.517704	-0.782624	0.052199	-0.572125	-0.58826	-0.482246	-0.072274	-0.800145	-0.239917	-0.326474	-0.135352	-0.546114	-0.0858328	-0.092285	-1.05059	-0.207224	-0.242705	-0.119094	-0.149059	-0.111476	-0.420758	0.133718	-0.0649823	0.0791979	-0.146423	-0.448089	-0.16299	-0.094431
1627				5	-0.249984	-2.46415	-0.37528	-0.560821	-0.815385	-0.0885775	-0.412979	0.127254	-0.432603	-0.115965	-0.178679	0.136106	-0.239522	-0.107424	-0.283916	0.0678156	-0.323206	-0.935503	-0.0965804	-0.250931	0.00882632	-0.167916	-0.141208	-0.362976	0.0261103	0.0234984	-0.210942	-0.196771	-0.570328	-0.125898	-0.15871
1627				6	-0.101791	-1.77646	-0.332121	-0.369637	-0.480982	-0.327449	-0.445553	0.181654	-0.50426	-0.127723	-0.552117	-0.129402	-0.273086	-0.119128	-0.408234	-0.183702	-0.222392	-0.454024	-0.179773	-0.190674	-0.131398	-0.275689	-0.135223	-0.514448	0.0670119	-0.147078	-0.145498	-0.202329	-0.323135	-0.012834	-0.221528
1627				7	-0.282621	-1.03707	-0.470462	-0.401908	-0.448465	-0.390489	-0.372365	-0.34701	-0.42651	-0.121458	-0.374758	-0.272847	-0.294644	-0.220312	-0.349319	-0.333266	-0.205459	-0.491847	-0.282226	-0.028868	-0.398288	-0.246761	-0.159688	-0.477853	-0.0558605	-0.233323	-0.0707807	-0.19147	-0.321436	-0.261329	-0.184872
1627				8	-0.265075	-0.966482	-0.474743	-0.397505	-0.461808	-0.122618	-0.62562	-0.239736	-0.289743	-0.122995	0.00857468	0.0146042	0.0280949	-0.149441	-0.363166	0.0658431	-0.231535	-0.117715	-0.32198	-0.2845	-0.49229	-0.222485	-0.0854903	-0.214752	0.0786583	-0.0231506	0.0265836	-0.186991	-0.4549	-0.203657	-0.162918
1627				9	-0.32923	-1.38607	-0.347078	-0.183448	-0.702057	-0.16964	-0.467808	-0.24776	-0.341682	-0.149383	-0.283143	-0.173677	0.0392577	-0.170304	-0.317262	-0.118353	-0.173116	0.728811	-0.15893	-0.12239	-0.737117	-0.240855	-0.0925617	-0.220112	0.0852033	0.0232536	0.0897593	-0.159478	-0.433438	-0.076961	-0.189289
1627				10	-0.207095	0.837146	-0.332607	-0.493925	0.664119	-0.08409	-0.697348	0.192711	-0.341256	-0.188645	-0.740414	-0.0532816	-0.851706	-0.214239	-0.339367	0.0769412	-0.350424	0.0105205	-0.00434297	-0.20988	-0.834871	-0.3455	-0.213052	-0.357161	0.127573	-0.0594342	0.16644	-0.186004	-0.253038	0.0328222	-0.123842
1627				11	-0.100062	0.304456	-0.320335	-0.265242	0.323451	-0.279851	-0.250926	-0.234427	0.115945	-0.315045	-0.10393	-0.178139	-0.156423	-0.117535	-0.260188	-0.183334	-0.20328	-0.211897	0.140454	-0.150459	-0.35847	-0.207855	-0.105727	-0.153143	0.0889369	-0.0873981	-0.0948907	-0.158333	-0.189628	-0.2127	-0.0357988
1627				12	-0.181383	0.26961	-0.456139	0.0338679	-0.353368	-0.200496	0.965782	-0.268214	-0.195194	-0.267675	-0.47428	-0.655723	-0.0729343	-0.125531	-0.369642	-0.799983	-0.00827675	-0.292563	-0.16788	-0.0928811	-0.369523	-0.317297	-0.117847	-0.245077	0.19341	0.113672	-0.0726049	-0.170741	-0.592531	-0.0935987	-0.0751476
1628				1	0.0552227	0.79856	-0.319646	-0.304632	0.465737	-0.270654	-0.133084	-0.311105	0.0321821	-0.110574	-0.0925146	-0.414581	0.145818	-0.129285	-0.337427	-0.678702	0.0152371	-0.11004	-0.173997	0.0182198	-0.388612	-0.320644	-0.282868	-0.225272	0.02907	0.0989581	-0.0819143	-0.193662	-0.279958	0.128707	-0.214788
1628				2	0.161234	2.05969	-0.126036	-0.434393	1.2659	-0.383836	-0.0825351	-0.445805	0.222547	-0.133277	0.0209319	0.240266	0.0415624	-0.086366	-0.185981	0.287697	-0.186219	-0.290854	-0.0451924	0.0984166	-0.372607	-0.203604	-0.129617	-0.120833	0.0363533	0.188306	0.018498	-0.209952	-0.0630862	-0.0468207	-0.138256
1628				3	-0.184743	1.20459	-0.352932	-0.63698	0.681043	0.0469155	0.0943378	-0.164005	0.131106	-0.11625	-0.303662	-0.198445	-0.10566	-0.120987	-0.376285	-0.10871	-0.206722	0.170325	-0.125317	-0.112522	-0.327783	-0.153441	-0.0721842	-0.189533	0.021942	-0.00789038	-0.0867032	-0.167151	-0.462654	0.0204574	-0.112745
1628				4	-0.0738231	-1.84774	-0.266895	-0.361617	-0.897004	-0.0305638	-0.355281	-0.415779	-0.026918	-0.0264309	-0.65775	-0.147722	-0.275421	-0.243463	-0.392009	-0.0308218	-0.198862	-1.47206	-0.326433	-0.370932	-0.474429	-0.2161	-0.0988228	-0.233739	-0.0941929	-0.471316	-0.264916	-0.21334	-0.28234	-0.113491	-0.140665
1628				5	-0.247846	-1.75004	-0.291362	0.561712	-0.432419	-0.0722063	-0.40966	-0.303947	0.0428018	-0.0613728	0.0767343	-0.0469058	-0.138646	-0.0231002	-0.458097	-0.0328142	-0.216675	-1.10925	-0.038288	-0.0908547	-0.40882	-0.173962	-0.0837564	-0.263432	-0.116508	-0.195223	0.0779124	-0.166131	-0.248074	0.0292958	-0.0975738
1628				6	-0.252052	-2.33031	-0.297709	0.256515	-0.636444	-0.157972	-0.515541	-0.408231	0.135356	-0.0702792	-0.238608	-0.134085	-0.144348	-0.0991508	-0.201913	-0.168712	-0.174346	-1.30525	-0.203176	-0.183759	-0.339604	-0.182519	-0.192668	-0.392967	0.012868	-0.206242	0.212714	-0.15975	-0.382882	-0.0649809	-0.188054
1628				7	-0.139168	-2.33531	-0.352426	0.00979417	-0.744725	-0.228121	-0.734758	-0.300182	-0.0253907	-0.113703	-0.0225665	-0.249024	-0.162485	-0.0722041	-0.293619	-0.359806	-0.152704	-0.510566	-0.381064	-0.202679	-0.344934	-0.218401	-0.149916	-0.475415	-0.102043	-0.27909	0.231927	-0.198764	-0.354349	-0.0199125	-0.21408
1628				8	-0.165717	-1.32131	-0.327747	-0.427288	-0.642267	-0.0527589	-0.351032	-0.305976	0.0882951	-0.10116	-0.377845	-0.184502	-0.285647	-0.165283	-0.151238	-0.174581	-0.181155	-0.220373	-0.241031	-0.236771	-0.608734	-0.18899	-0.179999	-0.382479	-0.014756	-0.15113	0.239032	-0.183718	-0.350805	-0.0143224	-0.19085
1628				9	-0.196673	-1.36743	-0.330599	-0.736983	-0.636683	-0.223563	-0.426575	-0.164284	-0.215255	-0.0941257	-0.132653	-0.10667	0.0145041	-0.106572	-0.10506	-0.155413	-0.135695	-0.170286	-0.406946	-0.320989	-0.553538	-0.186961	-0.10743	-0.141547	0.0505744	-0.0867966	0.155984	-0.213237	0.0682823	0.0953737	-0.236992
1628				10	-0.187037	-0.126676	-0.314954	-0.494878	0.0561505	-0.234485	-0.370789	0.212749	-0.332955	-0.357976	-1.16707	-0.463171	-0.991002	-0.184187	-0.241381	-0.354283	-0.249043	-0.1334	-0.180984	-0.28727	-0.51837	-0.209363	-0.150663	0.0722848	-0.072257	-0.0821612	0.0946722	-0.15417	-0.108682	0.165991	-0.122188
1628				11	-0.212631	1.0098	-0.343784	-0.737042	0.730796	-0.245289	-0.645014	-0.392878	-0.717019	-0.247458	-0.25378	-0.271413	-0.304136	-0.151207	-0.315261	-0.198374	-0.246998	0.270144	-0.296575	-0.0814166	-0.427743	-0.30495	-0.160569	-0.335821	-0.0368509	-0.0957714	-0.0935555	-0.277672	-0.196562	0.0586761	-0.0549409
1628				12	-0.140285	2.91562	-0.330736	-0.76695	1.28243	-0.0791759	0.449056	-0.249485	-0.253209	-0.277977	-0.671499	-0.219417	-0.498807	-0.132405	-0.338706	-0.178161	-0.317094	-0.129064	-0.307592	-0.283543	-0.36736	-0.245295	-0.171571	-0.393091	0.0854142	-0.111574	-0.267326	-0.197037	-0.652725	0.0844751	-0.0989361
1629				1	0.102033	0.442495	-0.260415	-0.599442	0.171152	0.00164295	-0.0842573	-0.483597	-0.302813	-0.297414	-0.167602	-0.245799	-0.110495	-0.0818092	-0.266523	-0.235133	-0.303173	-0.478117	0.0254351	0.448458	-0.0708284	-0.231739	-0.226237	-0.341727	0.103024	0.224704	0.00317256	-0.138046	-0.462191	0.0202223	-0.248458
1629				2	-0.0385858	2.10189	-0.234592	-0.537148	1.39296	-0.681436	-0.37374	-0.365125	-0.327559	-0.142873	-0.255109	0.247689	-0.187483	-0.112006	-0.282876	0.382036	-0.382726	0.165955	-0.215158	-0.164275	0.103868	-0.0215776	-0.142468	-0.301318	0.191228	0.230483	-0.0674566	0.0339198	-0.251345	-0.0783911	-0.0207898
1629				3	-0.207196	-0.898886	-0.312977	-1.07404	-0.684131	0.228328	-0.203806	0.0402709	0.06083	0.0563158	-1.58723	-0.552199	-1.07735	-0.223383	-0.39137	-0.277786	-0.365536	-0.318078	-0.311368	-0.180162	-0.167074	-0.102484	-0.167649	-0.208098	-0.0584813	-0.267047	-0.0637845	-0.0435106	-0.126324	0.12387	-0.303228
1629				4	-0.056491	-1.56257	-0.291332	-0.4243	-0.804832	-0.095071	-0.0222274	-0.11625	0.185778	-0.0344284	-0.951966	-0.565627	-0.39938	-0.160001	-0.279079	-0.398144	-0.380037	0.0277996	-0.279228	-0.371163	-0.0802027	-0.112291	-0.181682	-0.148116	-0.194136	-0.112423	-0.399919	-0.0996698	-0.442281	-0.133396	-0.192326
1629				5	-0.217629	0.418559	-0.192237	-0.024678	0.0545953	-0.189953	-0.403385	-0.0976025	0.0763006	-0.0497304	-0.443517	-0.364407	-0.375528	-0.109682	-0.274455	-0.525021	-0.280566	0.386082	-0.203073	-0.155503	-0.181464	-0.198222	-0.075263	-0.209219	-0.154547	-0.133614	-0.253022	-0.0888056	-0.52006	0.175835	-0.181316
1629				6	-0.129478	0.461843	-0.388629	0.0511648	0.014603	-0.516825	-0.372526	0.0946245	0.170749	-0.0673819	-0.655096	-0.240288	-0.250049	-0.14104	-0.409058	-0.176583	-0.308401	-0.232507	-0.0408833	-0.105339	-0.27639	-0.165892	-0.140138	-0.0770608	-0.134877	-0.182516	-0.203386	-0.161529	-0.407793	0.129189	-0.135112
1629				7	-0.227754	-0.502058	-0.324876	-0.000463549	-0.265972	-0.344689	-0.501966	-0.297796	0.583404	0.0864063	-0.11267	-0.346457	-0.114865	-0.0918384	-0.263597	-0.314543	-0.0854791	-1.3056	-0.299722	-0.271245	-0.0231187	-0.0633469	-0.162941	-0.0949581	-0.158596	-0.377732	0.176137	-0.0828314	-0.239477	0.16477	-0.106515
1629				8	-0.070491	-0.518374	-0.308449	-0.151104	-0.286013	-0.280319	-0.483139	-0.107068	0.505148	-0.0768202	0.0271713	-0.0791534	-0.0128006	-0.0951024	-0.20242	-0.11461	-0.197729	-1.43165	-0.298013	-0.167319	-0.424371	-0.186369	-0.143258	-0.170654	-0.0680407	-0.208573	0.263196	-0.165797	-0.560022	0.105076	-0.172093
1629				9	-0.217024	-0.440711	-0.26409	-0.423065	-0.241941	-0.104245	-0.106417	-0.0217448	-0.079288	-0.12624	0.0359318	-0.0796064	0.00756518	-0.0246286	-0.201882	-0.0411791	-0.239293	-0.318198	-0.296707	-0.238136	-0.574725	-0.225099	-0.0900497	-0.14635	0.0518857	-0.0357626	0.23924	-0.202672	-0.0695389	0.113339	-0.0997143
1629				10	-0.217963	0.155449	-0.18848	-0.510214	-0.0643873	-0.0376227	-0.11485	0.0174038	-0.0153088	-0.305644	-0.841609	-0.312842	-0.805209	-0.0668354	-0.212982	-0.415426	-0.281544	-0.175297	-0.431326	-0.35768	-0.435879	-0.174886	-0.140516	-0.0971145	-0.0261002	-0.149431	0.19834	-0.118333	-0.300449	0.0102468	-0.0739154
1629				11	-0.136236	-0.043004	-0.261353	-0.254022	-0.0485628	-0.34428	0.0309958	-0.131115	-0.160615	-0.320196	-0.286067	-0.340689	-0.0896133	-0.071417	-0.0462202	-0.278588	-0.118016	-0.118387	-0.214777	-0.293266	0.126483	-0.106269	-0.152731	-0.0875853	0.0542679	-0.0519844	0.320549	-0.173973	-0.706411	0.293929	-0.0455282
1629				12	-0.171732	0.149915	-0.219021	-0.351705	0.00657438	-0.0871748	-0.0711134	-0.0447299	-0.118295	-0.14296	-0.0415352	-0.0155457	-0.0967438	-0.1027	-0.0664495	-0.192106	-0.232726	-0.7515	-0.19234	-0.250876	-0.289971	-0.245331	-0.108051	-0.152462	-0.110516	-0.0773421	0.196715	-0.248816	-0.503033	0.0744444	-0.186769
1630				1	0.0365173	4.3913	-0.133486	-0.236007	3.02868	-0.709182	-0.608511	-0.348476	-0.038407	-0.106149	-0.10249	0.0504541	0.0257607	-0.0922062	-0.062063	0.00873712	-0.145148	-0.338656	-0.00615826	-0.225572	-0.262084	-0.0895709	-0.13219	-0.110697	-0.16509	-0.109294	0.157834	-0.100534	-0.0604733	0.0259119	-0.113591
1630				2	-0.154598	1.06244	-0.176886	-0.228491	0.530488	-0.298957	0.0740621	-0.100131	0.366144	-0.013528	-0.38091	-0.0241966	-0.273087	-0.043773	0.0442784	-0.0594878	-0.154486	0.451952	0.0718959	-0.219384	-0.240126	0.0314371	-0.128566	0.00024128	0.14202	0.205752	0.280511	-0.00222632	-0.222422	-0.0354529	-0.00645034
1630				3	-0.0606891	0.907446	-0.219326	-0.416538	0.507465	-0.109258	0.112931	-0.225129	0.478312	-0.0630537	-0.391976	-0.346146	-0.18185	-0.0195909	0.0288494	-0.270316	-0.301998	0.376499	-0.0785491	-0.226975	-0.222638	-0.106905	-0.144316	-0.196564	-0.111122	0.0962308	-0.134082	-0.128678	-0.311133	-0.27946	-0.0979956
1630				4	0.0546864	0.0664733	-0.284593	-0.653127	0.0300458	0.0536075	-0.0173121	-0.124435	-0.0447803	-0.120606	-0.854198	-0.196713	-0.394516	-0.0873845	-0.045837	-0.179413	-0.265705	-0.216498	-0.330211	-0.273581	-0.204903	-0.216769	-0.250159	-0.344918	-0.128792	-0.284591	-0.218482	-0.266794	-0.503306	-0.35576	-0.181683
1630				5	-0.0777806	-1.70772	-0.278923	-0.136313	-0.609861	-0.234236	-0.163885	-0.358485	-0.0474139	-0.100374	-0.268439	-0.0818218	-0.199632	-0.0747664	-0.0208886	-0.0605447	-0.215966	-1.02612	-0.194593	-0.116413	-0.273143	-0.172009	-0.249011	-0.270104	-0.0785716	-0.22573	-0.111096	-0.180768	-0.306118	-0.273168	-0.186931
1630				6	-0.12746	0.0942001	-0.310181	0.0944097	-0.207978	-0.252547	-0.151377	-0.0703284	0.0968178	-0.081317	-0.409537	-0.241328	-0.402269	-0.104055	-0.0766207	-0.432002	-0.260271	-0.0991256	-0.278402	-0.275705	-0.13798	-0.100014	-0.0897591	-0.107199	-0.169531	-0.317277	-0.0488068	-0.117796	-0.260306	-0.0153231	-0.09765
1630				7	-0.135172	-0.587713	-0.285083	0.144362	-0.240393	-0.277036	-0.281297	-0.29782	0.402523	-0.118739	-0.505694	-0.509465	-0.481675	-0.216293	-0.108816	-0.462475	-0.171184	-0.64425	-0.143086	-0.0158943	-0.213079	-0.110832	-0.115302	-0.33198	-0.00397396	-0.0814612	-0.000782903	-0.0493479	-0.404337	-0.102554	-0.119021
1630				8	-0.188798	-0.669964	-0.246931	-0.106099	-0.347341	-0.159984	-0.342392	0.224198	0.189053	-0.104515	-0.492835	-0.213734	-0.241619	-0.0742608	-0.162444	-0.191899	-0.18998	-1.23335	-0.25243	-0.341219	-0.12644	-0.0915261	-0.131457	-0.1894	-0.0677469	-0.161416	0.173804	-0.106072	-0.372234	0.0560931	-0.128027
1630				9	-0.131192	0.0829103	-0.179161	0.133344	0.0939002	0.00928936	-0.194519	-0.111042	-0.0213885	-0.21985	-0.485944	-0.112665	-0.309263	-0.130361	-0.120978	-0.172094	-0.202046	0.310773	-0.0505164	-0.0675087	-0.0960529	-0.030904	-0.0717258	0.113174	-0.114597	-0.138702	0.232875	-0.077674	-0.378323	0.189274	-0.111837
1630				10	-0.0721286	0.217005	-0.238031	-0.331368	0.0982504	-0.170774	-0.0535323	-0.21733	-0.36332	-0.177601	-1.03271	-0.584648	-0.878441	0.0157223	-0.0969657	-0.512894	-0.141871	-0.0481524	0.0423775	-0.167744	-0.226995	-0.1121	-0.0969958	0.06036	-0.137008	-0.115334	0.155341	-0.176652	-0.103668	0.240651	-0.103794
1630				11	-0.081837	0.218015	-0.22509	-0.250091	0.290648	-0.0446167	-0.18331	-0.140551	0.143304	-0.295551	-0.255263	0.0426752	-0.195575	-0.0999834	-0.102653	0.0887286	-0.223136	-0.0684634	0.119038	-0.140894	-0.165171	-0.140182	-0.13456	-0.238479	-0.0387668	-0.0360943	0.167705	-0.107778	-0.055847	0.146992	0.0282939
1630				12	-0.052883	0.734168	-0.1619	-0.172417	0.519583	-0.0679619	-0.341404	-0.522857	0.0687567	-0.193119	-0.259301	-0.16222	-0.100901	-0.0520389	-0.196712	-0.414276	-0.17396	-0.0953708	-0.0303603	-0.173104	-0.20259	-0.139851	-0.111063	-0.231371	0.0428708	-0.158716	0.0114558	-0.106715	-0.334362	-0.0037569	-0.0697212
1631				1	0.0691597	-1.16027	-0.114781	-0.364953	-0.539834	-0.270461	-0.520456	0.054454	-0.109994	-0.247949	-0.26684	-0.184895	-0.361217	-0.0544083	-0.0917166	0.0185123	-0.413336	-0.73182	0.120896	0.0256403	-0.216836	-0.182045	-0.169261	-0.182828	-0.00294863	0.0429241	0.109025	-0.104709	-0.383549	0.05506	-0.0794137
1631				2	0.25366	-0.841051	-0.108522	-0.067282	-0.468483	-0.44484	-0.0308154	-0.0919929	-0.17944	-0.113755	-0.274249	-0.384482	-0.122977	-0.0318692	-0.177117	-0.494562	-0.151093	-1.41349	-0.24588	-0.243381	-0.16984	-0.0520742	-0.138213	-0.150523	0.00909157	0.098421	-0.0399031	-0.124577	-0.317532	-0.0706816	-0.0414578
1631				3	-0.201701	1.19633	-0.212195	-0.304428	0.661744	-0.110172	-0.228347	-0.0474423	0.160411	0.0448832	-0.554308	-0.248312	-0.193905	-0.0893712	-0.229139	0.106913	-0.186962	-0.304386	-0.222012	-0.24982	-0.036855	0.0151745	-0.106631	-0.178881	-0.0250532	-0.0575673	0.0685855	0.00862675	-0.2712	-0.0429181	-0.0583532
1631				4	-0.033496	-0.342421	-0.197923	-0.0741666	-0.326773	-0.0486159	-0.183235	-0.265073	0.169066	0.194934	-0.85853	-0.748931	-0.499082	-0.255744	0.0849118	-0.441793	-0.0690097	-1.70896	-0.0427528	-0.138544	-0.150576	-0.112289	-0.131917	-0.130309	-0.0941547	-0.118067	-0.0346346	-0.156043	-0.286283	-0.00969645	-0.219458
1631				5	-0.14206	0.0968292	-0.223709	0.267743	-0.0372979	-0.188729	-0.113363	-0.087435	-0.0691062	-0.0166207	-0.948028	-0.58076	-0.556636	-0.168635	0.262751	-0.578155	-0.270926	-1.60538	-0.135774	-0.169897	-0.0746545	-0.135581	-0.142289	-0.201143	-0.0979484	-0.0286018	-0.264493	-0.201477	-0.519251	-0.097869	-0.108402
1631				6	-0.112428	0.419073	-0.30666	-0.00371103	0.0071291	-0.0750064	-0.238071	-0.363262	-0.0271922	-0.118539	-1.00675	-0.640164	-0.550813	-0.0534507	0.203376	-0.672637	-0.315582	-0.425445	-0.3081	-0.304555	-0.00675049	-0.157673	-0.16059	-0.162075	-0.165838	-0.0725569	-0.255037	-0.150127	-0.40679	0.0301291	-0.134191
1631				7	-0.0975759	0.251386	-0.282256	0.0740222	-0.0961898	-0.180598	-0.248649	-0.537651	0.237492	-0.0212368	-0.63217	-0.884871	-0.341194	-0.134555	-0.120258	-0.916438	-0.135993	-0.841554	-0.461702	-0.353422	-0.0890786	-0.104126	-0.110465	-0.189482	-0.192412	-0.295439	0.0584403	-0.0969744	-0.27701	0.135247	-0.101796
1631				8	-0.108907	-0.740233	-0.234907	-0.0232535	-0.34781	-0.0409296	-0.212752	0.0308882	0.128439	-0.132006	-0.605452	-0.300997	-0.392588	-0.105702	-0.0437307	-0.301868	-0.225661	-2.0251	-0.322518	-0.19065	-0.0347153	-0.150581	-0.180238	-0.0559862	-0.11243	-0.307262	0.220859	-0.0988909	-0.217076	0.15662	-0.10599
1631				9	-0.152758	0.0299575	-0.217838	-0.262765	-0.0821462	-0.131004	-0.168733	0.116919	-0.129154	-0.0973873	-0.348264	-0.0091814	-0.237178	0.00240618	-0.0159559	-0.131481	-0.181731	-0.443681	-0.0126403	-0.10259	-0.202311	-0.220643	-0.150333	-0.108952	-0.014491	-0.0386465	0.184703	-0.182912	-0.272153	0.163138	-0.192911
1631				10	-0.0243705	0.334231	-0.192104	-0.279544	0.0525523	0.0485413	-0.151477	0.463605	-0.155392	-0.239873	-1.16488	-0.426308	-0.746329	-0.043499	-0.103388	-0.266925	-0.247082	-0.211751	-0.252127	-0.0679836	0.233444	-0.170346	-0.18254	-0.213892	0.0323639	-0.012604	0.135972	-0.113965	-0.0785862	0.0972944	-0.00418269
1631				11	-0.0614093	0.047598	-0.270001	-0.336086	0.117122	0.091301	-0.104289	0.0516116	0.11189	-0.342728	-0.113394	-0.2037	-0.0239633	-0.109545	-0.170705	-0.285244	-0.300431	-0.519689	-0.305227	-0.296813	0.139461	-0.17835	-0.198311	-0.0826338	0.089635	0.00773853	0.0562343	-0.1394	-0.369074	0.0528187	-0.0832727
1631				12	0.0286028	0.504596	-0.180777	-0.335195	0.45416	-0.148595	-0.154295	-0.303911	0.322281	-0.163237	-0.141066	0.0101227	-0.131298	-0.027766	-0.127958	-0.0242295	-0.277346	-0.784965	-0.208665	-0.211758	-0.0996482	-0.180496	-0.206033	-0.147819	-0.102177	-0.159749	-0.133547	-0.0974336	-0.190052	0.01187	-0.163902
1632				1	0.177043	0.11751	-0.113274	-0.11841	-0.0014995	-0.353784	0.0874785	-0.260448	0.227231	-0.0403494	-0.27954	-0.213215	-0.260645	-0.034795	-0.0307215	-0.0767426	-0.218971	0.033063	-0.371221	0.111518	0.138114	-0.0194834	-0.0521782	-0.103388	-0.0952929	-0.241329	-0.176317	-0.0894158	-0.227837	-0.0992731	-0.0128911
1632				2	0.113874	0.13298	-0.139523	-0.0376578	0.083743	-0.423154	-0.119113	-0.0324874	-0.249362	-0.163509	-0.404322	-0.343811	-0.190578	-0.0290005	-0.109967	-0.0875601	-0.315316	-0.786714	0.0216659	-0.152284	0.100765	-0.0355013	-0.17134	-0.141099	-0.0406502	-0.0901938	-0.204524	-0.0389313	-0.335236	-0.112216	-0.0812146
1632				3	-0.0317451	-0.0265086	-0.170758	-0.346588	-0.0137464	0.0784347	0.017774	-0.131828	-0.174504	-0.0277544	-0.386628	-0.240983	-0.170548	-0.0486684	-0.233987	0.22173	-0.0998114	-0.448135	-0.172093	-0.151422	-0.0474942	-0.0927394	-0.0812822	-0.288746	0.0294245	-0.114121	-0.183461	-0.083975	-0.413796	-0.14091	-0.142422
1632				4	-0.108455	-0.679261	-0.157264	0.00234647	-0.19742	-0.127844	-0.432198	0.476848	-0.00607262	0.0640232	-0.200876	-0.156333	-0.0773187	-0.153095	-0.127935	-0.145027	-0.190842	-0.609391	-0.2754	-0.299558	-0.145886	-0.0986416	-0.0697243	-0.166558	-0.0887436	-0.164085	-0.0134001	-0.175157	-0.47363	0.0441022	-0.141756
1632				5	-0.15903	-0.601318	-0.243516	-0.211808	-0.296381	-0.0896256	-0.257158	0.0089854	-0.163949	-0.0033837	-0.394708	-0.347729	-0.152219	-0.154295	-0.0504697	-0.200437	-0.161814	0.0518817	-0.43971	-0.333415	-0.268151	-0.183867	-0.068881	-0.100409	-0.151396	-0.174471	-0.249598	-0.195486	-0.272709	-0.193679	-0.138938
1632				6	-0.120147	-1.5233	-0.226634	-0.257663	-0.476842	-0.264727	-0.408668	-0.0756895	0.206958	-0.0895873	-0.274771	-0.234065	-0.17021	-0.0145809	-0.034579	-0.215403	-0.256652	-0.385423	-0.247792	-0.186685	-0.101355	-0.0977331	-0.10975	-0.146282	-0.0287303	0.00967846	-0.249021	-0.100605	-0.282492	-0.100509	-0.0864786
1632				7	-0.128589	-0.905493	-0.264817	-0.358923	-0.340816	-0.203421	-0.406507	-0.273765	0.38978	-0.0694126	-0.41659	-0.237572	-0.225394	-0.0691257	-0.0473746	-0.198183	-0.21833	-0.828204	-0.314593	-0.0664676	-0.15172	-0.0861225	-0.0887914	-0.144271	-0.0627337	-0.0681865	-0.17809	-0.0726023	-0.271593	-0.0629384	-0.0281112
1632				8	-0.151126	-1.23971	-0.245806	-0.510147	-0.475929	-0.0731495	-0.448128	-0.300305	0.292946	-0.106102	-0.449174	-0.144411	-0.139231	-0.0964013	-0.037961	-0.194913	-0.232031	-0.0887827	-0.00914272	-0.187628	-0.18452	-0.0654717	-0.170316	-0.0723742	-0.0190838	-0.0428869	-0.173642	-0.0612799	-0.227965	0.192364	-0.17437
1632				9	-0.181355	-0.606827	-0.182743	-0.409405	-0.116505	-0.0289101	-0.307207	-0.0722316	-0.0829196	-0.229025	-0.693698	-0.29977	-0.28746	-0.174376	-0.137261	-0.295353	-0.237372	-0.227774	-0.218034	-0.157434	-0.201041	-0.0977528	-0.13658	0.00872167	-0.0575332	-0.285715	-0.187104	-0.101152	-0.150704	0.199088	-0.0952817
1632				10	0.00614516	-0.591985	-0.149345	-0.615986	-0.401655	0.0386092	-0.208188	0.0075056	-0.0249676	-0.369866	-0.807256	-0.324876	-0.934927	-0.0997047	-0.165283	-0.261042	-0.372609	-0.337147	-0.305584	-0.359489	-0.434046	-0.226107	-0.163219	-0.255894	-0.0166512	-0.0758049	-0.184188	-0.199666	-0.00617561	0.115019	-0.109184
1632				11	-0.018862	-0.30306	-0.259501	-0.352347	-0.157034	-0.0667598	-0.238467	0.102927	-0.373082	-0.269619	0.225477	0.146952	0.11545	-0.0797197	-0.0835012	0.0117995	-0.202332	-0.600477	0.03735	0.133254	-0.298209	-0.121578	-0.0703033	-0.0438269	-0.0181245	0.0321354	-0.156792	-0.104458	-0.126863	-0.0562874	-0.120371
1632				12	0.000911903	-0.108657	-0.243029	-0.578643	-0.428515	0.00305888	0.467185	-0.535174	-0.01584	-0.273699	-0.265775	0.00324811	-0.199002	-0.0568817	-0.313531	0.123514	-0.245114	-0.154476	-0.0427352	-0.0829533	-0.273814	-0.191631	-0.091579	-0.0753268	0.00153662	-0.00612647	-0.392563	-0.0336099	-0.316271	-0.169847	-0.088562
1633				1	0.0769436	2.82343	-0.0823409	-0.584177	1.53528	-0.347234	-0.351713	0.0287882	-0.510077	-0.106567	0.0516215	0.0066835	0.301514	-0.00471992	-0.068342	0.0207448	0.0628731	-0.280404	-0.207754	0.14442	0.131265	-0.0684107	-0.141433	-0.187924	-0.00907122	-0.0532054	-0.0906003	0.013253	-0.446938	0.0262018	-0.00912596
1633				2	0.252739	0.832809	-0.137243	-0.601212	0.382141	-0.11234	-0.0893119	-0.131319	-0.815342	-0.219688	-0.0483453	0.182739	0.0479167	-0.0594151	-0.246848	0.491353	-0.40062	-0.767949	-0.126577	-0.240993	-0.0799909	-0.212122	-0.199498	-0.163512	-0.0683544	-0.0950261	-0.0466684	-0.0716977	-0.416949	-0.162084	-0.166578
1633				3	-0.000863202	0.540325	-0.287178	-0.272544	0.22879	-0.229631	0.181639	-0.0279115	-0.804073	-0.104455	0.619823	0.316669	0.526661	-0.0798765	-0.357013	0.442505	-0.102472	-0.662824	-0.15401	-0.276211	-0.242685	-0.193411	-0.188197	-0.288834	0.037506	-0.117306	0.0611621	-0.129589	-0.45998	-0.162276	-0.0802668
1633				4	-0.205764	-0.312589	-0.421871	-0.487555	-0.297659	-0.107185	-0.209326	0.108388	-0.395027	-0.0700615	-0.460484	-0.297356	-0.179048	-0.206874	-0.338897	-0.105541	-0.0991934	-0.159142	-0.0981365	-0.066812	-0.270259	-0.215522	-0.148812	-0.234704	-0.100836	-0.110368	-0.058219	-0.176372	-0.455478	-0.263214	-0.0146008
1633				5	-0.173116	-0.304471	-0.381372	-0.399304	-0.132201	-0.365733	-0.292587	-0.302439	-0.250371	-0.150957	-0.0136168	-0.35558	-0.0935261	-0.174792	-0.345718	-0.45935	-0.181487	0.375568	-0.0789698	-0.156217	-0.282948	-0.210867	-0.124844	-0.205921	-0.0355171	-0.0146887	-0.13948	-0.074058	-0.340555	0.00973975	-0.127521
1633				6	-0.20986	-0.697225	-0.248539	-0.595628	-0.27052	-0.270718	-0.658359	-0.000942813	-0.111045	-0.15071	-0.14432	-0.146473	-0.178306	0.0309895	-0.446482	-0.031247	-0.208879	0.974841	-0.0312874	-0.128816	-0.0335468	-0.0629335	-0.129304	-0.0283071	-0.105467	-0.124977	0.0527271	-0.0627229	-0.398286	0.000589943	-0.107145
1633				7	-0.116209	-1.25526	-0.303781	-0.754035	-0.452886	-0.288101	-0.483575	-0.387096	-0.156326	-0.198935	0.153598	-0.15984	-0.125483	-0.1884	-0.193239	-0.134204	-0.186872	0.302812	-0.217311	-0.0729278	-0.248752	-0.119501	-0.123108	0.0711548	-0.0310373	-0.0390308	-0.0257997	-0.0718127	-0.116294	0.0741561	-0.0398776
1633				8	-0.162818	-1.78801	-0.26643	-0.662042	-0.743943	-0.321771	-0.518553	-0.0353631	-0.00696932	-0.106376	-0.501406	-0.21349	-0.252919	-0.103211	-0.126292	-0.208875	-0.247294	0.420973	-0.158591	-0.0256422	-0.0435025	-0.0615407	-0.181855	0.00848598	-0.0604389	-0.151194	0.0150976	-0.0842844	-0.163061	0.0566271	-0.0752377
1633				9	-0.154089	-0.673761	-0.202251	-0.62161	-0.325876	-0.146303	-0.362625	-0.303933	-0.283943	-0.100462	-0.410348	-0.157892	-0.253352	-0.113095	-0.259002	-0.289428	-0.236243	-0.290182	-0.0946782	-0.175755	-0.22671	-0.0301678	-0.155367	-0.123767	-0.00783625	-0.0708741	-0.0119158	-0.0151321	-0.178292	0.207383	-0.036686
1633				10	-0.152439	-0.101206	-0.159229	-0.709533	0.0216894	-0.107591	-0.108819	0.00472469	-0.204735	-0.0575319	-1.18054	-0.668695	-0.815518	-0.0270824	-0.291637	-0.488994	-0.1927	-0.164658	0.0794049	-0.0407028	-0.327635	-0.147584	-0.128334	-0.0587463	0.0121984	0.0906522	0.0734682	-0.13144	-0.178388	0.140423	-0.0654696
1633				11	-0.0431254	0.174539	-0.207224	-0.496586	0.0788299	-0.281762	-0.0792146	0.547335	-0.137214	-0.0545312	-0.174612	-0.251907	-0.205898	-0.0368292	-0.257535	-0.0937071	-0.12785	-0.471715	0.100609	-0.156551	-0.125123	-0.174856	-0.195626	-0.159584	-0.160926	-0.329297	-0.0133496	-0.0446718	-0.0420282	-0.0689083	-0.094526
1633				12	-0.094898	-0.324434	-0.131832	-0.406422	-0.0203779	-0.0134745	-0.572751	-0.211966	0.0179945	-0.202242	-0.396007	-0.524138	-0.151979	-0.0388915	-0.258109	-0.553469	-0.0457981	-0.373086	-0.207404	-0.190661	-0.230691	-0.0986749	-0.214567	-0.286436	0.00591971	-0.100641	-0.22122	0.00306269	-0.408543	0.0380159	0.00327492
1634				1	-0.0557201	1.74258	-0.179076	-0.212201	1.1003	-0.114428	-0.626485	0.284862	0.278663	-0.0489115	-0.113173	0.0891778	-0.162847	-0.0319378	-0.179981	0.234678	-0.25884	0.750148	0.043387	0.133157	-0.074973	0.0257398	-0.0573776	-0.17722	-0.136661	-0.140193	-0.193178	0.0578601	-0.250514	0.145886	-0.019912
1634				2	-0.139652	-0.569128	-0.153086	-0.538888	-0.364789	0.0373096	-0.395856	0.307722	0.73756	-0.042142	-0.419222	-0.679487	-0.352527	-0.0531018	-0.0533035	-0.519432	-0.236285	1.30562	-0.117166	-0.371759	-0.153914	-0.168945	-0.0886468	-0.123143	-0.221587	-0.530644	-0.0385965	-0.0939831	-0.200646	0.272996	-0.110592
1634				3	-0.214952	0.834162	-0.19122	-0.309908	0.424483	-0.00914148	0.0494741	0.294014	0.739489	0.0779432	0.923933	0.229599	0.781991	-0.119904	-0.0940258	-0.0189682	0.0724889	0.291946	-0.0912215	-0.180387	-0.171636	-0.0454753	-0.104331	-0.122801	-0.0475999	-0.0633389	-0.260932	-0.0536787	-0.115347	0.163882	-0.0369452
1634				4	-0.227586	-0.695349	-0.147073	0.159406	-0.273687	-0.182849	-0.310563	-0.334028	0.242381	-0.029887	-0.0935348	-0.0745676	-0.27114	-0.080066	-0.173284	-0.0966646	-0.252182	0.683918	0.134264	-0.0181327	-0.337309	-0.174951	-0.119466	-0.215043	-0.206093	-0.166271	-0.432403	-0.171541	-0.0465251	-0.214359	-0.0687695
1634				5	-0.169028	-1.17301	-0.222507	-0.289212	-0.47654	-0.188078	-0.327131	-0.14673	-0.0741301	-0.0509263	-0.341481	-0.268661	-0.179843	-0.00610377	-0.145761	-0.422504	-0.234749	1.42206	-0.282065	-0.414971	-0.296256	-0.15347	-0.145278	-0.165766	-0.141635	-0.344127	-0.144908	-0.0958838	-0.354586	-0.123693	-0.119766
1634				6	-0.0942456	-0.671099	-0.235207	-0.135211	-0.334979	-0.27668	-0.332527	-0.178724	0.323747	-0.020341	-0.518315	-0.194108	-0.207304	-0.140969	-0.0358588	-0.157951	-0.068973	1.38071	-0.184435	-0.0757298	-0.311652	-0.116591	-0.128297	-0.0913869	0.00219355	-0.0627245	-0.186351	-0.0692422	-0.305527	-0.0864138	-0.0699362
1634				7	-0.166227	-1.1499	-0.273667	-0.13737	-0.518139	-0.17533	-0.421542	-0.440231	0.196531	0.042215	-0.400597	-0.295754	-0.183493	0.0319085	0.0113565	-0.437186	-0.0819848	0.539909	-0.405701	-0.160562	-0.107969	-0.0522213	-0.156621	-0.0320575	-0.176587	-0.24105	0.00922114	-0.0274764	-0.0191158	-0.0121877	0.0149243
1634				8	-0.18245	-0.59466	-0.251905	-0.843428	-0.454578	-0.175223	-0.120871	0.109041	0.189766	-0.0847071	-0.144429	-0.0410332	0.0329472	-0.0205174	-0.0251112	-0.138083	-0.0965235	0.429019	-0.252791	-0.0683955	-0.167568	-0.038929	-0.121038	-0.115879	-0.163347	-0.178819	-0.0334521	-0.00415478	-0.219046	-0.0437948	-0.024218
1634				9	-0.111805	-0.461684	-0.194367	-0.73009	-0.319521	0.0148493	-0.0880087	0.119182	-0.0131793	-0.118856	-0.351651	-0.262441	-0.207763	0.0595065	-0.0551767	-0.211524	-0.0694933	0.130435	-0.0789673	-0.0661173	-0.337056	-0.144738	-0.148077	-0.205212	-0.102569	-0.11128	0.220172	-0.0564987	-0.245124	0.0905958	-0.0733071
1634				10	-0.130026	-0.112355	-0.234199	-0.0629725	-0.0794925	-0.171737	-0.134803	0.236025	-0.194207	-0.15214	-1.01752	-0.638242	-0.625206	-0.0605755	-0.194582	-0.587347	-0.114394	-0.355116	-0.193651	0.0146055	-0.397427	-0.120591	-0.200504	-0.165432	-0.0760584	-0.0578873	0.258147	-0.0943387	0.130795	0.171561	-0.0734061
1634				11	-0.184609	0.822699	-0.330299	-0.210309	0.755249	-0.270069	-0.722579	0.0224564	0.163472	-0.215777	-0.221802	-0.348938	-0.0641731	-0.0534899	-0.317321	-0.316809	-0.172528	-0.411779	-0.0254227	-0.0974403	-0.478089	-0.158636	-0.120108	-0.226841	-0.018095	-0.164059	-0.013361	-0.0713479	-0.243114	0.0113949	-0.00154661
1634				12	-0.272692	0.546182	-0.232414	-0.557606	0.615746	-0.12219	-0.534887	-0.322398	-0.0298609	-0.130123	-0.330344	-0.267684	-0.435701	-0.140879	-0.125263	-0.0978713	-0.279998	0.118118	-0.331468	-0.436551	-0.129132	-0.0406305	-0.0896812	-0.194067	-0.126588	-0.360574	-0.00131009	0.00570628	-0.24437	-0.0981115	-0.0661926
1635				1	-0.0873554	-3.8565	-0.246695	0.0644234	-2.51878	0.0808044	0.194764	0.0470063	0.435142	-0.0395674	-0.183975	0.0687372	-0.102892	-0.120788	-0.19589	0.327485	-0.301378	0.165799	-0.246614	-0.0910618	-0.394589	-0.128507	-0.0940044	-0.110808	-0.210899	-0.48366	-0.29239	-0.129304	-0.20004	-0.147838	-0.145269
1635				2	0.123018	-1.81776	-0.189539	0.0130944	-1.2583	-0.481848	0.00249643	0.0408625	0.571712	0.030259	0.0120312	0.0846591	0.0771997	-0.055114	-0.0677955	0.0178705	0.0329962	-0.696889	-0.0408131	-0.499195	-0.343075	-0.0882681	-0.051053	-0.0207205	-0.228839	-0.500853	-0.336946	-0.0891575	-0.0605494	-0.0505858	0.013964
1635				3	-0.0473205	-0.498086	-0.304301	-0.163347	-0.182335	-0.212192	-0.442179	-0.143505	0.104361	-0.0456549	0.592657	0.0908445	0.805972	-0.0870977	-0.206521	-0.0154086	0.240059	-0.303961	0.00649198	-0.16495	-0.305284	-0.145445	-0.132226	-0.171496	-0.0425073	-0.0507113	-0.00270742	-0.15486	-0.206402	0.175025	-0.0560797
1635				4	0.0600728	-0.300373	-0.326551	-0.799372	-0.317176	-0.208051	-0.1064	-0.262149	-0.269273	-0.0534294	-0.341714	-0.0193437	-0.149008	0.00724672	-0.305685	-0.0933841	-0.138809	-0.42268	-0.0784985	0.00678876	-0.480563	-0.216834	-0.247037	-0.284896	-0.067963	-0.0833539	-0.240695	-0.173335	-0.309888	0.0118528	-0.184826
1635				5	-0.135011	-1.41924	-0.310516	-0.450635	-0.50217	-0.329243	-0.293099	-0.253547	-0.166875	0.0126132	-0.0345672	0.0694319	-0.202558	-0.126698	-0.141504	0.0971096	-0.267945	-0.518275	-0.278751	-0.316761	-0.393144	-0.133063	-0.181228	-0.249798	-0.123104	-0.173778	-0.238671	-0.128158	-0.283586	-0.132079	-0.135603
1635				6	-0.207197	-0.846726	-0.275265	-0.173876	-0.332522	-0.285112	-0.28878	-0.408615	-0.175822	-0.0101844	-0.060637	0.127212	0.0134415	-0.0936176	0.13244	0.186512	-0.228109	-0.209249	-0.215435	-0.0505776	-0.37052	-0.114317	-0.191966	-0.215754	-0.105963	-0.150937	-0.361452	-0.135669	-0.336217	-0.0769552	0.0182844
1635				7	-0.189003	-1.2689	-0.293218	-0.0374628	-0.435581	-0.140758	-0.384984	-0.643606	-0.0602303	-0.0109161	0.329915	0.098661	0.116615	-0.121999	0.0203992	0.139867	-0.17341	1.93444	-0.218854	-0.29047	-0.26091	-0.0402317	-0.167971	0.00501753	-0.168494	-0.104292	-0.0686483	0.0248632	-0.0422605	-0.109369	-0.0310161
1635				8	-0.194493	-1.14586	-0.273884	-0.709198	-0.672169	-0.404342	-0.272532	-0.21053	0.0773259	0.0811541	-0.358523	-0.0894741	-0.227946	0.0255527	0.0284262	0.0202689	-0.181713	-0.787967	-0.338915	-0.153511	-0.211174	-0.0432549	-0.11033	0.0879633	-0.0819185	-0.252631	0.0265874	-0.0195261	-0.181123	-0.0871373	-0.108111
1635				9	-0.259358	-0.207976	-0.287958	-0.672184	-0.32656	-0.223576	-0.277017	0.0785482	-0.0986476	-0.0835876	0.0387566	-0.291589	0.0495745	-0.0861921	-0.121736	-0.31125	-0.14318	-0.0492367	-0.222821	0.0115127	-0.423894	-0.0989124	-0.110573	-0.0367133	-0.135592	-0.0436505	0.10667	-0.0364372	-0.0619419	-0.0315299	0.0281314
1635				10	-0.152691	0.432486	-0.253301	0.109683	0.265545	-0.105265	-0.211461	-0.38122	-0.130398	-0.355864	-0.878655	-0.261693	-0.747006	-0.115292	-0.0454273	-0.0989483	-0.372975	0.153788	-0.126282	-0.208337	-0.465626	-0.3	-0.0999388	-0.0981578	0.073658	0.0482404	-0.086894	-0.176713	-0.220674	0.0595022	-0.199219
1635				11	-0.172646	0.251007	-0.345865	-0.693753	0.114577	-0.12923	-0.361758	-0.703858	-0.0904701	-0.247664	-0.110281	-0.135222	-0.201373	-0.0781137	-0.0236429	-0.17641	-0.285809	-0.711776	-0.208919	-0.0998617	-0.388623	-0.202735	-0.110114	-0.197679	0.0119334	-0.218782	-0.295946	-0.018192	-0.0575712	-0.168623	-0.0867936
1635				12	-0.212414	-0.221237	-0.343079	-0.629892	-0.00912358	0.119614	-0.579764	-0.41353	-0.126188	-0.270138	-0.446776	-0.320631	-0.302776	-0.0557792	-0.195075	-0.081315	-0.449475	0.0688612	-0.269012	-0.130629	-0.403882	-0.156792	-0.227125	-0.248613	-0.00411676	-0.1107	-0.372576	0.0654387	-0.41556	-0.0451941	-0.0294991
1636				1	-0.150697	-2.94798	-0.285895	-0.350922	-2.6953	-0.134947	1.62769	0.432731	0.198758	-0.145111	-0.00412838	-0.271863	0.164444	-0.0557491	-0.0867727	-0.471708	-0.0283229	-0.28211	-0.157638	0.527429	-0.172862	-0.155083	-0.0945843	-0.131367	-0.00698077	-0.202462	-0.125533	-0.0397656	-0.430419	0.0368429	-0.0967457
1636				2	-0.0842782	-1.59589	-0.273485	-0.640919	-1.46066	-0.00946283	0.505248	0.221704	-0.0429921	-0.0397941	-0.360154	-0.485323	-0.239556	-0.178504	-0.00355028	-0.491011	-0.103022	-0.382491	-0.271665	-0.401416	-0.0462613	-0.201437	-0.120824	-0.156322	-0.117699	-0.24491	0.274914	-0.121294	-0.399537	0.0749597	-0.134182
1636				3	-0.0619956	0.858535	-0.205859	0.354595	0.320726	-0.549176	-0.125157	-0.0717224	-0.301921	-0.0328318	-0.4809	-0.135973	-0.0798369	-0.158759	-0.0733292	-0.0315701	-0.118486	-0.393004	-0.190398	-0.0683241	-0.0786565	-0.0870002	-0.0549952	-0.0816138	0.0609416	-0.110399	0.202268	-0.017111	-0.34442	-0.0253571	-0.15694
1636				4	-0.0789138	-0.0325754	-0.225692	-0.0353291	-0.430245	-0.0756396	-0.0593768	-0.357022	-0.303495	0.10156	-0.0515827	-0.0997384	-0.117247	-0.145068	-0.157997	0.00362351	-0.0840377	-1.22272	-0.353551	-0.28192	-0.118641	-0.0321133	-0.139684	-0.176806	-0.0818905	-0.212622	-0.144711	-0.0894751	-0.266234	0.0279241	-0.0904713
1636				5	-0.22997	0.900263	-0.256378	-0.333358	0.049331	-0.177225	-0.0857126	-0.0326631	-0.181205	0.0209598	-0.611704	-0.156962	-0.43852	-0.183064	-0.0400136	-0.0376708	-0.258383	-1.16856	-0.252364	-0.15745	-0.0937089	-0.130957	-0.119151	-0.213282	-0.0527461	-0.22522	-0.16368	-0.151647	-0.50197	-0.0653869	-0.168184
1636				6	-0.247726	-0.557457	-0.337401	-0.430816	-0.417026	-0.324481	-0.294308	-0.144807	-0.103574	-0.218406	1.14788	0.592775	0.391068	-0.166749	-0.173648	0.743891	-0.216993	1.40176	-0.115113	-0.308932	-0.0489697	-0.174277	-0.220258	-0.328762	-0.097289	-0.115123	-0.227966	-0.149523	-0.231596	0.0165564	-0.156545
1636				7	-0.0578172	-1.78327	-0.21231	-0.376087	-0.653	-0.282393	-0.49442	-0.425292	0.0227222	-0.0249104	0.341451	0.140585	0.056852	-0.124521	0.0252687	0.269747	-0.222911	-0.0972241	-0.169999	-0.127786	-0.266681	-0.10973	-0.221484	-0.279727	-0.067522	-0.342577	-0.0427713	-0.0303317	-0.117116	0.00652339	-0.0490215
1636				8	-0.0951645	-1.66906	-0.304529	-0.555538	-0.809831	-0.377774	-0.451832	-0.0977666	0.0810777	-0.0113333	-0.460341	-0.00278893	-0.210522	-0.00380904	-0.036706	0.236622	-0.198145	-0.00949612	-0.29301	-0.122979	-0.326961	-0.114504	-0.182256	-0.151619	-0.0793446	-0.208723	-0.114677	-0.0657278	-0.234815	-0.0999662	-0.0746578
1636				9	-0.103922	-0.215945	-0.2987	-0.376614	-0.211938	-0.144209	-0.401041	-0.0866104	-0.153476	-0.167852	0.107436	-0.0940126	-0.0101407	-0.0493268	-0.182868	-0.129073	-0.176467	-0.404709	-0.264696	-0.170337	-0.442525	-0.235315	-0.104475	-0.201354	-0.0538968	-0.172877	-0.00843105	-0.150693	-0.21074	-0.0465502	-0.223307
1636				10	-0.205603	-0.182108	-0.308032	-0.462946	-0.0779934	-0.0873778	-0.392554	-0.07244	-0.440392	-0.48695	-1.10588	-0.326659	-0.930468	-0.0266895	-0.0988712	-0.214432	-0.39868	-0.202655	-0.350136	-0.137066	-0.318506	-0.275447	-0.125728	0.0927258	0.0481749	-0.0136044	0.0464411	-0.128646	-0.141391	-0.0282683	-0.179506
1636				11	-0.114535	0.416589	-0.362457	-0.880399	0.110238	-0.125033	-0.416857	-0.448781	-0.108144	-0.384136	-0.390555	-0.453288	-0.270466	-0.135317	-0.171445	-0.513448	-0.273106	-0.356455	-0.153181	-0.0708995	-0.0858466	-0.173133	-0.160502	0.0351316	-0.0408382	-0.265727	-0.0192452	-0.111654	-0.769167	-0.0327736	-0.0922544
1636				12	-0.172437	3.28329	-0.228355	-0.287021	2.37981	-0.456884	-1.3122	-0.547099	0.19468	-0.222694	-0.514501	-0.347891	-0.326994	-0.0856883	-0.208797	-0.207242	-0.249665	-0.5594	-0.166917	-0.118308	-0.188288	-0.101076	-0.246328	-0.227356	0.018472	0.0214395	-0.108774	0.0144915	-0.861858	-0.141361	-0.078207
1637				1	0.0235416	-1.94233	-0.289046	-0.154923	-0.939533	-0.118641	-0.869444	-0.317264	-0.347207	-0.0668558	-0.133241	-0.0182885	-0.101805	-0.110618	-0.132297	0.0925479	-0.144212	-0.645787	-0.320913	-0.166525	-0.247703	-0.127544	-0.23788	-0.188372	-0.0290373	-0.118928	-0.0519098	-0.0577347	-0.269755	-0.124963	-0.169019
1637				2	-0.0634347	-0.0802798	-0.327068	-0.138401	-0.0545002	-0.516308	-0.617385	-0.310953	0.19226	-0.27251	-0.371223	-0.0519485	-0.329272	-0.14227	-0.186843	0.374055	-0.379131	-0.807336	-0.31517	-0.404165	-0.190005	-0.19095	-0.215505	-0.287955	-0.0242718	-0.204416	-0.316976	-0.0993352	-0.296681	-0.230723	-0.183304
1637				3	-0.203273	-1.04368	-0.304188	-0.554987	-0.775571	0.015984	0.127647	-0.429387	0.146146	-0.0452124	-0.459769	-0.341082	-0.212962	-0.117144	-0.239577	-0.0727922	-0.22373	-0.386528	-0.191209	-0.143633	-0.303951	-0.178131	-0.129056	-0.330517	-0.0482942	-0.0601985	0.00533015	-0.0136759	-0.326454	0.0193817	0.0517942
1637				4	-0.188981	-0.50321	-0.358493	-0.306007	-0.426522	0.0998008	0.0978193	-0.334149	0.0198978	0.0560867	-0.412879	-0.155862	-0.363451	-0.084615	-0.177362	-0.105772	-0.236278	-1.85962	-0.0383373	-0.0715594	-0.429679	-0.277753	-0.249944	-0.490048	-0.169421	-0.248166	-0.18011	-0.159067	-0.336261	0.00795987	-0.182699
1637				5	-0.395852	0.628093	-0.403898	-0.177484	-0.0481698	-0.236444	-0.148548	-0.711916	-0.354571	-0.0269643	-0.109449	0.100665	-0.138152	-0.203865	-0.00303586	0.176685	-0.24304	-1.74875	-0.195166	-0.119844	-0.526132	-0.365824	-0.216039	-0.432139	0.041227	-0.0869657	-0.0701379	-0.231899	0.0327168	-0.0743095	-0.116802
1637				6	-0.266605	-0.245765	-0.389046	-0.411838	-0.39222	-0.166304	-0.373623	-0.106327	-0.15933	-0.156947	0.332284	0.26053	0.100314	-0.107106	-0.180905	0.476184	-0.360437	0.0488808	-0.148116	-0.302065	-0.471224	-0.257525	-0.240518	-0.466791	-0.0129622	-0.0306019	0.0570606	-0.0699537	-0.352381	-0.0793375	-0.201364
1637				7	-0.180961	-1.51419	-0.306148	-0.688571	-0.548609	-0.147545	-0.353448	-0.358626	0.0304622	-0.110079	0.724395	0.670992	0.0807912	-0.19705	-0.160766	0.933673	-0.274547	-0.358277	-0.0799587	-0.0270017	-0.530479	-0.237843	-0.15668	-0.286702	0.0790319	0.00235249	0.116042	-0.0989886	-0.130581	-0.0533044	-0.108157
1637				8	-0.185065	-0.954127	-0.346603	-1.02657	-0.52761	-0.397199	-0.459183	-0.210407	0.0978929	-0.102846	-0.420659	0.163787	-0.261507	-0.0928155	-0.257596	0.171845	-0.215952	-1.83037	-0.223898	-0.255256	-0.517646	-0.249046	-0.198497	-0.26454	0.0509588	-0.0722229	0.0197324	-0.137593	-0.210064	-0.0559522	-0.166363
1637				9	-0.227023	-0.596146	-0.322252	-0.352177	-0.317761	-0.264318	-0.222292	-0.359952	-0.155502	-0.111578	0.190007	-0.197082	0.211575	-0.0149392	-0.215794	-0.126069	-0.0732336	-0.436589	-0.201614	-0.162396	-0.441947	-0.140666	-0.135927	-0.14495	0.121323	0.0536119	0.199014	0.0578698	-0.0872581	0.141673	-0.0238305
1637				10	-0.217127	0.173673	-0.190994	-0.522975	-0.0808153	-0.151685	-0.210816	-0.58535	-0.244103	-0.286961	-0.812861	-0.457699	-0.642849	-0.119192	-0.113239	-0.515075	-0.30341	-0.288335	-0.152239	-0.223734	-0.447395	-0.118813	-0.100877	-0.0651607	-0.0526342	-0.185791	0.111732	0.0951506	-0.0180431	0.135685	-0.0458277
1637				11	-0.064894	-0.886195	-0.13702	-0.343411	-0.601006	-0.458337	-0.22938	-1.11862	-0.0488918	0.018114	-0.0445928	-0.0797723	0.0347105	-0.104838	0.0822359	-0.433781	-0.191476	-0.732978	0.0434707	-0.0342393	-0.392342	0.0470338	-0.170578	-0.163946	-0.182895	-0.151959	-0.123663	0.218746	-0.131119	-0.131355	-0.131737
1637				12	-0.266386	-1.7316	-0.272144	-0.214176	-0.961338	-0.100128	0.147349	-0.666414	-0.118966	-0.162558	-0.345961	-0.262277	-0.363869	-0.0615165	-0.242574	-0.375703	-0.29979	0.412808	-0.0189257	-0.228725	-0.512675	-0.226313	-0.116067	-0.141889	-0.0844199	-0.199506	-0.698116	0.00683161	-0.104498	-0.280496	-0.116556
1638				1	-0.10335	-0.274102	-0.259013	-0.689051	0.554729	-0.166794	-1.5194	-0.0124348	0.287132	-0.0647329	-0.179807	0.0763885	-0.118072	-0.150186	-0.188713	0.330611	-0.174557	-0.874345	0.167662	0.106741	-0.487151	-0.109182	-0.210179	-0.260432	-0.156025	-0.250023	-0.523507	-0.0958703	-0.280253	-0.241847	-0.0686562
1638				2	-0.000671514	3.34686	-0.268749	-0.617415	1.84946	-0.415744	-0.61281	0.253828	0.277311	-0.0535308	-0.354159	-0.0203445	-0.178497	-0.179561	-0.211337	0.0845943	-0.349248	-1.16524	0.0576557	0.306771	-0.507834	-0.162718	-0.199542	-0.246102	-0.144542	-0.311024	-0.536935	-0.171982	-0.185349	-0.117629	-0.030235
1638				3	-0.14722	-0.393476	-0.288361	-0.750431	-0.721022	-0.306552	0.267601	0.126713	0.0501889	-0.168513	-0.846217	-0.544735	-0.149241	-0.145903	-0.334329	-0.386245	-0.32394	-0.4005	-0.0807254	-0.0849533	-0.299974	-0.0423969	-0.188111	-0.344305	0.003744	-0.141506	-0.365945	0.00491886	-0.501637	-0.176974	0.0453722
1638				4	-0.342683	0.0982335	-0.41008	-0.700681	-0.413514	-0.241463	0.0719089	-0.0894872	0.0376476	0.0106232	-0.399265	-0.262657	-0.238947	-0.123052	-0.379093	-0.246108	-0.32453	-0.321897	-0.102893	-0.0841698	-0.47449	-0.231479	-0.221961	-0.287591	-0.00368347	-0.03238	-0.373981	-0.197019	-0.290385	-0.0261225	-0.199678
1638				5	-0.31446	0.54533	-0.350997	-0.372177	-0.153633	-0.163577	-0.484982	0.154504	-0.189923	0.0589942	-0.386832	-0.0862935	-0.171804	-0.0663359	-0.41138	-0.0595767	-0.262505	-0.243462	-0.1401	-0.117919	-0.351346	-0.205315	-0.18827	-0.347073	0.0377366	-0.0960809	-0.080697	-0.106773	-0.247251	0.116521	-0.115919
1638				6	-0.362205	-0.564642	-0.420008	-0.796628	-0.392082	-0.189455	-0.422022	0.140369	-0.0290157	0.0437135	-0.26425	-0.00697594	-0.0696484	-0.0332385	-0.296155	0.203885	-0.166276	-0.849853	-0.238553	-0.249984	-0.235045	-0.149916	-0.204555	-0.208164	-0.0984744	-0.133225	0.109972	-0.0863416	-0.202687	-0.0409712	-0.111392
1638				7	-0.317907	-0.142794	-0.419168	-0.36189	-0.358939	-0.304375	-0.535789	0.196425	-0.0377732	0.0634399	-0.106656	-0.026133	-0.197377	-0.110567	-0.328342	0.13511	-0.163242	0.301385	-0.200212	-0.0770286	-0.0661752	-0.0949306	-0.18644	-0.253567	-0.0958729	-0.0605361	0.291308	-0.0140792	-0.15075	0.0805285	-0.0544193
1638				8	-0.322496	-0.604754	-0.353401	-0.785081	-0.377219	-0.231993	-0.471943	-0.27494	0.17458	-0.0673731	-0.505828	0.046209	-0.212904	-0.187729	-0.231914	0.0696616	-0.16672	0.794055	-0.289073	-0.0874518	-0.193023	-0.0285435	-0.193444	-0.119341	-0.221453	-0.165772	0.222623	0.0646128	-0.154298	0.226694	0.0352169
1638				9	-0.276245	-0.967252	-0.311747	-0.627006	-0.510491	-0.109832	-0.366276	-0.0845468	-0.191654	-0.199444	-0.134826	0.039477	-0.119779	-0.196603	-0.163621	-0.0927224	-0.263713	0.565816	-0.221631	-0.112592	-0.232486	-0.0515415	-0.18721	0.0880674	-0.10838	-0.240654	0.34794	0.0590676	-0.133345	0.282267	-0.0884762
1638				10	-0.181017	-0.757509	-0.365449	-0.657551	-0.456296	-0.105296	-0.193804	-0.488571	-0.278138	-0.322732	-0.938043	-0.383391	-0.861733	-0.118483	-0.272695	-0.443172	-0.278464	-0.293078	-0.0929336	0.0212946	-0.343864	-0.139401	-0.17143	-0.14875	0.0294123	0.0101431	0.219705	-0.0254663	-0.204311	0.148984	-0.025463
1638				11	-0.273674	0.0528737	-0.395874	-0.826432	-0.137803	-0.181435	-0.136527	-1.0945	0.265233	-0.248003	-0.366062	-0.550208	-0.289597	-0.15007	-0.252458	-0.698817	-0.186974	-0.593664	-0.0552308	-0.12915	-0.10649	-0.0857463	-0.180252	-0.0131777	0.0242282	-0.0426098	-0.0296479	-0.0805414	-0.498316	0.112414	0.0335391
1638				12	-0.297235	-0.0528111	-0.403295	-0.935067	-0.134136	-0.113592	0.0240261	-0.6426	0.376614	-0.257795	-0.419315	-0.222732	-0.189823	-0.133414	-0.205778	-0.0930419	-0.37128	-0.98528	0.160891	-0.182066	-0.246325	-0.185652	-0.147039	-0.116201	-0.0550392	-0.153948	-0.0549142	0.017097	-0.332052	-0.0724119	-0.0400772
1639				1	-0.130265	-0.671576	-0.336064	-0.493212	-0.582794	-0.276303	0.370464	-0.638116	0.0784963	-0.280784	-0.433042	-0.402837	-0.424857	-0.16423	-0.341175	-0.367077	-0.534065	-0.435981	-0.172103	-0.040949	-0.0650052	-0.0474089	-0.0952633	-0.167948	0.0494462	-0.174335	-0.09666	0.120263	-0.44533	0.0345427	-0.0549958
1639				2	-0.0888063	2.07372	-0.334778	-0.213287	0.719586	-0.575881	0.551367	-0.468959	-0.240767	-0.121839	-0.659631	-0.555624	-0.426773	-0.164819	-0.410401	-0.362735	-0.38617	-0.621317	-0.525058	-0.150762	-0.193257	-0.146372	-0.224872	-0.306413	-0.20361	-0.772186	0.0478464	-0.0826401	-0.221276	0.00572103	-0.11436
1639				3	-0.224042	2.09346	-0.417971	-0.262059	1.05795	-0.222489	-0.175345	-0.387477	0.00132453	-0.133608	-0.934341	-0.565238	-0.423363	-0.185544	-0.477208	-0.312022	-0.380279	-0.790496	-0.0591723	-0.0371132	-0.268253	-0.215416	-0.209181	-0.390879	0.022396	-0.0364958	-0.26459	-0.0751497	-0.303501	-0.0386628	-0.0917395
1639				4	-0.389482	-1.4827	-0.457098	-0.459275	-0.971013	0.0583313	-0.410906	-0.167249	-0.143707	-0.0119923	-0.453739	-0.0202614	-0.212193	-0.176866	-0.378837	0.115833	-0.332798	-0.343891	-0.172626	-0.135304	-0.443577	-0.325689	-0.184272	-0.457009	-0.00228539	0.015607	-0.495206	-0.112663	-0.261054	-0.092956	-0.142105
1639				5	-0.252208	-1.36525	-0.345809	-0.764003	-0.574135	-0.207578	-0.497244	0.163776	-0.479703	0.0195617	-0.492396	-0.223817	-0.285537	-0.109263	-0.209543	-0.248702	-0.271067	-1.33571	-0.281757	-0.0589619	-0.618306	-0.378327	-0.22499	-0.451267	-0.0547632	-0.0415165	-0.311625	-0.209075	-0.00155061	0.17073	-0.106029
1639				6	-0.322374	-1.4953	-0.364911	-0.384067	-0.730975	-0.530136	-0.612278	-0.216105	-0.264951	-0.00937182	-0.156041	0.0320341	-0.251224	-0.14087	-0.122946	0.380038	-0.303344	0.199418	-0.158237	0.10536	-0.495543	-0.191634	-0.184484	-0.200516	-0.0528859	0.142487	0.0204643	-0.00779317	-0.217307	0.240637	-0.0694536
1639				7	-0.219015	-2.72857	-0.406675	-0.529981	-1.16271	-0.343112	-0.666898	0.00413536	-0.285418	-0.0249123	-0.0453327	0.252822	-0.166151	0.000767199	-0.250791	0.274236	-0.340003	0.00109968	-0.20423	-0.0486701	-0.184017	-0.112564	-0.23355	-0.236319	0.0662794	0.0756948	0.162898	-0.00397593	-0.0578302	0.161618	-0.0202892
1639				8	-0.25699	-2.3972	-0.440878	-0.840828	-0.981565	-0.0837848	-0.631029	-0.368067	-0.27284	-0.0285242	-0.0871437	-0.150481	-0.0648827	0.0137138	-0.177602	-0.128758	-0.206133	0.434371	-0.223978	-0.0118874	-0.0692631	-0.118422	-0.201095	-0.236303	-0.0321796	-0.0393631	0.370526	-0.0239607	-0.302418	0.210626	-0.138304
1639				9	-0.347401	-0.587099	-0.317242	-0.457178	-0.568064	-0.153101	-0.433588	-0.125754	-0.465915	-0.188066	0.142938	-0.153188	-0.00425084	-0.0803613	-0.0630349	-0.135961	-0.221639	0.417204	-0.062752	-0.208489	-0.3082	-0.114351	-0.186644	-0.0109603	-0.0354985	-0.268285	0.433486	0.0376881	-0.0977962	0.383215	-0.181429
1639				10	-0.25288	0.72211	-0.270416	-0.519367	0.206729	-0.377368	-0.110795	-0.256803	-0.254837	-0.328292	-0.913812	-0.472302	-0.756873	-0.112688	-0.233459	-0.406102	-0.238911	-0.45349	-0.0702228	-0.050828	-0.453407	-0.175031	-0.124879	-0.256374	-0.0144796	-0.0155375	0.244617	-0.0266202	-0.380985	0.240841	-0.112068
1639				11	-0.303183	-0.261324	-0.401812	-1.12002	-0.380458	-0.103267	-0.0498147	-0.655771	-0.00840263	-0.305826	-0.463916	-0.0927275	-0.181518	-0.202704	-0.215608	0.0442856	-0.378798	-0.63377	-0.191545	-0.102431	-0.343289	-0.10663	-0.151978	-0.104261	-0.0234575	-0.12273	-0.0641518	0.0188754	-0.393886	0.0323566	-0.0496747
1639				12	-0.299936	-0.414272	-0.454874	-0.58805	-0.469921	-0.244359	-0.135011	-0.401528	0.201325	-0.323895	-0.379876	-0.0390571	-0.25373	-0.153249	-0.351142	0.0672436	-0.490626	-0.327575	-0.179591	-0.0738734	-0.405951	-0.269816	-0.280466	-0.378689	-0.0200908	-0.126284	-0.210743	0.0768771	-0.199057	0.0394045	-0.146116
1640				1	-0.299016	-1.89095	-0.427775	-0.689611	-1.61109	-0.0148213	0.923692	0.0405413	0.548963	-0.394817	-0.624046	-0.0676998	-0.735793	-0.234765	-0.374374	0.363886	-0.733072	0.21518	-0.12758	-0.043955	-0.34817	-0.0986174	-0.300866	-0.297	-0.052349	-0.202879	-0.393409	0.0432498	0.115565	0.000496483	-0.120528
1640				2	-0.102907	-1.2882	-0.361341	-0.387702	-1.03936	-0.257453	0.394758	-0.130714	0.68428	-0.0829841	-0.623625	-0.424497	-0.534503	-0.241758	-0.426556	-0.13218	-0.29243	-0.292892	-0.269212	-0.181184	-0.403788	-0.153683	-0.214663	-0.421227	-0.129975	-0.400592	-0.0981936	0.0566268	0.181102	0.138652	-0.125076
1640				3	-0.542455	-0.871902	-0.457293	-0.894785	-0.41109	0.00741621	-0.645832	-0.342283	0.861344	0.046327	-0.342001	-0.301847	0.0301122	-0.261601	-0.3521	-0.0779039	-0.221863	0.187041	-0.376055	-0.234811	-0.473089	-0.15432	-0.188651	-0.445364	0.0231303	-0.0593545	-0.208873	-0.0225451	-0.262419	0.169721	-0.0578554
1640				4	-0.28888	-1.7503	-0.333818	-1.08203	-1.07659	-0.188296	-0.107925	-0.0751835	0.496508	0.110393	0.0561244	-0.0181852	0.0983853	-0.241624	-0.408727	-0.215753	-0.207609	-0.771394	-0.17543	-0.180811	-0.617837	-0.307002	-0.219215	-0.668713	0.0668674	-0.0187472	-0.381804	-0.222438	-0.265698	-0.0761981	-0.09157
1640				5	-0.378108	-1.92551	-0.431104	-0.724617	-0.843419	-0.387235	-0.366888	-0.0274873	-0.0240603	-0.0220032	-0.19015	0.0824572	-0.0750802	-0.219492	-0.300948	-0.298397	-0.0914177	-1.75043	-0.383679	-0.253938	-0.731618	-0.411972	-0.161019	-0.368965	0.120664	-0.0522901	-0.356616	-0.20963	-0.216045	-0.327348	-0.21005
1640				6	-0.353939	-0.90538	-0.40096	-0.763454	-0.570184	-0.449511	-0.541876	-0.0597685	0.13182	-0.0677939	-0.0353417	0.129576	-0.088678	-0.187478	-0.179179	0.37884	-0.148893	0.0557921	-0.166317	-0.16646	-0.522656	-0.163415	-0.184791	0.0221442	0.00283251	-0.0828671	-0.195497	-0.068197	-0.326357	-0.152006	-0.192892
1640				7	-0.243005	-1.15622	-0.452521	-0.736095	-0.552224	-0.262915	-0.463561	-0.305469	0.42169	-0.0743774	0.28831	0.440231	0.156702	-0.0884948	-0.0244731	0.508019	-0.267431	-0.204478	-0.38923	-0.0566676	-0.444839	-0.185078	-0.236771	-0.18958	-0.074728	-0.186121	0.00762278	-0.00663478	-0.14231	-0.037565	-0.0796573
1640				8	-0.324054	-1.33894	-0.464233	-0.668762	-0.834117	-0.275657	-0.618904	-0.27381	0.261294	-0.0524424	0.0449745	0.04347	0.0494724	-0.0563431	-0.155797	-0.0953765	-0.207968	-0.37049	-0.210517	0.0138065	-0.706363	-0.189476	-0.244931	-0.297039	-0.0163858	-0.0437509	-0.00541979	-0.0252462	-0.180595	0.0854281	-0.0609192
1640				9	-0.227324	-0.616075	-0.354881	-0.533167	-0.454902	-0.246318	-0.407892	-0.294642	-0.143478	-0.144463	-0.519889	-0.520992	-0.469501	-0.164731	-0.0717096	-0.465799	-0.256415	0.0179687	-0.141021	0.0203561	-0.717768	-0.137757	-0.210577	-0.149316	-0.0211085	-0.107319	0.156442	0.0267132	-0.0327461	0.0586458	-0.0768243
1640				10	-0.380619	-1.65689	-0.374462	-1.00944	-1.18013	-0.361941	-0.34866	-0.0999549	-0.267117	-0.383895	-1.27271	-0.732437	-1.07177	-0.109442	-0.288813	-0.658124	-0.393914	-0.242068	-0.0189628	0.113623	-0.6087	-0.172585	-0.106889	-0.0924815	-0.0756874	0.0809086	0.0395231	-0.00681623	-0.130422	0.23909	-0.0496672
1640				11	-0.22707	-0.848241	-0.460093	-0.655045	-0.530741	-0.460102	-0.230946	-0.0449965	-0.433751	-0.496397	-0.704733	-0.606235	-0.416004	-0.175606	-0.340412	-0.505464	-0.32545	-1.51486	-0.311411	0.0134186	-0.608266	-0.347932	-0.266697	-0.645243	-0.0266542	-0.0911432	-0.225996	-0.121164	-0.310097	0.113352	-0.0344865
1640				12	-0.338316	-2.55051	-0.44528	-0.668747	-1.74644	-0.200889	-0.141268	0.118397	0.421422	-0.3557	-0.665816	-0.245277	-0.33249	-0.189881	-0.386911	0.0231386	-0.384988	0.361444	-0.260741	-0.202289	-0.555649	-0.375115	-0.224145	-0.447807	-0.0342262	-0.104528	-0.141344	-0.0398259	-0.611567	-0.0194677	-0.0973282
1641				1	-0.307441	-2.24966	-0.514409	-0.830356	-1.54952	-0.15513	0.0970191	-0.105338	0.454465	-0.277297	-0.64345	-0.0940772	-0.701081	-0.218507	-0.317879	0.412282	-0.446295	-0.764158	-0.235969	-0.336474	-0.557252	-0.151319	-0.164336	-0.258843	-0.0575656	-0.0698575	-0.111957	-0.063226	-0.0764454	-0.0279802	-0.041425
1641				2	-0.245466	-2.11405	-0.288439	-0.419465	-1.57802	-0.60435	-0.198675	0.357691	0.741868	-0.138765	-0.656918	0.0491152	-0.529115	-0.246787	-0.371012	0.264085	-0.625532	-0.0422715	-0.292932	-0.0402991	-0.488665	-0.119936	-0.312577	-0.405637	0.0349705	0.069869	-0.0995001	0.0570789	-0.365021	-0.00295741	-0.0304925
1641				3	-0.427638	-0.96104	-0.537278	-1.12224	-0.787079	-0.270377	0.0429482	-0.142365	0.409301	-0.119763	-1.86952	-0.773205	-1.35605	-0.170456	-0.385184	-0.458686	-0.578239	-0.520931	-0.195143	-0.112636	-0.698993	-0.197827	-0.256375	-0.504803	-0.0540906	-0.0978104	-0.258405	-0.0512526	-0.368109	-0.0796155	-0.0500753
1641				4	-0.425058	-0.622041	-0.464918	-0.866905	-0.411874	0.0149298	-0.230173	0.0340668	0.0463223	-0.0181053	-0.9032	-0.327512	-0.580538	-0.270881	-0.53333	-0.358761	-0.428739	-2.17042	-0.27786	-0.40208	-0.64235	-0.294799	-0.240758	-0.395434	-0.0165771	0.0415403	-0.410256	-0.167497	-0.668067	-0.218961	-0.108822
1641				5	-0.38532	-0.233628	-0.52469	-0.541148	-0.371534	-0.356493	-0.352188	-0.569977	-0.212621	-0.107657	-0.400261	-0.217882	-0.368446	-0.216553	-0.313354	-0.425791	-0.448054	-4.54366	-0.297661	-0.0658903	-0.644418	-0.388272	-0.252761	-0.391356	-0.159455	-0.252991	-0.438392	-0.256248	-0.196253	-0.403079	-0.138778
1641				6	-0.410453	-1.17514	-0.559649	-0.396569	-0.477414	-0.413735	-0.43136	-0.394007	-0.127612	-0.160106	-1.43351	-0.551311	-0.652635	-0.201026	-0.285464	-0.384784	-0.415744	-1.38989	-0.330352	-0.296441	-0.722912	-0.301005	-0.290855	-0.399056	-0.149154	-0.169077	-0.342579	-0.109144	-0.471458	-0.395725	-0.271305
1641				7	-0.376203	-0.728203	-0.659806	-0.692069	-0.192423	-0.38868	-0.548005	-0.387493	0.212124	-0.115736	-0.843865	-0.414019	-0.391878	-0.342533	-0.128677	-0.472819	-0.240281	-1.22144	-0.162757	0.0149771	-0.585644	-0.185305	-0.238787	-0.17516	-0.0965223	-0.0103352	-0.214801	-0.063365	-0.29975	-0.246561	-0.118289
1641				8	-0.44892	-0.318747	-0.631691	-1.01755	-0.293933	-0.636019	-0.57651	-0.370844	-0.134243	-0.218138	-0.845403	-0.375965	-0.701044	-0.35354	-0.246425	-0.280542	-0.324719	-1.27628	-0.347248	-0.0222109	-0.52416	-0.156794	-0.238664	-0.0683191	-0.148708	-0.105378	-0.198907	0.0343889	-0.337839	-0.057089	-0.0126499
1641				9	-0.45619	-0.411164	-0.452887	-0.975496	-0.291606	-0.482423	-0.483158	-0.190831	-0.49784	-0.18046	-1.17967	-0.782283	-0.580619	-0.272786	-0.331761	-0.58077	-0.345725	-1.02019	-0.328655	-0.052599	-0.588334	-0.221921	-0.22191	0.0496782	-0.0698833	0.0826732	-0.141472	-0.0207816	-0.232985	0.0837789	-0.121283
1641				10	-0.355736	-0.374809	-0.494712	-1.05152	-0.383369	-0.216623	-0.406829	0.0447065	-0.890984	-0.391068	-1.16255	-0.742107	-1.07375	-0.28462	-0.298845	-0.610871	-0.535963	-0.595507	-0.408081	-0.0102339	-0.716112	-0.194373	-0.135219	-0.0746459	-0.027688	-0.00284885	0.0525637	0.0263793	-0.660352	0.122468	-0.092903
1641				11	-0.333603	-0.577106	-0.611429	-0.844057	-0.207957	-0.388453	-0.963978	-0.58583	-0.839351	-0.214218	-0.492496	-0.217922	-0.381456	-0.20063	-0.301046	-0.0734995	-0.395737	-0.479359	-0.537721	0.0305543	-0.903401	-0.330352	-0.296063	-0.280723	-0.0611934	-0.0678878	-0.143345	0.0812266	-0.509075	-0.347702	-0.0916574
1641				12	-0.495346	-1.36609	-0.646454	-1.30606	-0.740787	-0.182679	-0.5313	-0.427862	-0.309558	-0.644098	-0.880007	-0.537614	-1.06822	-0.174628	-0.545474	-0.344377	-0.779252	0.0376521	-0.804381	0.00298131	-0.979508	-0.450604	-0.351543	-0.49737	0.0870507	-0.04105	-0.639831	0.0279154	-0.507029	-0.587146	-0.135027
1642				1	-0.324275	0.912856	-0.560742	-1.11519	0.143807	-0.106505	0.139309	-0.238512	0.0245279	-0.414607	-0.805412	-0.472628	-0.778186	-0.176337	-0.484257	-0.322939	-0.639257	-0.707357	-0.299692	-0.458635	-0.584857	-0.218613	-0.298817	-0.470444	0.0818597	0.025138	-0.337312	-0.0638192	-0.249141	-0.241495	-0.0535348
1642				2	-0.333147	-2.52096	-0.530361	-0.976842	-2.14816	0.255795	1.09704	-0.00264074	0.443414	-0.294112	-0.886672	-0.482391	-0.615208	-0.257852	-0.549388	-0.186718	-0.739126	-0.509897	-0.420046	-0.274318	-0.512476	-0.221365	-0.283326	-0.416057	0.253627	0.201938	-0.309696	-0.0473408	-0.187218	-0.230338	-0.0782963
1642				3	-0.426988	0.408118	-0.550751	-0.995442	0.0675848	-0.226375	-0.364574	0.0762864	0.377477	-0.159279	-1.43743	-0.594182	-0.887272	-0.27941	-0.579953	-0.216225	-0.620697	-0.450105	-0.233132	-0.106144	-0.421542	-0.123387	-0.200741	-0.402254	0.10581	-0.0206753	-0.154452	0.00739269	-0.203751	-0.243502	0.00121708
1642				4	-0.465064	-1.07364	-0.542585	-1.00899	-0.690899	-0.258917	-0.333497	-0.0727448	0.271355	0.131862	-1.2168	-0.624087	-0.674134	-0.332601	-0.652006	-0.609194	-0.224392	1.61501	-0.287346	-0.0198865	-0.437838	-0.331018	-0.277017	-0.62794	-0.106459	-0.201577	-0.225463	-0.247539	-0.302228	-0.0501132	-0.249186
1642				5	-0.348088	-1.74008	-0.533332	-0.919493	-0.999652	-0.265659	-0.557133	0.0682689	-0.0767413	0.00180047	-0.778259	-0.348671	-0.43773	-0.344227	-0.37083	-0.374738	-0.134028	0.258552	-0.172354	0.014327	-0.39836	-0.319979	-0.277289	-0.463164	-0.0650705	0.096052	-0.295533	-0.222978	-0.445606	-0.279809	-0.234544
1642				6	-0.332695	-0.734932	-0.606265	-0.831281	-0.652906	-0.439915	-0.914917	-0.169	-0.245345	-0.254283	-0.728884	-0.217427	-0.329824	-0.270349	-0.258588	-0.0308331	-0.562356	-0.855834	-0.365547	0.0111099	-0.320527	-0.209034	-0.258205	-0.186464	-0.0222291	-0.123606	-0.293644	-0.0929391	-0.277732	-0.227054	-0.0929312
1642				7	-0.334676	-1.3843	-0.599031	-0.965818	-0.701028	-0.480493	-0.913736	-0.112558	-0.0158253	-0.179758	-1.08857	-0.405684	-0.526457	-0.143848	-0.312542	-0.424288	-0.356298	-0.112031	-0.306797	-0.0548242	-0.0746305	-0.193649	-0.27542	-0.136189	-0.054143	-0.0608532	-0.0224904	-0.0332251	-0.181037	-0.10704	-0.153819
1642				8	-0.381774	-0.307186	-0.533388	-0.871668	-0.386227	-0.305509	-0.643723	0.133373	-0.0761603	-0.187061	-0.734101	-0.215201	-0.534489	-0.291155	-0.234336	-0.228795	-0.328951	1.01154	-0.325114	-0.0394762	-0.312097	-0.172457	-0.298472	-0.275287	0.0309708	-0.0804693	0.0612573	-0.0807196	-0.463704	0.00949084	-0.178427
1642				9	-0.347849	-0.482678	-0.471636	-0.613184	-0.410881	-0.549877	-0.414097	-0.303353	-0.414688	-0.263794	-0.65413	-0.597526	-0.757928	-0.326985	-0.334954	-0.685629	-0.42097	0.65791	-0.489004	0.0453987	-0.472335	-0.195319	-0.205267	-0.0851676	-0.0854777	0.00202862	0.11964	-0.0170089	-0.0693882	-0.107572	-0.128321
1642				10	-0.366177	0.166468	-0.381532	-0.957945	-0.168008	-0.300746	-0.276311	-0.135833	-0.424302	-0.357655	-1.11669	-0.6667	-0.920948	-0.148777	-0.323769	-0.712291	-0.448122	-0.4951	-0.485941	-0.0165596	-0.357698	-0.0720414	-0.115459	-0.0608138	-0.000844002	-0.196599	0.16327	0.0762526	-0.288843	0.0136075	-0.0475653
1642				11	-0.354616	-0.12828	-0.548708	-0.981205	-0.235008	-0.593656	-0.395005	-0.219087	-0.681432	-0.268065	-0.200531	-0.268479	-0.152157	-0.229984	-0.260169	-0.264705	-0.39293	-0.360235	-0.265922	0.150335	-0.61492	-0.1315	-0.261511	-0.276781	-0.0874051	0.0508704	0.066759	0.072943	-0.416824	-0.305225	-0.1371
1642				12	-0.352611	-0.187853	-0.502392	-0.552235	-0.566486	-0.334296	0.565577	-0.159433	0.365893	-0.311382	-0.888049	-0.620565	-0.926515	-0.197005	-0.240188	-0.408185	-0.680783	-0.320624	-0.181478	0.0410196	-0.502076	-0.185965	-0.204021	-0.15329	-0.0657642	-0.061267	-0.270509	0.0798735	-0.610483	-0.441015	-0.176016
1643				1	-0.440118	3.41963	-0.614197	-1.1271	1.44275	-0.415507	0.287678	0.179144	0.607057	-0.244209	-0.691396	-0.368865	-0.517547	-0.281423	-0.360931	-6.62486e-05	-0.69782	-0.456146	-0.279294	-0.423995	-0.493247	-0.174049	-0.300889	-0.289658	0.0462533	-0.158269	-0.754031	-0.000172869	-0.108445	-0.535236	-0.178897
1643				2	-0.262211	0.225108	-0.444387	-0.631472	-0.00269276	-0.278447	-1.1126	0.0583234	0.422363	-0.171851	-1.03861	-0.697735	-0.528249	-0.171319	-0.377236	-0.536154	-0.379729	-0.351599	-0.029781	-0.244304	-0.670489	-0.167652	-0.286645	-0.45424	0.0707275	0.135382	-0.73434	0.00800279	-0.0359866	-0.702804	-0.134283
1643				3	-0.328973	-0.856323	-0.495007	-1.17118	-0.74802	-0.146566	-0.269653	-0.331982	0.136231	-0.135878	-1.1527	-0.268102	-1.22009	-0.197329	-0.477147	0.0826744	-0.827692	-0.651471	-0.137391	-0.211015	-0.424562	-0.129835	-0.300717	-0.449559	-0.0284444	-0.192633	-0.535876	0.0252131	-0.136711	-0.284747	-0.110561
1643				4	-0.623674	-2.21881	-0.59308	-0.64284	-1.20287	-0.134666	-0.668419	-0.227363	0.201498	0.00163002	-1.18802	-0.600936	-0.776891	-0.325618	-0.433271	-0.340178	-0.548069	-0.617581	0.0576862	0.242404	-0.749997	-0.333505	-0.319516	-0.599295	0.038242	-0.109548	-0.512021	-0.292352	-0.190496	-0.149368	-0.274651
1643				5	-0.38946	-1.22662	-0.549896	-0.740179	-0.620177	-0.208209	-0.632128	-0.042764	0.0191163	-0.0696393	-0.743484	-0.469455	-0.505319	-0.171753	-0.421087	-0.583153	-0.380253	-0.885224	-0.249333	-0.211112	-0.602311	-0.278258	-0.304917	-0.476599	-0.127291	-0.222279	-0.236817	-0.178621	-0.301752	0.0150803	-0.142883
1643				6	-0.328735	0.420822	-0.561789	-0.519435	-0.2848	-0.247172	-0.590959	-0.238041	0.33709	-0.176597	-0.540129	-0.320431	-0.364948	-0.219957	-0.463675	-0.222275	-0.293308	-1.57019	-0.145428	-0.000105349	-0.355751	-0.164866	-0.203199	-0.20188	-0.0374936	-0.14192	-0.172971	-0.0428045	-0.18729	0.105536	-0.0595144
1643				7	-0.381807	-0.793877	-0.546718	-0.800286	-0.578155	-0.416552	-0.840486	-0.290092	0.625227	-0.0780472	-0.310302	-0.50881	-0.260737	-0.141321	-0.332592	-0.376832	-0.26649	-0.566668	-0.176721	-0.158785	-0.245422	-0.122972	-0.18369	0.0110753	0.00252819	0.00917746	-0.0460996	-0.0418349	-0.129834	0.112269	-0.143283
1643				8	-0.415752	-0.297558	-0.530968	-0.841499	-0.357125	-0.711954	-0.768257	-0.517342	0.223688	-0.106075	-0.557967	-0.260371	-0.293919	-0.192438	-0.19625	-0.217931	-0.371834	-1.72083	-0.2343	-0.167534	-0.353922	-0.0774613	-0.262252	0.0196764	-0.0295895	-0.193756	0.149539	0.00495663	-0.193065	0.0851973	-0.102482
1643				9	-0.437693	-0.877456	-0.395672	-0.936405	-0.5929	-0.337828	-0.597336	-0.185865	-0.410629	-0.165077	-0.536153	-0.349763	-0.39854	-0.244809	-0.196299	-0.319277	-0.401174	0.21471	-0.275498	-0.0286494	-0.90541	-0.243793	-0.277794	-0.154315	-0.0995988	-0.299031	0.33221	-0.0514747	-0.210273	0.128731	-0.220104
1643				10	-0.35569	-0.0365419	-0.380893	-1.1916	-0.216088	-0.323435	-0.225981	0.320358	-0.455063	-0.338805	-0.602975	-0.423172	-0.507496	-0.161907	-0.274363	-0.497426	-0.226267	-0.565547	-0.302664	-0.204027	-0.695047	-0.0901726	-0.193788	-0.0352439	-0.00800991	-0.16624	0.224828	0.0604293	-0.0599018	0.174611	-0.0410899
1643				11	-0.35664	-0.554754	-0.434868	-1.06711	-0.584295	-0.378605	-0.49902	-0.106524	-0.369315	-0.107525	-0.324496	-0.264175	-0.275631	-0.170607	-0.189496	-0.273752	-0.360003	-0.828733	-0.125921	-0.0130477	-0.710614	-0.168588	-0.243771	-0.197401	-0.0804986	-0.162205	-0.0493241	0.0848239	-0.436455	0.143917	-0.150688
1643				12	-0.498785	-4.40774	-0.513616	-1.28013	-2.95963	-0.170553	-0.609748	-0.255301	0.262427	-0.265852	-0.36803	-0.0694131	-0.468545	-0.209756	-0.35909	0.142998	-0.648667	-0.347524	-0.272641	0.0167285	-0.736462	-0.200621	-0.312542	-0.448439	-0.0960319	-0.148615	-0.420618	0.109249	-0.346233	-0.205905	-0.152309
1644				1	-0.251124	-1.17048	-0.444644	-0.628245	-0.715212	-0.293506	-0.939385	-0.250401	0.687085	-0.227746	-0.729452	-0.233321	-0.581147	-0.248712	-0.35029	0.18151	-0.652389	-0.20237	-0.051618	-0.166544	-0.499419	-0.0864009	-0.296622	-0.43969	0.0189439	0.199997	-0.57372	0.0489433	-0.150111	-0.214345	-0.109292
1644				2	-0.483379	0.512625	-0.541611	-1.02923	0.255426	-0.0989833	-0.725598	0.099308	1.02591	0.0703267	-0.472092	0.138866	-0.60409	-0.273711	-0.270543	0.316123	-0.574622	0.376373	-0.454349	-0.481332	-0.426835	-0.153106	-0.207103	-0.318864	0.0788414	0.0719671	-0.295335	-0.0532727	-0.178923	-0.115171	-0.122421
1644				3	-0.244783	0.821821	-0.375475	-1.134	0.381759	-0.275282	-0.610112	0.134927	1.0415	0.0954145	-0.55217	-0.311238	-0.236216	-0.226258	-0.375396	-0.246097	-0.141445	-0.603938	-0.154549	-0.163013	-0.486072	-0.232319	-0.257676	-0.504408	-0.0775815	-0.168253	-0.470588	-0.0970308	-0.314028	-0.138049	-0.117845
1644				4	-0.557086	-0.481977	-0.55635	-1.35734	-0.599813	-0.268507	-0.298407	0.0076116	0.370093	0.0247509	-0.565117	-0.550906	-0.395177	-0.242574	-0.488966	-0.673925	-0.397877	-0.33146	-0.227026	-0.246207	-0.744656	-0.303722	-0.404075	-0.644267	-0.0247177	-0.136254	-0.287377	-0.186735	-0.282655	-0.0957656	-0.259634
1644				5	-0.359197	-0.266121	-0.410804	-0.66909	-0.250445	-0.377239	-0.58457	-0.0206336	0.117902	-0.113123	-0.811977	-0.354072	-0.453531	-0.279887	-0.377656	-0.449301	-0.453392	-0.443544	-0.341211	-0.16849	-0.712365	-0.347939	-0.216195	-0.43626	-0.021932	-0.22657	-0.195493	-0.283521	-0.420788	-0.16138	-0.250948
1644				6	-0.312915	-0.372083	-0.493468	-0.539983	-0.337645	-0.43191	-0.675173	0.162817	0.327216	-0.102912	-0.492648	-0.325154	-0.372182	-0.244863	-0.320811	-0.284597	-0.37676	-0.976677	-0.245802	-0.0791688	-0.462618	-0.206894	-0.284408	-0.214884	-0.113351	-0.299466	-0.29664	-0.127069	-0.356616	-0.18922	-0.208524
1644				7	-0.409668	-0.0744039	-0.495629	-0.776877	-0.268574	-0.480948	-0.562766	-0.287297	0.85384	-0.156605	-0.620173	-0.594885	-0.316643	-0.157302	-0.253517	-0.42759	-0.283418	-0.497636	-0.377996	-0.177205	-0.473066	-0.172886	-0.258402	-0.202134	-0.10995	-0.281605	-0.0509881	-0.0558234	-0.103732	-0.0353544	-0.103871
1644				8	-0.377444	-0.447178	-0.517986	-1.10546	-0.326561	-0.66319	-0.641901	-0.273139	0.444382	-0.100334	-0.429292	-0.403548	-0.296616	-0.340279	-0.375609	-0.346814	-0.33231	0.0288931	-0.354869	0.0807287	-0.599357	-0.166136	-0.31545	-0.19602	0.037019	0.116177	0.0104951	-0.0578524	-0.0329989	0.118263	-0.0948605
1644				9	-0.355853	0.0553949	-0.570416	-0.992852	-0.0114264	-0.516432	-0.478592	-0.241482	-0.269798	-0.193342	-0.250399	-0.386159	-0.247747	-0.217156	-0.240424	-0.462397	-0.356275	-0.273519	-0.34379	-0.23498	-0.590762	-0.0842964	-0.29077	-0.209614	0.136314	-0.128128	0.15563	0.0232667	-0.174399	-0.0328517	-0.112557
1644				10	-0.460627	-0.0516529	-0.488717	-1.07405	-0.149154	-0.35526	-0.419562	0.0360472	-0.473507	-0.264166	-0.35456	-0.43287	-0.302542	-0.220432	-0.228821	-0.457813	-0.349837	-0.453948	-0.3808	-0.318737	-0.850058	-0.076619	-0.215661	0.0342274	0.0450268	-0.0400021	0.20843	-0.0596841	-0.230995	0.120999	-0.172535
1644				11	-0.39086	0.474293	-0.496567	-1.05472	0.305798	-0.661309	-0.658946	-0.42616	0.0217182	-0.390843	-0.373143	-0.402444	-0.468531	-0.171831	-0.279613	-0.342848	-0.638226	-0.537063	-0.351637	0.00378176	-0.790179	-0.146925	-0.298476	-0.225098	-0.0220537	-0.20569	-0.199942	0.0277636	-0.29462	0.0485996	-0.145988
1644				12	-0.428886	0.247906	-0.613354	-1.19175	-0.0753992	-0.292344	-0.371065	-0.470323	0.216151	-0.412184	-0.590072	-0.193315	-0.645956	-0.18549	-0.448467	0.110409	-0.630469	-0.602268	-0.236838	0.189018	-0.717833	-0.316136	-0.410102	-0.391016	0.0351632	-0.134648	-0.544342	-0.00402501	-0.487806	-0.102466	-0.248846
1645				1	-0.163407	0.048728	-0.428183	-0.537742	0.171558	-0.308963	-1.77473	-0.412347	0.643941	-0.143901	-0.524052	-0.0553924	-0.441645	-0.2159	-0.494964	0.164036	-0.383198	-1.06809	-0.339336	-0.641552	-0.669444	-0.171184	-0.330769	-0.340491	-0.0107611	0.127848	-0.481845	0.064862	-0.264693	-0.115878	-0.177486
1645				2	-0.15987	3.04501	-0.331158	-0.344164	2.23719	-1.08203	-1.33132	-0.234139	0.921564	-0.112115	-0.286757	-0.124218	-0.350292	-0.302392	-0.385268	-0.254528	-0.605089	-0.522743	-0.171016	-0.157793	-0.50747	-0.215677	-0.266244	-0.30808	0.0644867	0.13589	-0.343555	-0.0601983	-0.138455	0.11909	-0.115637
1645				3	-0.462518	1.45933	-0.427018	-1.27685	0.682581	-0.398188	-0.528658	-0.354272	0.756305	0.0951284	-0.199564	-0.190997	0.289029	-0.212531	-0.316276	-0.336158	0.126488	-0.0398823	-0.423733	-0.217518	-0.623891	-0.301728	-0.233649	-0.501219	-0.312069	-0.296572	-0.436362	-0.123665	-0.167397	-0.104104	-0.156019
1645				4	-0.54717	-0.040838	-0.467546	-1.20878	-0.463134	-0.107146	-0.305974	-0.322045	0.486771	0.0443336	-0.400242	-0.170824	-0.148252	-0.300082	-0.350524	-0.0975619	-0.13456	1.12224	-0.314703	-0.107752	-0.817309	-0.325012	-0.244476	-0.459533	-0.0187325	-0.137109	-0.393569	-0.220804	-0.473601	-0.315284	-0.209053
1645				5	-0.465646	-0.328221	-0.500135	-0.65472	-0.472618	-0.508082	-0.486792	-0.318167	-0.1058	-0.0864907	-0.574899	-0.17548	-0.339698	-0.201985	-0.188028	-0.236289	-0.32598	0.232986	-0.166883	-0.249785	-0.741975	-0.310357	-0.238959	-0.332647	-0.129214	-0.197307	-0.384183	-0.228858	-0.238226	-0.26801	-0.215753
1645				6	-0.43223	0.0486354	-0.5162	-0.771713	-0.350521	-0.637409	-0.439859	-0.285141	0.212024	-0.147166	-0.216898	-0.163065	-0.291172	-0.122472	-0.13222	-0.140616	-0.329072	-1.38437	-0.201954	-0.0553765	-0.274971	-0.168866	-0.208131	-0.165739	-0.150144	-0.171179	-0.088184	-0.10469	-0.245211	-0.178367	-0.130779
1645				7	-0.371639	-0.351347	-0.52613	-0.826534	-0.270466	-0.339566	-0.475505	-0.443759	0.372314	-0.0518497	0.0951703	0.0698181	-0.202202	-0.114402	-0.129516	0.184932	-0.377557	0.0750514	-0.416036	-0.329925	-0.0769822	-0.235193	-0.323058	-0.159825	-0.197535	-0.361381	0.202239	-0.0898619	-0.0906881	-0.0969636	-0.212043
1645				8	-0.385707	-0.634321	-0.542763	-1.21276	-0.450053	-0.357388	-0.362807	-0.141567	0.0767862	-0.142553	-0.335843	-0.216799	-0.208775	-0.224333	-0.249898	-0.157753	-0.312836	-0.138986	-0.274245	-0.0885743	-0.471584	-0.168663	-0.306613	-0.175781	-0.156711	-0.278485	0.344548	-0.0447546	-0.266943	0.127376	-0.16259
1645				9	-0.388035	-0.873533	-0.428726	-0.800936	-0.509393	-0.408481	-0.56624	-0.290025	-0.387462	-0.243576	-0.521619	-0.261287	-0.483842	-0.242654	-0.183419	-0.356478	-0.430472	-0.689529	-0.285242	-0.146868	-0.466498	-0.161384	-0.268599	-0.179003	-0.131733	-0.218475	0.284154	0.0208234	0.235023	0.290465	-0.270824
1645				10	-0.439978	-0.421121	-0.459798	-1.03495	-0.314251	-0.393911	-0.460089	-0.138058	-0.57732	-0.306975	-0.489989	-0.3219	-0.396126	-0.176674	-0.122845	-0.376783	-0.429848	-0.368447	-0.0780162	-0.0240736	-0.685818	-0.222897	-0.266479	-0.150705	-0.0440216	-0.192208	0.182097	-0.0567125	-0.186422	0.187874	-0.192667
1645				11	-0.374771	-0.070557	-0.534811	-0.604588	-0.0748785	-0.426276	-0.463429	-0.839236	-0.225299	-0.373119	-0.302746	-0.592232	-0.149383	-0.232407	-0.254114	-0.707351	-0.398913	-0.758723	-0.23773	-0.0116096	-1.02013	-0.34044	-0.326407	-0.267309	0.0107423	-0.0496069	-0.236328	-0.0119359	-0.462812	-0.269949	-0.20739
1645				12	-0.338674	0.786471	-0.5702	-0.791484	0.373458	-0.365321	-0.626919	-0.672362	-0.311483	-0.58415	-0.821445	-0.504981	-0.764049	-0.236323	-0.329152	-0.319276	-0.554608	-0.953373	-0.420608	-0.380775	-0.791831	-0.354607	-0.398059	-0.371244	0.0896695	0.0695066	-0.484947	-0.0597902	-0.517424	-0.388175	-0.189789
1646				1	-0.258916	-2.93213	-0.440989	-0.589235	-1.92628	-0.115481	-0.680473	-0.644082	-0.113145	-0.400117	-0.600011	-0.447359	-0.718065	-0.20923	-0.351911	-0.138886	-0.674324	-1.06738	-0.209676	-0.72576	-0.529498	-0.2085	-0.343161	-0.399365	-0.0223807	-0.114831	-0.394126	-0.0831731	-0.191174	-0.174892	-0.143985
1646				2	-0.311943	-0.308995	-0.465761	-1.12167	-0.439051	0.149857	0.152437	-0.181711	0.181852	-0.107459	-0.919007	-0.908408	-0.755901	-0.186929	-0.376902	-0.565987	-0.43975	-0.815149	-0.234928	-0.583431	-0.360259	-0.257517	-0.312322	-0.360658	0.0220177	-0.0646163	-0.314939	-0.113202	-0.0739123	-0.128427	-0.170711
1646				3	-0.36507	-0.00719003	-0.546328	-0.997096	-0.0736152	0.0210361	-0.471525	-0.50739	0.0612744	-0.00164661	0.490698	-0.544934	1.50372	-0.198813	-0.281547	-0.526085	0.496527	-0.379191	-0.141581	-0.0671902	-0.365258	-0.294712	-0.372107	-0.447989	-0.0276185	-0.183608	-0.344899	-0.166287	-0.0479605	-0.108363	-0.149578
1646				4	-0.198924	0.0501063	-0.533407	-0.253444	-0.0121186	-0.363278	-0.255272	-0.306041	-0.0239235	-0.115264	-0.603001	-0.526492	-0.245495	-0.348789	-0.392118	-0.421304	-0.355274	-0.179084	-0.280922	-0.220328	-0.574391	-0.363261	-0.387284	-0.439767	-0.23765	-0.236423	-0.393668	-0.241989	-0.190347	-0.195892	-0.246454
1646				5	-0.478024	-0.351022	-0.495164	-0.475898	-0.443534	-0.214607	-0.581404	-0.358087	-0.185664	0.0721664	-0.442117	-0.350044	-0.433824	-0.232434	-0.141374	-0.516353	-0.229906	0.211324	-0.0593089	-0.18708	-0.522849	-0.274781	-0.298345	-0.264609	-0.252785	-0.332856	-0.135806	-0.18959	-0.298948	-0.0173198	-0.274835
1646				6	-0.363649	-1.06336	-0.521826	-0.603605	-0.432249	-0.454484	-0.526909	-0.382137	0.264434	-0.123374	-0.117106	-0.207428	-0.173498	-0.14537	-0.133961	-0.353343	-0.367057	-0.714234	-0.190778	-0.0233025	-0.453085	-0.181214	-0.214856	-0.050213	-0.10934	-0.104701	-0.224763	-0.0663965	-0.170819	-0.0956987	-0.1588
1646				7	-0.39044	0.331291	-0.485372	-0.631188	-0.191143	-0.336961	-0.514838	-0.304484	0.560699	-0.033482	-0.607016	-0.843607	-0.420815	-0.100103	-0.0514945	-0.97925	-0.293287	0.0316154	-0.206125	-0.0944646	-0.259903	-0.122482	-0.286643	-0.0630958	-0.133769	-0.143846	-0.00476926	-0.0274401	-0.117257	-0.0345189	-0.132802
1646				8	-0.423227	-0.339176	-0.520817	-0.848865	-0.277231	-0.443859	-0.441755	-0.352375	0.208796	-0.218847	-0.334472	-0.221329	-0.0198483	-0.257862	-0.0982428	-0.236891	-0.346964	-0.0629553	-0.392059	-0.158349	-0.331318	-0.0346203	-0.308154	-0.124498	-0.229728	-0.247091	0.114116	0.0507559	0.0018932	0.0421828	-0.0456699
1646				9	-0.38308	-0.428781	-0.495758	-0.973562	-0.213868	-0.481183	-0.358934	-0.38927	-0.21912	-0.25338	-0.724282	-0.485906	-0.395982	-0.121291	-0.210683	-0.410943	-0.353806	-0.737429	-0.435914	-0.123937	-0.680352	-0.177736	-0.310188	-0.0894744	-0.181492	-0.261297	-0.0119215	-0.0379096	0.0748245	0.180811	-0.131422
1646				10	-0.462603	-0.0229263	-0.405691	-0.774594	-0.109825	-0.394512	-0.513709	-0.0356458	-0.365094	-0.410563	-0.593702	-0.377271	-0.523045	-0.193045	-0.275736	-0.337857	-0.441704	-0.00243425	-0.444639	-0.270601	-0.709698	-0.297387	-0.274843	-0.351414	-0.0805387	-0.455778	0.00846577	-0.0463746	0.116228	0.12016	-0.146049
1646				11	-0.29825	0.425737	-0.438772	-1.07471	0.204905	-0.468437	-0.528277	-0.343539	0.081424	-0.354504	-0.368657	-0.206303	-0.408238	-0.211048	-0.272506	-0.0835757	-0.474337	-0.289904	-0.18173	-0.23023	-0.504178	-0.260713	-0.363648	-0.494354	-0.0582933	-0.268756	-0.15839	0.0606082	-0.313623	-0.242994	-0.104242
1646				12	-0.39204	1.93765	-0.42696	-1.01705	0.65954	-0.232215	-0.0527104	-0.339976	0.296395	-0.288908	-0.731855	-0.495116	-0.637792	-0.188409	-0.265197	-0.230086	-0.629113	-0.68078	0.281754	-0.363854	-0.451617	-0.313654	-0.404714	-0.471454	-0.126422	-0.169783	-0.497936	-0.0100999	-0.273695	-0.0725111	-0.226089
1647				1	-0.284903	-0.0878534	-0.349423	-0.793637	-0.535198	-0.111343	0.58718	-0.121103	0.540817	-0.256603	-0.783453	-0.329497	-0.572073	-0.197437	-0.44099	-0.0381732	-0.544119	-0.367929	0.0352655	-0.816384	-0.304404	-0.203195	-0.306538	-0.442618	-0.041746	-0.372412	-0.496824	0.0261543	-0.356131	-0.0938581	-0.140752
1647				2	-0.23888	-0.202664	-0.352165	-0.836315	-0.390352	-0.0547223	0.286994	-0.315568	0.333112	-0.0495483	-0.813038	-0.142804	-0.615768	-0.184663	-0.416165	0.493552	-0.446263	0.182138	-0.236086	-1.32308	-0.181037	-0.137077	-0.269746	-0.413066	0.0813972	0.0542125	-0.302324	-0.000919787	-0.334252	-0.0895224	-0.166794
1647				3	-0.336446	0.131867	-0.461041	-0.875601	-0.138694	-0.153791	0.121313	-0.45726	0.273591	-0.100596	-0.725014	-0.116533	-0.600717	-0.190985	-0.492376	0.0915307	-0.666368	-0.361578	-0.0451323	-0.322633	-0.32734	-0.208922	-0.203732	-0.252274	-0.178013	-0.177782	-0.23355	-0.109089	-0.0170538	-0.0211915	-0.135937
1647				4	-0.238452	-0.554241	-0.538294	-0.741496	-0.515632	-0.226123	-0.13555	-0.119179	-0.165672	0.0407459	0.394811	0.0892798	0.164868	-0.30309	-0.342512	0.0751461	-0.314628	-0.518117	-0.214531	-0.196222	-0.669991	-0.353645	-0.344455	-0.286982	-0.161772	-0.258059	-0.362216	-0.333019	-0.456649	-0.097198	-0.158842
1647				5	-0.262427	-0.614765	-0.418914	-0.487238	-0.317731	-0.599166	-0.487246	-0.295534	-0.0804759	-0.0469151	-0.552812	-0.274575	-0.347829	-0.192328	-0.385368	-0.268912	-0.449782	0.215728	-0.123802	-0.230749	-0.573214	-0.255957	-0.26364	-0.408812	-0.123247	-0.132491	-0.276338	-0.153514	-0.400034	-0.290559	-0.200016
1647				6	-0.493005	-0.999949	-0.422747	-0.464935	-0.552939	-0.384671	-0.554306	-0.520352	0.0189294	-0.0883589	-0.421931	-0.244286	-0.316143	-0.131482	-0.210175	-0.0447033	-0.377649	-0.927933	-0.15195	-0.230471	-0.274556	-0.166512	-0.234704	-0.125233	-0.249096	-0.370766	-0.138853	-0.111541	-0.266462	-0.0174822	-0.248144
1647				7	-0.346784	-0.731384	-0.433692	-0.612598	-0.453262	-0.355247	-0.651099	-0.318742	0.24844	-0.15577	-0.0585677	0.109178	-0.182551	-0.19828	-0.250364	0.26502	-0.282064	0.339763	-0.117563	-0.229137	-0.155933	-0.130407	-0.290272	-0.107115	-0.138361	-0.034239	0.0879698	-0.0107318	-0.151399	0.0539229	-0.118577
1647				8	-0.310264	-0.757931	-0.442085	-0.547101	-0.462717	-0.542072	-0.548405	-0.0626292	0.241984	-0.155613	-0.424531	-0.26278	-0.295731	-0.268211	-0.322661	-0.17738	-0.344733	-1.17267	-0.104812	-0.109888	-0.134397	-0.119001	-0.320489	-0.0162695	-0.0881165	-0.114447	-0.113343	-0.0130278	-0.105529	-0.0266553	-0.128287
1647				9	-0.365528	0.208134	-0.359697	-0.754654	-0.14919	-0.216502	-0.301477	-0.300804	-0.151351	-0.187742	-0.285662	-0.195804	-0.37259	-0.212764	-0.223603	-0.294465	-0.440429	-0.347535	-0.174896	-0.410358	-0.2508	-0.114722	-0.287579	0.0268625	-0.228954	-0.177083	0.0327524	-0.021495	-0.0704906	0.120354	-0.224291
1647				10	-0.382017	-0.116183	-0.354829	-0.699436	-0.323037	-0.423103	-0.0638014	-0.522697	-0.465905	-0.35213	-0.468358	-0.258938	-0.386725	-0.193392	-0.190193	-0.319895	-0.424307	-0.329116	-0.203951	-0.255997	-0.114166	-0.180056	-0.27552	0.171295	-0.163344	-0.355987	-0.0179338	-0.0482801	-0.0274559	0.180237	-0.168051
1647				11	-0.0356543	1.02315	-0.354488	-0.9685	0.333406	-0.410877	-0.4483	-0.840272	-0.144961	-0.34424	-0.330698	-0.170913	-0.224782	-0.181957	-0.317804	0.00926826	-0.376389	-1.02284	-0.0245396	-0.10222	-0.474896	-0.218196	-0.302252	-0.347154	-0.102181	-0.0681415	-0.230597	-0.0328691	-0.428232	-0.170805	-0.123789
1647				12	-0.269272	0.62466	-0.425121	-1.16683	-0.242492	-0.297883	-0.0593842	-0.236143	0.32796	-0.317131	-0.597991	-0.184709	-0.567562	-0.244574	-0.28383	0.119616	-0.731211	-1.36627	0.0294179	-0.293508	-0.304499	-0.200112	-0.340427	-0.308107	-0.133769	-0.0707102	-0.315351	-0.00933126	-0.440779	-0.224069	-0.190868
1648				1	-0.167472	-1.99896	-0.402373	-1.41692	-2.17159	0.0116174	0.973748	0.2026	0.203746	-0.529321	-0.448821	-0.267974	-0.744018	-0.198983	-0.195951	0.0976377	-0.628548	-0.392822	-0.0868792	-0.329786	-0.224126	-0.19824	-0.254891	-0.216136	-0.0562514	-0.0700387	-0.388389	-0.0637314	-0.385155	-0.269769	-0.170743
1648				2	-0.445673	-1.57046	-0.432449	-0.661328	-1.38228	0.0361714	0.183445	0.170295	0.259366	-0.151319	-0.690553	-0.584828	-0.595401	-0.186578	-0.322226	-0.396938	-0.580107	0.601571	-0.552429	-0.962353	-0.262852	-0.162689	-0.198234	-0.32105	0.0654423	0.0409726	-0.0895723	-0.0474553	-0.150588	-0.116544	-0.121673
1648				3	-0.40759	-0.522527	-0.442717	-0.556507	-0.564298	-0.0246277	-0.344618	-0.646325	0.412236	0.0452894	-0.421581	-0.386386	-0.200592	-0.281689	-0.19618	-0.121839	-0.1835	0.201002	-0.104472	-0.266771	-0.354015	-0.236033	-0.186572	-0.189657	-0.227749	-0.174875	0.00972659	-0.0544912	-0.338135	0.0769931	-0.259476
1648				4	-0.362123	-0.627665	-0.407932	-0.365746	-0.597411	0.234377	-0.42889	-0.358247	0.0975384	0.0268261	0.00821273	-0.186552	-0.126157	-0.296897	-0.168813	-0.278785	-0.361229	-1.0559	-0.254732	-0.237816	-0.492282	-0.227151	-0.340049	-0.249492	-0.246935	-0.276425	-0.308627	-0.185405	-0.257033	0.0290323	-0.15906
1648				5	-0.294711	-0.795029	-0.339221	-0.678825	-0.423931	-0.300663	-0.336783	0.186183	0.0347814	0.0283069	-0.836191	-0.452703	-0.429038	-0.255698	-0.0131257	-0.487914	-0.256773	-1.91398	-0.282	-0.147237	-0.331441	-0.234263	-0.261687	-0.286041	-0.235679	-0.260564	-0.265805	-0.154825	-0.320549	-0.19975	-0.179781
1648				6	-0.279436	-1.41082	-0.460724	-0.654313	-0.536259	-0.572212	-0.511265	-0.287594	0.30345	-0.210607	-0.623007	-0.417906	-0.387331	-0.152486	0.0458864	-0.342086	-0.406948	0.577113	-0.263479	-0.181439	-0.100871	-0.13811	-0.257848	0.0531043	-0.197786	-0.11501	-0.267622	-0.105905	-0.0996534	-0.202365	-0.112567
1648				7	-0.274418	-1.58632	-0.432731	-0.232039	-0.621682	-0.269444	-0.637342	0.0301363	0.412548	-0.288828	-0.395983	-0.383702	-0.450678	-0.316919	0.167803	-0.242611	-0.465967	-0.744252	-0.293114	-0.0836156	-0.33308	-0.186249	-0.347317	-0.268584	-0.229742	-0.0768754	-0.119752	-0.0764285	-0.209661	0.0707953	-0.115885
1648				8	-0.259172	-1.28281	-0.390957	-0.895843	-0.672232	-0.185309	-0.622851	-0.206138	0.128578	-0.246818	-0.64906	-0.377087	-0.354939	-0.247171	-0.0352564	-0.350124	-0.401577	-0.380872	-0.222016	-0.0730751	-0.423521	-0.125141	-0.329803	-0.0735357	-0.176409	-0.331249	-0.176799	0.0186037	-0.00798496	-0.00152028	-0.18981
1648				9	-0.272232	-0.230532	-0.361006	-0.713584	-0.266621	-0.384603	-0.544239	-0.320618	-0.260925	-0.225328	-0.867593	-0.473482	-0.63792	-0.118192	-0.0613527	-0.451804	-0.454587	-0.48495	-0.0797351	-0.0736399	-0.485545	-0.0967838	-0.255716	-0.0913989	-0.189303	-0.138745	-0.273045	-0.00177873	-0.111756	-0.0757308	-0.184439
1648				10	-0.361586	-0.729768	-0.298955	-0.998659	-0.464786	-0.358432	-0.540814	-0.362341	-0.233349	-0.326804	-0.74653	-0.414843	-0.573916	-0.180548	-0.0278758	-0.512407	-0.398192	-0.336996	-0.205481	-0.186935	-0.300869	0.0344783	-0.144937	0.0893651	-0.245284	-0.123927	0.0979452	0.0656687	-0.164833	0.169453	-0.160625
1648				11	-0.339939	0.52166	-0.281288	-0.891487	0.267177	-0.397449	-0.817984	-0.584143	-0.410371	-0.253222	-0.0688361	-0.296106	-0.0942186	-0.121767	0.0677458	-0.254374	-0.365315	-0.518487	-0.349523	-0.140862	-0.66655	-0.0828605	-0.239573	-0.236374	-0.326868	-0.214763	0.139822	0.0725424	-0.47455	-0.0783039	-0.165521
1648				12	-0.238958	0.635083	-0.366207	-0.973001	0.310183	-0.205491	-1.39712	-0.183851	0.0586515	-0.115763	-0.792363	-0.384286	-0.532865	-0.148398	-0.285774	0.000809224	-0.431451	-0.537131	-0.360681	-0.0654534	-0.645655	-0.215056	-0.299102	-0.18791	-0.231919	-0.341478	-0.274727	-0.0434461	-0.612654	-0.148897	-0.213392
1649				1	-0.453145	-1.44876	-0.419787	-0.0199094	-0.72783	-0.109566	-0.55067	0.191236	-0.0633494	-0.425891	-0.580359	-0.211929	-0.635387	-0.172868	-0.3591	0.271173	-0.679868	-0.16297	-0.315431	-0.349344	-0.703284	-0.331217	-0.325311	-0.352404	-0.116838	-0.195815	-0.454274	-0.116439	-0.422866	-0.189168	-0.1972
1649				2	-0.353298	-1.38814	-0.359097	-0.879163	-0.683923	0.293943	-1.04049	-0.396565	-0.00539258	-0.197141	-0.628528	-0.388984	-0.437116	-0.131936	-0.279004	-0.228957	-0.411469	0.0564071	-0.0056626	-0.402159	-0.424403	-0.126901	-0.256385	-0.373736	-0.096072	0.130005	-0.194501	-0.00183341	-0.243821	-0.118526	-0.136112
1649				3	-0.206103	-0.132327	-0.257346	-0.605017	-0.0789167	-0.192846	-0.538457	-0.417261	0.0839623	-0.128104	-0.22937	-0.214622	-0.115311	-0.220629	-0.391475	-0.129254	-0.441139	-0.0302641	-0.370669	-0.204017	-0.621171	-0.175457	-0.233975	-0.320574	-0.232357	-0.228264	-0.321143	-0.0847532	-0.326575	-0.0246743	-0.189268
1649				4	-0.0616008	-0.364147	-0.338211	-1.06167	-0.388205	0.175691	-0.379248	-0.0173387	0.096516	-0.134688	-0.530091	-0.301173	-0.568969	-0.162235	-0.509149	-0.410448	-0.766525	0.442315	-0.300029	-0.341652	-0.493292	-0.216296	-0.344417	-0.351563	-0.178728	-0.212991	-0.286799	-0.134687	-0.40265	-0.168962	-0.192303
1649				5	-0.27962	-1.89489	-0.39447	-0.795845	-0.681948	-0.286257	-0.471176	-0.0839151	-0.0233527	-0.121952	-0.0599025	-0.180188	-0.224508	-0.167576	-0.26468	-0.207761	-0.221022	0.0819062	-0.408492	-0.308675	-0.387845	-0.278918	-0.255937	-0.330696	-0.254031	-0.454776	-0.058751	-0.266492	-0.293831	0.0545224	-0.195779
1649				6	-0.199459	-1.12579	-0.372254	-0.206831	-0.49183	-0.24371	-0.381813	-0.408053	0.313199	-0.0598326	-0.575146	-0.4487	-0.473556	-0.215125	-0.0757929	-0.226284	-0.423046	-0.66265	-0.126805	-0.175268	-0.425379	-0.240227	-0.261577	-0.31152	-0.133465	-0.198743	-0.174533	-0.058706	-0.202918	-0.0215696	-0.0972017
1649				7	-0.244661	-0.849186	-0.392266	-0.347364	-0.448279	-0.177401	-0.475482	-0.614463	0.411892	-0.155688	-0.537446	-0.173991	-0.368912	-0.253166	-0.0456599	-0.0158608	-0.47389	-0.265904	-0.251171	-0.146291	-0.303732	-0.175825	-0.271906	-0.0239322	-0.344917	-0.426442	-0.253722	-0.0756674	-0.17473	-0.0655935	-0.18546
1649				8	-0.236709	-1.03105	-0.377912	-0.502699	-0.566695	-0.570963	-0.429947	-0.561445	0.178738	-0.152769	-0.383529	-0.313404	-0.285704	-0.0845166	-0.218324	-0.255242	-0.350596	-0.619844	-0.338484	-0.136659	-0.196907	-0.1504	-0.288287	-0.173157	-0.243721	-0.243607	-0.155637	-0.0514742	-0.205941	0.0306319	-0.122067
1649				9	-0.216093	-0.979868	-0.271814	-0.430511	-0.475706	-0.0612062	-0.534891	0.0453286	-0.159606	-0.189106	-0.419576	-0.404386	-0.317302	-0.119088	-0.170083	-0.287567	-0.411733	-0.0542149	-0.0791466	-0.173094	-0.404828	-0.0937187	-0.201778	-0.0505988	-0.19628	-0.0487421	-0.0973898	0.0429696	0.0199883	0.155867	-0.17054
1649				10	-0.345953	-0.346132	-0.271497	-0.532608	-0.354296	-0.254054	-0.287202	-0.160505	-0.0607494	-0.309147	-0.0934135	-0.163283	-0.363188	-0.0822048	-0.103138	-0.14091	-0.398699	-0.113445	-0.00530237	-0.18054	-0.395075	-0.0293301	-0.22517	-0.204891	-0.275984	-0.222231	0.0384016	0.0484912	0.0201515	0.118285	-0.0218714
1649				11	-0.201334	-0.146804	-0.294537	-0.501581	-0.179182	-0.266288	0.0622211	-0.281225	0.33018	-0.160339	-0.347219	-0.540627	-0.46547	-0.0418207	-0.0513014	-0.237749	-0.424046	-0.481428	0.139408	-0.222851	-0.516988	-0.0974403	-0.245634	-0.275505	-0.137567	0.057754	-0.220026	0.0850699	-0.0827406	-0.118137	-0.152817
1649				12	-0.425184	0.859221	-0.384991	-0.862636	0.466332	0.0409526	0.0319978	-0.0205995	0.275931	-0.450466	-0.229404	-0.0878197	-0.295699	-0.154917	-0.304176	0.0945492	-0.699094	0.593846	-0.126834	-0.320256	-0.548129	-0.196896	-0.250877	-0.242376	-0.16083	-0.184917	-0.574033	-0.0264039	-0.0651094	-0.273061	-0.156729
1650				1	-0.27007	2.20081	-0.320294	-0.454911	0.575609	-0.319799	1.39895	-0.046161	0.176605	-0.357402	-0.330057	-0.359669	-0.263869	-0.0973885	-0.197824	-0.166608	-0.637682	-0.427649	0.171523	-0.257457	-0.0852441	0.0154497	-0.129527	-0.18413	-0.10403	-0.0197486	-0.731716	-0.0205414	-0.107735	-0.133275	-0.0277264
1650				2	-0.08906	1.76582	-0.324795	-0.568311	0.53847	-0.24072	0.312041	0.194313	-0.18583	-0.190183	-0.0354698	-0.287925	-0.00550625	-0.134658	-0.200297	-0.298459	-0.202589	-0.414754	-0.131164	-0.629291	-0.256754	-0.174442	-0.163041	-0.260646	-0.108224	-0.12351	-0.587053	-0.175602	-0.294905	-0.18727	-0.134384
1650				3	-0.245425	-0.38121	-0.313219	-0.673918	-0.147283	0.132469	-0.385593	-0.00547206	-0.351979	0.0425486	-0.12182	-0.430272	0.285963	-0.140458	-0.292613	-0.171499	0.108704	-0.651523	-0.355727	-0.330418	-0.452266	-0.164521	-0.139889	-0.259955	-0.27437	-0.408146	-0.484527	-0.0900003	-0.521614	-0.14326	-0.0873545
1650				4	-0.104493	-0.452085	-0.22101	-0.138438	-0.410825	-0.26152	-0.326312	-0.447958	-0.50917	-0.0567978	-0.216209	-0.289469	-0.350461	-0.232559	-0.21309	-0.17983	-0.50411	-0.397134	-0.0127846	-0.174387	-0.499022	-0.175954	-0.192224	-0.256001	-0.299179	-0.27533	-0.330914	-0.162883	-0.283448	-0.28412	-0.291611
1650				5	-0.194512	-0.750386	-0.253335	-0.426205	-0.552437	-0.260116	-0.307018	-0.744993	-0.287503	0.00365632	-0.462052	-0.363345	-0.379623	-0.148686	-0.132566	-0.466343	-0.347798	-0.351906	-0.355119	-0.500263	-0.26374	-0.170771	-0.231076	-0.192398	-0.344068	-0.473961	-0.248309	-0.223426	-0.45516	-0.355399	-0.262975
1650				6	-0.183918	-1.01445	-0.306511	-0.422193	-0.650492	-0.282137	-0.41822	-0.554229	0.0567025	-0.235683	-0.685191	-0.379696	-0.431669	-0.150344	-0.0378424	-0.265759	-0.313486	-1.0935	-0.411023	-0.470878	-0.171034	-0.122317	-0.210185	-0.246496	-0.164225	-0.390114	-0.166559	-0.143369	-0.179077	-0.128347	-0.166805
1650				7	-0.197622	-1.04712	-0.312562	-0.218622	-0.576939	-0.213311	-0.498008	-1.03491	0.0552196	-0.14131	0.056905	-0.0334438	-0.2766	-0.133102	-0.120647	0.0502784	-0.368408	-0.138104	-0.393428	-0.488731	-0.0546682	-0.13146	-0.230647	-0.148282	-0.387758	-0.50456	-0.179509	-0.0634814	-0.0521425	-0.155212	-0.180598
1650				8	-0.281356	-0.89608	-0.300825	-0.958679	-0.663949	-0.205008	-0.292614	-0.336606	-0.000385157	-0.120281	-0.355624	-0.416689	-0.38123	-0.152062	-0.191596	-0.32215	-0.269057	-0.196735	-0.37609	-0.250733	-0.283144	-0.0722218	-0.274856	-0.16062	-0.239139	-0.270464	-0.125281	-0.0155951	-0.302302	-0.00620092	-0.114849
1650				9	-0.314867	-0.840879	-0.233013	-0.68539	-0.48142	-0.1996	-0.409998	0.00160452	-0.305625	-0.308189	-0.410458	-0.628719	-0.3856	-0.180749	-0.236422	-0.54851	-0.361163	-0.0859789	-0.0528348	-0.317226	-0.293669	-0.200607	-0.277706	-0.241355	-0.0809182	-0.259861	-0.0420462	-0.124351	-0.255715	0.0721345	-0.24024
1650				10	-0.266121	-0.548255	-0.262521	-0.625999	-0.347763	-0.207111	-0.223826	-0.299183	-0.367379	-0.20813	-0.637081	-0.552246	-0.503169	-0.19013	-0.245617	-0.584626	-0.350262	-0.0595937	-0.173492	-0.390199	-0.24276	-0.271022	-0.232061	-0.261772	-0.0980682	-0.242788	0.236667	-0.0372957	-0.153963	0.230166	-0.176697
1650				11	-0.178656	0.354283	-0.271362	-0.440934	0.300883	-0.213596	-0.272728	-0.428271	0.267101	-0.328367	-0.534418	-0.617038	-0.268184	-0.168564	-0.218217	-0.513372	-0.389062	-0.769657	-0.0299718	-0.162047	-0.454564	-0.236364	-0.233	-0.284622	-0.162681	-0.236604	-0.136379	0.0116847	-0.165815	-0.357755	-0.0541932
1650				12	-0.193428	-0.281135	-0.33346	-0.591998	-0.150636	-0.0740573	-0.538073	-0.365162	0.0115705	-0.34473	-0.323804	-0.486205	-0.504193	-0.158604	-0.274	-0.16984	-0.553809	-0.138207	-0.418832	-0.0256184	-0.711407	-0.378704	-0.309589	-0.32263	-0.155181	-0.0993643	-0.388714	-0.0996747	-0.672411	-0.155979	-0.185158
1651				1	-0.2216	1.74309	-0.268246	-0.699692	0.676002	-0.00147771	-0.00222123	-0.657467	-0.145569	-0.272733	-0.518899	-0.185186	-0.444594	-0.137042	-0.20871	0.324901	-0.46684	-0.388938	-0.416316	-0.190428	-0.504416	-0.114015	-0.128007	-0.210894	-0.101866	0.0914279	-0.314254	-0.139068	-0.165408	0.0183626	-0.129651
1651				2	-0.0953885	-0.812242	-0.241388	0.127954	-0.438311	-0.229471	-0.518046	-0.467916	-0.39921	-0.16397	-0.527063	-0.321458	-0.457062	-0.144519	-0.205765	-0.180883	-0.509096	-0.250933	-0.225715	-0.826078	-0.375147	-0.1821	-0.227918	-0.258695	-0.0541695	-0.345125	-0.435388	-0.195685	-0.276572	-0.0623885	-0.157041
1651				3	-0.193277	-0.232472	-0.299786	-0.692267	-0.169175	-0.0266295	-0.388366	-0.259116	-0.634818	-0.175152	-0.465371	-0.362395	-0.323917	-0.172625	-0.2777	-0.067073	-0.438192	-0.0626933	-0.352709	-0.253345	-0.319867	-0.0926708	-0.265963	-0.323927	-0.11829	-0.417181	-0.209802	-0.0572226	-0.337673	-0.0685605	-0.0949705
1651				4	-0.11909	-0.147324	-0.286621	-0.0805477	-0.0484278	-0.321228	-0.331265	-0.0321449	-0.578985	-0.118386	-0.81988	-0.515906	-0.567039	-0.16661	-0.404789	-0.482985	-0.497175	0.874894	-0.256235	-0.188698	-0.299706	-0.255054	-0.270419	-0.389621	-0.105929	-0.0791482	-0.457173	-0.264463	-0.634059	-0.307121	-0.194084
1651				5	-0.188165	-0.875269	-0.268016	-0.278304	-0.364508	-0.191627	-0.201656	-0.188329	-0.364902	-0.100031	-1.00303	-0.527075	-0.609283	0.00328611	-0.382472	-0.51204	-0.477602	2.04954	-0.297181	-0.224108	-0.268321	-0.217736	-0.164353	-0.299652	-0.0492652	-0.0688316	-0.114682	-0.14805	-0.402094	-0.104419	-0.132217
1651				6	-0.0957638	-0.146586	-0.285569	-0.102691	-0.141885	-0.297232	-0.416567	-0.189889	-0.236032	-0.0987483	-0.809477	-0.522813	-0.504797	-0.132552	-0.176966	-0.52162	-0.309518	-1.20053	-0.43117	-0.449192	-0.257615	-0.155554	-0.211618	-0.209337	-0.101087	-0.155898	-0.0300518	-0.105724	-0.288051	-0.0577349	-0.156658
1651				7	-0.177755	-0.777416	-0.320926	-0.331829	-0.300754	0.00264505	-0.433099	-0.757727	-0.173435	-0.152142	-0.487605	-0.771431	-0.328736	-0.118711	0.081072	-0.688865	-0.340083	0.0693217	-0.224381	-0.312993	-0.422868	-0.150187	-0.257052	-0.425893	-0.113449	-0.118316	-0.128831	-0.0429564	-0.210166	0.0280173	-0.0803592
1651				8	-0.164243	-0.580439	-0.259752	-0.434305	-0.450479	0.0797236	-0.221543	-0.4985	-0.111641	-0.134868	-0.466624	-0.372128	-0.294506	-0.193611	-0.0427618	-0.0939345	-0.280527	0.971278	-0.240006	-0.106375	-0.558588	-0.139778	-0.214885	-0.343529	-0.132456	0.0184119	-0.104791	-0.0299269	-0.259093	0.0100382	-0.14225
1651				9	-0.181404	-0.483882	-0.263083	-0.277044	-0.267296	-0.193834	-0.275709	-0.410843	-0.157783	-0.0978183	-0.366988	-0.261987	-0.46257	-0.141488	-0.262235	-0.0928349	-0.306962	0.720624	-0.197735	-0.0575857	-0.530888	-0.196447	-0.214083	-0.174229	-0.192078	-0.143494	-0.082173	-0.0652515	-0.0174892	0.081904	-0.0847989
1651				10	-0.122647	-0.201514	-0.271306	-0.414904	-0.0463419	-0.15033	-0.267134	-0.416699	-0.105465	-0.293995	-0.373222	-0.266531	-0.432745	-0.148705	-0.311417	-0.172455	-0.327923	-0.116543	-0.402578	-0.174244	-0.576561	-0.185868	-0.19803	-0.307468	-0.0632486	0.00363518	-0.242076	-0.028314	-0.436958	0.0537553	-0.0848387
1651				11	-0.188772	0.7995	-0.265091	-0.734555	0.549067	-0.271083	-0.288821	-0.511592	0.438125	-0.327404	-0.552502	-0.497249	-0.289373	-0.103584	-0.228925	-0.542386	-0.29482	-0.167711	-0.167947	-0.48627	-0.2034	-0.246366	-0.285973	-0.338383	-0.149072	-0.127728	-0.242918	-0.0861127	-0.417625	-0.0270325	-0.0698984
1651				12	-0.342878	1.71857	-0.289831	-0.689455	1.04947	-0.101557	-0.534663	-0.316794	0.438233	-0.128002	-0.210383	-0.216902	-0.0707075	-0.090882	-0.235078	-0.150363	-0.404456	-0.143331	-0.126239	-0.229951	-0.325108	-0.339966	-0.180488	-0.352062	-0.264554	-0.147989	-0.164045	-0.120389	-0.626557	-0.0867514	-0.228045
1652				1	0.0587494	-2.43967	-0.208674	0.130041	-1.92929	-0.162631	0.343778	-0.494582	0.0877126	-0.266319	-0.247488	-0.218217	-0.280256	-0.150708	-0.321939	0.0207963	-0.327136	-0.661471	-0.246093	-0.218075	-0.31858	-0.188801	-0.11794	-0.286923	-0.116485	-0.206225	-0.224698	-0.127473	-0.428723	-0.348331	-0.153581
1652				2	0.00170123	2.71953	-0.181879	-0.0871405	1.53718	-0.0644341	-0.43853	-0.257178	-0.385813	-0.314122	-1.01055	-0.687209	-0.839315	-0.114799	-0.291816	-0.280585	-0.574955	-0.248339	-0.494144	-0.44562	-0.19129	-0.163654	-0.170958	-0.194674	-0.327451	-0.727592	-0.257398	-0.0947632	-0.617228	-0.396236	-0.226772
1652				3	-0.172828	0.753996	-0.4117	-0.495735	0.140128	-0.079485	-0.283956	-0.549909	-0.574645	-0.1766	-0.418702	-0.360373	-0.401978	-0.117173	-0.39173	-0.206009	-0.356769	-0.246866	0.000733693	-0.00766373	-0.193761	-0.240303	-0.278802	-0.234921	-0.0919286	-0.145967	-0.031743	-0.222817	-0.608088	-0.118869	-0.128666
1652				4	-0.254327	-0.434188	-0.186235	-0.245919	-0.159123	0.140104	-0.275955	-0.265599	-0.816835	-0.184201	-0.234387	-0.179062	-0.286374	-0.23014	-0.323875	-0.0898132	-0.52038	0.589449	-0.424715	-0.344406	-0.394854	-0.242204	-0.152024	-0.207671	0.0338703	-0.0881118	-0.481278	-0.245349	-0.335855	-0.220695	-0.166224
1652				5	-0.219981	-0.615808	-0.251499	-0.0708826	-0.283219	-0.0289595	-0.39068	-0.41509	-0.42954	-0.326481	-0.335943	-0.206704	-0.343141	-0.0975535	-0.571706	-0.191447	-0.412726	0.0214767	-0.283378	-0.0948296	-0.0993795	-0.130352	-0.105182	-0.114407	-0.144491	-0.181413	-0.0818681	-0.0986495	-0.551395	-0.0479957	-0.110107
1652				6	-0.141126	-0.591743	-0.338746	-0.1083	-0.187667	0.0239111	-0.569662	-0.550093	-0.331622	-0.200893	-0.439064	-0.0315378	-0.336887	-0.159757	-0.309563	-0.166156	-0.329984	0.119755	-0.247405	-0.228227	-0.304451	-0.277401	-0.185516	-0.440094	-0.258366	-0.343271	-0.187397	-0.114618	-0.268196	-0.175403	-0.100839
1652				7	-0.209232	-0.618796	-0.305806	-0.0610576	-0.275503	-0.059257	-0.445506	-0.422639	-0.467869	-0.331559	-0.331593	-0.382971	-0.314328	-0.290205	-0.262836	-0.366694	-0.394132	0.273471	-0.243473	-0.188851	-0.54266	-0.217468	-0.190703	-0.503173	-0.0697212	-0.0276477	-0.0305604	-0.112899	-0.265486	0.0360472	-0.141841
1652				8	-0.192525	-0.103121	-0.308205	-0.191923	-0.186792	-0.153684	-0.431437	-0.28781	-0.332147	-0.310945	-0.186757	-0.256936	-0.333983	-0.359232	-0.347365	-0.13947	-0.343581	0.637051	-0.208166	-0.256806	-0.736501	-0.191834	-0.18443	-0.389179	-0.0882843	-0.0713374	-0.158534	-0.0865274	-0.0825728	0.166164	-0.141602
1652				9	-0.225182	-0.504972	-0.222782	-0.260063	-0.231529	-0.0621475	-0.295137	-0.0909594	-0.217208	-0.238115	-0.501136	-0.351053	-0.489206	-0.224423	-0.252603	-0.475485	-0.468558	0.23161	0.0174529	-0.171145	-0.720879	-0.221734	-0.186262	-0.342078	-0.0348948	0.0173408	-0.0139299	-0.123115	-0.261805	0.022595	-0.193932
1652				10	-0.207688	0.420718	-0.261054	-0.321596	0.0889721	-0.3762	-0.147675	-0.303661	-0.430031	-0.293446	-0.0500519	-0.466191	-0.0416588	-0.100975	-0.107027	-0.599366	-0.276368	-0.174328	-0.0522365	-0.305156	-0.502359	-0.1396	-0.161182	-0.135111	-0.0269356	-0.0510676	-0.033906	-0.0611261	-0.282545	0.274447	-0.159574
1652				11	-0.278656	1.5245	-0.239122	-0.424283	0.720175	-0.209805	0.174192	-0.783962	-0.208785	-0.210198	-0.216409	-0.203743	-0.261771	-0.189697	-0.196763	-0.103861	-0.434748	0.098288	-0.209776	-0.272816	-0.57108	-0.122272	-0.0923218	-0.0354327	-0.161883	-0.354585	-0.0526353	-0.0786321	-0.201031	0.0887798	-0.0804517
1652				12	-0.106865	4.67166	-0.313364	-0.536314	3.78621	-0.118343	-2.758	-0.348913	-0.694015	-0.445229	-0.0751455	-0.261981	-0.0444986	-0.134043	-0.247541	-0.0966224	-0.19834	-0.894715	-0.0721827	-0.138607	-0.488827	-0.1919	-0.233253	-0.296493	-0.0981128	-0.0785332	-0.134367	-0.0715394	-0.36327	0.0109831	-0.14949
1653				1	0.0510857	1.42421	-0.151873	-0.829215	1.41348	-0.289508	-1.37681	-0.583046	-0.220299	-0.278165	-0.0208148	0.0470049	-0.0754752	-0.128875	-0.176538	0.0537687	-0.290401	-0.396236	-0.257278	0.144855	-0.257949	-0.0667075	-0.215718	-0.231103	-0.0290812	-0.00262725	-0.197213	0.0189864	-0.560355	0.0684572	-0.124095
1653				2	-0.0664235	-0.497945	-0.145945	-0.249632	-0.204514	0.0829763	-0.488006	-0.404012	-0.432566	-0.190507	-0.180427	-0.16683	-0.115542	-0.0911343	-0.209567	-0.234911	-0.346569	-0.330824	-0.351173	-0.0117585	-0.153782	-0.223144	-0.213479	-0.405395	-0.230035	-0.46413	-0.264385	-0.143464	-0.532979	0.00622648	-0.175619
1653				3	-0.179416	0.629439	-0.18964	0.185545	0.355252	0.0432775	-0.238093	-0.677601	-0.696525	-0.171734	-0.629731	-0.14735	-0.730394	-0.118786	-0.271522	0.131317	-0.669704	-0.472782	-0.091994	-0.300536	-0.282954	-0.247475	-0.126532	-0.349024	-0.145182	0.0135749	-0.304175	-0.104992	-0.553747	-0.0985268	-0.121975
1653				4	-0.24698	-0.537201	-0.185281	-0.468519	-0.422502	0.0353451	0.0286168	-0.229571	-0.593029	-0.108783	0.354226	-0.0295065	-0.0489669	-0.223686	-0.439512	0.00423535	-0.411493	-0.819684	-0.392154	-0.489227	-0.554476	-0.361444	-0.213483	-0.422766	-0.0834812	-0.142922	-0.430881	-0.284952	-0.492652	-0.21055	-0.20492
1653				5	-0.302346	0.751275	-0.228036	0.0766475	0.123923	-0.294743	-0.296831	-0.498847	-0.472117	-0.255283	-0.302085	-0.176917	-0.343097	-0.109116	-0.241536	-0.27327	-0.408623	-1.89961	-0.316618	-0.536047	-0.492219	-0.347373	-0.228864	-0.450651	-0.136601	-0.273863	-0.190028	-0.184413	-0.45318	-0.219369	-0.175716
1653				6	-0.150568	0.160139	-0.364899	-0.179954	-0.119188	-0.306372	-0.189939	-0.303213	-0.416614	-0.216493	-0.357367	-0.349804	-0.196378	-0.180791	-0.133637	-0.475586	-0.278814	-1.49856	-0.294679	-0.296583	-0.45019	-0.257044	-0.145406	-0.514996	-0.104043	-0.292512	-0.283109	-0.163545	-0.361928	-0.244985	-0.160777
1653				7	-0.168083	-0.255352	-0.364722	0.00232499	-0.132392	-0.128835	-0.371469	-0.354317	-0.528332	-0.265477	-0.552253	-0.509461	-0.386538	-0.136234	-0.278017	-0.60316	-0.33414	-0.180392	-0.341983	-0.328327	-0.557314	-0.286572	-0.141514	-0.549397	-0.231921	-0.329441	-0.239211	-0.103961	-0.306251	0.0518439	-0.162181
1653				8	-0.215221	-0.762934	-0.363012	-0.187327	-0.261688	0.00376056	-0.412213	-0.0500841	-0.446739	-0.20372	-0.131116	-0.249548	-0.144272	-0.318047	-0.370215	-0.0936599	-0.359648	-0.93642	-0.264091	-0.0512036	-0.606189	-0.154831	-0.174996	-0.435594	-0.0752934	0.0780337	-0.288791	-0.0120684	-0.198905	0.0274028	-0.0810246
1653				9	-0.189486	-0.304198	-0.299484	-0.10242	-0.11991	-0.103919	-0.267174	-0.0643316	-0.250785	-0.245598	-0.689307	-0.227407	-0.773584	-0.195168	-0.412862	-0.182681	-0.406529	-0.116067	-0.24808	-0.213652	-0.816458	-0.265407	-0.162088	-0.450949	-0.0389041	-0.147391	-0.508875	-0.0544025	-0.230614	-0.13688	-0.0879727
1653				10	-0.0805152	0.391999	-0.169805	-0.36924	0.186523	-0.100058	-0.20064	-0.204037	-0.119805	-0.248454	0.0313261	-0.296323	0.185224	-0.164524	-0.298681	-0.330783	-0.31625	-0.666414	0.00613982	-0.0788956	-0.583727	-0.150489	-0.0609679	-0.253202	-0.0278635	0.0867584	-0.234015	-0.0309156	-0.260589	-0.0890021	-0.105978
1653				11	-0.0274203	0.347087	-0.222445	-0.378649	0.0524284	-0.144806	0.0138373	-1.08676	-0.0727604	-0.372515	-0.102501	-0.0980144	-0.121231	-0.136265	-0.346336	-0.197089	-0.246007	-0.199308	-0.177236	-0.133627	-0.563182	-0.279909	-0.0823463	-0.271204	-0.0194768	-0.157468	-0.459957	-0.137562	-0.295885	-0.0882336	-0.0762842
1653				12	-0.288105	-0.424321	-0.346523	-0.589201	-0.505402	0.184736	0.449027	-0.769121	-0.221561	-0.474325	-0.602206	-0.368763	-0.530157	-0.153126	-0.396152	-0.159007	-0.411589	-0.116012	-0.461951	-0.365454	-0.244425	-0.264656	-0.227092	-0.410585	-0.0484931	0.0129327	-0.458233	-0.0822301	-0.721018	-0.0354055	-0.104313
1654				1	0.127631	0.213491	-0.102734	-0.245649	-0.126532	-0.196881	0.30814	-0.949572	-0.399758	-0.420316	-0.237431	-0.209179	-0.0621467	-0.110078	-0.335298	-0.0804343	-0.332894	-0.349383	-0.225732	0.330314	0.00722987	-0.148264	-0.200969	-0.340703	0.113047	0.0811225	-0.46297	-0.00966765	-0.588357	0.0951982	-0.181127
1654				2	-0.0531484	0.141439	-0.2013	-0.0833246	0.431126	-0.0604968	-0.789602	-0.736724	-0.620974	-0.216836	-0.399658	-0.238769	-0.246805	-0.127633	-0.271733	-0.00146337	-0.349362	-0.473844	-0.277332	-0.0473611	0.170421	-0.106352	-0.135934	-0.294839	-0.236033	-0.643373	-0.136747	0.0272746	-0.411187	-0.0792666	-0.134739
1654				3	-0.210296	0.139581	-0.257012	-0.152252	0.136838	0.239818	-0.419299	-0.446208	-0.390292	-0.155303	-0.225135	-0.166804	0.0146961	-0.128073	-0.423185	-0.0612522	-0.33457	-0.336638	-0.457123	-0.34861	-0.289008	-0.250359	-0.219493	-0.445084	-0.0679036	-0.0797459	-0.298249	-0.114048	-0.510935	-0.0673855	-0.0863913
1654				4	-0.24561	0.374664	-0.264858	0.208828	0.10016	0.0516536	-0.211318	-0.196062	-0.448412	-0.0666912	0.580517	0.120783	0.23261	-0.0568879	-0.399057	-0.117707	-0.254351	-0.49992	-0.277118	-0.415401	-0.538624	-0.23215	-0.104865	-0.405679	-0.0946945	-0.0839347	-0.478484	-0.107152	-0.247884	-0.0156626	-0.121862
1654				5	-0.170857	-0.200939	-0.372974	0.289251	-0.0773408	-0.0746992	-0.241177	-0.27175	-0.349288	-0.0146943	-0.176261	-0.250106	-0.208312	0.00572561	-0.367534	-0.470546	-0.261555	-0.290585	-0.309281	-0.437099	-0.358949	-0.264014	-0.17323	-0.289457	-0.219508	-0.474944	-0.0843801	-0.188037	-0.177486	-0.126006	-0.159582
1654				6	-0.241621	-0.495442	-0.326378	0.0150787	-0.1724	-0.363499	-0.325216	-0.741751	-0.529546	-0.0534583	-0.0796475	0.00540085	-0.187938	0.00261199	-0.505057	0.112572	-0.20654	-1.40033	-0.213201	-0.25291	-0.282584	-0.200734	-0.171541	-0.385454	-0.130672	-0.237969	0.0772079	-0.19026	-0.442693	-0.0066618	-0.200546
1654				7	-0.249075	-0.868523	-0.290969	0.0528855	-0.246224	0.0627103	-0.462112	-0.370942	-0.566612	-0.04781	-0.156464	-0.30848	-0.230326	-0.00931123	-0.247541	-0.182762	-0.161975	-0.621997	-0.217594	-0.279879	-0.0399301	-0.0544491	-0.130549	-0.211009	-0.0928917	-0.185908	0.303872	-0.0364295	-0.270942	0.231808	-0.041806
1654				8	-0.24599	-0.542509	-0.313282	-0.20171	-0.206682	-0.345834	-0.32691	-0.56317	-0.614448	-0.113336	0.00708885	-0.154183	-0.129208	-0.101111	-0.276021	-0.0705485	-0.214409	-0.276842	-0.148775	-0.132975	-0.251777	-0.162651	-0.0548201	-0.214285	-0.0600241	-0.063853	0.444161	-0.0785604	-0.139714	0.364136	-0.0439438
1654				9	-0.100357	-0.0136216	-0.295904	-0.35249	-0.0994	-0.169468	-0.314071	-0.312298	-0.321895	-0.253773	0.531829	-0.112522	0.193379	-0.0211	-0.178927	-0.0553917	-0.22907	-0.551179	-0.297093	-0.266671	-0.537543	-0.21869	-0.0752659	-0.27876	-0.0464076	-0.0820511	0.59085	-0.118003	-0.272403	0.33599	0.00600236
1654				10	-0.236168	0.203841	-0.297519	-0.584378	0.0217324	0.148019	-0.187569	-0.653968	-0.219666	-0.329699	0.292802	-0.00190811	0.0397067	-0.179567	-0.25283	-0.0630706	-0.257611	-0.169808	-0.448952	-0.650552	-1.03541	-0.339702	-0.198837	-0.350742	-0.0132952	-0.233731	0.242227	-0.10872	-0.272176	0.0664144	-0.0749777
1654				11	-0.123507	-0.212055	-0.219364	-0.0327189	-0.156481	-0.134498	0.0177398	-0.85187	-0.566623	-0.414175	-0.242893	0.0193273	-0.347842	-0.179957	-0.246145	0.244725	-0.448935	-0.142561	-0.467004	-0.325647	-0.550542	-0.269649	-0.148989	-0.327068	-0.0957736	-0.291201	0.0036773	-0.11354	-0.300236	0.0484318	-0.132917
1654				12	-0.108888	-1.08578	-0.243484	-0.090204	-0.696106	0.151956	0.0771324	-0.485483	-0.61905	-0.316311	-0.543808	-0.491064	-0.405666	-0.0980308	-0.28906	-0.344624	-0.294062	-0.310972	-0.3346	-0.203061	-0.321875	-0.197573	-0.163259	-0.23275	-0.0639407	-0.204104	-0.161182	-0.0680318	-0.373728	0.0653807	-0.212484
1655				1	-0.175347	-1.69352	-0.200577	-0.0855415	-1.48517	0.287408	0.182079	-0.560561	-0.235266	-0.274639	-0.351281	-0.226259	-0.289874	-0.132623	-0.230358	0.0502725	-0.245306	0.247604	-0.256326	0.534843	-0.305112	-0.268038	-0.130696	-0.247822	-0.0755976	-0.0594205	-0.361402	-0.171552	-0.3189	-0.0386156	-0.213058
1655				2	-0.115538	1.00339	-0.130486	-0.0295188	0.0443673	0.500705	0.488197	-0.807839	-0.318224	-0.0973102	-0.28171	-0.162258	-0.253755	-0.141042	-0.294862	-0.123587	-0.263228	0.398866	0.114481	0.076999	-0.438126	-0.175022	-0.0837983	-0.215966	-0.24397	-0.575371	-0.269634	-0.114327	-0.341809	-0.155454	-0.120256
1655				3	-0.188111	1.33259	-0.179539	-0.123555	0.716743	-0.200983	-0.0728632	-0.365111	-0.256946	-0.16442	-0.051565	-0.054533	-0.00523761	-0.126811	-0.316322	0.0511221	-0.333496	-0.0548431	0.0324453	-0.107398	-0.229036	-0.068766	-0.163172	-0.240811	-0.0284177	-0.341305	-0.18056	-0.157639	-0.502052	-0.212079	-0.0862654
1655				4	0.0587777	-0.937603	-0.146005	0.55383	-0.37794	0.212411	-0.336877	-0.293985	-0.424942	-0.258847	0.544951	-0.193192	0.0092597	-0.0838807	-0.284099	-0.355333	-0.432985	-1.03898	-0.157772	-0.0297856	-0.327101	-0.218366	-0.204791	-0.359931	-0.0699753	-0.252584	-0.433265	-0.242519	-0.423448	-0.325532	-0.0633813
1655				5	-0.168677	-0.646296	-0.23451	0.396279	-0.334922	-0.149632	-0.262547	-0.409444	-0.377353	-0.170424	-0.037968	-0.250983	-0.197118	-0.0177596	-0.577861	-0.440322	-0.426995	-0.413263	-0.46148	-0.444249	-0.431863	-0.208539	-0.162526	-0.50392	-0.107289	-0.312396	-0.316249	-0.173295	-0.340832	-0.191234	-0.150575
1655				6	-0.125457	-0.966051	-0.230063	0.607753	-0.330194	0.0837355	-0.161159	-0.120916	-0.255702	-0.198974	-0.830922	-0.438708	-0.41035	-0.0528213	-0.445918	-0.191628	-0.366435	0.922835	-0.271998	0.0237718	-0.374474	-0.293274	-0.14264	-0.520378	0.0316278	-0.0617279	-0.244791	-0.104587	-0.487937	-0.0532717	-0.159482
1655				7	-0.118639	-0.975767	-0.200904	0.483104	-0.335218	-0.0591416	-0.369765	-0.621801	-0.19062	-0.0149921	-0.35229	-0.61101	-0.317717	0.00500724	-0.500713	-0.391331	-0.184585	0.022359	-0.307119	-0.235876	-0.216188	-0.2087	-0.0917955	-0.371358	-0.0699501	-0.112262	0.226974	-0.13133	-0.334116	0.100819	-0.139346
1655				8	-0.0412228	-0.244799	-0.211981	0.0215353	-0.0982573	-0.087837	-0.103354	-0.10164	-0.237976	-0.0131987	0.0181915	-0.0456966	-0.0911488	0.0192832	-0.243424	-0.199222	-0.218895	-0.738454	-0.362631	-0.349855	-0.146692	-0.12427	-0.0961333	-0.196699	-0.100266	-0.164516	0.209598	-0.114405	-0.210727	0.250433	-0.136309
1655				9	-0.0509781	-0.569554	-0.22245	0.179909	-0.237281	0.242502	-0.101242	-0.285977	-0.0934405	-0.0968952	-0.032996	0.186179	-0.0848897	-0.116647	-0.144111	0.186748	-0.284122	0.228786	-0.271124	-0.136333	-0.172948	-0.0729401	-0.048151	-0.113394	-0.121145	-0.174697	0.084741	-0.00767625	-0.251435	0.0887914	-0.0493184
1655				10	-0.0343879	0.347051	-0.124111	-0.0398793	0.224323	-0.275318	-0.113015	-0.174079	-0.284546	-0.258116	0.154774	0.0811359	0.184276	-0.120983	-0.143675	0.0619981	-0.251347	0.00469732	-0.202761	-0.201467	-0.336885	-0.248464	-0.141006	-0.130522	-0.0574665	-0.0727026	-0.0526438	-0.151555	-0.251703	-0.126749	-0.132248
1655				11	0.125562	0.230749	-0.0608903	0.207941	0.327918	-0.352915	-0.693015	-0.276449	-0.396983	-0.303251	-0.0454806	0.0847666	-0.192907	-0.126291	-0.180343	0.0830586	-0.18796	-0.591238	-0.261818	-0.348345	-0.0316779	-0.239496	-0.153294	-0.219969	-0.0104913	0.0934538	0.0267333	-0.134775	-0.0722368	-0.0231853	-0.13303
1655				12	-0.0753305	1.40856	-0.23212	0.0240002	1.11959	-0.185977	-0.508597	-0.333921	-0.628715	-0.271063	-0.282784	-0.430893	-0.266797	-0.165816	-0.278449	-0.457892	-0.399903	-1.07276	-0.172694	-0.0277756	-0.191472	-0.239531	-0.0925289	-0.243107	-0.0857265	0.0979823	-0.215431	-0.0918718	-0.392681	0.144118	-0.182165
1656				1	0.0017807	-1.4393	-0.12008	0.511169	-0.507756	-0.0901117	-0.740137	-0.500808	-0.758383	-0.261863	-0.265319	-0.215646	-0.141984	-0.0749866	-0.280725	-0.111018	-0.254899	0.282296	-0.375041	0.199956	-0.179751	-0.138788	-0.137326	-0.227379	-0.0801085	-0.098791	-0.318311	-0.0598958	-0.714568	0.14909	-0.100951
1656				2	0.113806	-0.495659	-0.0780907	0.119057	-0.401006	-0.379533	-0.182577	-0.199021	-0.766594	-0.201678	-0.00836808	-0.119548	-0.0909202	-0.125995	-0.172232	-0.063188	-0.289197	-0.698764	-0.5914	0.0924991	-0.312396	-0.245556	-0.100985	-0.192077	-0.182936	-0.250591	-0.312971	-0.194251	-0.582549	0.100715	-0.250726
1656				3	-0.0997516	0.0160486	-0.181374	-0.0556306	-0.0491926	0.162778	0.0413012	-0.554181	-0.574662	-0.0722223	-0.0919044	-0.108975	0.16501	-0.0964189	-0.215524	-0.164324	-0.129759	-0.339051	-0.326235	-0.0550623	-0.323694	-0.0843166	-0.00188503	-0.228232	-0.105	-0.184856	-0.44052	-0.132004	-0.402456	-0.078576	0.00463696
1656				4	-0.277476	0.402067	-0.239298	0.133495	0.261995	0.0240599	0.0736341	-0.623084	-0.454952	-0.138659	0.261088	-0.0939666	0.0209241	-0.0742066	-0.0197559	-0.171546	-0.217707	0.0268602	-0.330402	-0.425129	-0.0630499	-0.109672	-0.0558159	-0.264409	-0.238594	-0.205229	-0.284009	-0.122651	-0.348357	-0.175958	-0.160624
1656				5	-0.170558	-0.736785	-0.2907	0.0729057	-0.170502	-0.0526047	-0.0954648	-0.20454	-0.203593	-0.147511	-0.448701	-0.387946	-0.41718	-0.0836661	-0.306859	-0.39096	-0.453213	-0.019065	-0.621151	-0.480913	-0.265702	-0.26224	-0.241925	-0.404564	-0.201657	-0.336274	-0.299804	-0.180988	-0.214113	0.0201768	-0.117353
1656				6	-0.0540177	-0.906794	-0.125027	0.00373144	-0.294869	-0.0701031	-0.160656	-0.342949	-0.42114	-0.115684	-0.569228	-0.165151	-0.34865	0.0124463	-0.180442	0.0199377	-0.274562	-0.0954902	-0.293972	-0.212233	-0.163758	-0.168927	-0.105638	-0.46909	-0.0875644	-0.0867838	-0.141653	-0.188598	-0.41338	-0.0703405	-0.172902
1656				7	-0.0801446	-0.39654	-0.195748	0.316705	-0.279528	0.0757156	-0.228339	-0.054345	-0.50025	-0.0222878	-0.184724	-0.203967	-0.208901	-0.0175128	-0.172718	-0.160981	-0.282777	0.596191	-0.257107	-0.109499	-0.331243	-0.200424	-0.0499463	-0.244607	-0.112117	0.151531	-0.0567846	-0.12326	-0.254537	-0.0135209	-0.120587
1656				8	-0.0584785	-0.548765	-0.185272	0.0575227	-0.290679	0.0102379	-0.122931	-0.285737	-0.417923	-0.136513	-0.264096	-0.109372	-0.334036	-0.0864678	-0.298797	-0.0724759	-0.242363	1.35362	-0.117998	-0.138734	-0.213539	-0.170565	-0.0589781	-0.268646	-0.112798	-0.0463888	0.122161	-0.148512	-0.0692042	-0.0751134	-0.136387
1656				9	-0.0742153	-0.0214846	-0.268805	0.114247	0.120898	-0.0492138	-0.0928915	-0.294252	-0.373931	-0.175867	-0.235623	-0.319213	-0.14023	-0.0606794	-0.303197	-0.246198	-0.197991	-0.00531616	-0.256471	-0.247907	-0.548562	-0.288606	-0.0547104	-0.205405	0.00303564	0.0154316	-0.0453516	-0.204684	-0.323615	-0.00738093	-0.205
1656				10	0.00847785	-0.274151	-0.230525	-0.0183072	-0.055295	0.0987427	-0.181674	-0.13667	-0.201573	-0.377675	0.448975	-0.0892275	0.272264	-0.200205	-0.252294	-0.135333	-0.222725	-0.754601	-0.368059	-0.121471	-0.524145	-0.363856	-0.0873542	-0.282839	0.0388165	0.0352342	-0.143748	-0.216071	-0.113103	-0.052648	-0.191961
1656				11	0.0570543	0.399834	-0.206688	-0.135319	0.405513	-0.0876794	-0.368893	0.0361454	-0.329919	-0.325558	-0.295906	-0.0921767	-0.527445	-0.187487	-0.28026	0.0327151	-0.372515	-0.720627	-0.373842	-0.0399289	-0.482096	-0.37722	-0.12543	-0.175341	-0.0348348	-0.132337	-0.149876	-0.196853	-0.452104	-0.225187	-0.0936773
1656				12	-0.0937307	1.19831	-0.238851	0.200606	1.00543	-0.193821	-0.489745	-0.34107	-0.296859	-0.41408	-0.364804	-0.171029	-0.317785	-0.146683	-0.381202	0.0235629	-0.278868	0.0506117	-0.454341	-0.179558	-0.140093	-0.282271	-0.27176	-0.256658	-0.00175737	-0.0704098	-0.24395	-0.195826	-0.386454	-0.207134	-0.240248
1657				1	0.306516	2.28222	0.00449689	0.344827	1.60161	-0.329231	-0.765032	-0.209016	-0.359238	-0.335534	-0.243691	-0.287169	-0.257941	-0.163161	-0.16143	-0.0975928	-0.311665	-1.6059	-0.418298	0.552918	-0.225608	-0.187876	-0.0328644	-0.240248	-0.182844	-0.242452	-0.0807737	-0.166272	-0.17022	-0.0441317	-0.163533
1657				2	0.0159033	3.22707	-0.115284	-0.13942	2.04539	-0.163278	-0.871367	0.0627246	-0.553103	-0.254773	-0.510918	-0.277557	-0.234421	-0.146856	-0.322837	0.0929161	-0.313721	-0.208026	-0.50546	-0.248644	-0.270602	-0.317241	-0.0283059	-0.254926	-0.226832	-0.347738	-0.172628	-0.353564	-0.517586	0.127839	-0.288063
1657				3	-0.0206577	1.14493	-0.20871	0.00934034	0.658659	-0.192575	-0.176935	-0.0121745	-0.662023	-0.243889	-0.0206855	-0.0943327	0.0505972	-0.166304	-0.214688	0.0195621	-0.184625	-0.130397	-0.142968	-0.0566034	-0.169166	-0.160427	-0.04876	-0.133707	-0.0751287	-0.0761449	-0.236562	-0.199553	-0.561838	-0.0579823	-0.184461
1657				4	-0.0856277	0.0400489	-0.18757	0.00947328	0.0236428	0.119871	-0.0433283	-0.172365	-0.710424	-0.119839	-0.137392	-0.0209778	-0.280489	-0.188586	-0.322832	0.13455	-0.344034	-0.965566	-0.45733	-0.3369	-0.0808092	-0.144155	-0.195394	-0.111831	-0.0529427	-0.218738	-0.20135	-0.194269	-0.49385	-0.168508	-0.14558
1657				5	0.00711168	-0.334297	-0.00853678	0.141342	-0.1082	-0.214519	0.010763	-0.300863	-0.45292	-0.125855	-0.182081	-0.147202	-0.257146	-0.0113642	-0.293737	-0.0548646	-0.293551	-0.0573197	-0.313338	-0.266278	0.133065	-0.142563	-0.0456685	-0.154583	-0.163658	-0.114463	-0.12268	-0.141958	-0.2827	-0.250075	-0.114822
1657				6	-0.0819337	-0.491257	-0.173237	-0.0922883	-0.1367	-0.133046	-0.19463	-0.241685	-0.472995	-0.114614	0.171258	0.0904686	-0.120599	-0.00733674	-0.246968	-0.0226963	-0.36798	-1.68331	-0.402701	-0.292621	-0.0555099	-0.119143	-0.121501	-0.308149	-0.271608	-0.0923771	-0.0511662	-0.168552	-0.31458	-0.212518	-0.146037
1657				7	-0.0565507	-0.427002	-0.134263	0.115719	-0.180314	0.0550227	-0.488193	-0.0194128	-0.829773	-0.0769943	0.166435	0.088699	-0.116274	-0.0818878	-0.218008	0.289014	-0.331964	-0.644317	-0.126648	-0.244849	-0.308376	-0.215977	-0.106755	-0.364249	-0.13347	-0.236909	0.0331088	-0.212462	-0.336608	-0.14912	-0.268578
1657				8	-0.142104	-0.400969	-0.120949	0.294398	-0.0373376	0.0500996	-0.28784	-0.278694	-0.642855	-0.0744036	0.137933	-0.0146564	-0.0282635	-0.0963498	-0.168122	-0.0913291	-0.278694	-0.813625	-0.141309	-0.303293	-0.383924	-0.165632	-0.0798159	-0.362705	-0.162399	-0.222415	-0.119868	-0.141755	-0.231613	-0.110356	-0.236353
1657				9	-0.017094	-0.648928	-0.0576459	0.265835	-0.349707	-0.264441	-0.241031	-0.504303	-0.235923	-0.148277	-0.370879	-0.282419	-0.258287	0.00335223	-0.212106	-0.260608	-0.190654	-0.95806	-0.436148	-0.267772	-0.324797	-0.182994	-0.0988712	-0.225983	-0.166031	-0.1151	-0.0542246	-0.152326	-0.0915535	0.181571	-0.0490742
1657				10	-0.0151218	0.0382233	-0.110708	0.0867534	0.122709	-0.132776	-0.194392	-0.130363	0.0305363	-0.256663	0.140159	-0.121335	0.239381	-0.152157	-0.262442	-0.0243543	-0.221455	-0.171478	-0.261879	-0.139611	-0.501602	-0.220521	-0.158611	-0.474205	0.052206	-0.0242874	-0.236775	-0.130237	-0.336895	0.124932	-0.154781
1657				11	-0.00845553	-0.560556	-0.135069	0.237958	-0.375501	0.0389874	0.206962	-0.423618	-0.222588	-0.397806	-0.0228585	-0.0708154	-0.315224	-0.177103	-0.281736	0.0410286	-0.479197	-0.60103	-0.184854	-0.0187717	-0.297709	-0.312326	-0.11331	-0.316587	-0.0833301	-0.0236869	-0.211554	-0.344177	-0.281236	0.118378	-0.098644
1657				12	0.0849592	-0.474875	-0.111093	0.387087	-0.337717	0.0362466	-0.123255	-0.487345	-0.691121	-0.310152	-0.202446	-0.161221	-0.211424	-0.130982	-0.216941	-0.232766	-0.269366	0.238341	-0.269549	-0.0465077	-0.204932	-0.244877	-0.131874	-0.216728	-0.0446422	0.0882396	-0.169695	-0.170949	-0.248406	-0.0559877	-0.187349
1658				1	0.186479	-6.55033	0.0834764	0.252361	-3.88689	0.306561	0.833181	-0.207126	-0.529774	-0.409511	-0.103938	-0.307652	-0.187191	-0.0198776	-0.229425	-0.230008	-0.384665	-0.660015	-0.154245	0.366427	-0.109302	-0.121124	0.0130226	-0.237013	-0.149372	-0.153828	-0.210481	-0.106424	-0.45514	-0.0492662	-0.0483754
1658				2	0.0388983	-4.02567	-0.0482063	0.478235	-2.53864	0.382734	0.562665	0.140639	-0.518773	-0.190047	-0.503527	-0.592416	-0.487993	-0.0500367	-0.162827	-0.37014	-0.299391	-0.320289	-0.134485	0.0904181	-0.203986	-0.105259	-0.0817384	-0.0900259	-0.206183	-0.257425	-0.140479	-0.0757737	-0.616683	-0.028823	-0.157131
1658				3	0.0704106	-0.151325	0.00828139	0.488811	0.0386451	-0.235816	-0.0326735	-0.543323	-0.623891	-0.333239	-0.257662	-0.0862632	-0.254076	-0.127337	-0.130719	0.341046	-0.478699	-0.57976	-0.362357	-0.109319	-0.173311	-0.137762	-0.226473	-0.131127	-0.14275	-0.120907	-0.131606	-0.170996	-0.582064	-0.0190076	-0.144562
1658				4	0.0649975	-0.34543	-0.0528351	0.577322	-0.184133	-0.20991	-0.206388	-0.148351	-0.778633	-0.178305	-0.186657	-0.135723	-0.155563	-0.096225	-0.233903	0.0307049	-0.395252	-1.05098	-0.25523	-0.294811	-0.148715	-0.153651	-0.163299	-0.234519	-0.120192	-0.00906932	-0.361075	-0.193996	-0.403371	-0.130369	-0.132252
1658				5	-0.0195607	-1.08529	-0.116746	0.135664	-0.199508	0.0626366	-0.163418	-0.18289	-0.422835	-0.0188466	-0.312589	-0.113886	-0.209237	-0.0844634	-0.191787	-0.0725329	-0.311581	-0.0969802	-0.310372	-0.339108	-0.299293	-0.177783	-0.11411	-0.211825	-0.191445	-0.155458	-0.0695505	-0.157896	-0.372469	-0.0860816	-0.175945
1658				6	-0.0264489	-0.49407	-0.027411	0.32148	-0.190171	0.118775	-0.184496	-0.143121	-0.366714	-0.158717	-0.147034	-0.0479162	-0.180227	-0.0151492	-0.237153	-0.17184	-0.323612	0.537795	-0.239611	-0.369721	-0.0200962	-0.0722146	-0.0960686	-0.128643	-0.203301	-0.168473	-0.0859581	-0.157661	-0.315579	-0.0970053	-0.162448
1658				7	-0.0232446	-0.990082	-0.0865794	0.272439	-0.276708	0.124327	-0.321786	-0.27978	-0.646671	-0.0211357	-0.0261409	-0.277218	-0.270964	-0.0231242	-0.128574	-0.375226	-0.24645	-0.245156	-0.239181	-0.283451	0.108366	-0.108	-0.0962663	-0.0813358	-0.199209	-0.224103	0.125157	-0.137704	-0.0691875	0.0635493	-0.116759
1658				8	-0.0027935	-0.76603	-0.129629	-0.0102688	-0.294597	-0.100004	-0.260323	-0.515456	-0.469972	-0.0511568	0.00944061	-0.193144	-0.156519	-0.116774	-0.216079	-0.160374	-0.282311	-0.0746187	-0.259806	-0.192007	0.0599292	-0.0839635	-0.0456153	-0.154869	-0.247893	-0.187447	0.0205869	-0.137787	-0.124616	0.0977763	-0.0424179
1658				9	0.0335918	-0.67964	-0.082819	0.491499	-0.282609	-0.0924496	-0.245045	-0.598559	-0.101249	-0.0999355	0.0453064	-0.133121	-0.15468	-0.0948057	-0.150582	-0.214325	-0.291692	0.256745	-0.22082	-0.300052	0.115861	-0.0127575	-0.065958	-0.151059	-0.10279	0.0685531	-0.0183435	-0.0164596	-0.227387	0.0120187	-0.0508919
1658				10	0.0357186	0.641185	-0.145788	-0.0294714	0.322892	-0.0867045	0.0418256	-0.139606	-0.0306744	-0.156417	-0.0995581	0.140479	-0.227189	-0.11562	-0.144932	0.154286	-0.38815	-0.261047	-0.0594024	-0.156633	-0.0201568	-0.0221757	-0.0613246	-0.198051	-0.235779	-0.30327	-0.219682	-0.094106	-0.151208	0.00317434	-0.114321
1658				11	0.0370099	0.730947	-0.0581017	-0.353591	0.0107948	-0.0515654	0.0650535	-0.0906575	-0.0950058	-0.278671	-0.0755242	0.00202864	-0.269377	-0.0895788	-0.241201	0.0133626	-0.36426	-0.325579	0.0465244	-0.180818	-0.111834	-0.167053	-0.119105	-0.141659	-0.209951	-0.110288	-0.278429	-0.163946	-0.462583	-0.0685345	-0.0934331
1658				12	0.0309908	3.12063	-0.0941657	0.330672	2.26027	-0.279559	-0.761117	-0.0381409	-0.187555	-0.229618	-0.131166	-0.00469505	-0.0886957	-0.102639	-0.247503	0.186095	-0.258921	-0.606721	-0.110837	-0.367756	-0.144456	-0.154284	-0.0558582	-0.251247	-0.157817	-0.265892	-0.332119	-0.10339	-0.240086	0.0624243	-0.0597744
1659				1	0.122369	0.715822	-0.0147483	-0.214736	-0.16048	0.155129	0.329228	-0.322968	-0.169736	-0.0799002	0.115699	0.242843	0.023644	-0.0463097	-0.253734	0.330241	-0.304887	0.32735	-0.304653	-0.0452825	-0.0398378	-0.176798	-0.150773	-0.191943	-0.383449	-0.272664	-0.323745	-0.194297	-0.244714	0.034144	-0.166929
1659				2	-0.00568784	-1.14171	0.0144711	-0.0884752	-0.914941	-0.0685477	0.439372	-0.767641	-0.236403	-0.105687	0.323929	0.31352	0.336268	-0.0784428	-0.0375583	0.348875	-0.182237	0.301927	-0.474788	-0.440193	-0.178414	-0.129202	-0.121421	-0.0630217	-0.484914	-0.66694	-0.551711	-0.164952	-0.0642306	0.0241784	-0.115406
1659				3	0.106549	0.760702	0.112909	0.433543	0.54823	-0.185271	-0.378651	-0.574741	-0.335179	-0.102643	0.148506	-8.08201e-05	0.251672	-0.0775094	-0.211398	-0.0230418	-0.035221	0.0232189	-0.340497	-0.454301	-0.109029	-0.000431379	-0.0360723	-0.0556071	-0.321554	-0.322511	-0.454764	-0.0317347	-0.351362	0.0103675	-0.179252
1659				4	-0.16126	0.150544	0.035744	0.253762	0.162716	0.00316139	-0.176018	-0.536376	-0.133194	-0.0417488	-0.697849	-0.265426	-0.473124	-0.111757	-0.105983	-0.196857	-0.319176	-0.516203	-0.0438896	-0.201522	-0.124831	0.043555	-0.104844	-0.0921371	-0.295575	-0.207839	-0.143544	-0.082004	-0.339698	-0.0563922	-0.139946
1659				5	-0.133073	-0.0389464	-0.129974	-0.0168603	0.00244935	-0.115762	-0.0278989	-0.287584	-0.030839	-0.0994378	-0.279976	0.0546729	-0.240178	-0.113522	-0.0238431	0.12702	-0.306708	-0.637632	-0.20755	-0.399929	-0.0883951	-0.0617451	-0.0536641	0.091112	-0.243937	-0.27358	-0.178159	-0.149988	-0.388399	0.215283	-0.20766
1659				6	-0.0774705	0.270172	-0.074452	0.114567	-0.0249315	-0.0499162	-0.0720805	-0.056596	-0.0403243	-0.0446654	0.228832	-0.201928	-0.130863	0.0515965	0.0512212	-0.256551	-0.319332	0.218319	-0.177259	-0.398103	0.0643097	-0.00048116	-0.154016	-0.063841	-0.250646	-0.297873	-0.198652	-0.0868223	-0.275316	-0.208398	-0.178449
1659				7	-0.10038	-1.4018	-0.0656139	-0.224291	-0.481675	-0.0279221	-0.208204	-0.20044	-0.262375	-0.0315842	0.227706	-0.307806	-0.176001	-0.110757	-0.140671	-0.235378	-0.108192	-0.095313	-0.179717	-0.301401	0.103295	0.0149517	-0.067513	-0.0310333	-0.275248	-0.0559347	-0.111478	-0.0923491	0.0835616	0.0152209	-0.0972049
1659				8	-0.0645649	-1.05692	-0.0640411	0.0419053	-0.471425	-0.00372197	-0.0630419	-0.0458771	-0.0618762	-0.0305307	-0.225694	-0.208331	-0.173535	-0.00489051	0.0512552	-0.228137	-0.20487	-0.624029	-0.233332	-0.287205	0.140341	0.00735467	-0.122655	0.0268614	-0.193918	-0.178517	-0.0281935	-0.081204	-0.192766	0.0416392	-0.0670074
1659				9	0.0974747	-0.596769	0.00334352	0.127881	-0.227925	-0.219092	-0.17577	-0.202651	0.0484586	-0.251055	-0.0954121	-0.19552	-0.111415	-0.0508832	-0.0209455	-0.237643	-0.240006	-0.246639	-0.10593	-0.20243	0.0248387	-0.0370209	-0.0915089	-0.109246	-0.258342	-0.110311	-0.198399	-0.169072	-0.00851135	0.244769	-0.166298
1659				10	0.0791966	0.459143	-0.0337557	0.0205898	0.263587	-0.0440171	-0.208445	0.246515	-0.126862	-0.307789	0.0844248	-0.122325	0.133825	-0.189884	-0.0390434	-0.127893	-0.270878	0.0838351	-0.0773925	-0.378424	0.184183	-0.0472382	-0.0929198	0.121346	-0.1522	-0.107731	-0.217498	-0.143161	-0.153566	0.120406	-0.146726
1659				11	-0.00252749	-0.156241	-0.14241	-0.128846	-0.0471571	-0.182345	-0.0649819	-0.32805	-0.32174	-0.391724	-0.258141	-0.217221	-0.205738	-0.124727	-0.206548	-0.110562	-0.265435	-0.38336	-0.239504	-0.214329	0.376285	-0.0796657	-0.111962	0.0256635	-0.329063	-0.389596	-0.0329934	-0.0655744	-0.158876	0.086615	-0.0300691
1659				12	0.00982113	-1.46756	0.0503503	0.427531	-0.538758	-0.224688	-0.26139	-0.296976	0.0845877	-0.323515	0.268122	0.294082	0.246457	-0.0981529	-0.0540403	0.265908	-0.275389	-0.232275	-0.313729	-0.530369	0.408065	0.138954	-0.0344749	0.0598508	-0.207823	-0.232297	0.0052798	-0.115681	-0.39595	-0.269348	-0.0492954
1660				1	0.0710937	-3.22103	0.00392278	0.858897	-1.58771	-0.0502515	-0.469427	-0.108153	-0.0729911	-0.074716	0.159757	-0.192854	0.416499	-0.0735294	-0.0479753	-0.558495	0.0731633	-0.491485	-0.334836	-0.0473301	0.0731249	-0.219965	-0.0822685	0.0586981	-0.419712	-0.31335	0.258147	-0.35542	-0.13967	-0.0292257	-0.171289
1660				2	0.165846	-1.30833	0.144747	0.705716	-0.472669	-0.335812	-0.389401	-0.314378	-0.0560727	0.000542514	0.5235	0.0368803	0.508111	-0.0568516	0.097709	-0.435022	0.00495625	-0.471381	-0.00649611	-0.934153	-0.0717893	-0.0769365	0.000964228	0.21285	-0.492373	-0.740282	0.0581137	-0.241658	0.243923	0.0557813	-0.0379826
1660				3	0.0199555	1.34724	0.0430333	0.207867	0.63479	-0.158513	0.346508	-0.131527	-0.326594	-0.141101	0.0380094	0.224034	-0.445692	-0.0799032	0.187478	0.422508	-0.383245	-0.245503	-0.0154711	-0.287787	-0.0422871	0.0055062	-0.0111223	0.130075	-0.247416	-0.405443	-0.0876817	-0.154282	-0.336363	-0.0349396	-0.169823
1660				4	-0.113567	1.19614	0.043465	0.452969	0.372537	0.0621869	0.0240096	-0.0770134	-0.238437	-0.0482796	-0.241067	-0.148581	-0.427566	-0.101459	0.189747	0.0350769	-0.444164	0.316663	-0.283521	-0.396389	-0.153208	-0.0785229	-0.178695	-0.0706413	-0.33137	-0.368894	-0.18794	-0.189208	-0.5165	-0.0380854	-0.181671
1660				5	0.01954	-0.218218	-0.0124564	0.0259778	-0.0897376	-0.0892015	0.0358847	-0.0288745	-0.240117	-0.0034104	-0.0658725	-0.196582	-0.20198	-0.189888	0.0305812	-0.135582	-0.265885	0.342895	-0.368513	-0.567354	-0.126941	-0.0446381	-0.0621557	0.0782794	-0.279691	-0.223891	-0.0787172	-0.0542674	-0.230528	0.138245	-0.0655303
1660				6	0.019337	-1.1965	-0.00767377	0.0679824	-0.398427	-0.0161571	-0.141588	-0.327346	-0.357761	-0.166076	-0.694361	-0.532466	-0.44598	-0.10517	-0.0361792	-0.608399	-0.204145	0.647809	-0.424229	-0.395957	-0.00721397	-0.0117059	-0.137609	0.0601157	-0.39178	-0.385843	-0.0998913	-0.0861184	0.0140532	0.100525	-0.10168
1660				7	-0.00490735	-1.81154	-0.0312721	0.0656504	-0.614303	0.124961	-0.374948	-0.244856	-0.343746	-0.135678	-0.394019	-0.630751	-0.314141	-0.146289	-0.0399607	-0.577173	-0.225873	-0.264798	-0.120772	-0.0197671	-0.115083	-0.0226231	-0.117886	0.104629	-0.224434	-0.171802	0.0535632	-0.0405188	0.000224749	0.203919	-0.076163
1660				8	-0.0474541	0.186271	0.00717742	0.429856	0.0372617	-0.194576	-0.178152	0.0751817	-0.100994	-0.0908125	-0.140263	-0.284951	-0.375189	-0.162642	-0.0776358	-0.315577	-0.315241	-0.00579205	-0.247178	-0.249757	0.123101	-0.0451222	-0.146411	0.0499441	-0.274203	-0.274834	-0.0645667	-0.110785	-0.0668925	0.0665282	-0.0688728
1660				9	0.0517689	0.762123	-0.0257073	0.344601	0.594983	0.101573	-0.0397566	0.0308017	-0.0899729	-0.110228	-0.281083	-0.282409	-0.223453	-0.0813188	-0.0712232	-0.336801	-0.29135	0.0281225	0.105461	-0.0165863	0.250076	-0.0385258	-0.100704	0.0811818	-0.195275	0.0118353	-0.00572834	-0.148914	0.0319111	0.137173	-0.159658
1660				10	-0.0719322	0.231286	-0.0368761	0.314623	0.242569	0.000949097	-0.235032	-0.144954	0.136928	-0.358092	-0.597481	-0.529294	-0.476975	-0.0906963	-0.189394	-0.490819	-0.224976	-0.174055	-0.282488	-0.195231	0.141197	-0.103589	-0.0686183	-0.0945682	-0.201423	-0.36048	-0.0963564	-0.156476	-0.267107	0.035111	-0.0678538
1660				11	0.103309	0.426295	-0.092783	0.146028	0.489694	-0.0530104	-0.371037	-0.244928	0.134061	-0.417696	-0.174909	0.0670142	-0.0958503	-0.062668	-0.205097	-0.0735048	-0.231639	-0.180703	-0.136644	-0.250245	0.345266	-0.203569	-0.0971455	-0.0141905	-0.118065	-0.20849	-0.128311	-0.231733	-0.296169	-0.0235611	-0.113329
1660				12	-0.0348623	1.08885	-0.017065	0.0899322	0.39486	-0.0479064	1.12668	-0.0911004	-0.276897	-0.264063	-0.264651	-0.286726	-0.266385	-0.121024	-0.136314	0.00855544	-0.174813	-0.736611	-0.0719481	-0.0573815	0.130842	-0.042698	-0.0789562	0.156204	-0.305264	-0.174704	-0.0189798	-0.155922	-0.0567933	0.272765	-0.0625439
1661				1	0.134328	1.64163	0.0359739	-0.046364	0.600273	-0.147556	0.673597	-0.387676	-0.485932	-0.118711	-0.0859237	-0.333799	0.0905557	0.00646095	-0.0680655	-0.33866	-0.0499055	-0.301834	-0.0769743	0.151072	0.0763102	0.0299417	-0.0671623	0.0780119	-0.272253	-0.328165	-0.102405	-0.0824979	-0.110978	-0.0134825	-0.0420487
1661				2	0.149319	1.80967	-0.0553322	-0.415123	0.785077	0.0237355	0.849119	-0.432698	-0.732403	-0.168071	-0.172584	-0.236901	-0.211907	-0.0483029	-0.0197723	-0.197581	-0.221211	-0.118626	-0.203272	-0.108937	-0.00993017	-0.102762	-0.158603	0.0727987	-0.35196	-0.681017	-0.128488	-0.134804	-0.216775	-0.189677	-0.115862
1661				3	-0.00806154	1.41284	0.0878235	0.179535	0.496321	-0.201591	0.700516	-0.160276	-0.685569	-0.00404034	0.886618	-0.300548	1.06964	-0.0405221	0.117364	-0.558916	0.227604	0.190138	-0.0488764	-0.250445	-0.206046	-0.0854629	-0.205474	-0.00762393	-0.172474	-0.412637	0.106456	-0.153822	-0.175299	-0.0708474	-0.109543
1661				4	0.063218	0.34491	0.0944045	0.842043	0.210568	0.306906	-0.00201804	-0.461809	-0.367042	-0.0848282	-0.371534	-0.251244	-0.362248	-0.0658543	0.0809312	-0.115203	-0.310129	1.33165	-0.187824	-0.306231	-0.147908	-0.0738824	-0.00713272	0.0440647	-0.313542	-0.124745	0.0501471	-0.0684008	-0.32908	-0.103322	-0.106299
1661				5	0.0920822	-0.634075	0.0147291	0.497041	-0.342766	0.0737257	-0.019024	-0.273603	-0.0921755	-0.0386182	0.143975	-0.167686	-0.153606	-0.0880377	0.0956637	-0.230903	-0.15033	1.41002	-0.188625	-0.442265	-0.24385	-0.112545	-0.0783243	0.0697669	-0.406805	-0.311316	0.0295058	-0.158044	-0.171118	0.0340203	-0.096149
1661				6	-0.00131194	-0.841445	-0.107502	0.198044	-0.350977	0.0437718	0.0160046	-0.424831	-0.0644142	-0.0734225	0.447063	0.133651	-0.0698792	-0.0926257	-0.121808	-0.070217	-0.157346	0.897903	-0.196557	-0.298513	-0.190886	-0.0232148	-0.0855172	0.172855	-0.27485	-0.320722	-0.148685	-0.121406	-0.155044	0.0222822	-0.218152
1661				7	0.044863	-1.08394	-0.0644828	-0.0111399	-0.515175	0.10917	-0.167409	-0.33423	-0.286133	-0.104151	0.322812	0.0524937	-0.0841506	-0.111324	-0.0171984	0.195554	-0.251697	0.1337	-0.129597	-0.120896	-0.17036	-0.0703239	-0.132496	0.0131543	-0.190428	-0.213462	-0.0506944	-0.112481	-0.162991	-0.0405137	-0.162715
1661				8	-0.0148327	-1.15582	-0.0446205	0.12965	-0.454004	-0.0116213	-0.222819	0.133223	-0.214014	-0.0909479	0.0800964	-0.216713	-0.180447	-0.0776578	-0.219472	-0.159193	-0.200365	0.850226	-0.294494	-0.0176562	-0.260559	-0.0759831	-0.115363	0.0165407	-0.299784	-0.17925	-0.0636397	-0.0646502	0.0974752	0.00712763	-0.028603
1661				9	0.00208817	-0.20941	-0.0101262	-0.167328	-0.281579	0.0557343	-0.103454	0.0350439	-0.0753283	-0.156277	-0.609351	-0.387926	-0.622554	-0.0385713	-0.182799	-0.271677	-0.300136	0.140564	-0.0511677	-0.080945	-0.541423	-0.121219	-0.0712223	-0.169976	0.00437174	0.107845	-0.289918	-0.0694095	0.0200665	0.023993	-0.0510274
1661				10	-0.0706294	0.672503	-0.092935	-0.20802	0.258432	0.0524103	0.175292	-0.147035	-0.00600471	-0.278832	-0.27362	-0.206085	-0.268431	-0.16345	-0.151815	-0.14741	-0.259457	-0.226335	0.00467498	-0.0749035	-0.550348	-0.237555	-0.113523	-0.107	-0.0956316	-0.00803016	-0.109496	-0.13767	-0.292232	0.129725	-0.165336
1661				11	-0.00848414	2.07612	-0.06176	0.158798	1.38378	-0.0465855	-0.0925527	-0.901826	-0.0466068	-0.3048	0.0409604	-0.220158	-0.113392	-0.106402	-0.138051	-0.335605	-0.372403	-0.270721	-0.229824	-0.0533185	-0.283925	-0.190319	-0.0498394	-0.140257	-0.148835	-0.0816398	-0.229231	-0.239536	-0.223137	-0.212167	-0.131572
1661				12	-0.0175245	2.35628	-0.0373401	-0.392869	1.36782	-0.0920877	-0.160852	-0.44368	-0.0631384	-0.22967	0.0297041	0.140055	0.149278	-0.065501	-0.0964426	0.0555935	-0.246819	0.62769	-0.386792	-0.422061	-0.236853	-0.097273	-0.129657	-0.167515	-0.18155	-0.304741	-0.186205	-0.0927034	-0.184487	-0.021789	-0.15173
1662				1	0.121492	2.23695	0.0283712	-0.659761	1.00284	-0.089401	1.08784	-0.766914	-0.321046	-0.0541071	0.0966262	0.0902814	0.215398	-0.0565006	-0.149299	0.0199857	-0.0811393	-0.438337	-0.14616	0.686743	-0.0368928	-0.145407	-0.150029	-0.173995	-0.241428	-0.304721	-0.276698	-0.144197	-0.171334	-0.024589	-0.201898
1662				2	0.0428733	2.9935	-0.0277004	-0.317482	1.78609	-0.158294	0.185877	0.12763	-0.36278	-0.223952	-0.255795	-0.00687476	-0.208433	-0.050319	-0.0717113	0.360222	-0.25261	0.167779	-0.22632	0.370268	0.0375876	-0.0298727	-0.0845994	-0.256787	-0.39901	-0.491917	-0.0619081	-0.134156	-0.173949	0.0477304	-0.058128
1662				3	-0.146052	1.44099	-0.069815	-0.17676	0.495333	0.0363206	0.59175	-0.399385	-0.232873	-0.0574327	-0.240429	-0.223686	-0.318508	-0.0389505	-0.205291	-0.0387264	-0.355181	-0.108778	-0.320374	-0.272823	-0.169706	-0.0675624	-0.0333048	-0.21142	-0.268604	-0.240412	-0.163205	-0.0494635	-0.373829	-7.71205e-05	-0.0778196
1662				4	-0.0686542	0.0516093	-0.0670792	0.0720708	-0.195552	0.0817729	0.248138	-0.331584	0.358767	-0.0334557	-0.780841	-0.33465	-0.377672	-0.0271981	-0.0724273	-0.323147	-0.198078	-1.70895	-0.167602	-0.198257	-0.0425764	-0.077081	-0.0860149	-0.14222	-0.311318	-0.31821	0.106421	-0.0624517	-0.235747	0.0752569	-0.0952206
1662				5	-0.0304879	-0.80768	-0.100152	0.184154	-0.19297	-0.147976	-0.171934	-0.249623	-0.036727	-0.140192	-0.0657018	0.0738894	-0.151798	-0.0785868	-0.0283464	0.0559209	-0.223305	-1.59973	-0.166199	-0.173378	0.183318	-0.0926327	-0.0948743	-0.260786	-0.130093	-0.146072	-0.240958	-0.0535292	-0.193132	0.214175	-0.105789
1662				6	-0.130644	-0.359464	-0.0643525	0.0664198	-0.218447	0.147849	-0.255199	-0.186816	-0.0327483	-0.181924	-0.101197	-0.00372105	-0.0638195	-0.0399486	-0.0549628	0.122243	-0.222383	0.738182	-0.346274	-0.254391	0.0466	-0.164452	-0.103364	-0.29994	-0.227789	-0.120139	-0.242832	-0.162363	-0.316864	-0.131421	-0.110357
1662				7	-0.0298517	-1.63951	-0.176215	-0.0300112	-0.622122	0.0479284	-0.122302	-0.125111	-0.0924187	-0.0961117	0.425334	0.524364	0.0252511	-0.101245	0.0858671	0.650121	-0.212329	0.535295	-0.164853	-0.0148471	-0.0380857	-0.203911	-0.0842061	-0.188582	-0.172064	-0.106209	-0.12671	-0.150203	-0.0525697	-0.194086	-0.0987842
1662				8	0.0151299	-1.21841	-0.133655	-0.0708104	-0.544856	-0.105639	-0.218893	-0.0862549	0.168762	-0.153314	-0.248772	-0.0190662	-0.260737	-0.108885	-0.148936	-0.126854	-0.243963	1.12218	-0.232054	-0.203408	-0.0222508	-0.125383	-0.0885096	-0.144035	-0.195922	-0.212789	-0.123534	-0.135268	-0.047778	-0.0691205	-0.117997
1662				9	-0.0193352	-0.127859	-0.162232	0.107219	-0.0589499	0.0822664	-0.0234755	-0.0799835	0.0212636	-0.0636482	0.176412	-0.0430578	-0.028169	0.0535918	0.00689036	-0.0923533	-0.22351	0.198755	-0.151675	-0.287451	-0.154984	-0.0655491	-0.141691	-0.217328	-0.109033	-0.120681	-0.222165	-0.0509654	-0.193696	-0.0692229	-0.00867659
1662				10	0.0468442	0.970843	0.000225639	0.284732	0.580442	-0.10801	-0.158181	-0.405338	0.0956913	-0.198216	-0.182523	-0.119136	-0.327792	-0.111504	-0.0452175	-0.0516809	-0.199227	-0.118886	-0.147263	-0.0381241	-0.409779	-0.0188016	-0.030147	-0.261005	-0.18968	0.0352256	-0.0122614	0.0527522	0.0627426	0.205687	-0.0207843
1662				11	-0.0340083	0.787924	0.0293044	0.152978	0.57953	-0.146209	-0.341465	-0.897433	0.363349	-0.115294	-0.182575	-0.0264855	-0.0806545	0.0348413	-0.0463232	0.093198	-0.03954	-0.177255	-0.308811	-0.142966	-0.0815742	-0.0578189	-0.0347389	-0.109505	-0.350897	-0.346785	0.128002	0.0345977	0.378479	0.208916	-0.146473
1662				12	0.0235426	0.194969	0.0079003	0.185523	0.272486	-0.195052	-0.619777	-0.342637	-0.295625	-0.0536137	-0.478793	-0.39464	-0.28194	0.0401204	-0.0610117	-0.345173	-0.0775612	-0.471524	-0.0719424	0.000632413	0.0234311	-0.0559427	-0.0606284	-0.0977954	-0.244588	-0.331327	0.154902	-0.0302511	0.143238	0.081616	-0.0626926
1663				1	0.10856	-2.03778	0.0514081	0.677849	-1.19548	-0.252356	-0.299876	-0.315696	-0.177064	-0.0613245	0.414633	0.208819	0.405643	-0.0552036	-0.070833	0.124445	-0.0511701	-0.477064	-0.0671705	-0.156691	0.023511	-0.116289	-0.106892	-0.0606924	-0.262066	-0.142432	0.0441729	-0.176645	0.247007	-0.117088	-0.165035
1663				2	0.152952	-2.37539	-0.0212803	0.21833	-1.61536	-0.172862	0.441576	-0.389861	-0.226666	-0.101178	0.204584	-0.053893	0.065377	-0.0689194	0.015609	-0.192677	-0.0946035	0.120773	-0.0994107	0.159607	-0.241292	-0.146812	-0.0654916	-0.0377913	-0.290799	-0.536135	-0.0451883	-0.152997	0.154493	-0.189141	-0.0509659
1663				3	-0.0288669	0.963177	-0.100054	0.196726	0.468345	0.0313167	0.166869	-0.65165	-0.165477	-0.1192	0.418363	-7.53663e-05	0.112039	-0.0355668	-0.109204	-0.101646	-0.357225	-0.0809476	-0.0786578	-0.207586	-0.132644	-0.0654434	-0.131337	-0.23795	-0.0527784	-0.130205	-0.252059	-0.153908	-0.0313894	-0.130948	0.00224133
1663				4	-0.0649864	-0.791577	-0.0759637	0.147731	-0.365008	0.092091	-0.019023	-0.404447	-0.0355106	-0.0970314	-0.589049	-0.434679	-0.493036	-0.10797	-0.16403	-0.250666	-0.397947	-1.04545	-0.0396095	-0.11236	-0.173682	-0.0895703	-0.118734	-0.292596	-0.188172	-0.168703	-0.21062	-0.137628	-0.185517	-0.0326495	-0.0363541
1663				5	-0.103345	-0.661789	-0.244857	0.413724	-0.216911	-0.00084188	-0.258757	-0.196557	-0.160132	-0.0755044	-0.300764	-0.158488	-0.304542	-0.0805342	0.0417926	-0.171352	-0.327883	-0.99185	-0.298483	-0.349473	-0.0787534	-0.0712475	-0.0941114	-0.143763	-0.148798	-0.0986225	-0.13902	-0.103879	0.0961571	-0.0136291	-0.145456
1663				6	0.00470002	-1.14708	-0.0498529	0.0641	-0.32338	-0.0664939	-0.189278	-0.514842	-0.350873	-0.20346	-0.181164	-0.00994282	-0.166118	-0.175679	-0.134692	-0.0811747	-0.293794	-0.127088	-0.174767	-0.257147	-0.129149	-0.040093	-0.113721	-0.281836	-0.0748567	0.081535	-0.152742	-0.0836027	-0.166206	-0.131765	-0.120414
1663				7	-0.0871103	-1.38204	-0.163768	0.0766205	-0.32843	-0.0921626	-0.406902	-0.177993	-0.332686	-0.140406	0.282291	-0.301142	-0.0588878	-0.191288	-0.0313014	-0.267656	-0.235885	-0.0847138	-0.329852	-0.205664	-0.418613	-0.0838947	-0.0973878	-0.293315	-0.164846	-0.0116346	-0.172587	-0.116645	-0.223787	-0.104408	-0.0817687
1663				8	-0.149675	-0.900839	-0.189325	-0.137946	-0.317491	-0.00748994	-0.32997	-0.114607	-0.252125	-0.0758532	-0.0696171	-0.0953468	-0.161417	-0.183186	-0.0892763	-0.189552	-0.260844	-0.274722	-0.267749	-0.260975	-0.207618	-0.0233479	-0.0823012	-0.306469	0.0123913	0.0321768	-0.0273867	-0.036511	-0.161767	-0.0301324	0.00275383
1663				9	-0.0278648	-0.0830348	-0.073063	0.0669501	-0.12958	0.00994263	-0.1798	-0.194537	-0.0656237	-0.160587	-0.498631	-0.102024	-0.216253	-0.187909	-0.146035	-0.0299267	-0.319676	0.286217	-0.472564	-0.205323	-0.418929	-0.121316	-0.0780354	-0.187663	-0.263593	-0.263276	-0.150029	-0.0941917	-0.36921	-0.0752787	-0.0825978
1663				10	-0.0192626	0.35838	-0.0784544	0.175692	0.289183	0.0326855	-0.0375144	-0.293004	-0.102646	-0.16635	-0.389381	-0.12465	-0.331505	-0.0634995	-0.204206	-0.121753	-0.208611	-0.0598865	-0.184614	0.0309753	-0.494598	-0.148541	-0.131847	-0.238083	-0.142529	-0.0477002	-0.0343943	0.0128295	-0.117605	-0.0423941	-0.063671
1663				11	0.0175226	1.30835	-0.13188	-0.00725575	0.964338	-0.0779826	-0.446396	-0.378971	0.232246	-0.412747	0.000775433	-0.00434834	-0.0462764	-0.0813505	-0.0898775	-0.138819	-0.198178	-0.211145	-0.307352	-0.155126	-0.553532	-0.260532	-0.140482	-0.292223	-0.171732	-0.131961	-0.15991	-0.168432	-0.133697	-0.203039	-0.115299
1663				12	-0.154978	1.2419	-0.174139	-0.0948481	0.925632	0.160693	-0.487226	-0.353478	0.0399633	-0.168305	-0.129956	0.0352793	-0.126003	-0.0351112	-0.204082	0.165723	-0.2778	-0.318912	-0.412337	-0.243633	-0.245066	-0.0556947	-0.0628696	-0.16955	-0.174123	-0.0859442	-0.158981	-0.0113683	-0.186636	-0.0762953	-0.0755901
1664				1	0.0116169	0.732347	-0.151698	0.127989	0.443354	0.0708282	-0.6468	-0.682881	-0.243306	-0.0558008	-0.461125	-0.555226	-0.183769	-0.00307579	-0.241237	-0.56362	-0.114016	-0.167033	-0.156896	-0.287083	-0.181809	-0.0826186	-0.0542439	-0.134896	-0.00428187	-0.161713	-0.078771	-0.0547707	-0.420102	-0.0736784	-0.0857003
1664				2	-0.0879346	1.33018	-0.232512	-0.118737	0.518913	0.0832562	0.151836	-0.629146	-0.0867105	-0.196778	-0.537362	-0.451307	-0.353396	-0.0308049	-0.324465	-0.409902	-0.293024	-0.30461	-0.0409104	-0.427118	-0.224772	-0.132185	-0.0292177	-0.0277872	-0.163897	-0.627256	-0.266868	-0.0794701	-0.414153	-0.0615092	-0.181066
1664				3	0.0603779	0.539098	-0.147503	-0.401704	0.0974615	0.0574388	0.302832	-0.417485	-0.391318	-0.148799	0.230543	0.20143	0.105123	-0.0728536	-0.333717	0.195097	-0.349579	0.0211042	-0.133906	-0.289971	-0.142165	-0.161387	-0.217797	-0.360342	0.0158786	-0.146221	-0.326974	-0.0994589	-0.440996	-0.285416	-0.0780313
1664				4	-0.112373	0.248509	-0.119821	0.0206623	0.14272	-0.00929288	-0.113669	-0.304081	-0.391462	-0.0418098	-0.0132192	0.107215	-0.0773721	-0.127853	-0.309707	0.145028	-0.16443	-0.981442	-0.297927	-0.100958	-0.39148	-0.247899	-0.0865852	-0.314555	-0.0646595	-0.0788563	-0.25106	-0.177596	-0.468947	-0.143411	-0.120951
1664				5	-0.171605	-0.42342	-0.127361	0.030298	-0.126319	0.118013	-0.0845414	0.240257	-0.340028	-0.0566693	0.111744	0.135	-0.122812	0.0197999	-0.25044	-0.0118701	-0.358853	-0.655255	-0.256844	-0.200554	-0.260655	-0.208085	-0.0215082	-0.10644	-0.0829089	-0.165575	-0.238391	-0.121036	-0.319187	-0.185407	-0.149671
1664				6	-0.127004	0.0436115	-0.157944	0.117471	-0.185796	-0.12561	0.00449568	-0.0681026	-0.422296	-0.057788	0.00295595	-0.0949495	-0.26749	0.043784	-0.534011	-0.180564	-0.271762	-0.542551	-0.228262	-0.0629096	-0.18231	-0.19516	-0.199237	-0.318165	-0.0441884	-0.161468	0.0133442	-0.109417	-0.253946	-0.103277	-0.202114
1664				7	-0.0671747	-0.743752	-0.220582	-0.0139189	-0.412864	0.126202	-0.248733	-0.0959934	-0.563454	0.00723991	0.140582	0.00516663	-0.0913966	0.0831704	-0.328403	0.0403106	-0.227266	0.603572	-0.266218	-0.0849937	-0.259535	-0.140699	-0.0310674	-0.321437	-0.0117579	-0.0229328	0.158732	-0.150334	-0.0995973	0.0241892	-0.0987251
1664				8	-0.125508	-0.642592	-0.246736	0.228497	-0.276293	0.0897839	-0.221867	0.21923	-0.352581	-0.0241201	0.00694199	-0.210366	-0.0941471	-0.0551968	-0.231313	-0.273437	-0.178938	-0.0690493	-0.382914	-0.146686	-0.306055	-0.131916	-0.0603209	-0.21912	-0.00371532	0.126912	0.258157	-0.0720545	-0.0325602	0.249761	-0.0677322
1664				9	-0.154814	-0.325022	-0.151102	-0.147928	-0.316679	0.0793653	-0.177213	0.0909812	-0.0797114	-0.137224	0.214441	-0.0600142	-0.200189	-0.0409021	-0.194848	-0.292075	-0.238822	1.0801	-0.0743849	-0.0210104	-0.274617	-0.0864899	-0.0385666	-0.166224	-0.0898274	0.146222	0.104352	0.0482129	0.111285	0.215912	0.0155811
1664				10	0.0701482	-0.409645	-0.114646	0.00253822	-0.309719	-0.00573902	-0.180268	-0.146298	-0.231472	-0.338168	0.439894	-0.0120752	0.132885	-0.0745697	-0.196699	-0.213275	-0.154288	-0.191249	-0.253986	-0.389605	-0.390139	-0.260087	-0.104158	-0.352247	-0.0650234	-0.0595124	-0.189778	-0.181035	-0.354774	-0.0666499	-0.102938
1664				11	0.0261113	0.339298	-0.108543	0.206882	0.346545	-0.0981869	-0.256365	-1.24139	0.283759	-0.239723	-0.653065	-0.314828	-0.368801	-0.0894014	-0.294711	-0.217778	-0.0716426	-0.597271	-0.206102	-0.134539	-0.118548	-0.260871	-0.0940269	-0.25898	-0.0554113	0.0526976	0.145433	-0.149679	-0.451599	-0.00410233	-0.116852
1664				12	0.00516148	-0.864837	-0.0969905	0.364264	-0.926642	-0.0657276	0.690683	-0.414483	-0.131593	-0.176809	-0.377943	-0.162436	-0.175003	-0.0948474	-0.294416	0.0512204	-0.195689	-0.826334	-0.396426	-0.397379	-0.221814	-0.145151	-0.126304	-0.368645	-0.113631	-0.272992	0.0937693	-0.041615	-0.468685	0.0971552	-0.135885
1665				1	-0.0431889	-3.49615	-0.149741	-0.0101943	-2.19321	-0.000429384	0.538052	-0.415422	0.352142	-0.0977282	-0.179683	0.201027	-0.0851564	-0.102287	-0.241937	0.344348	-0.213991	-0.346213	0.00319538	-0.169686	-0.253907	-0.107084	-0.105754	-0.0978838	-0.0330866	-0.112627	-0.126159	-0.113382	-0.344214	-0.0295099	-0.0205624
1665				2	-0.0515272	-2.06652	-0.115046	0.511064	-1.83537	0.0773048	-0.422975	-0.12344	0.595724	0.0294713	-0.26997	-0.116278	-0.241772	-0.0715878	-0.156562	-0.0694394	-0.0860329	0.028054	-0.267677	-0.306323	-0.39687	-0.078821	-0.118617	-0.134286	-0.287047	-0.642627	-0.188177	-0.0464081	-0.208638	0.0746488	-0.0570904
1665				3	-0.232577	-0.804181	-0.23563	-0.020997	-0.310017	0.183844	-0.319471	-0.62075	0.005885	-0.108283	-0.236865	0.174052	-0.540556	-0.119561	-0.356275	0.323366	-0.454355	0.486465	-0.120186	-0.147948	-0.254876	-0.0800231	-0.170426	-0.29604	-0.00866903	-0.277136	-0.0604448	-0.0467436	-0.139244	0.0590049	-0.101564
1665				4	-0.13158	-0.399481	-0.186641	-0.150377	-0.0507839	-0.0604665	-0.203411	-0.198897	-0.298816	-0.0813873	-0.253233	-0.181539	-0.155709	-0.125594	-0.132352	-0.184066	-0.140966	1.07639	-0.320245	-0.345993	-0.433348	-0.192762	-0.151372	-0.185376	0.00972519	-0.0681704	-0.225919	-0.155593	-0.390088	-0.0352473	-0.118576
1665				5	-0.0682381	-0.925434	-0.283895	0.122986	-0.478409	-0.177927	-0.10961	-0.290096	-0.333165	-0.0713139	-0.331463	-0.19731	-0.363654	-0.138727	-0.111224	-0.21122	-0.115036	1.68653	-0.359316	-0.510336	-0.557248	-0.289154	-0.175218	-0.498696	-0.012668	-0.277823	-0.241313	-0.238731	-0.371639	0.0133675	-0.172998
1665				6	-0.0454785	-0.139791	-0.256188	-0.206244	-0.180689	-0.108561	-0.176313	-0.493852	-0.632814	-0.134246	-0.075871	-0.212502	-0.351913	-0.116273	-0.0782286	-0.201204	-0.0942034	1.70203	-0.0469591	-0.172176	-0.482233	-0.178286	-0.161094	-0.538366	0.0629712	0.0684639	-0.264845	-0.231691	-0.525146	-0.08221	-0.0928968
1665				7	-0.0898893	-0.334173	-0.335244	-0.180307	-0.129476	0.129145	-0.196521	-0.353731	-0.687325	0.0421005	-0.0888908	-0.322384	-0.320855	0.0719437	-0.175371	-0.327128	-0.173141	0.875346	-0.210928	-0.217373	-0.376123	-0.19219	-0.10348	-0.334761	-0.0752659	-0.00692151	0.0206137	-0.149097	-0.244424	-0.0991056	-0.136227
1665				8	-0.0775787	-1.1319	-0.306066	-0.237245	-0.513296	0.0453837	-0.140827	-0.276211	-0.556188	0.028433	-0.377328	-0.208088	-0.266274	0.0845222	-0.0684099	-0.156323	-0.136219	-1.2147	-0.325391	-0.0771826	-0.347242	-0.0971032	-0.0635634	-0.239153	-0.112779	0.0711606	0.246911	-0.13255	-0.145736	0.102676	-0.0437035
1665				9	-0.174687	-1.06015	-0.217604	-0.340104	-0.450763	-0.00698414	-0.22553	-0.191581	-0.157032	-0.18099	-0.0488937	-0.085914	-0.105083	-0.0650243	-0.0305051	-0.134407	-0.152949	0.23073	-0.225381	-0.218553	-0.384886	-0.111404	-0.0544758	-0.243992	0.00663195	-0.0714053	0.341741	-0.102574	-0.155577	0.241261	-0.110859
1665				10	-0.148417	-1.48476	-0.181375	-0.0211749	-0.761604	0.1219	0.0191053	-0.435881	-0.261071	-0.399729	0.403995	-0.189664	0.196254	-0.0713196	-0.146664	-0.257065	-0.181744	0.123465	-0.567551	-0.418513	-0.373877	-0.211961	-0.102264	-0.263113	-0.000473976	-0.0927279	0.0946379	-0.26171	-0.146431	0.174334	-0.0641268
1665				11	-0.152304	0.306637	-0.248747	-0.0487022	0.274634	0.0895081	-0.300051	-1.45807	-0.361577	-0.376366	-0.320201	-0.252073	-0.427209	-0.177139	-0.213399	-0.12342	-0.361281	-0.315014	-0.311271	0.110047	-0.181552	-0.221777	-0.0406651	-0.212326	-0.014924	-0.00913388	-0.000440661	-0.174379	-0.0579851	-0.014978	-0.0309064
1665				12	-0.206167	-0.316625	-0.200319	-0.302263	-0.348496	0.106061	0.354474	-0.62188	0.0592028	-0.165863	-0.171655	0.0118517	-0.199279	-0.076596	-0.121581	0.0169835	-0.192237	0.376539	-0.563861	-0.147824	-0.0800578	-0.19824	-0.101676	-0.217718	-0.00106691	-0.179684	0.134407	-0.198931	-0.311724	-0.203473	-0.144033
1666				1	-0.101416	-0.585482	-0.26171	0.0813021	-0.509554	-0.353442	0.143829	-0.851235	-0.0167491	-0.103755	-0.279758	-0.0856296	-0.176288	-0.121101	-0.0936583	0.0988956	-0.155918	0.456191	-0.167594	0.13101	-0.265832	-0.0914878	-0.150777	-0.269997	-0.039852	-0.309322	0.0949809	-0.165056	-0.27588	-0.0865416	-0.0787175
1666				2	-0.11664	0.755888	-0.310518	0.238976	0.644467	0.000938416	-0.689051	-0.830721	0.038671	0.195565	-0.163567	0.1255	-0.105657	-0.104606	-0.0270259	0.453819	0.235394	0.0272401	-0.249513	-0.0538613	-0.295788	-0.143339	-0.148658	-0.220845	-0.147181	-0.397545	0.0812212	-0.169112	-0.34355	-0.0998336	-0.186372
1666				3	0.0226163	0.202957	-0.242144	-0.127219	0.421296	-0.158633	-0.489591	-0.57148	-0.202609	-0.186425	-0.0840571	-0.116367	-0.165356	-0.0949483	-0.0428097	-0.341277	-0.356817	-0.508674	-0.270695	-0.288782	-0.52745	-0.138611	-0.0636068	-0.371334	0.121622	-0.00661055	-0.331092	-0.0835669	-0.165356	-0.035674	-0.0769556
1666				4	-0.10181	0.64198	-0.28346	0.0244784	0.268907	0.0330568	-0.218145	-0.248845	-0.447998	-0.118096	-0.156037	-0.0589031	-0.0842137	-0.117549	-0.0932269	-0.074122	-0.289446	1.5512	-0.458347	-0.361807	-0.474356	-0.184371	0.0203732	-0.228776	0.0153252	-0.119443	-0.34825	-0.16403	-0.443284	-0.174846	-0.0196019
1666				5	-0.137217	1.25433	-0.337114	0.0714602	0.252879	-0.181263	-0.164782	-0.182701	-0.203313	-0.13743	-0.400264	-0.150296	-0.286899	-0.171967	-0.132753	-0.133962	-0.18903	0.416579	-0.0695304	0.0933475	-0.529214	-0.295063	-0.0863256	-0.22057	0.120189	-0.054002	-0.287843	-0.215454	-0.413896	-0.121242	-0.109899
1666				6	-0.257639	0.0928211	-0.379536	-0.377681	-0.201017	-0.251558	-0.256363	-0.285958	-0.439477	-0.0404902	0.296251	0.110283	-0.127033	-0.132766	-0.366358	0.272492	-0.128808	-0.57691	-0.282108	-0.145967	-0.481688	-0.210078	-0.18275	-0.386557	-0.0210532	0.0455557	-0.204637	-0.200018	-0.55581	-0.0865339	-0.226261
1666				7	-0.126003	0.623411	-0.377013	0.0511169	-0.0098842	-0.0257792	-0.284478	-0.293471	-0.457979	-0.0211967	0.20318	0.0459591	0.0461404	-0.0830036	-0.262419	0.221534	-0.192031	0.0249568	-0.333719	-0.120341	-0.414098	-0.128786	-0.0937753	-0.367738	0.0437527	-0.105818	0.0278216	-0.123967	-0.336963	0.147484	-0.15643
1666				8	-0.148406	-0.0775779	-0.331026	-0.275844	-0.286803	-0.0466697	-0.218195	0.257957	-0.279953	-0.00224857	-0.0955151	0.0336987	-0.0292763	-0.0760098	-0.322846	-0.0580668	-0.12345	0.0641104	-0.09564	0.0163061	-0.334301	-0.148743	-0.0831919	-0.339083	0.182956	0.295756	0.200368	-0.124407	-0.303033	0.071411	-0.0952553
1666				9	-0.0890316	-0.596614	-0.312359	-0.304091	-0.398344	-0.105276	-0.107673	-0.259629	-0.299041	-0.164965	0.141885	-0.0587782	0.0873038	-0.122838	-0.150397	-0.143403	-0.164531	-0.258279	-0.24121	-0.245194	-0.309569	-0.143151	-0.0966358	-0.310179	0.00335226	-0.151045	0.249994	-0.168151	-0.160899	0.196339	-0.211361
1666				10	-0.166203	0.670035	-0.250169	-0.147694	0.375515	-0.106524	-0.141106	-0.151192	-0.436283	-0.261639	0.0991104	-0.0742605	-0.0515732	-0.0555382	-0.249758	-0.139593	-0.0687145	-0.158409	-0.0483188	-0.147459	-0.653107	-0.192193	-0.0846705	-0.39863	0.0379362	0.0827034	-0.162387	-0.0878518	-0.0780178	0.0658346	-0.0130843
1666				11	0.00558065	-0.0310096	-0.218542	-0.14761	-0.143129	-0.308212	-0.182402	-1.01108	0.0333282	-0.40275	-0.187827	0.0303757	-0.146736	-0.125189	-0.293041	0.165851	-0.222514	-1.05494	-0.246967	-0.161024	-0.739859	-0.367357	-0.0983967	-0.339949	0.152912	0.0443243	-0.204382	-0.290165	-0.351396	-0.0154243	-0.0652788
1666				12	-0.119055	0.0691553	-0.411386	-0.527806	-0.176634	0.15387	-0.386762	-1.05837	-0.339679	-0.218903	-0.271141	-0.123057	-0.194405	-0.107272	-0.33686	0.169192	-0.136721	-0.109003	-0.17094	-0.108563	-0.283414	-0.174048	-0.116745	-0.369184	0.190748	0.0327224	-0.182037	-0.0503183	-0.534451	-0.13404	0.00383377
1667				1	-0.0273293	-2.34034	-0.306117	-0.220082	-1.47854	0.225298	-0.457167	-1.01058	-0.0127761	-0.156278	-0.475226	-0.083252	-0.34148	-0.1088	-0.406832	0.234362	-0.342089	0.178794	-0.0416655	0.079913	-0.0467996	-0.123611	-0.0973728	-0.255171	0.0336362	-0.0148152	-0.00383695	-0.10445	-0.375151	0.0655523	-0.113632
1667				2	0.0118483	2.39038	-0.269506	-0.127681	1.25337	-0.463563	0.388874	-0.255882	-0.229353	-0.217332	-0.212001	-0.134845	-0.205921	-0.14771	-0.296099	0.0751606	-0.36979	-0.32936	-0.194015	0.252284	0.0584063	-0.099098	-0.149993	-0.325639	-0.0303352	-0.172276	0.197772	-0.0734963	-0.354142	-0.0805255	-0.0624825
1667				3	-0.0471679	-0.940924	-0.358485	-0.512163	-0.836168	0.0603165	-0.0680195	-0.408143	-0.310523	-0.110448	-0.326491	-0.0169295	-0.598673	-0.0736814	-0.320853	0.0942916	-0.358374	-0.86587	0.0070947	-0.155968	-0.00405814	-0.135664	-0.135407	-0.298086	0.222269	0.122706	0.0635405	-0.129568	-0.308016	-0.0117043	-0.0327909
1667				4	-0.195409	-0.323198	-0.331793	-0.328957	-0.328368	0.0532128	0.0508136	-0.0295786	-0.279068	-0.0332993	-0.356646	-0.328011	-0.109918	-0.241262	-0.353202	-0.486199	-0.000987879	1.45947	-0.194959	-0.159859	-0.00338612	-0.212734	-0.209893	-0.349664	0.140804	0.0657922	-0.086421	-0.205047	-0.198808	0.0475755	-0.199978
1667				5	-0.217254	-1.53923	-0.32213	-0.372805	-0.675721	-0.276778	-0.277317	0.0907477	-0.440116	-0.0784875	-0.37884	-0.233866	-0.396978	-0.0672724	-0.480253	-0.373747	-0.250819	1.74062	-0.0921553	-0.206006	-0.194217	-0.265238	-0.151153	-0.322188	0.0303361	-0.0769893	-0.165442	-0.228607	-0.49909	-0.0900794	-0.216518
1667				6	-0.134098	-0.219614	-0.390584	-0.04648	-0.0424038	-0.130639	-0.534889	-0.0932293	-0.575254	-0.148427	0.120182	-0.0979212	-0.220905	-0.126189	-0.316325	-0.167603	-0.183799	0.711757	-0.187262	-0.1857	-0.144349	-0.16306	-0.0867322	-0.322289	0.0154239	-0.121043	-0.238748	-0.167175	-0.394987	-0.16781	-0.164005
1667				7	-0.108238	0.391281	-0.371364	-0.439636	-0.129542	-0.243646	-0.302533	-0.289961	-0.742842	-0.113516	-0.437354	-0.494118	-0.249276	0.0614972	-0.503351	-0.635422	-0.183738	-0.266719	-0.26643	-0.21045	-0.259132	-0.261169	-0.0863824	-0.37453	-0.0364466	-0.132288	0.0419264	-0.218738	-0.476081	0.0570624	-0.235627
1667				8	-0.191135	-0.762892	-0.425459	-0.784208	-0.483238	-0.131505	-0.336182	-0.254433	-0.5655	-0.0897692	-0.238471	0.0336128	-0.124672	-0.0391255	-0.302577	0.0836139	-0.186064	-0.689748	-0.353028	-0.217079	-0.2171	-0.112843	-0.0688925	-0.303293	0.108228	0.0427974	0.401772	-0.165312	-0.295861	0.128723	-0.149638
1667				9	-0.170329	-1.14062	-0.388266	-0.351571	-0.509643	-0.179874	-0.381462	0.00873061	-0.287361	-0.200394	0.180824	-0.154062	0.0772177	-0.0586099	-0.0967149	-0.174312	-0.163444	-0.00580921	-0.190509	-0.107378	-0.508643	-0.238418	-0.0376854	-0.056996	0.0225955	0.001918	0.338975	-0.180211	-0.242558	-0.0570254	-0.221762
1667				10	-0.13912	-0.188415	-0.266096	-0.45093	-0.208511	0.052108	-0.117816	0.104851	-0.0271687	-0.275975	-0.199462	-0.332101	-0.185746	-0.102819	-0.147125	-0.381838	-0.119038	-0.206789	-0.128536	-0.0459976	-0.717573	-0.28003	-0.134435	-0.255459	0.0854149	0.0509746	0.0647554	-0.0810121	-0.234895	0.0641733	-0.120214
1667				11	-0.204592	0.148971	-0.260805	-0.0145902	0.377285	-0.216874	-0.603791	-0.597505	-0.36698	-0.27186	-0.455658	-0.243627	-0.408058	-0.0637171	-0.0234865	-0.13618	-0.29939	-0.440089	-0.00718657	-0.0972114	-0.353661	-0.292825	-0.0774921	-0.077629	0.0919381	0.0185332	0.052885	-0.151605	-0.518019	-0.111637	-0.138544
1667				12	-0.127039	-1.21465	-0.218088	0.000275884	-1.43539	-0.0833285	0.886336	-0.596596	-0.395124	-0.179243	-0.252421	-0.224102	-0.44797	-0.120547	-0.137294	0.00459674	-0.226682	-0.48787	-0.361152	-0.275698	-0.551282	-0.225836	-0.0109134	-0.304621	-0.00861047	-0.291251	0.00637652	-0.182711	-0.321537	-0.134767	-0.128946
1668				1	-0.0927933	2.04973	-0.359364	0.00189922	1.01564	-0.179819	-0.483484	-0.110788	-0.364442	0.02941	-0.84119	-0.431115	-0.321886	-0.0978825	-0.216766	-0.0620446	0.0949071	-0.19366	-0.17757	0.438649	-0.394601	-0.101551	-0.0659378	-0.294991	-0.0673655	-0.209096	-0.171703	-0.204694	-0.33941	-0.352115	-0.0614255
1668				2	-0.132034	2.96633	-0.271637	-0.779921	1.70838	-0.228904	-0.467554	-0.487631	-0.0821615	-0.0812007	-0.629254	-0.361468	-0.671731	-0.187104	-0.0986354	-0.130356	-0.582597	-0.0633538	-0.146021	-0.026489	-0.291993	-0.182379	-0.117032	-0.277553	0.0316345	-0.256647	-0.158338	-0.165236	-0.448325	-0.257373	-0.152063
1668				3	-0.215894	0.176725	-0.35879	-0.580756	0.0981139	0.516495	-0.0258699	-0.316547	-0.0860454	0.015943	-0.40834	-0.212481	-0.424388	-0.0941949	-0.176704	0.0758661	-0.19428	-0.323946	-0.084048	-0.102814	-0.11386	-0.163075	-0.123728	-0.309778	-0.00824941	-0.219611	0.0345927	-0.179777	-0.59906	-0.0545949	-0.0520113
1668				4	-0.225093	0.655549	-0.345251	-0.346287	0.182386	-0.062193	-0.424892	-0.117563	0.103444	-0.116002	-0.336799	-0.147546	-0.320046	-0.0999348	-0.354106	-0.0326977	-0.287187	-1.73935	-0.11333	-0.0196862	-0.381886	-0.204555	-0.0346786	-0.240016	-0.107087	-0.228799	-0.23087	-0.111514	-0.376229	-0.130546	-0.223503
1668				5	-0.226918	-0.622604	-0.346477	0.0963549	-0.236678	-0.127425	-0.162424	-0.196062	-0.0832053	-0.163462	-0.524793	0.0173146	-0.388988	-0.0448878	-0.397191	0.031409	-0.234076	-1.69404	-0.172003	-0.271825	-0.478375	-0.297018	-0.161738	-0.32271	-0.0616401	-0.159605	-0.264995	-0.228561	-0.585653	-0.307702	-0.181453
1668				6	-0.204464	0.0994605	-0.385087	-0.0979217	-0.0848137	-0.284583	-0.281977	-0.115695	-0.155275	-0.0777121	-0.560265	-0.194115	-0.339607	-0.0506564	-0.34435	-0.0721415	-0.221235	0.328496	-0.132275	-0.165043	-0.454077	-0.221972	-0.186925	-0.378216	0.0554086	-0.0848755	-0.245226	-0.116363	-0.283183	-0.242856	-0.13688
1668				7	-0.200945	-0.222054	-0.389945	-0.27674	-0.16975	-0.101508	-0.547227	-0.251247	-0.213057	-0.138794	-0.90395	-0.89172	-0.398333	-0.164869	-0.451898	-0.897783	-0.135457	-0.670529	-0.34987	-0.20292	-0.440269	-0.176102	-0.144816	-0.329337	-0.0600185	-0.179721	-0.257998	-0.147721	-0.329118	-0.132732	-0.138982
1668				8	-0.137485	-0.41708	-0.396744	-0.440085	-0.31798	-0.416482	-0.326788	0.0494654	-0.187338	-0.0241201	-0.510934	-0.27718	-0.16144	-0.134367	-0.275876	-0.28741	-0.189513	-2.51393	-0.192362	-0.0630902	-0.430286	-0.154852	-0.127132	-0.313093	-0.0442694	-0.0898187	-0.000966136	-0.122466	-0.30509	-0.0370084	-0.0613197
1668				9	-0.162547	0.27911	-0.391327	-0.326846	0.0232186	-0.325069	-0.146473	0.0455613	-0.253009	-0.140005	-0.964494	-0.263381	-0.58098	-0.0805597	-0.185235	-0.212829	-0.198596	-1.26917	-0.014581	-0.0334187	-0.358107	-0.197204	-0.16626	-0.175814	0.0678769	-0.0495613	0.197698	-0.142539	-0.165818	0.0742345	-0.217251
1668				10	-0.193568	1.74518	-0.325635	-0.522545	0.904976	-0.0681379	-0.259299	0.263773	-0.0659184	-0.253359	-0.750998	-0.221129	-0.3307	-0.123709	-0.214077	-0.231541	-0.186415	-0.000596523	-0.349178	-0.295219	-0.437338	-0.213433	-0.123748	-0.0434245	0.0917358	0.00050141	-0.00851917	-0.214698	-0.112518	0.255854	-0.175506
1668				11	-0.310425	1.22344	-0.356072	-0.716938	0.610457	-0.146272	-0.384978	-0.366905	-0.193429	-0.195139	-0.397182	-0.414411	-0.352473	-0.0876143	-0.19779	-0.400494	-0.255204	-0.0138932	-0.0876443	-0.0347152	-0.314881	-0.0722728	-0.175082	-0.219883	0.0999079	-0.115481	0.0897197	-0.0989053	-0.274643	0.269513	-0.0534761
1668				12	-0.0254343	3.00761	-0.280035	-0.849625	1.25783	-0.314767	0.438103	-0.506147	-0.148784	-0.312296	-0.504786	-0.1193	-0.555002	-0.0927608	-0.355953	0.0301566	-0.465356	-0.300537	-0.119224	-0.175804	-0.524197	-0.318508	-0.102706	-0.414608	0.0650399	0.0404567	-0.225065	-0.0865999	-0.570843	0.171137	-0.152287
1669				1	0.0611164	-1.20214	-0.29527	-0.312274	-0.916581	0.0557613	-0.632532	-0.350073	0.062053	-0.125173	-0.204699	-0.140646	-0.133774	-0.0845768	-0.372927	-0.0516619	-0.335994	-0.0977281	-0.301212	0.178375	-0.238547	-0.107437	-0.157521	-0.409798	0.0337221	-0.161972	-0.100488	-0.0659459	-0.252852	0.149722	-0.110856
1669				2	-0.0954572	1.56405	-0.259476	-0.21523	0.716879	-0.442216	-0.205585	-0.202555	0.219718	0.00613677	0.010431	0.113777	0.127262	-0.135804	-0.219464	0.103663	-0.00387192	0.13719	-0.217785	-0.109481	-0.075913	-0.102173	-0.125789	-0.208749	0.138414	0.007142	0.115504	-0.110724	-0.104254	0.214326	-0.181942
1669				3	-0.144223	0.674201	-0.376211	-0.445342	0.236242	-0.0840326	0.214366	-0.129651	0.0232838	0.0749525	-0.13492	0.0504746	0.160528	-0.112458	-0.330035	-0.0724059	-0.0137423	-0.281456	-0.295491	-0.300631	-0.363532	-0.123103	-0.122328	-0.375281	0.0264243	-0.290793	0.0858279	-0.138069	-0.338604	0.112018	-0.0705889
1669				4	-0.361152	-0.253969	-0.385532	-0.34153	-0.0281083	-0.0320776	-0.434089	0.0824059	-0.044994	-0.00132446	-0.341283	-0.0455518	-0.227842	-0.156156	-0.247364	0.0194948	-0.11726	1.04561	-0.271751	-0.0620026	-0.396468	-0.255325	-0.106574	-0.29411	0.0733639	-0.121927	0.0390577	-0.192655	-0.338187	-0.0551581	-0.180489
1669				5	-0.323243	-0.331559	-0.371692	0.115226	-0.0654656	-0.117779	-0.136713	0.0048269	-0.105146	-0.113512	0.0251061	0.0688521	-0.169326	-0.176693	-0.312579	0.0571368	-0.442154	-0.719136	-0.270181	-0.360049	-0.39	-0.277476	-0.176225	-0.366774	0.0920731	-0.169912	-0.1687	-0.199251	-0.420511	-0.257161	-0.203584
1669				6	-0.22619	-0.0568038	-0.421353	-0.555685	-0.334757	-0.0458879	-0.425013	-0.0566913	-0.180814	-0.100129	-0.249442	0.0222113	-0.257782	-0.170833	-0.193553	0.06238	-0.225622	0.810386	-0.267855	-0.222043	-0.336886	-0.245322	-0.182565	-0.382998	-0.00253477	-0.0414032	-0.178028	-0.168941	-0.363137	-0.097814	-0.109472
1669				7	-0.201128	0.920046	-0.402524	-0.229933	0.0290858	-0.159025	-0.392202	0.242211	-0.160765	-0.00904503	-0.25503	-0.377409	-0.230711	-0.0668617	-0.0878638	-0.403834	-0.128045	-0.536992	-0.0765961	-0.00500902	-0.274595	-0.190588	-0.20946	-0.281934	0.166224	0.195637	-0.0309514	-0.14919	-0.251099	-0.123468	-0.139855
1669				8	-0.141223	0.0146787	-0.378607	-0.425659	-0.23577	-0.332334	-0.28174	0.0974412	-0.070629	-0.103229	-0.739169	-0.212885	-0.351567	-0.100061	-0.270091	-0.105999	-0.14786	-1.44033	-0.277107	-0.0571516	-0.579233	-0.236933	-0.159808	-0.349342	0.00894947	-0.0265261	0.00997632	-0.21336	-0.383616	-0.0300542	-0.215777
1669				9	-0.0954823	1.08816	-0.397308	-0.121234	0.33713	-0.192874	-0.258726	-0.0969918	-0.488048	-0.104521	-0.307566	-0.260528	-0.252122	-0.111251	-0.22499	-0.139663	-0.265773	-0.181762	-0.0883267	-0.0837212	-0.613011	-0.232543	-0.107327	-0.21979	0.0945436	-0.0212963	-0.0254198	-0.186261	-0.0949047	0.0627981	-0.146397
1669				10	-0.189041	1.07875	-0.335855	-0.550729	0.606016	-0.0917967	-0.239224	0.147375	-0.240635	-0.298001	-0.197531	-0.16966	-0.295428	-0.15752	-0.213951	-0.258598	-0.186798	0.0256381	-0.201363	-0.250686	-0.792084	-0.269849	-0.122367	-0.206898	0.0971928	-0.0186789	-0.105321	-0.118453	-0.378391	0.208333	-0.0277804
1669				11	0.0473707	0.518886	-0.299877	-0.585474	0.262492	-0.306515	0.103603	-0.631486	0.347331	-0.462357	-0.40566	-0.187932	-0.374994	-0.0489485	-0.222869	-0.301349	-0.241835	-0.730267	-0.276985	-0.121255	-0.312701	-0.171869	-0.047934	-0.310579	0.101683	-0.0789791	0.130297	-0.186584	-0.595114	0.0890488	-0.0460889
1669				12	0.0259058	-0.00180903	-0.302971	-0.132492	0.0943434	-0.21481	-0.728606	-0.455381	-0.00170269	-0.209881	-0.170627	-0.283845	-0.116656	-0.104333	-0.318288	-0.383473	-0.192622	-0.956832	-0.473142	-0.117798	-0.253438	-0.321928	-0.0630241	-0.407972	0.157737	-0.0256625	0.152851	-0.143885	-0.503576	0.0201174	-0.102493
1670				1	-0.147586	-1.12247	-0.250142	-0.205409	-0.843386	0.030072	1.06098	-0.040068	-0.0496813	0.0604979	-0.0556168	0.0551855	-0.122592	-0.103326	-0.222351	0.100476	0.00318648	0.0082109	-0.425107	0.448367	0.0712863	-0.0658187	-0.157674	-0.231114	-0.0429095	-0.1362	0.277713	-0.106464	-0.312329	0.200986	-0.0355885
1670				2	0.00320994	-2.34451	-0.196144	-0.1512	-1.26648	-0.065402	-1.10609	0.0292654	0.425851	0.0726021	-0.0792851	0.230282	-0.249819	-0.127933	-0.0107314	0.374656	-0.172925	-0.399981	-0.235355	-0.0302369	0.0828032	0.0166857	-0.15364	0.0196829	-0.0376556	-0.280113	0.392077	-0.156388	-0.0148741	0.152799	-0.016359
1670				3	-0.2473	1.2887	-0.33297	0.0833632	0.593779	-0.234026	-0.0252024	0.108276	0.107903	0.0407118	-0.323665	-0.223673	0.221529	-0.14786	0.0570381	-0.217815	-0.00899874	0.0568083	-0.317254	-0.0563498	-0.0466302	-0.0148795	-0.060927	-0.099354	-0.0702344	-0.249187	0.118743	-0.101605	-0.463059	-0.0168713	-0.12261
1670				4	-0.382566	-0.0123641	-0.367731	-0.229042	-0.140325	0.0254461	-0.235775	0.156651	0.346753	0.0937588	-0.31729	-0.23399	-0.290888	-0.212632	-0.116794	-0.124411	-0.237551	1.13866	-0.125696	-0.00333163	-0.08141	-0.183385	-0.172551	-0.209124	-0.141438	-0.139515	-0.309115	-0.170219	-0.366637	-0.0531954	-0.207823
1670				5	-0.12629	-0.549609	-0.359603	0.0467708	-0.250077	-0.311955	-0.197489	-0.310786	0.0385637	-0.0353642	-0.488712	-0.205647	-0.223533	-0.157862	-0.0677942	-0.147312	-0.196331	-0.42944	-0.173887	-0.00649932	-0.128707	-0.161383	-0.119691	0.0181788	-0.145583	-0.29595	-0.276185	-0.164396	-0.442734	-0.0762702	-0.121952
1670				6	-0.157245	0.0349664	-0.427111	-0.493628	-0.2016	-0.441389	-0.391088	-0.170884	0.0150918	-0.0754843	-0.582684	-0.145723	-0.406622	-0.0651027	-0.292176	-0.143588	-0.190139	-0.768927	-0.308579	-0.255126	-0.21669	-0.170994	-0.149974	-0.0741369	0.0623561	0.014073	-0.309932	-0.138519	-0.344266	-0.0358671	-0.19205
1670				7	-0.178274	-0.553406	-0.414239	0.187931	-0.228232	-0.177065	-0.515702	0.129153	0.250952	0.0335938	-0.437291	-0.4639	-0.220675	-0.017612	-0.129068	-0.505746	-0.150968	-1.96488	-0.390425	-0.307891	-0.175009	-0.184547	-0.184647	-0.22177	-0.0481329	0.0178678	-0.0807275	-0.15356	-0.283898	-0.0815828	-0.115151
1670				8	-0.249469	0.151354	-0.411653	-0.339638	-0.00234152	-0.24455	-0.43825	-0.163546	0.24333	-0.0394381	-0.209	-0.239436	-0.172062	-0.000581805	-0.107396	-0.247875	-0.14082	-1.3706	-0.399244	-0.113799	-0.355968	-0.135458	-0.179849	-0.189617	-0.101323	-0.140309	0.0413713	-0.152743	-0.379124	-0.0738508	-0.118395
1670				9	-0.215956	0.523585	-0.345341	-0.281473	0.015883	-0.11263	-0.276163	0.302671	-0.0589938	-0.0295944	-0.446622	-0.0501703	-0.200704	0.0222769	-0.0643701	-0.232377	-0.180339	0.110785	-0.398423	-0.11865	-0.218409	-0.119468	-0.162428	-0.201621	-0.134225	-0.118323	0.15228	-0.0553905	-0.165971	0.130692	-0.137137
1670				10	-0.115879	0.0197125	-0.292434	-0.566547	-0.0217838	0.0716459	-0.244746	0.0414321	-0.348256	-0.180127	-0.436806	-0.245016	-0.305079	-0.0669689	-0.0643405	-0.329761	-0.126786	-0.260128	-0.208412	-0.034215	-0.33679	-0.207793	-0.113056	-0.211273	0.0376472	-0.013284	0.0708208	-0.181909	-0.343734	0.115365	-0.158636
1670				11	-0.0794051	0.285505	-0.398943	-0.122479	0.430925	-0.412594	-0.513554	-0.586771	-0.110774	-0.525292	-0.476683	-0.383134	-0.511689	-0.0405962	-0.213947	-0.478861	-0.217721	-0.917154	-0.376299	-0.181249	-0.283272	-0.300046	-0.196984	-0.400312	0.189812	0.0248494	0.0457801	-0.287578	-0.706466	0.0134319	0.00968768
1670				12	-0.0271605	-0.410517	-0.338871	-0.229699	-0.356444	-0.286196	0.411294	-0.42984	0.200842	-0.201252	-0.180264	-0.203022	-0.0406324	-0.134705	-0.368116	-0.226396	-0.10805	-0.778165	-0.30783	-0.121679	-0.0108859	-0.235573	-0.124494	-0.405056	0.169362	0.287566	0.162472	-0.210753	-0.819189	0.0912138	-0.0275784
1671				1	-0.0389545	3.1256	-0.178155	0.0270921	1.83067	-0.820992	0.341166	-0.181964	0.0481771	-0.128576	-0.160921	-0.054709	-0.0304427	-0.0307266	-0.120012	-0.292632	-0.195352	-0.717269	0.0968786	0.325531	-0.0118837	-0.112774	-0.227763	-0.216506	-0.0909918	-0.213818	0.230399	-0.095403	-0.589616	0.285031	-0.0223878
1671				2	0.0449942	1.83137	-0.318113	-0.515327	1.20636	-0.219398	-0.536119	-0.24583	-0.0457063	-0.169772	-0.203876	0.178247	-0.207684	-0.0397008	-0.101279	0.382701	-0.31392	-0.38203	-0.159969	-0.303937	0.0490012	-0.127384	-0.196719	-0.119681	0.0808918	0.0395221	0.128699	-0.208119	-0.469744	0.0212564	-0.106544
1671				3	-0.0655776	0.834037	-0.437706	-0.557152	0.483305	-0.104412	-0.387795	-0.23549	-0.712131	-0.199959	-0.916284	-0.222849	-0.846856	-0.132067	-0.0887825	0.169608	-0.439775	-0.362645	-0.28369	0.081995	-0.128406	-0.425139	-0.250895	-0.245625	0.0861338	0.0408281	-0.0239553	-0.360964	-0.45727	-0.0891713	-0.23101
1671				4	-0.155849	0.44619	-0.412166	-0.447984	0.220566	-0.109044	-0.427089	-0.294681	-0.712858	-0.0482777	-0.928548	-0.392868	-0.362252	-0.171426	-0.278642	-0.347769	-0.0681342	1.05699	-0.449127	-0.476325	-0.279769	-0.221769	-0.373889	-0.452393	-0.0596451	-0.120565	-0.183045	-0.213439	-0.272571	-0.0177684	-0.0141545
1671				5	-0.210336	1.0712	-0.35589	0.117879	0.213051	-0.277672	-0.107306	0.117034	-0.474603	-0.0206719	-0.44221	-0.197192	-0.168725	-0.214466	-0.0670408	-0.0533268	-0.196684	1.10077	-0.285895	-0.312086	-0.328933	-0.305811	-0.241633	-0.466635	-0.176893	-0.185795	-0.0543546	-0.208126	-0.346323	-0.155368	-0.168874
1671				6	-0.236427	-1.1074	-0.462925	-0.430462	-0.519374	-0.484959	-0.464418	-0.501165	-0.252122	0.010354	-0.340407	-0.442124	-0.111669	-0.13292	0.0109971	-0.744335	-0.0997766	-0.814955	-0.128331	-0.108318	-0.238942	-0.199841	-0.203769	-0.273192	0.0495559	0.0170198	-0.0532814	-0.1031	-0.365105	0.0409704	-0.0942129
1671				7	-0.175281	-0.467486	-0.424434	-0.208992	-0.192931	0.000263723	-0.291534	-0.152018	-0.109604	-0.078381	-0.0504405	-0.251891	-0.0337699	-0.127203	0.00369275	-0.33947	-0.13063	-0.877261	-0.349139	-0.175576	-0.188944	-0.147528	-0.150954	-0.369281	0.0111418	-0.0470817	-0.0956106	-0.0726424	-0.319133	-0.0322988	-0.0594852
1671				8	-0.216953	-0.548844	-0.412884	-0.26348	-0.183631	0.0910132	-0.135969	-0.504754	0.0428029	-0.0679548	-0.0147331	0.129955	0.136768	-0.145779	-0.0308237	0.179541	-0.199177	0.519711	-0.286018	-0.177809	-0.361969	-0.128727	-0.159175	-0.249477	0.062092	-0.200088	-0.00487429	-0.0373465	-0.198043	0.0905303	-0.116282
1671				9	-0.171189	-0.247782	-0.287056	-0.439571	-0.055655	-0.186892	-0.320804	-0.134827	-0.195079	-0.14085	-0.102794	-0.245994	-0.0017999	-0.0420236	-0.0926275	-0.261087	-0.156913	-0.623642	-0.162835	0.073596	-0.571971	-0.205821	-0.114103	-0.214661	-0.0186538	0.038542	-0.0834452	-0.11848	-0.435237	0.0861898	-0.112314
1671				10	-0.17397	-0.0216827	-0.317485	-0.8699	-0.00597188	-0.0224627	-0.416442	0.0412142	-0.247204	-0.260277	-0.497885	-0.415388	-0.332306	-0.0535851	-0.0548992	-0.425135	-0.198262	-0.189241	-0.561665	-0.190738	-0.581861	-0.280105	-0.0924678	-0.0229949	-0.107102	-0.00607799	-0.0207014	-0.176479	-0.326528	0.0196939	-0.128981
1671				11	-0.133248	0.047597	-0.281557	0.0171187	0.217899	-0.10926	-0.372962	0.0922921	-0.0232895	-0.274517	-0.208684	0.0434629	-0.129759	-0.117964	-0.139266	0.0192905	-0.18417	-0.344595	-0.442787	-0.147733	-0.340602	-0.163452	-0.081015	-0.103464	-0.0126113	0.0686697	0.0508785	-0.0943906	-0.358368	0.0186237	-0.135835
1671				12	0.0384485	0.0642229	-0.319246	-0.111857	0.329221	-0.260165	-0.774277	0.115799	0.235577	-0.237011	0.0365805	0.0711662	-0.0862648	-0.105088	-0.173202	-0.0872287	-0.403117	-0.373093	-0.248319	-0.267983	-0.442471	-0.209046	-0.201665	-0.130836	-0.130137	-0.223711	-0.190531	-0.0781141	-0.213858	-0.140121	-0.104116
1672				1	0.00539703	-1.66814	-0.350085	0.33325	-0.334833	-0.686641	-0.509479	-0.383449	0.0114568	-0.090608	-0.483417	-0.345673	-0.235564	-0.0512211	-0.0888422	0.0491586	-0.389979	-0.977613	-0.333511	0.231868	-0.197484	-0.113821	-0.117833	-0.222943	0.0425664	-0.0367783	-0.273679	-0.0456975	-0.259732	-0.189981	-0.152114
1672				2	-0.124275	-2.5447	-0.271198	0.354558	-1.43137	-0.271501	-0.177136	0.499497	-0.480073	-0.0340148	-0.348375	-0.231699	-0.166542	-0.104118	-0.219817	-0.218994	-0.216617	-0.336401	-0.102867	-0.58294	-0.131985	-0.123262	-0.268624	-0.283229	0.223684	0.245407	-0.0935854	-0.0334668	-0.315484	-0.102479	-0.165323
1672				3	-0.160594	1.03483	-0.391522	-0.723531	0.399074	-0.0347722	-0.0350147	-0.160471	-0.422151	-0.0363565	-0.804159	-0.503249	-0.568007	-0.14898	-0.247218	-0.302155	-0.292257	-0.184799	-0.235833	-0.317249	-0.107139	-0.090155	-0.240971	-0.369581	-0.0318643	-0.0566088	-0.327622	-0.0580389	-0.357577	-0.135066	-0.164108
1672				4	-0.118928	-0.324185	-0.509512	-0.160965	-0.211494	-0.0762841	-0.191361	-0.0762235	-0.336408	-0.0529163	-0.615179	-0.29493	-0.436754	-0.184264	-0.117122	-0.227727	-0.276504	-1.40082	-0.355005	-0.262134	-0.147849	-0.245614	-0.274156	-0.472255	-0.012318	-0.10705	-0.301154	-0.21083	-0.545655	-0.0781607	-0.205143
1672				5	-0.295014	-0.474201	-0.473117	-0.232955	-0.370051	-0.361047	-0.138455	0.151689	-0.418737	0.0435161	-0.459748	-0.204707	-0.226615	-0.131584	-0.066129	-0.208793	-0.359654	-1.899	-0.395838	-0.33617	-0.263854	-0.295071	-0.250579	-0.479986	-0.122299	-0.25965	-0.283919	-0.285356	-0.368174	-0.105693	-0.18732
1672				6	-0.141851	0.664873	-0.443518	-0.220094	-0.03999	-0.105416	-0.198297	0.088373	-0.428203	-0.135558	-0.127469	-0.296621	-0.192117	-0.10914	-0.259402	-0.275272	-0.233587	0.727384	-0.337548	-0.137577	-0.311421	-0.2118	-0.133611	-0.252913	-0.0103711	-0.0494293	-0.122318	-0.159736	-0.459466	-0.0657324	-0.147342
1672				7	-0.146953	-1.55371	-0.369401	0.109409	-0.388396	-0.238883	-0.552657	0.107612	-0.194901	-0.135355	-0.255442	-0.356244	-0.23437	-0.266639	-0.254606	-0.225993	-0.18811	-1.33839	-0.0446136	-0.0454667	-0.387422	-0.175264	-0.183314	-0.212411	-0.0796604	-0.16147	0.0770064	-0.100284	-0.345488	0.0505698	-0.136647
1672				8	-0.207545	-1.34704	-0.446344	-0.491139	-0.613527	-0.157588	-0.419684	0.319904	-0.0725058	-0.0615538	-0.227195	-0.173067	-0.28698	-0.0799771	-0.210042	-0.110199	-0.182953	0.639426	-0.322431	-0.241419	-0.400415	-0.163693	-0.182151	-0.128418	0.0124065	0.0150316	0.163463	-0.147706	-0.141709	0.000837199	-0.101979
1672				9	-0.235119	-0.988656	-0.358194	-0.308231	-0.461114	-0.0636248	-0.305527	-0.344071	-0.104656	-0.140032	-0.817485	-0.306672	-0.334205	-0.0263604	-0.160718	-0.237804	-0.11033	-0.0489429	-0.332436	-0.171967	-0.399068	-0.16224	-0.205046	-0.214602	-0.00874796	-0.233893	0.364074	-0.0296813	-0.313664	0.117594	-0.103403
1672				10	-0.188588	1.09266	-0.267253	-0.590743	0.596819	-0.188921	-0.300435	0.52689	-0.259152	-0.224562	-0.704825	-0.452132	-0.470644	0.0712147	-0.201109	-0.535641	-0.149885	-0.0592875	-0.1626	-0.0403891	-0.576986	-0.210572	-0.172815	-0.185022	0.017766	-0.120409	0.382222	-0.0876993	-0.355999	0.257433	-0.130224
1672				11	-0.238722	0.428294	-0.370873	-0.766538	0.211815	-0.178255	-0.0862889	0.327798	-0.105973	-0.376181	-0.384127	-0.306737	-0.433908	-0.0774843	-0.387325	-0.246901	-0.427596	-0.515287	-0.0943886	-0.188545	-0.562272	-0.321609	-0.251986	-0.447605	-0.0131215	-0.213753	-0.154654	-0.195743	-0.393715	-0.190984	-0.067455
1672				12	-0.15498	1.19366	-0.37557	-0.563231	0.862009	-0.39675	-0.0405358	-0.113964	0.247309	-0.44434	-0.276593	-0.428317	-0.285903	-0.122552	-0.397382	-0.463686	-0.156737	-0.208619	-0.429639	-0.161689	-0.375016	-0.250658	-0.236078	-0.513615	0.0519879	-0.106146	-0.176927	-0.273558	-0.293982	-0.0633406	-0.130856
1673				1	0.10687	2.69346	-0.390443	-0.911773	1.05231	-0.33638	0.208799	-0.126893	-0.066796	-0.117187	-0.0462507	0.0808255	0.0113816	-0.102836	-0.224817	0.213459	-0.0931356	-0.997219	-0.417299	-0.0144178	-0.244862	-0.183405	-0.175294	-0.38897	0.109303	0.0966894	0.186541	-0.12565	-0.421916	-0.0868486	-0.181886
1673				2	-0.245306	-0.608835	-0.394508	-1.00787	-0.535721	0.275971	0.247103	-0.230526	-0.13587	-0.0370303	-0.127745	0.548308	-0.183703	-0.0899518	-0.279542	0.828149	-0.18394	0.345012	-0.210956	-0.338636	-0.525612	-0.256225	-0.244176	-0.346244	0.00924797	-0.154823	0.115801	-0.136143	-0.529771	-0.159654	-0.219183
1673				3	-0.207633	0.768264	-0.445504	-1.00541	0.175654	-0.114644	0.116419	-0.379965	-0.243617	-0.0245234	-0.561753	-0.126883	-0.151514	-0.163527	-0.313129	0.033657	-0.0543917	-0.188724	-0.374291	-0.367123	-0.594493	-0.248389	-0.290402	-0.449768	-0.0751554	-0.262335	-0.306579	-0.068865	-0.43561	-0.072009	-0.306524
1673				4	-0.16211	-1.11169	-0.381059	-0.603752	-0.551995	-0.0603507	-0.346911	-0.275236	-0.221492	0.0236427	-0.958362	-0.281553	-0.565995	-0.0778363	-0.349636	-0.261843	-0.205524	1.02363	-0.262577	-0.221858	-0.464528	-0.354417	-0.115516	-0.363826	-0.0389885	-0.280968	-0.394729	-0.268499	-0.53696	-0.237421	-0.0994301
1673				5	-0.202548	-0.491757	-0.320287	0.0595662	-0.257757	-0.0959032	-0.0781251	-0.276804	0.0929422	-0.039177	0.289795	-0.041858	-0.126071	-0.117049	-0.269918	-0.30577	-0.239453	0.807055	-0.267644	-0.17785	-0.392768	-0.233815	-0.141978	-0.236	-0.0110067	-0.237355	-0.078	-0.11675	-0.468487	0.0605687	-0.112228
1673				6	-0.257768	-1.15559	-0.378876	-0.571186	-0.429334	-0.1712	-0.277336	-0.556732	0.339532	-0.0773574	-0.254311	-0.356394	-0.211465	-0.13824	-0.245085	-0.615861	-0.179969	0.35729	-0.411968	-0.528874	-0.238133	-0.207114	-0.274507	-0.212158	-0.134245	-0.282738	0.040152	-0.0973413	-0.241484	0.108834	-0.184039
1673				7	-0.161201	-1.11098	-0.488307	-0.385657	-0.433518	-0.279189	-0.358657	0.0731556	0.523279	-0.0215172	-0.528346	-0.33788	-0.242762	-0.0365615	-0.321865	-0.315153	-0.224384	0.270703	-0.5461	-0.393941	-0.394119	-0.232824	-0.200774	-0.306424	-0.181647	-0.332329	0.0616141	-0.178752	-0.354264	0.0908511	-0.18549
1673				8	-0.24211	-0.00436621	-0.423445	-0.692134	-0.326544	-0.0919521	-0.22144	0.0786132	0.114142	-0.0199621	-0.311238	-0.191555	-0.243819	-0.09688	-0.247949	-0.256354	-0.180628	1.08502	-0.454211	-0.363856	-0.741506	-0.221516	-0.226018	-0.352592	-0.0263155	-0.176336	0.207662	-0.129078	-0.327668	0.212526	-0.140242
1673				9	-0.202792	-0.50657	-0.346645	-0.820544	-0.161232	-0.228244	-0.137018	-0.266831	-0.359066	-0.145056	-0.490126	-0.176828	-0.185466	-0.157721	-0.219661	-0.243617	-0.246989	0.171358	-0.16908	-0.0835009	-0.960742	-0.1911	-0.200434	-0.172166	-0.164843	-0.235573	0.223894	-0.0497943	-0.306807	0.151858	-0.143667
1673				10	-0.228848	-0.795491	-0.283599	-0.656007	-0.507293	-0.263338	-0.132725	-0.353729	-0.252999	-0.194989	-0.651533	-0.558812	-0.528906	-0.0797501	-0.361406	-0.722857	-0.290932	-0.282843	-0.158689	-0.262414	-0.732983	-0.186133	-0.185346	-0.142849	-0.0834284	-0.206268	0.316873	-0.0319837	-0.302444	0.336731	-0.100605
1673				11	-0.135054	-0.301413	-0.402567	-0.113809	0.114245	-0.464596	-0.553431	-0.117492	-0.563073	-0.22109	-0.432327	-0.0936239	-0.450822	-0.0779898	-0.363637	-0.0294782	-0.36184	-0.716552	-0.180225	-0.223601	-0.644717	-0.24225	-0.152678	-0.218981	-0.105211	-0.260844	-0.0941067	-0.00779889	-0.257099	0.173394	-0.171045
1673				12	-0.11375	-0.592372	-0.369581	-0.901892	-0.7566	-0.06992	-0.457737	-0.518939	-0.540578	-0.421305	-0.843306	-0.534156	-0.673207	-0.110854	-0.482906	-0.256517	-0.419415	-0.350805	-0.2497	-0.151986	-0.591735	-0.347716	-0.2353	-0.352751	0.00312545	-0.110972	-0.422731	-0.0181794	-0.594391	-0.308774	-0.204851
1674				1	-0.263934	0.723302	-0.437571	0.0572693	0.414567	0.114168	-0.64085	-0.868952	-0.166932	-0.355737	-0.826991	-0.388886	-0.718606	-0.0794289	-0.422828	-0.133884	-0.409057	-0.470921	-0.204818	0.153289	-0.448289	-0.187012	-0.27278	-0.353875	0.0137178	-0.00563513	-0.33525	-0.121249	-0.175324	-0.229104	-0.162967
1674				2	0.0443705	-1.67137	-0.285322	0.298264	-0.902153	-0.128144	-0.3459	-0.252084	-0.437264	-0.229447	-0.715552	-0.322953	-0.728016	-0.189857	-0.471074	0.0186782	-0.649487	-0.742828	-0.566713	-0.677129	-0.343716	-0.137636	-0.249522	-0.363986	0.0419113	-0.307775	-0.198841	-0.0381074	-0.227122	-0.169087	-0.110115
1674				3	-0.162576	-2.0467	-0.289852	-0.580621	-1.35971	-0.111108	-0.166504	-0.0214962	-0.315677	-0.00958881	-0.936345	-0.115374	-0.990902	-0.141186	-0.592609	0.25225	-0.62055	-0.379431	-0.436686	-0.523059	-0.315559	-0.221154	-0.153372	-0.429724	-0.0857564	-0.158559	-0.492095	-0.173542	-0.390284	-0.186974	-0.0797041
1674				4	-0.233949	-0.0282609	-0.442794	-0.59582	-0.0985181	-0.078496	-0.169514	-0.0247432	-0.146564	-0.104214	-0.881855	-0.32121	-0.681438	-0.162099	-0.567335	-0.196019	-0.5538	1.20428	-0.318325	-0.215864	-0.480059	-0.376277	-0.202117	-0.483308	-0.097052	-0.0567263	-0.346818	-0.225191	-0.519933	-0.14586	-0.111073
1674				5	-0.268502	-0.205744	-0.380048	-0.313599	-0.253014	-0.209317	-0.289187	-0.120008	-0.25431	-0.0845471	-0.125019	-0.0582355	-0.0943387	-0.088547	-0.50292	-0.184238	-0.44011	1.0379	-0.32638	-0.199237	-0.309443	-0.261334	-0.228043	-0.408869	-0.0430959	-0.102008	-0.15195	-0.264188	-0.566181	-0.150384	-0.170087
1674				6	-0.178899	-0.523908	-0.523945	-0.342484	-0.325342	-0.236382	-0.251625	0.0540773	-0.101894	-0.120206	-0.379097	-0.0620602	-0.231207	-0.0665618	-0.403166	0.0417873	-0.340185	1.542	-0.239208	-0.125967	-0.316386	-0.217587	-0.232068	-0.424198	-0.0266007	-0.236314	-0.104747	-0.193912	-0.400319	-0.19555	-0.140148
1674				7	-0.279987	-1.52084	-0.540683	-0.364756	-0.674053	-0.281812	-0.516715	0.179307	-0.145741	0.00626717	-0.0236213	-0.0665039	-0.181872	-0.147962	-0.174702	-0.209865	-0.199298	-0.907943	-0.2383	-0.117674	-0.317314	-0.219967	-0.196085	-0.514479	0.0283298	0.054271	-0.013751	-0.104245	-0.386947	-0.141645	-0.139085
1674				8	-0.254403	-1.60373	-0.510282	-1.0342	-0.9525	-0.315252	-0.470368	-0.136811	-0.0651492	-0.0866163	-0.436944	-0.212361	-0.310833	-0.193028	-0.287236	-0.234628	-0.165463	-2.65314	-0.401927	-0.113186	-0.386234	-0.208353	-0.202802	-0.298126	-0.132792	-0.126842	0.14988	-0.0960604	-0.278709	0.0128649	-0.101214
1674				9	-0.200167	-1.73252	-0.313433	-0.588938	-0.827013	-0.0468306	-0.389391	0.0604233	-0.181213	-0.0184154	-0.554862	-0.105932	-0.445892	-0.0517606	-0.247769	-0.163276	-0.185615	-0.674433	-0.371866	-0.316439	-0.162974	-0.0751411	-0.149633	-0.125453	-0.0117635	-0.208815	0.234622	0.0633763	-0.217406	0.200102	-0.105455
1674				10	-0.250338	-0.301783	-0.337573	-1.00489	-0.289204	-0.147499	-0.0580413	0.0512525	-0.347691	-0.298575	-0.906704	-0.516995	-0.71078	0.0538025	-0.215504	-0.637378	-0.271441	-0.130801	-0.134706	-0.225855	-0.377802	-0.259375	-0.0463996	-0.0495014	-0.0247774	-0.0178921	0.25315	-0.0644143	0.245612	0.288935	-0.115446
1674				11	-0.15967	0.71563	-0.400326	-0.342838	0.353279	-0.213141	-0.109251	-0.139474	0.0306007	-0.115572	-0.39293	-0.335307	-0.454462	-0.0985815	-0.309453	-0.244064	-0.48392	-0.502058	-0.015928	-0.437622	-0.452748	-0.246149	-0.201668	-0.0382346	-0.0624656	-0.237153	-0.0359212	-0.0553319	-0.236421	0.100424	-0.221575
1674				12	-0.262995	-0.167823	-0.425922	-0.0073578	0.284884	-0.182088	-0.504277	-0.580516	0.0111624	-0.289938	-0.435367	0.00543965	-0.276854	-0.102996	-0.237852	0.0938535	-0.427699	-0.234811	-0.105912	-0.277566	-0.57281	-0.309483	-0.292381	-0.27359	-0.0358913	-0.187029	-0.376779	-0.0319963	-0.475157	-0.0429911	-0.238363
1675				1	-0.0811165	1.17552	-0.336848	-0.63893	0.96082	-0.589849	-0.969782	-0.59561	-0.0223948	-0.432727	-0.583147	0.120457	-0.297202	-0.149659	-0.341728	0.249448	-0.633457	-0.360601	-0.0791353	-0.246578	-0.443915	-0.20268	-0.271809	-0.287284	0.0812093	0.0137359	-0.554759	-0.101915	-0.498286	-0.158077	-0.14945
1675				2	-0.00863088	-0.0387637	-0.303347	-0.554652	-0.26317	-0.379161	-0.458239	0.116436	-0.173968	-0.300267	-0.393838	-0.0692088	-0.305198	-0.180373	-0.307767	-0.0463109	-0.632443	0.127132	-0.0918004	-0.699245	-0.224173	-0.0448053	-0.156543	-0.334222	-0.0331409	-0.229615	-0.312786	0.0484767	-0.56687	-0.0385562	-0.116384
1675				3	-0.380916	-0.989859	-0.49198	-0.987959	-0.850885	0.115911	-0.00332222	-0.234872	-0.296748	-0.09578	-0.820147	-0.236802	-0.557709	-0.164139	-0.491424	0.102093	-0.320873	0.224759	-0.205916	-0.261048	-0.220277	-0.196919	-0.243083	-0.394171	-0.0453664	-0.114131	-0.328267	-0.123993	-0.479408	-0.0491151	-0.112636
1675				4	-0.358132	-0.462701	-0.476257	-0.0100263	-0.291632	0.0980308	-0.817656	-0.113075	-0.117879	-0.0559013	-0.738924	0.114958	-0.573467	-0.260265	-0.49743	-0.114346	-0.25485	-0.468181	-0.152275	-0.339352	-0.35627	-0.318597	-0.271001	-0.446675	-0.0816502	-0.200819	-0.178742	-0.245462	-0.675176	-0.151809	-0.21279
1675				5	-0.336831	-1.65143	-0.536897	-0.214002	-0.911736	-0.127618	-0.547522	-0.193216	-0.249629	-0.217154	-0.321619	-0.0601619	-0.323924	-0.127938	-0.283374	-0.204431	-0.387717	0.117506	-0.26998	-0.215771	-0.474189	-0.249859	-0.175513	-0.284804	-0.109641	-0.106158	-0.185246	-0.199838	-0.382492	-0.144611	-0.120264
1675				6	-0.254841	-2.82516	-0.481583	-0.351077	-1.09784	-0.3254	-0.67519	-0.324842	-0.0332786	-0.112123	-0.199021	0.209988	-0.0890938	-0.175494	-0.432368	0.42918	-0.376205	1.85432	-0.142884	-0.255895	-0.383156	-0.28159	-0.255252	-0.465763	0.10038	-0.0191883	-0.086639	-0.149076	-0.473919	-0.155488	-0.207055
1675				7	-0.219173	-1.71557	-0.462012	-0.877064	-0.647849	-0.35456	-0.891822	-0.381892	0.00682634	-0.146254	0.545583	0.957513	0.179403	-0.0609641	-0.0877284	0.969249	-0.364816	-0.424374	-0.197303	-0.0901121	-0.137964	-0.174976	-0.198664	-0.305129	0.00866032	-0.129003	-0.00761121	-0.0793067	-0.336743	-0.0734575	-0.126099
1675				8	-0.223743	-1.42908	-0.425432	-1.112	-0.769176	-0.369363	-0.744463	0.0802098	0.0382615	-0.161238	-0.209872	-0.0459866	-0.228238	-0.189392	-0.131797	0.16648	-0.305975	0.22291	-0.434406	-0.148304	-0.467281	-0.191536	-0.182765	-0.260078	-0.122698	-0.178207	0.048501	-0.132018	-0.358059	-0.064438	-0.15922
1675				9	-0.295081	-1.48095	-0.41503	-0.596264	-0.599319	-0.159702	-0.786707	-0.276751	-0.342807	-0.29623	0.483476	-0.193107	0.120097	-0.155877	-0.216493	-0.252564	-0.243756	-0.0312494	-0.503358	-0.19379	-0.587668	-0.209642	-0.179308	-0.0893866	-0.0122603	-0.0372275	-0.102742	-0.078889	-0.212987	0.0299821	-0.0721512
1675				10	-0.15605	-0.152476	-0.323388	-0.159845	0.0081015	-0.288071	-0.392802	-0.228464	-0.170243	-0.286412	-1.20956	-0.576493	-0.925513	-0.0876465	-0.231842	-0.476302	-0.289984	-0.712579	-0.289265	-0.0707006	-0.729237	-0.252375	-0.178354	-0.306793	-0.02038	-0.0995886	0.200261	-0.0836061	-0.358631	0.0705171	-0.0209483
1675				11	-0.293133	-0.509384	-0.446568	-0.0631156	-0.0777844	-0.182096	-1.15672	-0.148596	-0.383437	-0.362862	-0.475742	-0.252502	-0.272203	-0.219788	-0.325002	-0.157364	-0.467477	-0.953831	-0.408853	-0.148424	-0.475014	-0.224262	-0.268265	-0.292795	-0.10851	-0.167826	-0.156967	-0.143255	-0.664736	0.0389999	-0.114092
1675				12	-0.203647	0.871791	-0.376373	0.130242	0.774155	-0.281398	-0.411264	-0.411374	-0.315347	-0.232929	-0.502082	-0.454334	-0.288207	-0.0523593	-0.315895	-0.296922	-0.362677	-0.00148022	-0.132075	-0.111759	-0.283671	-0.267153	-0.263166	-0.48307	-0.0996997	-0.184911	-0.294162	-0.0171991	-0.598002	-0.0994085	-0.137774
1676				1	-0.145512	2.50874	-0.297755	-1.4046	1.74529	-0.341053	-2.0938	-0.485279	0.218812	-0.203723	-0.407533	0.0130636	-0.365284	-0.180513	-0.283222	0.0953908	-0.409961	-0.484819	-0.00450268	-0.355469	-0.212613	-0.126665	-0.0888031	-0.414654	-0.0488127	-0.145444	-0.228488	0.0173328	-0.540355	-0.00298443	-0.130529
1676				2	-0.0941697	3.12298	-0.370369	-0.137044	2.12877	-0.776515	-0.917072	-0.313219	0.171228	-0.0641815	-0.366721	-0.56189	-0.28643	-0.135515	-0.251179	-0.404823	-0.185286	0.360929	-0.0559651	-0.670117	-0.261975	-0.217857	-0.187459	-0.311212	-0.0981453	-0.224823	-0.170001	-0.272437	-0.324559	0.0818528	-0.0721642
1676				3	-0.155929	0.942252	-0.392382	0.511258	0.385416	-0.284796	0.12108	-0.115277	-0.29742	-0.093247	-0.555943	-0.426904	0.234748	-0.163069	-0.265723	-0.334042	0.0142766	-0.163901	-0.140732	-0.278252	-0.16353	-0.249436	-0.115859	-0.250115	-0.0386888	-0.269391	-0.186212	-0.221791	-0.518521	-0.0450581	-0.189474
1676				4	-0.321782	0.090132	-0.419351	-0.143772	0.0364587	-0.100082	-0.30446	-0.112222	-0.0113235	-0.0482815	-0.703142	-0.317741	-0.426533	-0.262048	-0.0646129	-0.308894	-0.378858	-2.16928	-0.221962	-0.277814	-0.433676	-0.332624	-0.0968506	-0.191777	-0.0494846	-0.222794	-0.281894	-0.255355	-0.354827	-0.292745	-0.163496
1676				5	-0.257665	-0.348572	-0.363096	-0.852447	-0.275386	-0.36468	-0.218779	-0.359638	-0.300435	-0.0206433	-0.298477	-0.32369	-0.333684	-0.239456	-0.226957	-0.595846	-0.327822	-1.20936	-0.120554	-0.115462	-0.429484	-0.31872	-0.15799	-0.195381	-0.0525144	0.0366143	-0.146054	-0.193384	-0.383379	-0.168565	-0.205453
1676				6	-0.18625	1.1155	-0.420958	-0.267729	0.0464167	-0.269209	-0.552624	-0.291484	-0.17534	-0.106147	0.120166	-0.27862	-0.0449005	-0.169425	-0.298667	-0.380377	-0.226051	0.0163615	-0.125883	-0.194914	-0.387598	-0.201306	-0.225879	-0.214377	-0.0744866	-0.160343	0.0383266	-0.158882	-0.439629	-0.0855421	-0.168451
1676				7	-0.232841	-0.265911	-0.473107	-0.453738	-0.14575	-0.397381	-0.653104	-0.535853	-0.00621039	-0.186394	-0.0526264	-0.036137	-0.205717	-0.0136867	-0.143169	0.0617807	-0.364606	-1.03887	-0.222601	-0.202771	-0.322321	-0.199499	-0.239884	-0.299712	-0.0470448	-0.0986907	0.134448	-0.164519	-0.344269	0.0636866	-0.176177
1676				8	-0.283757	-0.33302	-0.459059	-0.770302	-0.312081	-0.208916	-0.452679	-0.51125	-0.0068854	-0.0300043	-0.526393	-0.306866	-0.349593	-0.0702782	-0.180573	-0.351216	-0.272408	-1.07843	-0.409572	-0.258824	-0.284475	-0.134565	-0.177667	-0.175022	-0.102866	-0.315332	0.314137	-0.0743376	-0.308586	0.00176608	-0.165097
1676				9	-0.351141	-1.15744	-0.405088	-0.895883	-0.66676	-0.227188	-0.328811	-0.315732	-0.200557	-0.248875	-0.684018	-0.386928	-0.485322	-0.120574	-0.222127	-0.396238	-0.23746	-0.737282	-0.213559	-0.0260105	-0.296944	-0.196595	-0.184811	-0.132588	-0.0307378	-0.0846947	0.233055	-0.1151	-0.082093	-0.0466208	-0.121151
1676				10	-0.221209	-1.03487	-0.384733	-0.627666	-0.737867	-0.185381	-0.392169	0.426863	-0.457302	-0.494086	-0.892846	-0.38406	-0.859606	-0.168293	-0.329449	-0.341038	-0.409203	-0.386156	-0.393568	-0.282171	-0.359497	-0.297358	-0.152461	-0.0237769	0.0159245	-0.1483	0.151052	-0.195018	-0.259042	0.000994237	-0.181942
1676				11	-0.0883391	-1.53443	-0.439289	-0.0147137	-0.65074	-0.369761	-1.00492	-0.0628998	-0.00608711	-0.27721	-0.356934	-0.433662	-0.195559	-0.209416	-0.190605	-0.308493	-0.315446	-1.17125	-0.374798	-0.0130401	-0.587455	-0.219112	-0.236174	-0.322588	-0.218567	-0.378142	0.0239009	-0.00471662	-0.681509	-0.108377	-0.165756
1676				12	-0.342752	-3.90605	-0.377195	-0.233557	-2.36219	-0.266137	-1.00228	-0.452668	0.224251	-0.28266	-0.448463	-0.248131	-0.404577	-0.168866	-0.33579	-0.234199	-0.418443	-0.257964	-0.200875	-0.126246	-0.365958	-0.235422	-0.125694	-0.295553	-0.0934169	-0.35573	-0.161628	-0.0350938	-0.33395	-0.19107	-0.1766
1677				1	-0.0553234	0.0591335	-0.322764	-0.3846	0.184691	-0.631992	0.384513	-0.0487412	-0.115	-0.365234	-0.570649	-0.322882	-0.522659	-0.232049	-0.198366	-0.136809	-0.547012	-0.425583	-0.150922	-0.347983	-0.215514	-0.293394	-0.248801	-0.32684	-0.0300997	-0.167891	-0.0340246	-0.121419	-0.401276	-0.221208	-0.253112
1677				2	-0.0722963	-0.133335	-0.377888	-0.4073	-0.155257	-0.0262833	-0.174244	0.0455603	-0.312861	-0.327712	-0.545834	-0.620876	-0.509128	-0.222766	-0.173089	-0.408939	-0.561252	-0.419219	-0.153009	-0.530193	-0.304608	-0.242771	-0.276996	-0.290895	0.00995369	-0.0706177	-0.0478243	-0.204621	-0.25525	-0.205512	-0.144905
1677				3	-0.154651	1.41433	-0.473048	-0.693458	0.562404	-0.0611146	0.280598	-0.345968	-0.293676	-0.0594526	-0.0737451	-0.233153	0.576134	-0.238581	-0.112836	0.00351037	-0.0599383	-0.0513303	-0.211184	-0.321344	-0.253885	-0.282189	-0.313851	-0.404415	-0.0655118	-0.355032	-0.093667	-0.230734	-0.431612	-0.113494	-0.203916
1677				4	-0.311021	-0.707713	-0.493929	-0.947084	-0.50429	0.0544863	-0.213978	-0.174351	-0.320169	-0.0921352	0.600969	0.0107633	0.245243	-0.205789	-0.11848	-0.304177	-0.307815	-1.19863	-0.108043	-0.139486	-0.264292	-0.243478	-0.187171	-0.337142	-0.0519527	-0.278649	-0.17081	-0.270496	-0.539239	-0.13046	-0.199755
1677				5	-0.223428	-1.0082	-0.343997	-0.246472	-0.421977	-0.35047	-0.415577	-0.0412247	-0.111995	-0.123278	-0.135694	-0.192988	-0.244119	-0.181551	-0.201772	-0.285823	-0.37105	1.83374	-0.265591	-0.265901	-0.412406	-0.343918	-0.152749	-0.282932	-0.071689	-0.14159	-0.131398	-0.273677	-0.249638	-0.204892	-0.248085
1677				6	-0.258457	-1.25068	-0.350441	-0.36103	-0.55628	-0.239053	-0.541771	-0.654368	0.0876912	-0.0740538	-0.31655	-0.181745	-0.10955	-0.100721	-0.255349	-0.200698	-0.366922	2.79256	-0.171477	-0.162707	-0.288487	-0.238747	-0.18893	-0.210493	-0.0113067	-0.127963	-0.0404678	-0.0900686	-0.312317	0.0307356	-0.0754026
1677				7	-0.283916	-0.265314	-0.414304	-0.196983	-0.244212	-0.484716	-0.467033	-0.280802	0.0596923	-0.0241112	0.0677712	-0.0573944	-0.244074	-0.0592819	-0.247841	-0.0773556	-0.270322	-0.434661	-0.307485	-0.178505	-0.302303	-0.256378	-0.197733	-0.31465	0.00793648	-0.190081	0.0808325	-0.172137	-0.311216	0.101746	-0.244261
1677				8	-0.3742	-1.37216	-0.386833	-0.718894	-0.649619	-0.4903	-0.555449	0.0235739	-0.0333632	-0.0903109	-0.28106	-0.0278934	-0.308514	-0.182625	-0.159087	-0.0270171	-0.260025	-1.18667	-0.207185	-0.168563	-0.294914	-0.177557	-0.181171	-0.341703	-0.128485	-0.0369207	0.0571241	-0.138722	-0.256195	0.0798796	-0.196659
1677				9	-0.29934	0.0731323	-0.375656	-0.383392	0.0259175	-0.410108	-0.383953	-0.248516	-0.237926	-0.190657	-0.461572	-0.175491	-0.308944	-0.0741567	-0.224177	-0.153278	-0.28534	-0.627804	-0.0823329	-0.0555687	-0.356019	-0.162946	-0.168728	-0.289866	-0.0894422	-0.0793989	0.332643	-0.109952	0.0785305	0.290175	-0.141911
1677				10	-0.272087	-0.121263	-0.292091	-0.387338	-0.00448891	-0.404557	-0.618645	-0.41055	-0.426659	-0.379954	-0.856772	-0.380585	-0.75527	-0.176924	-0.176788	-0.386909	-0.392884	-0.558257	0.00426108	-0.317512	-0.212278	-0.139871	-0.160593	-0.125431	-0.0377121	-0.0276663	0.307895	-0.0256055	-0.22631	0.334883	-0.101396
1677				11	-0.436241	-1.09042	-0.381197	-0.619841	-0.953209	-0.38718	-0.175221	-0.375883	-0.493432	-0.257311	-0.208934	-0.272098	-0.27053	-0.150009	-0.243518	-0.220287	-0.289078	0.00276086	-0.155466	-0.128775	-0.374488	-0.158289	-0.246317	-0.243936	-0.162606	-0.255701	0.0688876	-0.0291765	-0.532509	0.0795044	-0.172859
1677				12	-0.0823095	-0.765273	-0.356367	-0.352005	-0.297165	-0.180326	-0.235463	-0.765697	-0.0896143	-0.522886	-0.577391	-0.138732	-0.429618	-0.161307	-0.445711	-0.068109	-0.526118	-1.22031	-0.15171	-0.183823	-0.495848	-0.312403	-0.259462	-0.48448	0.0120881	-0.188045	-0.478576	-0.00904134	-0.45447	-0.29512	-0.0987263
1678				1	0.0924026	0.796931	-0.180401	-1.17235	0.509535	-0.544339	0.0284232	-0.367228	0.0558999	-0.0905622	-0.0139145	-0.100697	0.142842	-0.122323	-0.373462	-0.0693497	-0.211532	-1.21399	-0.150192	-0.702222	-0.286582	-0.194288	-0.22491	-0.373746	-0.120172	-0.0132798	-0.367645	-0.0872872	-0.285701	-0.060943	-0.118518
1678				2	0.0650824	0.543113	-0.230188	-0.643329	-0.131393	-0.629839	-0.138671	-0.251069	-0.178952	-0.151746	-0.0537935	-0.034676	-0.0659144	-0.165071	-0.274064	-0.0156188	-0.201116	-1.58234	-0.200248	-0.363902	-0.242228	-0.220508	-0.234567	-0.347714	-0.244057	-0.483358	-0.199178	-0.102456	-0.156033	0.0425557	-0.167617
1678				3	-0.176494	-0.207614	-0.298697	-0.455322	-0.268231	0.00898906	-0.0800081	-0.220674	-0.185823	-0.00657902	-0.752458	-0.14382	-0.394327	-0.231127	-0.287215	0.202675	-0.279627	-0.679161	-0.149422	-0.559468	-0.361177	-0.131754	-0.254298	-0.282406	-0.0608827	-0.179899	0.0953036	0.000798988	-0.219759	0.0409709	-0.17905
1678				4	-0.17747	-0.557898	-0.203876	-0.544632	-0.213932	-0.251304	-0.421468	-0.19631	-0.317607	0.0790112	-0.0267127	-0.105219	-0.260269	-0.314109	-0.357591	-0.080242	-0.244375	-1.46881	-0.210582	-0.346102	-0.45922	-0.26572	-0.133723	-0.176497	-0.194615	-0.146514	-0.36209	-0.204776	-0.518355	-0.00417849	-0.227076
1678				5	-0.302638	-0.202618	-0.330402	-0.0270562	-0.240875	-0.148559	-0.414868	-0.533227	-0.373035	-0.0512162	-0.403486	-0.0430835	-0.422525	-0.245018	-0.061004	-0.181817	-0.179818	-0.339992	-0.396	-0.368961	-0.619576	-0.28776	-0.168117	-0.180241	-0.252519	-0.393564	-0.199735	-0.228042	-0.288279	-0.0889179	-0.166286
1678				6	-0.204567	-0.52592	-0.306931	-0.0518578	-0.238159	-0.316178	-0.311781	-0.194753	-0.364928	-0.16425	0.0938278	-0.0277269	-0.0943314	-0.174424	-0.0649344	-0.0453423	-0.344377	2.26973	-0.263776	-0.264677	-0.54632	-0.265439	-0.23475	-0.26158	-0.0343455	-0.154313	-0.133737	-0.128568	-0.112958	-0.0093359	-0.127458
1678				7	-0.219204	-0.0283357	-0.35852	-0.241879	-0.165311	-0.133483	-0.614938	-0.158257	-0.501282	-0.0345901	-0.166886	-0.249548	-0.220879	-0.135931	-0.0202769	-0.179971	-0.253827	-0.909039	-0.220807	-0.0849117	-0.339218	-0.279955	-0.226323	-0.350819	-0.0830631	-0.0897291	-0.0951375	-0.109777	-0.265845	-0.0445726	-0.173779
1678				8	-0.259195	0.164465	-0.385405	-0.48456	-0.0856631	0.0803015	-0.562823	-0.232622	-0.271704	-0.163446	0.0470383	-0.0718216	-0.161858	-0.181315	-0.0285063	-0.0470967	-0.279284	-1.31779	-0.534861	-0.271451	-0.505485	-0.148392	-0.177575	-0.273126	-0.271005	-0.204405	-0.0296889	-0.0563971	-0.166815	0.0655688	-0.0727467
1678				9	-0.242173	1.36128	-0.31102	-0.246486	0.565203	-0.20812	-0.357046	0.0471763	-0.349689	-0.289814	-0.016053	-0.285911	-0.20923	-0.266456	-0.150584	-0.353705	-0.354163	-0.246608	-0.434269	-0.255312	-0.548285	-0.213777	-0.213902	-0.146331	-0.106908	-0.0650128	0.0723738	-0.0638534	-0.226247	0.161652	-0.181065
1678				10	-0.310219	-0.526902	-0.28399	-0.854747	-0.448897	-0.299194	-0.207263	-0.0340155	-0.544205	-0.385794	-1.01575	-0.309186	-0.874297	-0.208799	-0.171585	-0.209633	-0.477356	-0.390056	-0.0885372	0.0692806	-0.473038	-0.200482	-0.212081	-0.0616016	-0.0715752	0.0445125	-0.0835409	-0.058328	-0.225935	-0.122552	-0.126236
1678				11	-0.143416	0.10241	-0.283049	0.164969	0.395052	-0.501492	-0.436251	-0.125124	-0.623513	-0.333878	0.103453	0.0738911	0.0697819	-0.216994	-0.125635	0.037674	-0.288603	-0.168327	-0.120847	-0.167793	-0.411124	-0.302976	-0.252491	-0.256281	-0.0222835	-0.0434261	-0.120623	-0.102615	-0.155586	-0.204572	-0.156448
1678				12	-0.211599	-1.7561	-0.382986	-0.960386	-1.39415	-0.0921732	-0.105044	-0.637333	-0.367082	-0.293949	-0.129812	-0.0350265	0.10873	-0.253833	-0.370048	-0.0883951	-0.309861	-0.758888	-0.356519	-0.343766	-0.378852	-0.279036	-0.330183	-0.278801	-0.00295518	-0.132694	-0.270744	-0.0854116	-0.546948	-0.287235	-0.166489
1679				1	-0.0393074	-3.18701	-0.270775	-0.307794	-1.90316	0.136607	0.198887	-0.477331	-0.272595	-0.321985	-0.407455	-0.216851	-0.382204	-0.105754	-0.302265	-0.106097	-0.45298	-0.85173	-0.195897	-0.633825	-0.124486	-0.185068	-0.192351	-0.21556	-0.0131549	0.0209247	-0.207902	-0.104726	-0.60571	-0.0991644	-0.141454
1679				2	-0.160618	-2.40561	-0.207317	-0.539429	-1.55706	-0.17688	-0.370779	-0.399829	-0.471564	-0.126571	-0.372566	-0.2198	-0.190174	-0.152875	-0.266022	-0.00885434	-0.371582	-0.74363	-0.346025	-0.432543	-0.0364366	-0.105877	-0.202519	-0.223296	-0.286185	-0.542488	-0.0430445	0.0216079	-0.398759	-0.204631	-0.0791356
1679				3	-0.12728	-1.06063	-0.258568	-1.29643	-0.752219	0.0892453	-0.0373789	-0.390898	-0.203544	-0.0490099	-1.0247	-0.279081	-0.908438	-0.200047	-0.352647	0.12705	-0.532783	-0.685982	-0.27637	0.0366621	-0.159473	-0.100466	-0.191323	-0.27574	-0.157025	-0.189603	-0.0403928	-0.0285723	-0.347182	0.0123378	-0.0545595
1679				4	-0.374614	-1.14098	-0.287634	-0.74332	-0.721642	0.00948884	-0.215475	-0.0897888	-0.0297924	0.0785019	0.0969493	-0.00131423	0.0526719	-0.286569	-0.220184	0.0735572	-0.0963038	-0.229496	-0.111084	0.0580583	-0.428654	-0.281688	-0.19766	-0.373624	-0.224799	-0.112096	-0.216872	-0.27184	-0.0644789	0.00537351	-0.210499
1679				5	-0.296559	0.39209	-0.343536	-0.223686	0.0550588	-0.140643	-0.365626	-0.194447	-0.0322867	-0.0543366	-0.327581	-0.227964	-0.305148	-0.21216	-0.0678933	-0.200582	-0.221873	0.90258	0.0158063	-0.161188	-0.540181	-0.321333	-0.173156	-0.39457	-0.188708	-0.000990073	-0.431149	-0.288417	-0.476881	-0.142102	-0.216619
1679				6	-0.240539	-0.15711	-0.374781	-0.163605	-0.27619	-0.267823	-0.268175	-0.237586	0.0378007	-0.0803824	-0.367447	-0.0614489	-0.252428	-0.121181	0.0166105	0.00721089	-0.344839	1.13027	-0.367947	-0.223645	-0.311642	-0.157584	-0.216115	-0.256737	-0.209728	-0.227513	-0.271436	-0.134235	-0.319106	-0.200717	-0.119596
1679				7	-0.257147	-0.679899	-0.314752	-0.290264	-0.277999	-0.208972	-0.472461	-0.274718	0.0100955	-0.0592751	-0.161406	-0.240775	-0.104483	-0.130121	-0.0175418	-0.203482	-0.284459	0.818311	-0.196049	-0.113322	-0.18889	-0.0199833	-0.173064	0.0258515	-0.195981	-0.101527	-0.146022	0.0076093	-0.0957435	-0.0472047	-0.0696018
1679				8	-0.175479	-0.0513614	-0.347887	-0.0856872	-0.0316556	-0.52527	-0.57865	-0.372188	-0.140604	-0.10804	-0.479752	-0.242653	-0.319113	-0.198862	-0.287366	-0.0528827	-0.26211	0.988339	-0.300995	-0.0352848	-0.322055	-0.107527	-0.179397	-0.22653	-0.270295	-0.268057	-0.053691	-0.0844236	-0.0350788	0.123558	-0.0492023
1679				9	-0.302254	-0.509983	-0.305092	-0.196789	-0.274225	-0.28501	-0.335132	-0.130425	-0.280681	-0.15103	-0.302665	-0.218988	-0.238223	-0.0359372	-0.106519	-0.0415692	-0.234134	-0.053614	-0.324003	0.00119397	-0.569272	-0.12375	-0.190454	-0.220606	-0.0747766	-0.140191	0.0668844	-0.0977622	-0.174754	0.0379777	-0.050808
1679				10	-0.213089	0.43023	-0.215831	-0.481143	0.0443468	-0.0745843	-0.0973937	0.579173	-0.422623	-0.331067	-1.1736	-0.390655	-0.890862	-0.059063	-0.201443	-0.325062	-0.372023	-0.188032	-0.18383	-0.140725	-0.469795	-0.0809621	-0.143054	-0.187656	-0.064435	-0.0117791	0.205785	0.0270926	-0.319442	0.223881	-0.179081
1679				11	-0.136149	-1.23327	-0.322325	-0.355837	-0.263064	-0.358306	-0.970749	0.255235	-0.490369	-0.206169	0.0398713	-0.189856	-0.305232	-0.166268	-0.154363	-0.0674243	-0.416691	-0.621064	-0.410738	-0.163096	-0.232575	-0.102331	-0.267205	-0.155214	-0.209704	-0.13265	0.20602	-0.0759637	-0.300924	0.113917	-0.110058
1679				12	-0.0468481	-0.124536	-0.149397	-0.605393	-0.028146	-0.390079	-0.586601	-0.194808	-0.282201	-0.359585	-0.538385	-0.126393	-0.469889	-0.214394	-0.265022	0.0451131	-0.484336	-0.758628	-0.312697	-0.450924	-0.114331	-0.10161	-0.282394	-0.355766	-0.245023	-0.415884	-0.0726316	0.0243125	-0.393911	-0.224397	-0.0771751
1680				1	-0.0520676	1.22789	-0.215859	-0.297654	0.615905	-0.220325	0.542621	-0.42145	0.0849222	-0.38183	-0.147955	0.122885	-0.150594	-0.243774	-0.182434	0.288542	-0.446988	-0.17676	-0.148029	-0.348492	-0.150031	-0.151672	-0.2613	-0.26295	-0.0976504	-0.310001	-0.138154	-0.122907	-0.149373	-0.147836	-0.123452
1680				2	0.0384577	1.38415	-0.115437	-0.268598	0.654849	-0.328046	0.872161	0.365695	0.380699	-0.123681	-0.220914	0.222128	-0.349487	-0.211414	-0.332631	0.358065	-0.530049	-0.636494	-0.116851	-0.551544	-0.211899	-0.0505102	-0.220437	-0.279628	-0.0821178	-0.524681	0.0378576	-0.0462937	-0.316523	0.0653409	-0.0997101
1680				3	-0.218413	1.27624	-0.234974	-0.41683	0.534384	-0.121578	-0.0245548	0.33075	0.20189	-0.100604	-0.980744	-0.545478	-0.417663	-0.209725	-0.236589	-0.145239	-0.418333	0.109235	-0.179042	-0.227673	-0.297805	-0.128397	-0.2156	-0.17272	-0.120905	-0.0869261	-0.0405206	-0.0741579	-0.249962	0.00193704	-0.132164
1680				4	-0.0296394	-0.833909	-0.400308	-0.262686	-0.463362	-0.256218	-0.143469	-0.00227562	-0.12396	-0.131875	-0.731368	-0.302183	-0.520504	-0.160987	-0.0714813	-0.00433347	-0.387302	-0.313267	-0.351667	-0.0734305	-0.349858	-0.211377	-0.254592	-0.344451	-0.108176	-0.0400008	-0.0666437	-0.196975	-0.383151	-0.0978636	-0.114033
1680				5	-0.248902	-0.127257	-0.282325	-0.101357	-0.170429	-0.225324	-0.285456	-0.0847344	-0.0971499	-0.0658513	-0.405591	-0.422335	-0.34366	-0.0420554	-0.234903	-0.588533	-0.266671	0.985886	-0.250585	-0.302412	-0.399743	-0.264813	-0.168185	-0.349598	-0.0704759	-0.0534755	-0.227267	-0.178304	-0.377062	-0.207917	-0.178384
1680				6	-0.126835	-1.14569	-0.254355	-1.01425	-0.558494	-0.197775	-0.165676	0.154819	0.264027	-0.115913	0.336826	0.170455	-0.159868	0.0356682	-0.446259	0.221972	-0.300573	0.282824	-0.297485	-0.0620227	-0.312502	-0.209042	-0.115119	-0.11232	-0.104859	-0.227454	-0.0250813	-0.146499	-0.225966	-0.134374	-0.174638
1680				7	-0.203277	0.0571783	-0.246085	-0.333934	-0.142931	-0.326013	-0.21882	0.034545	0.119175	-0.14555	0.0373757	-0.20533	-0.119847	-0.103538	-0.264898	-0.130379	-0.256067	0.397016	-0.24327	-0.124192	-0.377189	-0.161846	-0.18689	-0.233792	-0.191216	-0.117914	0.164506	-0.0867587	-0.111639	0.0230811	-0.145743
1680				8	-0.177602	-0.481737	-0.280989	-0.603688	-0.239609	-0.192469	-0.323395	-0.0880735	0.147179	-0.11183	-0.340266	-0.271815	-0.186633	-0.197254	-0.22066	-0.229599	-0.274149	1.79925	-0.217371	0.0034639	-0.413463	-0.0841084	-0.145021	-0.00965672	-0.263838	-0.0350062	0.19208	-0.0185457	-0.115547	0.154608	-0.0548233
1680				9	-0.258271	1.51626	-0.27895	-0.0267031	0.611902	-0.316297	-0.141504	-0.279902	-0.207336	-0.187511	-0.286889	-0.111583	-0.365203	-0.169639	-0.150495	-0.195081	-0.261008	0.896916	-0.0710023	-0.0788222	-0.328421	-0.112714	-0.225662	0.0142358	-0.174517	-0.111473	0.28128	0.00832259	0.139985	0.255086	-0.0966798
1680				10	-0.181635	0.970129	-0.211074	-0.294024	0.380964	-0.229401	0.0893129	0.263413	-0.314579	-0.25915	-1.13483	-0.62404	-1.09024	-0.107723	-0.219999	-0.532271	-0.400336	-0.450063	-0.0231132	0.0412149	-0.400976	-0.161668	-0.140974	-0.0656909	-0.100008	-0.0393631	0.0912371	-0.0376867	-0.0536304	0.0741334	-0.131439
1680				11	-0.0782263	0.964492	-0.314003	-0.696509	0.601362	-0.269923	-0.0551305	0.447347	-0.1797	-0.324856	-0.355405	-0.363375	-0.287748	-0.0738356	-0.198699	-0.412612	-0.332163	-0.565421	-0.294422	-0.17547	-0.382386	-0.120538	-0.185955	-0.319603	-0.160315	-0.0733438	0.0177078	-0.0413701	-0.464861	0.0394444	-0.0735586
1680				12	-0.105226	-1.85996	-0.304207	-0.761567	-0.576501	-0.309777	-1.16591	-0.163809	-0.250959	-0.335449	-0.0808189	0.0198935	-0.292001	-0.171986	-0.315317	0.047122	-0.387132	-0.498591	-0.154525	0.0820876	-0.302525	-0.167851	-0.177543	-0.275106	-0.114201	-0.10707	-0.221613	-0.0383249	-0.332531	-0.0600599	-0.177166
1681				1	0.0984547	-2.72913	-0.196171	0.0261352	-1.34199	0.0712555	-1.1176	-0.203937	-0.416308	-0.144088	-0.301596	-0.359552	-0.0305061	-0.087249	-0.227747	-0.224328	-0.205416	-0.509197	0.089337	-0.0167209	-0.165543	0.00889219	-0.189084	-0.213812	-0.0625933	0.058344	-0.0389207	0.0812824	-0.0745285	-0.131591	-0.0813801
1681				2	-0.145325	-2.36324	-0.198717	-0.369346	-1.38211	0.346752	-0.0850881	-0.562448	-0.278899	-0.223048	-0.648934	-0.478599	-0.455641	-0.126695	-0.26858	-0.277814	-0.346859	0.0274968	-0.287193	-0.785264	-0.175166	-0.219404	-0.236485	-0.257152	-0.17207	-0.38333	0.00331745	-0.0593743	-0.0925414	-0.261985	-0.198959
1681				3	-0.309169	-0.200131	-0.306109	-0.819559	-0.109279	-0.00367741	-0.0533596	-0.173301	-0.144014	0.00211468	-0.961375	-0.460489	-0.470573	-0.148758	-0.413062	-0.0681306	-0.223762	0.110022	-0.251443	-0.314707	-0.0645306	0.0194146	-0.148638	-0.193905	-0.20862	-0.256718	0.116218	0.0663145	-0.212214	0.0389224	-0.0682199
1681				4	-0.252338	0.390889	-0.399147	-0.563663	0.0123003	0.0148979	-0.187892	-0.602114	0.209982	0.0939266	-0.544908	-0.13464	-0.303882	-0.199561	-0.184713	-0.141254	-0.246075	1.75295	-0.119262	-0.171357	-0.374398	-0.274156	-0.246778	-0.220742	-0.124411	-0.245295	0.0061903	-0.244108	-0.29127	0.0770173	-0.162638
1681				5	-0.238335	-0.336619	-0.296739	-0.452684	-0.0978953	-0.213991	-0.0876561	0.0314141	-0.460132	0.0477733	-0.534759	-0.207241	-0.372815	-0.182431	-0.24364	-0.18695	-0.149611	2.49768	-0.107878	-0.197803	-0.513566	-0.328322	-0.161673	-0.201769	0.026261	-0.0801183	-0.23161	-0.112636	-0.382294	-0.0909549	-0.156747
1681				6	-0.228384	-0.433837	-0.311984	-0.170184	-0.215105	-0.130981	-0.363403	-0.521513	-0.256379	-0.056798	-0.48539	-0.165592	-0.424913	-0.10937	-0.185822	0.0337707	-0.215728	-0.730243	-0.366191	-0.311225	-0.279436	-0.209433	-0.125882	-0.148895	-0.158671	-0.204043	-0.145424	-0.0822007	-0.24646	-0.0643991	-0.132364
1681				7	-0.212225	-0.77775	-0.319877	-0.344975	-0.378751	-0.13692	-0.252776	-0.285458	0.0233363	-0.0863003	0.0294449	0.309963	-0.110934	-0.186298	-0.117443	0.418959	-0.220825	-0.673844	-0.19314	-0.190631	-0.271282	-0.169086	-0.180546	-0.181414	-0.200731	-0.0661785	0.069419	-0.0753279	-0.223938	-0.0312021	-0.113459
1681				8	-0.243268	0.746568	-0.270693	-0.327812	0.195678	-0.409007	-0.21578	-0.0710311	-0.0467585	-0.0740202	-0.26463	-0.266722	-0.257563	-0.107826	-0.0554113	-0.403	-0.21926	-0.967769	-0.263637	-0.244075	-0.211429	-0.146982	-0.177005	-0.0574244	-0.151095	-0.230687	0.0930681	-0.0467478	-0.139039	0.144132	-0.0615639
1681				9	-0.225964	0.707937	-0.273493	-0.450526	0.214809	-0.275472	-0.187107	-0.0469373	-0.153453	-0.223188	-0.0480431	-0.261176	-0.219428	-0.174336	-0.179063	-0.372362	-0.272223	-0.631544	-0.134633	-0.0571537	-0.51859	-0.217458	-0.189659	-0.1214	-0.105373	-0.175524	0.0683187	-0.0938217	-0.0479115	-0.00248095	-0.113237
1681				10	-0.216744	0.943594	-0.375062	-0.337024	0.494339	-0.143774	-0.028155	0.546068	-0.196747	-0.487221	-1.06591	-0.558733	-0.943764	-0.1444	-0.255449	-0.366417	-0.545801	0.0247846	-0.124548	-0.0440884	-0.561106	-0.308846	-0.0978713	-0.0415592	-0.041894	-0.038296	-0.10888	-0.17749	-0.117775	0.0805993	-0.167421
1681				11	-0.215739	1.20368	-0.418385	-0.575911	0.417235	-0.308565	-0.196669	0.44694	-0.610717	-0.297073	-0.14233	-0.317593	-0.108909	-0.124539	-0.15048	-0.22297	-0.408042	-0.270173	-0.2215	-0.393222	-0.312052	-0.229242	-0.147482	0.0627557	-0.116854	-0.208599	-0.134689	-0.178438	-0.498245	-0.173952	-0.151451
1681				12	-0.160759	2.37059	-0.302736	-0.278905	1.00903	-0.0986361	0.460733	-0.522386	-0.123668	-0.355639	-0.436316	-0.29702	-0.262451	-0.129897	-0.30713	-0.102504	-0.388932	-0.306927	-0.237517	-0.0686606	-0.23882	-0.126839	-0.210029	-0.171221	-0.116732	-0.190871	-0.195154	0.0272612	-0.400688	-0.021726	-0.130323
1682				1	-0.0124176	3.03932	-0.290356	-0.804151	1.15866	-0.10259	0.15024	-0.873415	-0.0146338	-0.299861	-0.445315	-0.282137	-0.529531	-0.126012	-0.222692	0.149324	-0.52515	-0.405631	-0.0410456	-0.186314	-0.051877	-0.122269	-0.103301	-0.128611	-0.0167559	-0.193495	0.0726287	-0.0660279	-0.302672	0.0651747	-0.0686886
1682				2	-0.099722	-0.118992	-0.175791	-0.444206	-0.356613	-0.200426	0.758205	-0.341837	-0.09335	-0.184346	-0.573313	-0.397608	-0.309965	-0.0889542	-0.265773	-0.084742	-0.225721	-0.147624	-0.203199	-0.418072	-0.146042	-0.117603	-0.188769	-0.0913973	-0.249547	-0.63321	-0.0662683	-0.152054	-0.159695	-0.0575286	-0.0951287
1682				3	-0.152583	0.305033	-0.364111	-1.00823	0.0737327	-0.174169	-0.0177332	-0.276505	-0.271226	-0.0264002	-0.675561	-0.442974	-0.11685	-0.16368	-0.280481	-0.106194	-0.0565356	0.0201748	-0.033816	-0.233194	-0.2439	-0.185767	-0.155448	-0.180567	-0.0562745	-0.173902	-0.18209	-0.0314905	-0.314825	-0.151872	-0.147472
1682				4	-0.0896179	-0.843889	-0.221786	-0.432294	-0.552479	-0.0171421	-0.0292597	-0.472041	-0.307779	0.0504677	-0.136153	-0.259052	-0.0668778	-0.18061	-0.209577	-0.292666	-0.0561961	0.427	-0.140142	-0.20401	-0.108742	-0.110397	-0.233194	-0.297307	-0.1831	-0.252783	-0.182542	-0.135618	-0.463822	-0.214483	-0.222237
1682				5	-0.26167	0.384577	-0.220035	0.249821	-0.110029	-0.27655	-0.133408	-0.390509	-0.253867	-0.0660649	-0.517608	-0.340951	-0.286012	-0.206707	-0.13854	-0.648932	-0.0883183	1.10498	-0.17873	-0.264083	-0.243686	-0.200016	-0.165219	-0.0731508	-0.119554	-0.199011	-0.318526	-0.174272	-0.480219	-0.122686	-0.0998073
1682				6	-0.21809	-0.741261	-0.352921	-0.271079	-0.340357	-0.209372	-0.380962	-0.286122	-0.28745	-0.0410243	-0.711432	-0.294923	-0.2784	-0.117278	-0.0680892	-0.423181	-0.168909	0.819138	-0.437261	-0.398463	-0.107853	-0.158459	-0.228711	-0.173742	-0.130345	-0.296417	-0.157354	-0.108684	-0.241584	-0.0238089	-0.153497
1682				7	-0.143583	-1.48276	-0.279723	-0.0733996	-0.480098	-0.246511	-0.583175	-0.170349	-0.413073	-0.068417	-1.01061	-0.452525	-0.430575	-0.140081	-0.248806	-0.570234	-0.125427	-0.0842313	-0.323882	-0.168454	-0.069906	-0.130453	-0.181952	-0.301459	-0.25666	-0.220583	-0.0844755	-0.0510245	-0.216461	0.0178626	-0.186768
1682				8	-0.18254	-1.40458	-0.238926	-0.484696	-0.608601	-0.0580099	-0.239237	-0.259981	-0.0307501	-0.111906	0.0189125	-0.161698	-0.139174	-0.135099	-0.195006	-0.440508	-0.159825	0.755309	-0.234153	-0.152727	-0.163402	-0.0385895	-0.155179	-0.200136	-0.0935238	-0.00891083	0.0387658	0.0380625	-0.194959	0.133831	-0.00657883
1682				9	-0.152668	-0.204499	-0.256077	-0.238781	-0.065021	-0.162492	-0.25889	-0.151136	-0.0200801	-0.19079	-0.29061	-0.138122	-0.22021	-0.0978841	-0.131905	-0.210165	-0.182126	0.275881	-0.266688	-0.224333	-0.282916	-0.173358	-0.178789	-0.242877	-0.0741738	-0.0795792	-0.00197659	-0.118934	0.048732	0.0422407	-0.175289
1682				10	-0.116455	0.620304	-0.217618	-0.0735435	0.265046	-0.118027	-0.293339	-0.297443	-0.123269	-0.343516	-0.91697	-0.422788	-0.749608	-0.203413	-0.322235	-0.365726	-0.325129	-0.682785	-0.147879	-0.169006	-0.587326	-0.261134	-0.134883	-0.244146	0.0156393	-0.0110771	-0.133723	-0.0710328	-0.311514	-0.076179	-0.158989
1682				11	-0.0621112	0.625803	-0.307247	-0.181865	0.190538	-0.422316	0.049211	0.11747	-0.29832	-0.274061	-0.138176	-0.176848	-0.0671962	-0.167896	-0.37104	-0.106184	-0.258031	-0.689499	-0.228439	-0.0708547	-0.565972	-0.340429	-0.135165	-0.271223	-0.158088	-0.286274	-0.260113	-0.0659501	-0.360876	-0.254058	-0.0921762
1682				12	-0.153419	2.56591	-0.28512	-0.404029	1.66965	-0.16179	-0.100869	-0.0699503	-0.6319	-0.345844	-0.301902	-0.196977	0.135364	-0.0700157	-0.364187	-0.230413	-0.144959	-0.321358	-0.0277377	-0.280213	-0.428929	-0.248165	-0.053268	-0.264444	0.0834344	-0.0796767	-0.318453	-0.046721	-0.316185	-0.087892	-0.106932
1683				1	0.128343	1.10983	-0.162663	-0.20811	0.751254	-0.539859	-0.0970622	-0.242471	-0.55305	-0.415771	-0.613865	-0.534923	-0.409074	-0.0528938	-0.251104	-0.389142	-0.381646	-0.74325	0.216454	-0.524026	-0.273902	-0.0402678	-0.10175	-0.28101	0.141997	-0.0510958	-0.343526	0.0513885	-0.289281	-0.0667013	-0.0844166
1683				2	-0.0277044	0.0129965	-0.245485	-0.534471	-0.0786791	-0.227522	-0.555052	0.0267315	-0.848862	-0.421588	-0.399711	-0.425636	-0.515577	-0.114679	-0.301701	-0.318434	-0.496181	-0.654918	-0.147661	-0.590423	0.177392	-0.0625055	-0.0976705	-0.200933	-0.121621	-0.471985	0.0291563	-0.0482201	-0.357981	-0.0355445	-0.0749184
1683				3	-0.0805141	1.09757	-0.347607	0.199644	0.724305	-0.498367	-0.794636	-0.343937	-0.870595	-0.153058	-0.957939	-0.493916	-0.318713	-0.132523	-0.335792	-0.111812	-0.15572	-0.228838	-0.0215041	-0.232685	-0.0533078	-0.173596	-0.258053	-0.315598	-0.0284978	-0.171367	-0.00248235	-0.0116274	-0.367272	-0.0999116	-0.162531
1683				4	-0.147393	1.01289	-0.360265	0.117514	0.589096	0.0795986	-0.309164	-0.0907168	-0.40113	-0.0535172	-0.349862	-0.238464	-0.104814	-0.169231	-0.417282	-0.282842	-0.118185	0.268557	-0.0972782	-0.171337	-0.164685	-0.145313	-0.234433	-0.414008	0.0138622	-0.0016297	-0.0276957	-0.133941	-0.23496	-0.172187	-0.159109
1683				5	-0.349355	0.260923	-0.298883	-0.00318268	-0.110146	-0.101359	-0.10565	-0.461776	-0.261613	-0.170363	-0.129837	-0.0643733	-0.169217	-0.141562	-0.288276	-0.140436	-0.300194	0.514265	-0.154051	-0.22225	-0.323007	-0.218859	-0.101081	-0.237864	-0.0447067	-0.272885	-0.336001	-0.196481	-0.358728	-0.277343	-0.142654
1683				6	-0.174404	0.829945	-0.315897	0.17636	-0.0768944	-0.0158367	-0.196957	-0.454975	-0.461585	-0.176276	-0.148549	-0.315359	-0.174224	-0.14504	0.0700677	-0.267386	-0.260307	0.419401	-0.0853512	-0.115898	-0.227599	-0.159606	-0.16723	-0.418635	0.00222979	-0.0615782	-0.25576	-0.106052	-0.301303	-0.104942	-0.077598
1683				7	-0.157955	-0.539641	-0.291623	0.00447076	-0.361293	-0.237154	-0.101915	-0.578799	-0.513168	-0.0815548	-0.0184467	-0.0428127	-0.0423816	-0.215715	0.173525	-0.198087	-0.199668	-0.563702	-0.259774	-0.215851	-0.170219	-0.138479	-0.160376	-0.374558	-0.119456	-0.0971606	-0.0549955	-0.0650817	-0.112441	-0.193466	-0.0436714
1683				8	-0.209323	-2.00408	-0.239613	-0.781275	-0.894612	-0.451593	-0.202002	-0.2915	-0.414636	-0.176702	-0.0903786	-0.320139	-0.0548767	-0.199539	-0.145545	-0.288481	-0.231409	-0.298906	-0.156114	-0.0346735	-0.538524	-0.169794	-0.117551	-0.348888	-0.110055	-0.0810453	-0.135339	-0.127934	-0.0774344	-0.320381	-0.191685
1683				9	-0.0824951	0.293114	-0.28088	-0.241088	0.120535	-0.246645	-0.385956	-0.167473	-0.244083	-0.22336	0.509761	-0.14351	0.2746	-0.0311403	-0.104669	-0.158477	-0.182939	-0.691274	-0.106644	0.00355622	-0.536206	-0.132482	-0.083931	-0.145487	-0.0269021	-0.0125235	-0.060784	-0.0592338	-0.253262	-0.263608	-0.101055
1683				10	-0.109892	-1.19838	-0.212863	-0.294988	-0.69233	-0.0333212	-0.296267	-0.233012	-0.376332	-0.165728	-0.917214	-0.417926	-0.665387	-0.0979996	-0.187117	-0.322065	-0.265135	-0.196493	-0.214508	-0.268524	-0.385935	-0.0749272	-0.0768256	-0.128576	0.0127544	-0.0349133	-0.206185	-0.0409253	0.0154213	0.0637842	-0.0798968
1683				11	-0.165507	-0.416738	-0.28261	0.0502489	-0.156796	-0.369392	-0.454636	0.370882	-0.330018	-0.279875	-0.0822858	-0.258605	-0.135982	-0.0938704	-0.0944075	-0.293144	-0.21192	-0.741809	-0.108406	0.0312514	-0.599744	-0.128585	-0.086697	-0.256481	-0.0631236	-0.139272	-0.340246	0.0298293	-0.112543	-0.168371	-0.0989263
1683				12	-0.227754	-2.47125	-0.252848	-0.861638	-1.91047	0.0463095	1.21698	-0.479119	-0.172971	-0.217226	-0.212457	-0.185941	-0.0807812	-0.0840309	-0.153778	-0.235685	-0.0906342	0.208401	-0.253676	0.0692664	-0.436137	-0.0779439	-0.268047	-0.279547	-0.00365136	-0.130193	-0.474991	0.0144019	-0.385679	-0.139755	-0.0880203
1684				1	0.126603	-5.52432	-0.134417	-0.312001	-3.07976	-0.172893	-0.365336	0.141503	-0.263676	-0.165353	-0.0959657	-0.122008	0.0844274	-0.109035	-0.15323	-0.0873933	-0.0595605	-1.27825	-0.0218386	-0.247386	-0.0181741	-0.00172984	-0.130593	-0.215798	-0.143911	-0.269251	-0.417592	0.0247199	-0.178618	-0.107894	-0.0513623
1684				2	0.0385379	-3.46679	-0.154598	-0.32944	-2.18907	-0.119642	-0.425099	-0.211964	0.0108351	-0.174827	-0.244819	-0.0123734	-0.0868394	-0.136926	-0.177708	-0.153266	-0.203844	-0.626132	0.0178417	-0.211385	-0.0677076	-0.0975607	-0.0880632	-0.181859	-0.0590084	-0.234326	-0.22582	-0.00742575	0.149335	0.0186014	-0.0457875
1684				3	-0.149701	-1.22339	-0.155562	-0.778284	-0.623962	0.226383	-0.0774418	-0.172585	0.0845517	0.00937977	-1.5266	-0.357896	-1.13038	-0.0900998	-0.170873	-0.357734	-0.402567	-0.432746	-0.218135	-0.343587	-0.123782	-0.0774158	-0.0767809	-0.0992282	-0.0699502	-0.169204	-0.113376	-0.0274164	-0.260721	0.0853931	-0.0752886
1684				4	-0.0774947	-0.293999	-0.155321	-0.556252	-0.222117	0.116288	0.0137786	-0.301151	0.113911	0.0437061	-1.04883	-0.0329972	-0.488997	-0.197706	-0.123409	0.282689	-0.225942	-0.894114	0.00805702	-0.182026	-0.258887	-0.195176	-0.113048	-0.115964	0.068565	-0.1191	-0.356828	-0.156867	-0.158282	-0.219024	-0.122152
1684				5	-0.107039	1.88997	-0.32035	0.463639	0.570261	-0.18501	0.00468051	-0.10574	0.0524091	-0.0373479	-0.322999	-0.124179	-0.105653	-0.0819495	-0.145986	-0.0834057	-0.0990337	-0.686766	-0.12537	-0.217627	-0.126597	-0.117644	-0.107793	-0.180851	-0.00619348	-0.0418398	-0.176364	-0.142944	-0.298029	-0.25065	-0.151054
1684				6	-0.13109	1.02235	-0.322989	-0.210821	0.0227312	-0.0485844	-0.165415	-0.261882	0.0708512	-0.129867	0.0576053	0.193647	0.0346664	-0.164901	-0.0467822	0.297392	-0.145187	-1.27478	-0.222083	-0.286494	-0.22242	-0.175355	-0.123117	-0.115425	0.0378686	-0.0387119	-0.281534	-0.104751	-0.343327	-0.244558	-0.163953
1684				7	-0.0976693	0.114195	-0.214994	0.0503425	-0.208638	0.0652929	-0.151334	-0.464314	0.0577773	-0.0893692	0.1417	0.577076	0.131025	-0.188591	0.0191175	0.507752	-0.223768	-0.841708	-0.313874	-0.234805	-0.237083	-0.0655537	-0.107403	-0.13832	-0.124309	-0.0473335	-0.318093	-0.0155745	-0.0478605	-0.108558	-0.00151323
1684				8	-0.213628	0.0162427	-0.2843	-0.0865169	-0.0649541	0.0808556	-0.141588	0.136132	-0.00637042	-0.0765837	-0.11461	0.0457207	-0.0608257	-0.192692	-0.0964479	0.206828	-0.258238	0.856248	-0.222455	-0.134108	-0.30961	-0.100969	-0.11583	-0.265333	-0.0963552	0.0724133	-0.241891	-0.0276972	-0.0862912	-0.123827	0.0515381
1684				9	-0.16194	-0.415928	-0.228691	-0.745407	-0.266231	0.0102631	-0.219467	0.0330216	-0.0715632	-0.214958	0.206239	-0.0177969	-0.203227	-0.133338	-0.107871	-0.050219	-0.230411	-0.25558	-0.197307	-0.133284	-0.801268	-0.153407	-0.0989609	-0.320897	-0.0543765	-0.181826	-0.277821	-0.102388	-0.0213535	0.0121351	-0.19268
1684				10	-0.173973	1.14296	-0.202049	-0.15254	0.533104	-0.0421269	-0.0168902	-0.241423	-0.164463	-0.236447	-0.884708	-0.432254	-0.839861	-0.0685539	-0.179907	-0.376191	-0.169268	-0.416993	-0.283237	-0.261928	-0.561388	-0.135926	-0.0992388	-0.0660304	-0.0224991	-0.18169	-0.320556	-0.0365575	-0.0803543	-0.119693	-0.0797404
1684				11	-0.0806372	-2.18343	-0.319597	-1.05905	-1.45738	-0.0958004	-0.409552	-0.249132	-0.37663	-0.364746	-0.495607	-0.263774	-0.486007	-0.0931322	-0.208881	-0.176891	-0.306805	-0.382813	-0.0466706	-0.073011	-0.3245	-0.168344	-0.182848	-0.366583	0.142159	0.0357756	-0.416298	0.0234034	-0.374256	-0.296114	-0.0208185
1684				12	-0.062866	-1.64766	-0.182371	-0.0452437	-0.986845	0.197831	-1.39951	-0.448387	0.169119	-0.179279	-0.506752	-0.384591	-0.248173	-0.0945175	-0.386489	-0.225429	-0.0950554	0.330672	-0.345042	-0.23377	-0.267134	-0.262068	-0.101738	-0.448854	0.0302689	-0.114624	-0.359663	0.0235572	-0.409895	-0.258003	-0.0631828
1685				1	0.025201	-2.96364	-0.192048	0.627446	-1.34113	-0.419607	-0.804242	-0.0124992	0.148467	-0.0842337	-0.0766232	0.0135185	0.0807095	-0.121286	-0.297737	0.147264	-0.262201	0.493803	-0.404991	-0.777128	-0.110272	-0.0552634	-0.0898216	-0.179127	-0.0349635	-0.24792	-0.247823	-0.0403168	-0.461636	-0.164134	-0.0181477
1685				2	-0.0469476	-0.453843	-0.176081	0.293027	-0.0147439	-0.286076	-0.59871	-0.392431	0.0358939	-0.0868007	-0.149087	0.0325654	0.0031679	-0.0962765	-0.148562	0.0107494	-0.124848	0.455333	-0.15938	-0.763085	0.0235457	-0.0582712	-0.160689	-0.15705	0.00497932	-0.247353	-0.165555	-0.159584	-0.389664	-0.0627509	-0.103977
1685				3	0.0140961	-0.0132459	-0.252102	0.0455958	0.2627	-0.32761	-0.537152	-0.609549	-0.353822	-0.0666967	-1.14879	-0.76042	-0.130908	-0.0110154	-0.279674	-0.688999	0.0403959	-0.341906	-0.153973	-0.0868044	-0.0406754	-0.187134	-0.128722	-0.282984	0.0686473	0.0601915	-0.226388	-0.135983	-0.474837	-0.21308	-0.12854
1685				4	-0.0395595	0.899014	-0.248218	-0.614469	0.359193	-0.140872	-0.18233	-0.283192	-0.344749	-0.0980919	-0.62845	-0.17086	-0.417464	-0.149631	-0.394191	0.0316189	-0.275171	-1.32257	-0.280357	-0.174623	-0.242318	-0.254293	-0.163648	-0.310792	0.101509	-0.0240287	-0.314948	-0.263025	-0.335877	-0.138307	-0.146607
1685				5	-0.148934	0.874664	-0.205894	0.183522	0.166955	-0.313963	0.0907	-0.299853	-0.273118	-0.11833	-0.0420087	0.105766	-0.181039	-0.197003	-0.259019	0.170604	-0.18989	1.43341	-0.287773	-0.23476	-0.456159	-0.250443	-0.111327	-0.240917	0.100404	-0.000329177	-0.0807409	-0.165552	-0.456947	-0.207212	-0.0898738
1685				6	-0.139379	-0.667378	-0.216506	0.218782	-0.198767	-0.223559	-0.45274	-0.117698	-0.126123	-0.223508	-0.0287976	0.043009	-0.18901	-0.20074	-0.183041	0.298255	-0.261011	0.222036	-0.209073	-0.0672507	-0.197155	-0.0860219	-0.118928	-0.174559	0.0988503	0.0750719	-0.00425682	-0.0492399	-0.202288	-0.0773157	-0.125801
1685				7	-0.196533	-2.49475	-0.297385	-0.311678	-0.857833	-0.204873	-0.700486	-0.129803	-0.192825	-0.19525	0.865739	0.378831	0.22038	-0.202711	-0.0400752	0.504741	-0.277744	-0.740689	-0.179159	-0.0117362	-0.137842	-0.0230465	-0.120949	-0.222716	-0.0793848	-0.00698446	-0.14371	0.0148668	-0.142166	-0.135427	-0.0140369
1685				8	-0.171661	-1.27474	-0.241806	-0.787748	-0.580618	-0.275581	-0.446314	-0.227288	-0.22833	-0.0987509	-0.302542	0.00633583	-0.25194	-0.115837	-0.142541	-0.00211287	-0.212895	-0.688362	-0.146493	-0.00218185	-0.0245969	-0.0627709	-0.0969134	-0.0981081	0.00545807	-0.131643	-0.17714	-0.00553188	-0.10803	-0.0392763	-0.0260529
1685				9	-0.143401	-0.64545	-0.169062	-0.391751	-0.210124	-0.188074	-0.375295	-0.452982	-0.224403	-0.273565	-0.386885	-0.209777	-0.249154	-0.154511	-0.167521	-0.184772	-0.208119	-0.169403	-0.321942	-0.162249	-0.290787	-0.106286	-0.0272827	-0.254491	0.0153543	-0.232433	0.0411963	-0.0325309	-0.117793	-0.0124869	-0.0519066
1685				10	-0.184826	1.28641	-0.244502	-0.409317	0.56877	-0.0528706	-0.121054	-0.45776	-0.581866	-0.3128	-0.925277	-0.492388	-0.578721	-0.101757	-0.245615	-0.429299	-0.158919	-0.433205	-0.243647	-0.152285	-0.64492	-0.186089	-0.144557	-0.2521	-0.0330877	-0.223619	-0.0246592	-0.165088	-0.430475	-0.0233721	-0.0744418
1685				11	0.0413472	0.97891	-0.29619	-0.393709	0.640142	-0.127824	-0.234274	0.059859	-0.407725	-0.218479	-0.509426	-0.543376	-0.446393	-0.135369	-0.287883	-0.432012	-0.209866	-0.675583	-0.105831	-0.462058	-0.309191	-0.13088	-0.199549	-0.31213	0.126662	0.090651	0.0070247	-0.128752	-0.370729	0.200154	-0.00443815
1685				12	-0.136331	1.89081	-0.204571	-0.0194654	1.20653	-0.189873	0.389938	-0.339654	-0.252929	-0.403126	-0.165781	-0.06034	-0.270634	-0.114979	-0.0897306	-0.125108	-0.408927	-0.626001	0.0605134	-0.531582	-0.156485	-0.103378	-0.0907569	-0.226744	0.00170447	-0.148889	-0.1345	0.0362677	-0.376858	-0.0472864	-0.107563
1686				1	0.014539	3.06354	-0.202481	-0.998332	1.28519	-0.328807	0.522258	-0.146961	-0.132006	-0.387796	-0.246696	-0.0448581	-0.0123029	-0.158088	-0.109701	0.0504003	-0.368494	-0.355557	-0.0166849	-0.952127	-0.0351953	-0.0188349	-0.0428589	-0.249426	0.0743581	-0.136507	-0.22368	0.026181	-0.518437	-0.0451178	-0.0260461
1686				2	0.171314	1.90998	-0.131008	-0.779684	1.28399	-0.276637	-0.0226329	-0.326177	-0.148591	-0.177594	-0.0932261	-0.0623664	-0.0162375	-0.0676949	-0.235081	0.0790744	-0.108948	-0.932862	0.0269378	-0.914394	0.198675	-0.140796	-0.0988492	-0.1288	-0.0990131	-0.341415	-0.108097	-0.110314	-0.535376	0.052987	-0.125971
1686				3	-0.0979244	2.19764	-0.234808	-0.0796394	0.934176	-0.319352	0.550978	-0.144459	-0.711105	-0.0546156	-1.04446	-0.67982	-0.0694104	-0.0889211	-0.155645	-0.255502	0.148705	-0.856305	-0.0556666	-0.237294	-0.0981553	-0.165581	-0.0392862	-0.14682	0.0670069	0.109003	-0.124665	-0.100716	-0.33026	0.0232345	-0.17596
1686				4	-0.0878917	0.202025	-0.239488	-0.498216	-0.0126822	0.149697	-0.179512	-0.180235	-0.407711	-0.0208481	-0.706215	-0.275337	-0.374282	-0.173894	-0.256715	-0.149063	-0.129091	0.389968	-0.574009	-0.375932	-0.178811	-0.0873559	-0.00612183	-0.061385	-0.194531	-0.192463	-0.171069	-0.0963472	-0.119073	0.0438619	-0.0690842
1686				5	-0.237815	1.26038	-0.18659	-0.175638	0.234179	-0.102413	0.0699137	-0.250903	-0.294858	-0.134756	-0.388014	0.0485379	-0.237016	-0.0883029	0.0151965	-0.0930955	-0.0695385	1.15547	-0.281394	-0.230257	-0.28444	-0.209723	-0.0976629	-0.0991594	-0.166434	-0.109986	-0.220864	-0.210163	-0.17894	-0.240531	-0.135009
1686				6	-0.0902459	0.140657	-0.246571	-0.119016	-0.146215	-0.080945	-0.0592918	-0.659256	-0.236791	-0.00958544	-0.25453	-0.026409	-0.179287	-0.100486	-0.0616576	0.00107495	-0.120401	-0.698573	-0.17339	-0.24366	-0.319327	-0.164147	-0.212247	-0.366573	-0.0772866	-0.183925	-0.246086	-0.0969503	-0.355137	-0.0767988	-0.118877
1686				7	-0.0695073	-0.545864	-0.173427	-0.251325	-0.144112	-0.374283	-0.245284	-0.30675	-0.201433	-0.104832	0.440028	0.0866581	0.106558	-0.0812564	0.00320257	0.186695	-0.197013	-0.401183	-0.0215233	-0.152234	-0.422107	-0.126492	-0.138411	-0.342284	-0.0284262	-0.10796	-0.0530843	-0.0527774	-0.136366	-0.0323713	-0.0651252
1686				8	-0.118097	-1.43855	-0.19585	-0.433813	-0.514135	-0.207207	-0.200192	-0.179787	-0.513897	-0.0553148	-0.105481	-0.172711	-0.156618	-0.114515	-0.110276	-0.0207391	-0.11356	-0.980792	-0.148799	-0.00633319	-0.538345	-0.139502	-0.0945922	-0.264725	0.101426	0.049742	-0.156734	-0.127122	-0.0971173	-0.111193	-0.170548
1686				9	-0.111271	0.080323	-0.260054	-0.142951	-0.152547	-0.15159	-0.23459	-0.0263083	-0.325759	-0.0923633	-0.207484	0.0429789	-0.11042	-0.107469	-0.0991353	0.113967	-0.130906	-0.915386	-0.355501	-0.357435	-0.481059	-0.179403	-0.0778446	-0.16368	0.13549	0.0149442	-0.0586401	-0.0909549	-0.0605076	-0.0712981	-0.0654488
1686				10	-0.138762	-0.145147	-0.247838	-0.233899	-0.141058	-0.337929	0.0370477	-0.399736	-0.479775	-0.327304	-0.827777	-0.424264	-0.68297	-0.151941	-0.208828	-0.379134	-0.316159	-0.643384	-0.183548	-0.0181332	-1.06591	-0.280682	-0.184606	-0.410452	0.0491819	-0.0365336	-0.238034	-0.0729478	-0.22183	-0.244153	-0.0205344
1686				11	-0.076649	0.580828	-0.256632	-0.222928	0.20463	0.0545728	-0.522261	0.0129077	-0.566382	-0.494448	-0.180408	-0.174753	-0.168521	-0.14613	-0.14723	-0.00619414	-0.155995	-0.980857	-0.277954	-0.150416	-0.498652	-0.33451	-0.119141	-0.476433	0.156052	0.0908846	-0.295044	-0.136242	-0.256531	-0.230335	-0.121511
1686				12	-0.0468443	1.50386	-0.143946	0.207923	1.14756	-0.366143	-0.409498	-0.308971	-0.332832	-0.407446	-0.651443	-0.461938	-0.464876	-0.110116	-0.256256	-0.341773	-0.261279	-0.286319	-0.100068	-0.350394	-0.394776	-0.283505	-0.121791	-0.363523	0.0442994	0.150813	-0.222774	-0.020989	-0.217011	-0.140968	-0.111261
1687				1	0.0684521	-0.232694	-0.111939	-0.0198188	0.0903122	-0.209112	-1.22457	-0.160717	-0.196751	-0.15339	0.0602319	0.0415374	0.0131526	-0.119662	-0.1096	-0.0164685	-0.0314329	-0.0845492	-0.0345205	-0.779456	-0.220054	-0.203813	-0.0410717	-0.205161	0.0371248	-0.0221347	-0.092254	-0.11654	-0.352256	-0.019607	-0.110807
1687				2	0.0988082	0.846287	-0.0490227	-0.420722	0.643778	-0.4863	-1.16421	0.0824036	-0.138733	-0.283687	-0.1745	-0.0667646	-0.0162017	-0.0671761	-0.0685508	-0.167276	-0.285862	-0.826172	-0.077728	-1.25592	-0.0648046	-0.0882643	-0.0812616	-0.0700521	-0.0399292	-0.273046	-0.144685	-0.0744595	-0.346146	0.152068	-0.0353352
1687				3	-0.108232	0.0594432	-0.0439609	-0.0285856	-0.145425	-0.0456233	0.0323881	-0.0926346	0.0320843	-0.0243631	-1.10911	-0.636807	-0.0650711	-0.137299	-0.0661118	-0.252106	-0.107067	0.0665563	-0.137622	-0.545512	-0.169452	-0.0763381	0.0298227	-0.0442107	-0.0465528	-0.0591237	0.143575	-0.0057394	-0.207747	0.0148612	0.00834484
1687				4	-0.0180351	-1.43037	-0.0915906	-0.564733	-0.737425	-0.159135	-0.00174243	-0.310551	0.407145	0.0161373	-0.411323	-0.311287	-0.28284	-0.107467	-0.130228	-0.27576	-0.200334	1.31973	-0.188047	-0.358028	-0.141135	-0.0617173	-0.0826332	-0.119706	-0.100731	-0.15177	-0.306764	-0.103403	-0.155967	-0.0109553	-0.108795
1687				5	-0.163476	-0.490977	-0.175359	0.394475	-0.238439	-0.224211	-0.118185	-0.422389	-0.0685511	-0.152134	-0.253423	-0.162444	-0.152265	-0.172816	0.0540892	0.131537	-0.27603	2.21283	-0.120329	-0.177959	-0.269177	-0.214129	-0.185571	-0.233814	0.0191523	-0.128232	-0.240603	-0.135705	-0.232569	-0.210529	-0.112056
1687				6	-0.188018	-1.10329	-0.0922265	0.296212	-0.43314	-0.127074	-0.42733	-0.247405	-0.159938	-0.147042	-0.207348	0.144549	-0.140934	-0.170676	0.0845292	0.411888	-0.352342	0.792512	-0.140683	0.0634961	-0.284674	-0.189026	-0.133004	-0.164553	-0.128705	-0.0221561	-0.273695	-0.0583703	-0.189251	-0.176725	-0.138793
1687				7	-0.0850789	-0.374726	-0.2289	-0.174249	-0.161483	-0.18288	-0.418966	-0.245831	0.0457439	-0.0934471	-0.200944	0.043222	-0.260353	-0.0778117	-0.130657	0.000905736	-0.257568	0.735149	-0.00833683	-0.049146	-0.28684	-0.171328	-0.07301	-0.176039	0.0588264	0.00876309	-0.202006	-0.0983821	-0.0649684	-0.160356	-0.133431
1687				8	-0.151569	-0.881405	-0.179796	-0.490245	-0.32911	-0.241133	-0.400591	0.0670346	0.132675	-0.0611952	-0.000834274	-0.0625175	-0.119505	-0.10214	-0.158984	0.00746679	-0.161888	0.107848	-0.14704	0.00339619	-0.242828	-0.139048	-0.0883399	-0.155708	0.23931	0.346195	-0.153174	-0.114703	-0.179746	-0.0804349	-0.0925259
1687				9	-0.190453	-1.49705	-0.179545	-0.644335	-0.832922	-0.124993	-0.282482	-0.386107	0.00581792	-0.152412	0.052644	0.0198771	0.1353	-0.148543	-0.126479	-0.0185389	-0.209548	-0.392969	-0.0527213	0.12446	-0.1764	-0.0435059	-0.0650902	-0.205712	0.0620891	0.123573	0.0296473	0.0218781	-0.171603	0.0282255	0.0298881
1687				10	-0.243023	0.946373	-0.0967592	-0.00191449	0.415404	-0.164099	-0.127942	-0.187238	-0.534523	-0.207251	-0.650213	-0.338886	-0.596873	-0.089695	-0.1301	-0.417524	-0.259625	-0.0960727	-0.158791	-0.151238	-0.393974	-0.0574311	-0.0956263	0.00807959	0.0673418	0.190027	0.00155163	0.0750682	-0.195264	0.101044	-0.0815009
1687				11	-0.0598471	0.58459	-0.0520535	-0.287174	0.204189	-0.135504	0.261913	0.465312	-0.0944069	-0.224472	0.115463	0.0177373	0.00242294	-0.0916254	-0.00565853	-0.0540977	-0.189044	0.31209	0.0415195	-0.0310121	-0.171925	0.0369839	-0.0180992	0.0669862	-0.0100202	-0.209482	0.156578	0.0492366	-0.152181	0.00932159	-0.0804612
1687				12	-0.241148	1.57111	-0.11573	-0.535418	0.595444	0.191802	0.389296	-0.1088	-0.11967	-0.160622	-0.349047	-0.312666	-0.312984	-0.0520103	-0.0400766	-0.509361	-0.12136	0.155788	0.183633	-0.00221621	-0.228991	-0.0625612	-0.0791507	-0.01869	-0.00718187	-0.0608693	0.0926898	-0.0264287	0.173876	-0.052503	-0.049118
1688				1	-0.141669	-1.95985	-0.144931	0.175426	-0.93481	0.14568	-0.217336	0.0813352	0.277994	-0.273595	-0.283504	-0.175763	-0.231651	-0.198268	-0.0440329	0.049151	-0.340955	-0.150407	0.103327	-0.496134	-0.208619	-0.116131	-0.0156296	-0.021031	0.0136987	0.344608	-0.0781511	-0.128289	-0.0479057	0.035071	-0.0925286
1688				2	0.104057	-1.50175	-0.0201797	0.434827	-0.555588	-0.500082	-0.609624	0.0295691	0.245441	-0.0678378	0.214976	0.079145	0.152154	-0.0804665	0.0588639	0.111082	-0.0838099	-0.213962	0.0185512	-0.516901	-0.188672	-0.177042	-0.164979	-0.0847864	0.0855801	0.180241	0.0718714	-0.159136	0.164029	0.0854558	-0.0673176
1688				3	-0.0691577	-0.687331	-0.0917896	-0.128405	-0.236257	0.130951	-0.301477	0.196633	-0.2907	-0.0269552	-1.80447	-0.71048	-0.857233	0.00467631	-0.0714275	-0.408548	-0.284563	0.0411251	-0.140677	-0.23029	-0.0157006	-0.110306	-0.107916	-0.176827	-0.0588476	-0.202869	-0.172774	-0.117893	-0.245718	-0.0323781	-0.119957
1688				4	-0.0570289	-1.84695	-0.174358	-0.0996066	-0.957692	-0.0980839	-0.113674	-0.363681	-0.264423	-0.0373714	-0.0385345	-0.0296298	0.0668244	-0.129117	0.0363259	-0.0618829	-0.0262488	-0.291008	-0.114299	-0.210298	-0.210322	-0.0561822	-0.159473	-0.129889	-0.128205	-0.211341	-0.21946	-0.0767035	-0.292823	-0.258077	-0.131714
1688				5	-0.0361508	-0.249865	-0.0953574	0.280123	-0.164201	-0.398113	-0.0678293	0.15095	-0.288005	-0.0435887	-0.225119	-0.0311282	-0.058101	-0.0929129	0.0440013	-0.376578	-0.239691	1.85692	-0.155905	-0.337942	-0.206387	-0.133471	-0.15611	-0.255352	0.0207612	0.0581921	-0.0303068	-0.0909323	-0.0709171	-0.044181	-0.0536323
1688				6	-0.0725552	-1.26525	-0.112544	0.0833237	-0.35991	-0.294866	-0.333818	-0.205351	-0.0345146	-0.0793696	0.386308	0.0442125	-0.00788841	0.0124921	0.0476449	-0.155411	-0.292465	0.426217	-0.154291	-0.0426316	-0.199059	-0.0654512	-0.0939667	-0.079096	-0.158547	-0.0159821	-0.131977	-0.0967958	-0.178262	-0.180393	-0.069816
1688				7	-0.0259321	0.12005	-0.165078	0.161805	-0.00223573	-0.304062	-0.174232	-0.408263	-0.118492	-0.0444454	-0.208842	-0.0282635	-0.0689739	-0.0916057	-0.128776	0.097203	-0.11868	0.0430461	-0.213254	-0.146674	-0.107542	-0.10113	-0.0720964	-0.212235	-0.307046	-0.333805	-0.0871076	-0.0695086	-0.0658878	-0.229816	-0.0877101
1688				8	-0.100553	-0.470042	-0.119156	-0.639558	-0.407153	-0.039767	-0.119398	-0.0528242	0.00695623	-0.125889	-0.490176	0.00367699	-0.0149178	-0.0484372	-0.0772772	-0.0269408	-0.10825	-2.58083	-0.196381	-0.144734	-0.0752198	-0.0198994	-0.120658	-0.116762	-0.170887	-0.217582	0.0354108	-0.00213871	0.0436451	-0.138716	-0.072348
1688				9	-0.125597	-0.311273	-0.0548974	-0.47413	-0.119847	-0.158354	-0.0156229	0.0404028	-0.0862536	-0.176998	-0.196049	-0.0309385	-0.316095	0.00103099	0.0810767	-0.16281	-0.206	-0.552238	-0.042331	0.0697565	-0.0487621	-0.0501606	-0.138453	0.032739	-0.138264	-0.277553	0.0389608	0.0162896	0.111867	0.00420621	-0.149048
1688				10	0.00709502	-1.31341	-0.113878	-0.501348	-0.848089	-0.159045	-0.282139	-0.296209	-0.240651	-0.267844	-0.689171	-0.144888	-0.586623	-0.0808067	-0.11212	-0.101904	-0.248135	-0.462048	0.0246983	0.121174	-0.379232	-0.10784	-0.106576	-0.0507907	-0.108534	-0.0621044	-0.0992155	-0.043939	0.0489925	-0.0914073	0.00148977
1688				11	-0.0685733	-0.810265	-0.117168	-0.307779	-0.725312	-0.20962	-0.124817	0.175123	-0.39713	-0.285416	-0.26657	-0.36792	-0.0309499	-0.0985777	-0.0717463	-0.400134	-0.0511977	-0.136208	-0.203737	-0.0242019	-0.229327	-0.120225	-0.0838474	-0.0957297	-0.150499	-0.0618282	1.90099e-05	-0.0372102	0.0188925	-0.0823818	-0.047838
1688				12	-0.183178	0.593186	-0.146002	-0.60771	0.00561689	-0.190728	0.166033	-0.13751	0.214575	-0.16012	-0.0950628	0.0212031	-0.175599	-0.0484283	-0.192243	-0.00424287	-0.299239	-0.162689	0.220885	-0.219918	-0.0425574	0.0431422	-0.0484081	0.0826703	-0.00217508	0.114683	-0.107118	0.00381991	0.113138	-0.0561384	-0.0493717
1689				1	-0.116895	-2.51969	-0.0840708	0.366742	-1.49841	-0.146671	-0.233741	-0.317241	-0.275626	-0.287744	-0.127525	-0.100731	-0.122837	-0.0626499	-0.0836294	0.0604349	-0.368416	-0.574588	0.060187	0.301329	0.0648814	0.0336591	-0.0233562	0.0554155	-0.135027	0.151405	-0.086408	0.0459544	0.0884315	-0.0670351	-0.00501181
1689				2	-0.0380498	1.27031	-0.00547409	-0.0400329	0.687375	-0.0959144	-0.389729	0.329028	-0.328978	-0.163301	-0.411528	-0.355918	-0.385539	-0.0395329	-0.1995	-0.0460839	-0.317734	-0.22193	-0.0863892	-0.800913	0.0745921	-0.105915	-0.194766	-0.195506	0.193465	0.182156	0.0790812	0.0128131	-0.221188	0.106889	-0.0929963
1689				3	-0.0459014	0.310984	-0.0451606	-0.0860658	0.18965	-0.0622833	-0.231829	-0.292027	-0.278463	0.111631	-0.980512	-0.94256	0.578663	-0.12517	-0.204606	-0.518735	0.334816	-0.310135	0.00461133	-0.339812	-0.0753586	-0.161072	0.0396589	-0.159968	-0.190386	-0.334179	-0.130343	-0.0968325	-0.106327	0.0110828	-0.0587652
1689				4	-0.13689	-0.102088	-0.0765282	-0.418297	-0.153241	0.124794	0.038146	-0.254213	-0.0109554	-0.02966	-0.0694984	-0.0581959	0.0393462	-0.145837	-0.1756	0.00105831	-0.0275363	-0.479784	0.0564636	-0.240626	-0.289363	-0.109058	-0.094598	-0.0815819	-0.0712227	-0.000678889	-0.0676374	-0.0424932	-0.147435	0.0365739	-0.0787182
1689				5	0.0019008	-0.50024	-0.0917144	0.146672	-0.136601	-0.127632	-0.295849	-0.445371	-0.151414	-0.0699025	0.0109508	-0.042023	-0.0835812	-0.139981	0.0285365	0.165876	-0.168997	0.779447	-0.128008	-0.0722771	-0.187657	-0.116087	-0.136784	-0.0924264	-0.247707	-0.216006	-0.262364	-0.103525	-0.0612583	0.236689	-0.104518
1689				6	-0.0804364	-1.74868	-0.142903	-0.00633078	-0.514418	-0.130481	-0.409271	-0.252663	-0.293426	-0.116717	-0.0920129	-0.147919	-0.100893	-0.117833	-0.0639445	-0.124183	-0.142167	1.78386	-0.109095	0.0211015	-0.116444	-0.0970216	-0.113817	0.101938	-0.172563	-0.213576	-0.187744	-0.054302	-0.0932676	0.0404955	-0.0727438
1689				7	-0.0577237	-0.403608	-0.133264	0.310844	0.114517	-0.153184	-0.396907	-0.337936	-0.380428	-0.136862	-0.350058	-0.430077	-0.192126	-0.0350585	-0.08506	-0.491164	-0.13302	0.389796	-0.0497997	-0.233139	0.0110934	-0.0719452	-0.11183	0.137365	-0.137173	-0.192261	-0.00378698	-0.02559	0.0213706	0.0783465	-0.078448
1689				8	-0.0476524	-0.378998	-0.163198	-0.0230261	0.00563215	0.0177901	-0.27916	-0.239153	-0.369568	-0.0849188	-0.124608	-0.121792	-0.115731	-0.142164	-0.0621614	-0.156841	-0.171776	0.166552	-0.0219029	-0.130131	-0.200992	-0.0480881	-0.113843	-0.0106199	-0.12021	-0.147012	-0.184943	-0.0546251	-0.0858115	0.0605124	-0.198903
1689				9	-0.130013	-0.0516951	0.0127048	0.0235508	-0.00713682	-0.0222496	-0.27198	-0.272986	-0.24229	-0.148512	-0.379042	-0.166812	-0.185848	-0.194978	-0.0897912	-0.0349907	-0.229596	0.31988	0.301581	0.019371	-0.109214	-0.000960541	-0.0703602	0.102918	-0.10355	-0.038019	-0.130869	-0.0451557	-0.124369	0.184525	-0.234436
1689				10	0.0686814	-0.617829	-0.0510115	-0.238811	-0.669556	-0.246033	0.210458	-0.439193	-0.0872463	-0.253438	-0.926631	-0.458112	-0.611571	-0.0147285	-0.209455	-0.445699	-0.248333	-0.802685	-0.129749	0.073494	-0.207176	-0.0398053	-0.116929	-0.04603	-0.170301	-0.116425	-0.093606	0.00274722	0.0781387	0.468251	-0.0356291
1689				11	0.0144574	-0.135947	-0.0511304	-0.000309189	0.181095	-0.217208	-0.486222	-0.923969	-0.15725	-0.198027	-0.251591	-0.293984	-0.0584215	-0.0434305	-0.153703	-0.341122	-0.243573	-0.147019	-0.146511	-0.105595	0.137756	0.0064778	-0.0661949	-0.0971011	-0.0845012	-0.113236	0.0229015	0.0257075	-0.250881	0.00213661	-0.104944
1689				12	-0.112438	0.0334769	-0.116604	0.454197	0.126616	-0.218053	-0.143858	-0.0886485	0.0561872	-0.336559	-0.234999	-0.125882	-0.126147	-0.0806281	-0.0745691	0.103744	-0.492091	-0.401265	0.00220579	-0.0194758	0.0255884	-0.022566	-0.105951	0.0536348	-0.07635	-0.0548163	-0.0963266	-0.0325399	0.0555113	0.177802	-0.0508804
1690				1	-0.154788	2.09674	-0.0596072	-0.949946	0.69494	0.000963696	0.475349	-0.347823	0.21574	-0.00711765	0.127248	0.105578	0.290438	-0.0132076	-0.115234	0.0140815	-0.109133	0.107318	0.0402571	0.545766	-0.139316	-0.094818	-0.0783794	0.0615705	-0.2661	0.100124	-0.165384	-0.0296662	0.25748	0.236691	-0.0694592
1690				2	0.0276984	1.50894	-0.00497627	-0.197619	0.938314	-0.191408	-0.13535	0.404138	0.725894	0.193671	0.250272	-0.141165	0.308319	-0.0976288	0.122821	-0.268488	0.227934	-0.017527	-0.211858	-0.0570294	-0.0216585	0.0522596	0.00401789	0.179536	-0.134259	0.14418	-0.101661	-0.0641713	0.28532	0.236201	-0.00286833
1690				3	-0.344573	0.0832183	-0.0310214	-0.436048	0.316424	0.345325	-0.0739399	-0.0910691	0.859563	0.255254	-0.718684	-0.964744	1.05778	-0.0938611	0.128487	-0.701268	0.903742	0.655224	0.00257619	0.0273075	-0.0656846	0.0222203	-0.0485292	0.128208	-0.286205	-0.356909	0.061473	-0.0110933	0.045223	0.257009	-0.100576
1690				4	0.000801913	-0.12141	-0.0355069	0.0427534	0.230839	0.089743	-0.278955	-0.0407008	0.217429	-0.0251053	-0.164373	-0.175052	-0.00701094	-0.0930226	0.225064	-0.0100379	-0.169367	0.300538	-0.111492	-0.199297	-0.100569	0.0313823	-0.0941021	0.0612766	-0.245957	-0.196627	-0.15891	-0.104358	-0.278544	0.185189	-0.156876
1690				5	-0.183703	-0.995991	-0.146318	0.264407	-0.241431	-0.195928	-0.191326	-0.593107	0.0635137	-0.0532399	-0.0959342	-0.0919774	-0.189624	-0.119166	0.130082	0.0475676	-0.205387	0.476221	-0.17337	-0.234937	-0.0339059	-0.0941662	-0.111527	-0.0199357	-0.127467	-0.141023	-0.170293	-0.0920405	-0.253679	0.130175	-0.115415
1690				6	-0.0967061	-0.799821	-0.138005	-0.145253	-0.260931	-0.0095672	-0.266859	-0.209125	0.333756	0.0524225	-0.16461	-0.256412	-0.192871	-0.0100013	0.0899881	-0.0815924	-0.241262	-0.741748	0.00366761	0.0113483	-0.114756	-0.065228	-0.191917	0.0360964	0.0225879	0.109569	-0.118702	-0.041065	-0.116183	0.0624395	-0.0875067
1690				7	-0.0797613	-0.452051	-0.0483085	0.171673	-0.0935024	-0.0807233	-0.387569	-0.0212709	0.699436	0.00902901	-0.173337	-0.15633	-0.0657466	0.0270466	0.0580636	-0.106316	-0.20861	0.201259	-0.0964087	-0.0684627	0.0388892	-0.00990677	-0.142655	0.0634835	-0.0745296	-0.0546825	0.132743	0.0383024	0.0769746	0.291004	-0.0203998
1690				8	-0.184575	-0.598372	-0.0892734	0.0739855	-0.128062	-0.184294	-0.455982	0.141147	0.530798	-0.0203417	-0.3826	-0.236365	-0.20249	0.0196151	0.0171118	-0.24527	-0.163107	-1.88916	-0.157583	-0.102179	0.034756	0.028305	-0.153138	0.033602	-0.143495	-0.0458018	0.136067	0.0283808	0.0540411	0.373728	-0.0461754
1690				9	-0.148928	-0.287754	0.00563997	-0.0970318	-0.0491786	-0.146613	-0.286787	-0.182285	-0.0171809	-0.08049	-0.177136	0.0533758	-0.194055	0.0127955	0.0961486	0.00639683	-0.212028	-0.19797	-0.106406	-0.228086	0.254096	0.072604	-0.118208	0.132327	-0.207612	-0.256061	0.154546	0.0246342	0.347673	0.429375	-0.0805207
1690				10	-0.177786	-0.294387	-0.0846495	-0.596887	-0.368012	0.102692	-0.0583827	-0.00717574	-0.420182	-0.261916	-0.473182	-0.278209	-0.433388	-0.0656853	-0.0390949	-0.251048	-0.316037	-0.144555	-0.232702	-0.330096	0.0306473	-0.0795926	-0.134258	0.0361787	-0.140557	-0.319082	0.0370398	-0.0399221	0.0772194	0.478234	-0.0668849
1690				11	0.0146634	1.11396	-0.103882	-0.0439372	0.645165	-0.142049	-0.0518403	-0.90502	0.02057	-0.283589	0.0742246	-0.0448869	0.008577	-0.0354731	-0.122032	-0.0294788	-0.160668	-0.287956	-0.0135323	-0.127462	-0.161402	-0.0387473	-0.127076	-0.210352	-0.153397	0.0587372	-0.0610657	0.00173022	0.0263121	-0.0118462	0.00666644
1690				12	-0.0636499	0.572588	-0.0301627	-0.326347	0.352128	-0.0325943	-0.440801	-0.220462	0.324502	-0.175003	-0.308382	-0.194153	-0.286443	-0.0662982	-0.181451	-0.227766	-0.296624	-0.427028	-0.258123	-0.243725	-0.134556	-0.144961	-0.136219	-0.0422534	-0.229478	-0.240014	-0.18349	0.0159659	-0.0664827	0.0706354	-0.00921059
1691				1	-0.115693	-3.51101	-0.0789763	0.405446	-1.87396	-0.02949	-0.266503	-0.077781	0.606077	-0.0710443	0.682878	0.176135	0.572441	-0.140489	-0.0534952	0.122715	-0.096009	-0.612227	-0.235036	-0.0936481	-0.0439729	-0.157772	-0.123357	0.0762667	-0.346262	-0.075179	0.132088	-0.122363	0.0418121	0.162509	-0.0599587
1691				2	-0.246122	-2.65852	-0.00400162	-0.292456	-1.617	0.445619	-0.0384944	-0.25181	0.683704	0.153008	0.112647	-0.106031	0.347948	-0.0912297	0.181724	-0.544669	0.193113	-0.502577	0.173689	-0.430959	-0.270962	-0.145069	-0.00654691	0.10131	0.0815308	0.475514	0.122141	-0.24376	0.169036	0.132317	-0.0431058
1691				3	-0.187373	1.32449	-0.0317405	-0.87044	0.57288	0.176412	-0.32305	-0.0954393	0.364732	0.148242	-0.976546	-0.698834	0.032134	-0.0975652	0.283622	-0.554054	0.111094	-0.115479	0.189794	0.0995684	-0.273072	-0.0590251	-0.0705687	-0.0557997	-0.175505	-0.0903088	-0.168652	-0.0193312	0.103201	-0.00237166	-0.0713194
1691				4	0.0219525	-0.343274	-0.0258137	0.166202	-0.213096	0.10754	-0.193987	-0.238748	0.511666	0.0230591	-0.335907	-0.339246	-0.108267	-0.0787099	0.222001	-0.432011	-0.103008	-0.161903	-0.172416	-0.114617	-0.242484	-0.108892	-0.129026	-0.0116699	-0.0949596	-0.102232	-0.00952053	-0.0251764	-0.0972319	-0.0591521	-0.0848008
1691				5	-0.00903403	-0.734719	-0.154687	0.0205021	-0.155876	-0.0678845	-0.406704	-0.161026	0.407611	0.130529	-0.834312	-0.296982	-0.286407	-0.0642913	0.183543	-0.320224	-0.138951	-0.0839826	-0.149601	-0.0456248	-0.212069	-0.103974	-0.170836	-0.114468	-0.123768	-0.131303	-0.0945329	-0.0456671	0.107445	-0.0913001	-0.0711685
1691				6	-0.143581	-0.404296	-0.1032	-0.183405	-0.138818	-0.0244521	-0.366711	-0.104757	0.334119	-0.0427466	-0.509312	-0.18829	-0.150934	-0.0133182	-0.0266825	-0.00590785	-0.222501	1.22494	-0.282355	-0.115214	-0.143441	-0.0931058	-0.11073	0.0373267	-0.170014	-0.0129618	-0.0431591	-0.0458543	0.0409725	0.0121466	-0.120243
1691				7	-0.0436952	-0.42132	-0.050275	0.255167	-0.132581	-0.124279	-0.381166	0.0731703	0.602917	0.00518188	-0.134833	-0.207926	-0.0615104	-0.0241218	0.0485002	0.225392	-0.138707	0.417695	-0.272587	-0.177842	0.0377143	0.0101662	-0.122	0.296926	-0.169161	-0.194587	0.0778247	0.0689973	0.0743901	0.0980475	-0.0372684
1691				8	-0.0908386	0.42695	-0.0171756	-0.200921	0.211083	-0.328926	-0.318863	-0.0492556	0.393435	-0.00452976	-0.394061	-0.151509	-0.204422	-0.0437394	-0.0128946	-0.124256	-0.167622	-0.0602392	-0.303753	-0.0703314	-0.0126149	0.00810998	-0.148761	0.155897	-0.140455	-0.0431949	0.0670289	0.026071	-0.0109661	0.0235747	-0.0199627
1691				9	-0.0993275	-0.897729	0.00529283	-0.167262	-0.23479	-0.274135	-0.259949	-0.362785	0.135201	-0.22699	-0.384524	-0.00124493	-0.198514	-0.0924653	-0.0510988	-0.0931477	-0.268731	-0.350957	-0.242686	-0.0703698	-0.172951	0.00717621	-0.2094	0.015859	-0.180279	-0.376038	-0.0563131	0.0462388	0.321721	-0.0496001	-0.0781823
1691				10	-0.0597919	0.545273	0.0105082	-0.205945	0.109687	-0.160143	-0.194394	-0.160435	-0.267826	-0.231738	-0.497109	-0.476684	-0.32005	-0.0866718	-0.036003	-0.529159	-0.237656	-0.0567603	-0.360266	-0.125221	-0.415096	0.0298969	-0.152853	-0.0952567	-0.151886	-0.160848	-0.0501242	0.130801	0.25364	0.0472894	0.0670759
1691				11	-0.0775016	-1.54896	-0.156729	-0.262618	-0.597299	-0.340001	-0.487784	-0.329877	-0.339057	-0.111359	0.0333577	-0.0594779	0.111029	-0.0389883	0.0105978	0.0839591	-0.179921	-0.370668	-0.098808	0.0337729	-0.54519	-0.113813	-0.0871605	-0.124597	-0.151622	-0.331335	-0.057705	0.06127	-0.0430868	-0.374769	-0.0728452
1691				12	-0.253589	-1.89801	-0.169611	-0.04634	-0.978463	0.0223848	0.329259	-0.221684	-0.223009	-0.217421	-0.266257	-0.474596	-0.200219	-0.0522926	-0.203786	-0.569471	-0.0656326	0.130435	-0.0598441	0.240315	-0.413647	-0.084715	-0.133079	-0.197727	-0.153241	0.00422376	-0.350567	0.0344805	-0.0842401	-0.414134	-0.118896
1692				1	0.127261	-3.31182	-0.00293986	0.897341	-1.9371	0.0982218	-0.688786	0.0461408	-0.0560557	-0.0841955	-0.24035	-0.174645	0.0223403	-0.0161297	-0.161403	0.0634237	-0.0136716	0.290589	0.0270849	0.341685	-0.0880956	-0.0659045	-0.119374	0.00538006	-0.191357	0.127546	-0.346214	0.0256717	-0.292805	-0.274904	0.00244783
1692				2	-0.0410062	-3.4339	-0.126307	-0.577975	-2.52223	0.146092	0.411011	0.321261	0.312446	-0.121657	-0.0915191	-0.42968	-0.101808	-0.0728257	-0.11645	-0.302238	-0.299474	-0.88583	-0.267585	-0.567017	-0.168894	-0.0721491	-0.0804681	-0.060895	-0.0144547	0.184264	-0.367164	0.030273	-0.150048	-0.15647	-0.0391614
1692				3	-0.214149	-0.224967	-0.130442	-0.321699	-0.0787155	-0.0452464	-0.291686	-0.21604	0.0634755	0.0820459	-1.26676	-0.694996	-0.417295	-0.00137761	-0.21087	-0.356717	-0.0466269	-0.178772	-0.115281	-0.244837	-0.179137	-0.0148414	-0.206387	-0.182926	-0.138294	-0.0661494	-0.310182	0.110401	-0.185145	0.0828582	-0.0572794
1692				4	-0.120654	-0.360922	-0.0642754	-0.0568963	-0.20792	-0.0416359	-0.135774	-0.156141	0.0301785	0.086631	-0.0945457	-0.0691446	-0.102488	-0.0663712	-0.0399299	0.0437453	-0.0149058	0.641933	-0.1376	-0.0666203	-0.261222	-0.0677674	-0.127315	-0.155688	-0.145413	-0.266144	-0.312537	-0.0719599	-0.0248767	-0.220674	0.0102538
1692				5	-0.146499	-1.81208	-0.138111	-0.657855	-0.691042	-0.261504	-0.378149	-0.243699	0.128453	-0.0650883	-0.504751	-0.461993	-0.422647	-0.13411	0.0695388	-0.397986	-0.25652	1.0884	-0.256968	-0.19427	-0.23717	-0.0435395	-0.115035	-0.213236	-0.200149	-0.211482	-0.157956	-0.0616431	-0.0650329	-0.112222	-0.07476
1692				6	-0.0464455	-1.13677	-0.0915513	0.465262	-0.182559	-0.181453	-0.32995	0.1222	0.123849	0.0120935	-0.106957	-0.260902	-0.0963036	-0.0283939	0.0855974	-0.347993	-0.227474	1.23011	-0.0934164	0.138701	-0.169987	-0.077437	-0.115844	0.00456607	-0.00339975	0.0175568	-0.275215	0.00790812	-0.0129282	-0.201887	0.0263163
1692				7	-0.0698488	-1.55014	-0.141938	0.141281	-0.50078	-0.277414	-0.407697	-0.111979	0.0897216	0.0415455	-0.929675	-0.666924	-0.456263	-0.0178848	-0.187614	-0.585136	-0.0368703	-0.201756	-0.120379	-0.293038	-0.150924	-0.123554	-0.153912	-0.04337	-0.152662	-0.0673024	-0.126622	0.0229463	0.078941	0.0425627	-0.0732829
1692				8	-0.177196	-0.950192	-0.147932	-0.330793	-0.299008	-0.0491169	-0.485728	-0.142865	0.180269	-0.0524977	-0.701499	-0.351511	-0.384995	-0.0952569	-0.111279	-0.27962	-0.142004	-0.305238	-0.350075	-0.186753	-0.0615021	-0.0236684	-0.137071	0.0128939	-0.245402	-0.0949361	-0.019126	0.0471205	0.0768129	-0.0729333	-0.085297
1692				9	-0.0920738	-1.63833	-0.121973	-0.234811	-0.758025	-0.162362	-0.234657	0.00345822	0.0877462	-0.165899	-0.887957	-0.480335	-0.337072	-0.0666475	-0.0480356	-0.429257	-0.211654	0.777375	-0.106199	0.0315599	-0.160868	0.0324047	-0.160645	-0.10085	-0.133061	-0.0441607	-0.209431	0.129067	0.28046	0.0683217	0.0796279
1692				10	-0.248291	-1.54041	-0.127359	-0.48744	-1.06023	-0.115808	-0.208481	0.174369	-0.251068	-0.264989	-0.454217	-0.390825	-0.328412	-0.0628204	-0.0503101	-0.402146	-0.270508	0.238374	0.103159	0.0328493	-0.134193	0.0655872	-0.0873255	0.0698052	-0.0791349	-0.14097	0.0158358	0.0184218	-0.212263	0.220522	-0.101477
1692				11	0.0161931	-0.37982	-0.0598488	-0.410417	-0.255646	-0.225707	-0.24878	0.371627	0.202724	-0.272402	0.036337	0.0611886	0.0138356	-0.0896856	-0.0593676	-0.099167	-0.218535	-0.478774	-0.0989072	-0.160987	-0.398181	0.00842139	-0.186152	0.0488798	-0.164935	-0.0494781	0.011938	0.0305331	-0.275387	-0.18662	-0.127296
1692				12	-0.258531	0.558104	-0.0780677	-0.168524	-0.267712	-0.055225	-0.0927733	0.02928	0.371655	-0.16885	-0.0959318	-0.304558	-0.136652	-0.0581348	-0.0474485	-0.29807	-0.356911	0.041128	-0.0875807	-0.0467499	-0.00260226	0.0209521	-0.131065	-0.0341071	-0.191342	-0.1024	-0.197271	0.0160002	-0.184593	-0.273322	-0.156855
1693				1	-0.105368	0.104837	-0.220256	-0.347894	0.0286452	0.0200596	-0.213842	-0.467042	0.296146	-0.00422611	0.0075651	0.0258762	0.247461	-0.0796329	-0.0813501	0.16831	0.0648673	-0.153326	0.131632	0.164063	-0.13589	-0.00387179	-0.0974091	-0.0578161	-0.104853	-0.046276	-0.239845	0.0519035	-0.0453232	-0.358774	-0.0498421
1693				2	0.117401	2.52013	-0.0773201	-1.3379	1.46254	-0.466414	-0.362071	-0.0781675	0.277645	-0.128034	-0.113404	-0.262495	0.0476253	-0.0749486	-0.0974357	-0.317583	-0.321987	-0.269068	0.0103019	-0.569124	-0.175084	-0.0388773	-0.033183	-0.103505	0.149377	0.19912	-0.324802	0.0172839	0.0945924	-0.210443	-0.00598113
1693				3	-0.226085	-0.65187	-0.209101	-1.32465	-0.647494	0.291044	0.164216	0.0805665	0.548009	0.101886	-1.42028	-0.663435	-0.327632	-0.153895	0.0407589	-0.187314	-0.129183	-0.159993	-0.0784346	-0.0181942	-0.238748	-0.0416187	-0.0516459	-0.110724	-0.152416	-0.00433985	-0.0565481	0.036598	-0.0748369	0.0804378	-0.0579584
1693				4	-0.0731345	-0.604186	-0.080116	-0.122879	-0.469296	0.0373153	-0.0125752	-0.43848	0.18668	-0.082011	0.197654	0.0314373	0.0656095	-0.125673	-0.0519328	0.107117	-0.339353	0.625817	-0.0236145	0.218832	-0.19098	-0.151717	-0.107497	-0.157151	-0.0224728	-0.151611	-0.19382	-0.0654062	-0.202222	-0.0976233	-0.204758
1693				5	-0.191928	-1.83557	-0.125724	0.112869	-0.358011	-0.166681	-0.314491	-0.0488168	0.0633916	-0.0554791	0.310605	-0.265367	0.0687244	-0.00601031	-0.0931562	-0.180781	-0.339232	-0.346424	-0.0815467	-0.106524	-0.106549	-0.113406	-0.159654	-0.0397378	-0.0989707	-0.255834	-0.157746	0.0225549	-0.0899677	-0.0165836	-0.046947
1693				6	-0.163648	0.23274	-0.190138	0.47548	0.161241	-0.125244	-0.403471	-0.132375	0.234275	-0.130696	-0.0937962	0.0186436	-0.22089	-0.0734397	0.0410398	0.392173	-0.289546	-0.228001	-0.138176	-0.219396	-0.12234	-0.0902982	-0.0973542	0.0771521	-0.00838652	0.0367704	-0.160324	-0.0463388	-0.312553	-0.088735	-0.0729631
1693				7	-0.168735	-0.661656	-0.176868	-0.0142861	-0.106697	0.000511678	-0.246324	-0.400985	0.44544	-0.0714973	0.315702	0.172321	0.0837495	-0.00313905	0.122364	0.215904	-0.228927	-0.120313	0.00876541	-0.0694583	-0.135994	-0.0563946	-0.100548	-0.103184	-0.059824	0.00719287	-0.14914	0.0042085	0.152635	-0.133516	-0.0843437
1693				8	-0.206119	-0.392329	-0.134453	-0.41391	-0.364512	-0.0761717	-0.211127	-0.229324	0.302313	-0.116731	-0.290499	0.0430504	0.0337292	-0.127766	0.0155458	0.160693	-0.201636	-0.204963	-0.245125	-0.0855759	-0.220297	-0.0393906	-0.132613	-0.00122623	-0.231046	-0.172241	-0.053258	0.0226778	-0.00561603	0.0101012	-0.0457977
1693				9	-0.266976	-0.862197	-0.0720196	-0.541854	-0.470096	-0.171128	-0.229561	-0.146853	0.0811849	-0.171066	-0.830313	-0.383064	-0.278245	-0.15105	-0.0606584	-0.308853	-0.229054	0.0365215	-0.0932686	-0.0204773	-0.376048	-0.103774	-0.153278	0.0347741	-0.132526	-0.075898	-0.0907446	-0.0388519	-0.0615471	-0.0181899	-0.162172
1693				10	-0.155646	0.348385	-0.0666212	-0.690094	0.0146141	-0.187614	-0.243182	-0.439225	-0.0102161	-0.201405	-0.453182	-0.327971	-0.437657	-0.0401001	-0.0182571	-0.521194	-0.155684	-0.166381	-0.018587	-0.273327	-0.486113	-0.000513903	-0.148218	-0.00361627	-0.0998192	-0.146474	0.10068	0.0638167	0.143202	0.30238	-0.0288447
1693				11	-0.0777533	0.311321	-0.0872632	-0.724688	0.156072	-0.243084	-0.369404	0.30256	-0.133767	-0.0637266	-0.136674	-0.426885	-0.244155	0.00232677	-0.0138735	-0.512798	-0.0761611	-0.532636	-0.0509507	0.0536666	-0.32924	-0.0120864	-0.0490612	-0.19235	-0.171852	-0.229948	0.0888347	0.158852	-0.0347574	0.106371	0.0395415
1693				12	-0.182848	-0.190404	-0.192512	-0.575357	-0.451144	0.0358166	-0.751963	-0.353101	-0.169713	-0.106022	-0.142864	-0.0720281	-0.0540592	-0.057143	-0.0774397	0.0277515	-0.255183	-0.149246	0.0415315	-0.203403	-0.262328	-0.0736085	-0.121734	0.0541078	-0.0703857	-0.17464	-0.043926	0.0461116	-0.188908	0.0679918	-0.0928364
1694				1	-0.0586422	-3.1719	-0.202189	0.407868	-1.76987	-0.0190229	-0.647496	0.221213	0.128572	-0.0160517	0.0690088	0.115262	0.152843	-0.0863297	-0.0420759	-0.0154233	-0.15977	0.0345353	-0.165536	-0.237334	-0.240453	-0.0427664	-0.100453	-0.042544	-0.0507601	-0.0698641	-0.200061	0.0596511	0.0606014	-0.141216	-0.0897286
1694				2	-0.0635492	1.86293	-0.185783	-0.673496	1.29114	-0.691643	-0.395886	0.37567	0.481016	0.138169	0.176289	0.330516	0.162475	-0.111472	-0.0100658	0.0659681	-0.0732555	0.0293565	0.147303	-0.458411	-0.406321	-0.120842	-0.0984659	-0.14133	0.0692913	0.242349	-0.121831	-0.0512528	0.14919	-0.0510989	-0.0516221
1694				3	-0.114881	-0.296956	-0.0872043	-0.508672	-0.206998	-0.0517316	-0.289939	0.0145255	0.240506	0.0124945	-1.54708	-0.647765	-0.467039	-0.053658	-0.119647	-0.515175	-0.189306	-0.542304	-0.136584	-0.189729	-0.370397	-0.15083	-0.228346	-0.190958	-0.112997	-0.28287	-0.336806	-0.123535	0.0341661	-0.0770692	-0.0787504
1694				4	-0.0572177	0.368361	-0.273384	0.148834	0.204129	-0.113391	-0.361256	-0.0883707	0.0977215	-0.00584488	-0.241822	-0.158995	-0.0252995	-0.115249	-0.187757	-0.246997	0.0208837	-0.456936	-0.105785	-0.0255828	-0.424246	-0.142679	-0.0911209	-0.243367	0.00483665	-0.038472	-0.46528	-0.0626577	-0.0647231	-0.0943541	-0.139542
1694				5	-0.253707	-0.190575	-0.197824	-0.430816	-0.226382	-0.330373	-0.296375	0.114356	-0.212878	-0.130623	-0.280472	-0.107462	-0.309058	-0.155447	-0.280546	-0.110347	-0.152821	0.224925	-0.265241	-0.077013	-0.525838	-0.187199	-0.111182	-0.339085	-0.111769	-0.135457	-0.25809	-0.155271	-0.109417	-0.214503	-0.078939
1694				6	-0.232999	-0.635072	-0.270661	0.0253441	-0.125072	-0.240552	-0.324842	0.0794044	-0.49685	-0.246669	0.0699935	0.170805	-0.124181	-0.219146	-0.15894	0.0482074	-0.206607	-3.22635	-0.132131	-0.0350918	-0.569035	-0.21984	-0.198259	-0.360703	0.0457374	0.109295	-0.334203	-0.12813	-0.351175	-0.122165	-0.035705
1694				7	-0.182104	-0.712248	-0.338798	-0.322895	-0.234734	-0.210848	-0.466224	-0.317299	-0.165917	-0.107745	-0.780026	-0.549765	-0.440823	-0.178844	-0.15489	-0.585561	-0.203679	-0.778127	-0.223542	-0.136331	-0.372139	-0.123449	-0.144394	-0.341971	-0.0572205	-0.044687	-0.0662965	-0.0575667	-0.174367	0.0136054	-0.0669792
1694				8	-0.22611	-1.29457	-0.390343	-0.120217	-0.502772	-0.30957	-0.442412	0.00423768	-0.214744	-0.238376	-0.51105	-0.605467	-0.380568	-0.328213	-0.227834	-0.49035	-0.177498	0.832432	-0.255427	-0.132243	-0.67069	-0.197149	-0.157125	-0.350456	-0.0231741	-0.0566689	-0.223599	-0.0363661	0.026991	-0.21694	-0.13909
1694				9	-0.253519	-1.50953	-0.250702	-0.391915	-0.653855	-0.316377	-0.41279	-0.355614	-0.199382	-0.132103	-0.581883	-0.298976	-0.276006	-0.0623941	-0.365865	-0.128015	-0.230962	0.608059	-0.48646	-0.110098	-0.736373	-0.146877	-0.0736656	-0.287886	0.0112496	0.0556966	-0.268006	0.0107258	0.0555756	-0.242376	0.04043
1694				10	-0.162855	-1.49076	-0.249082	-0.722701	-0.830026	-0.238241	-0.306872	0.105395	-0.361973	-0.3426	-0.545274	-0.378633	-0.374989	-0.117548	-0.318842	-0.303692	-0.177925	-1.19484	-0.338957	-0.0792179	-0.706081	-0.151542	-0.112184	-0.251287	-0.0239906	0.106112	0.134681	0.0547301	-0.0844456	0.144053	-0.0559672
1694				11	-0.158489	-0.779928	-0.268787	-0.102801	-0.315855	-0.249183	0.386075	-0.0788644	-0.486012	-0.454329	-0.560489	-0.507038	-0.467788	-0.201964	-0.287158	-0.596049	-0.298144	-0.558416	-0.240816	-0.094379	-0.443835	-0.156059	-0.148625	-0.258972	-0.00463289	0.104343	-0.145124	0.0881694	-0.111099	0.0892452	-0.11952
1694				12	-0.265354	-1.35715	-0.34561	-0.243538	-0.322106	-0.173688	-1.18116	-0.175561	-0.0839056	-0.447956	-0.31514	-0.301773	-0.246611	-0.103533	-0.384439	-0.463289	-0.378959	-0.364463	-0.292266	0.136108	-0.435136	-0.267567	-0.158739	-0.31646	-0.065356	0.0835895	-0.186863	0.021419	-0.324625	-0.25872	-0.130375
1695				1	-0.122336	-5.23285	-0.342999	-0.451542	-3.20198	0.336592	-0.356666	0.155677	0.157041	-0.158288	-0.245877	0.0101244	-0.134186	-0.182531	-0.225815	-0.0845933	-0.0420329	-1.10212	-0.0877718	0.0748375	-0.131396	-0.108509	-0.048682	-0.174306	-0.173693	-0.00706565	-0.0222944	0.0925777	-0.0278461	-0.231193	-0.0646012
1695				2	-0.0155374	-3.65787	-0.259094	-0.0809032	-1.77666	-0.429805	-0.728516	0.00918244	0.26164	0.0550374	-0.20487	0.00285844	-0.22538	-0.21852	-0.162949	-0.0873961	-0.175149	-0.562176	-0.210003	-0.501671	-0.523776	-0.225664	-0.190913	-0.166226	0.0958683	0.0086593	-0.119026	-0.0676198	0.239515	-0.165464	-0.123138
1695				3	-0.185933	-0.647102	-0.282841	-0.726627	-0.317809	-0.0914326	-0.575365	-0.187657	-0.0697719	-0.0346685	-2.31076	-0.830009	-1.58175	-0.203967	-0.229543	-0.420085	-0.630424	-0.432561	-0.141446	-0.131239	-0.39161	-0.145398	-0.137366	-0.26199	-0.154068	-0.184726	-0.0800199	-0.108542	-0.259978	-0.164533	-0.103512
1695				4	-0.175641	-1.46006	-0.374551	-0.824913	-1.0134	-0.104532	-0.153644	0.217062	0.0206264	-0.0711334	-0.601494	-0.247479	-0.29895	-0.108924	-0.0437045	-0.343201	-0.330261	0.0707393	-0.444221	-0.205092	-0.425231	-0.246141	-0.119327	-0.270081	-0.0954002	-0.153998	-0.419333	-0.180728	-0.199596	-0.280103	-0.0102997
1695				5	-0.358498	-1.65037	-0.458419	-0.426445	-0.654473	-0.204529	-0.284397	0.316406	-0.167461	-0.0387974	-0.679863	-0.277535	-0.272159	-0.0649016	-0.0585683	-0.270088	-0.327416	1.15675	-0.480027	-0.194623	-0.284135	-0.205231	-0.165347	-0.227007	-0.00264581	-0.229139	-0.306762	-0.0825457	-0.2586	-0.0366527	-0.143148
1695				6	-0.253318	-0.784634	-0.507199	-0.571992	-0.415763	-0.29578	-0.542162	0.0636555	-0.288262	-0.156755	-0.507649	-0.169744	-0.279333	-0.13309	-0.152604	0.0324203	-0.299978	-1.15795	-0.42696	-0.284004	-0.107479	-0.146224	-0.191886	-0.182163	-0.106607	-0.176663	-0.212118	-0.0884874	-0.105662	-0.110279	-0.205715
1695				7	-0.180036	-1.5181	-0.407453	-0.295189	-0.574473	-0.472385	-0.63668	-0.301638	-0.277813	-0.116301	-0.932719	-0.414698	-0.456452	-0.257574	-0.203424	-0.312052	-0.107627	0.0611888	-0.472512	-0.290608	-0.446872	-0.165846	-0.194539	-0.258195	-0.181644	-0.175549	-0.132121	-0.0845271	-0.187756	-0.127813	-0.154259
1695				8	-0.293046	-2.08477	-0.329622	-0.419843	-0.877302	-0.255539	-0.679238	-0.252729	-0.413441	-0.193043	-0.175187	-0.0435566	-0.309584	-0.219435	-0.154845	0.309163	-0.239811	-0.495712	-0.431584	-0.0245674	-0.726469	-0.182594	-0.15339	-0.24876	-0.0348061	-0.0627453	-0.165759	0.00104465	-0.225108	-0.139137	-0.157568
1695				9	-0.304055	-1.31722	-0.263853	-0.176098	-0.858218	-0.114331	-0.493126	-0.216504	-0.299224	-0.134361	-0.745906	-0.100271	-0.437158	-0.302394	-0.353057	-0.128415	-0.24694	-0.266363	-0.224189	0.10194	-0.766717	-0.120891	-0.131224	-0.223965	-0.0955495	-0.10467	-0.00356731	0.0414799	-0.156211	0.0798726	-0.152189
1695				10	-0.127911	0.187776	-0.294536	-0.518373	0.136936	-0.195823	-0.267508	0.0308644	-0.365818	-0.365611	-0.353632	-0.190031	-0.308005	-0.115398	-0.198898	-0.348802	-0.197722	-0.349243	-0.287348	-0.0985384	-1.08191	-0.209498	-0.157415	-0.287682	0.0179329	0.0808551	-0.123855	-0.0137552	-0.0121208	-0.165794	-0.119211
1695				11	-0.2498	0.319363	-0.474308	-0.0917952	0.58671	-0.382358	-0.467059	-0.452678	-0.625853	-0.308499	-0.285915	-0.30855	-0.344386	-0.206207	-0.362771	-0.123257	-0.366885	-0.347154	-0.228157	-0.0171581	-0.931014	-0.321701	-0.152625	-0.275524	-0.0145406	-0.0572658	-0.284399	-0.0530145	-0.374016	-0.455207	-0.128744
1695				12	-0.19383	0.545992	-0.443926	-1.05959	0.409435	-0.225777	0.202184	-0.014991	-0.339321	-0.494171	-0.749951	-0.446354	-0.646781	-0.23321	-0.503684	-0.236117	-0.395861	-0.553719	-0.269946	-0.164139	-0.990142	-0.352881	-0.220352	-0.370754	0.150474	0.0214004	-0.636059	0.0141101	-0.67697	-0.400163	-0.0164223
1696				1	-0.187741	2.50983	-0.342396	-0.72245	1.35906	-0.115586	0.106407	-0.63325	-0.375691	-0.333108	-0.698279	-0.575717	-0.447907	-0.1398	-0.32863	-0.441205	-0.34093	0.339227	-0.0643496	-0.23112	-0.400798	-0.14554	-0.215987	-0.314555	-0.0538539	-0.172993	-0.360795	-0.064668	-0.463061	-0.263791	-0.107353
1696				2	0.0352229	1.84669	-0.348616	-0.558425	0.6273	-0.3802	-0.217795	-0.243039	-0.274325	-0.329986	-0.835905	-0.437834	-0.726994	-0.220435	-0.42005	-0.0189738	-0.493083	-0.699626	-0.131298	-0.517445	-0.302022	-0.22689	-0.188893	-0.264794	0.0906937	-0.123967	-0.0538763	-0.0989251	-0.322222	-0.33554	-0.123676
1696				3	-0.066024	-0.877866	-0.469271	-0.800679	-0.636124	-0.142895	-0.0738121	-0.263482	-0.703136	-0.353278	-1.60604	-0.559135	-0.894008	-0.22301	-0.686919	-0.108642	-0.526106	-1.22727	-0.296067	-0.0459127	-0.348705	-0.274977	-0.23926	-0.469553	0.0714797	0.0153316	-0.215423	-0.166186	-0.396486	-0.324891	-0.168266
1696				4	-0.197099	-1.27002	-0.464306	0.444241	-0.756951	-0.125744	-0.535392	0.046337	-0.692342	-0.112363	0.183074	0.341017	0.108882	-0.203805	-0.633861	0.081481	-0.360445	-2.96127	-0.354076	-0.0463633	-0.288046	-0.231147	-0.195459	-0.287663	-0.0438255	-0.0383996	-0.519755	-0.229131	-0.441186	-0.28116	-0.0840684
1696				5	-0.278197	-0.60972	-0.390895	-0.368275	-0.439556	-0.443228	-0.369221	0.0269765	-0.741519	-0.0885144	-0.631877	-0.342415	-0.233272	-0.247956	-0.390153	0.0681017	-0.187249	-3.44578	-0.411999	-0.0526066	-0.359107	-0.209736	-0.171996	-0.194487	-0.0320304	-0.161292	-0.00041097	-0.102642	-0.46232	-0.267436	-0.137193
1696				6	-0.328993	-1.0231	-0.477915	-0.478118	-0.394044	-0.56056	-0.491426	-0.582918	-0.766717	-0.131602	0.656009	0.728877	0.151791	-0.190442	-0.237767	1.06967	-0.174409	-1.12293	-0.262158	-0.235166	-0.0518784	-0.151215	-0.176851	-0.18648	-0.0629376	-0.142988	-0.221115	-0.046808	-0.385606	-0.22153	-0.124504
1696				7	-0.343324	-1.03537	-0.503553	-0.883574	-0.63335	-0.391905	-0.642612	-0.168079	-0.833639	-0.0624584	0.555034	1.19127	0.0559594	-0.149679	-0.383783	1.55179	-0.230857	-1.67121	-0.28499	-0.0736812	-0.230245	-0.208164	-0.0973974	-0.233029	-0.0370779	-0.182303	-0.038743	-0.0919982	-0.148154	-0.182989	-0.102647
1696				8	-0.309894	-0.578732	-0.461737	-0.874007	-0.550475	-0.355864	-0.334864	-0.318074	-0.846083	0.0208265	-0.367566	0.200163	-0.337971	-0.210005	-0.440763	0.309163	-0.182034	-1.11809	-0.204723	0.086652	-0.315132	-0.127768	-0.126155	-0.180248	-0.0429895	0.00994236	0.100072	0.0257105	-0.197589	0.0731848	-0.0334858
1696				9	-0.339217	-1.45062	-0.33197	-0.705143	-0.639468	-0.468499	-0.36363	-0.336583	-0.436672	-0.124426	0.0197117	-0.20535	-0.112829	-0.144978	-0.29935	0.0331398	-0.164073	-0.58252	-0.336897	-0.0442915	-0.443122	-0.201307	-0.122972	-0.0506179	-0.0152253	0.0337993	0.195665	-0.103141	-0.30703	0.0185628	-0.15058
1696				10	-0.2122	-0.563748	-0.381505	-0.709716	-0.464467	-0.227806	0.115844	-0.121641	-0.41227	-0.432002	-0.453156	-0.473036	-0.252224	-0.176636	-0.292259	-0.394224	-0.185669	-0.629723	-0.384588	-0.0491705	-0.576118	-0.173901	-0.0830664	-0.202696	0.028245	0.143432	0.0251722	-0.0559419	-0.308405	0.0288186	-0.106739
1696				11	-0.272814	0.049502	-0.416952	-1.39298	-0.29497	-0.243024	-0.0832391	-0.700286	-0.734196	-0.453116	-0.25127	-0.0171648	-0.294429	-0.231611	-0.26625	0.182919	-0.488217	-0.919296	-0.501938	-0.177059	-0.638777	-0.21352	-0.139628	-0.246361	-0.0349645	-0.132417	-0.0231152	-0.00944684	-0.439972	-0.306436	-0.173727
1696				12	-0.148205	-0.494649	-0.406433	-1.00038	-0.469504	-0.339833	-0.529223	-0.511069	-0.592796	-0.187542	-0.601996	-0.135814	-0.68579	-0.146262	-0.353643	-0.0649266	-0.559855	-1.57687	-0.0333396	-0.146926	-0.519393	-0.224735	-0.162822	-0.266928	0.00641181	0.0448446	-0.246814	-0.0725217	-0.379482	-0.550558	-0.140228
1697				1	-0.235261	-3.74643	-0.430951	-0.229727	-2.20429	0.212429	-0.763941	-0.932202	-0.41598	-0.385862	-0.798432	-0.443925	-0.698537	-0.152173	-0.470365	-0.22578	-0.5024	0.274179	-0.0514349	-0.0806057	-0.387387	0.0286466	-0.196479	-0.383923	0.0787278	-0.0291585	-0.347869	0.095061	-0.357735	-0.460023	-0.00864913
1697				2	-0.137335	-3.18552	-0.378658	-1.02197	-2.3223	-0.109415	-0.575103	-0.582876	-0.0325895	-0.254336	-0.658976	-0.160042	-0.640501	-0.214355	-0.463391	0.143628	-0.486899	-0.729517	-0.349668	-0.288766	-0.254357	-0.124275	-0.163579	-0.33718	-0.00139885	-0.296372	-0.344438	0.00726465	-0.387492	-0.367946	-0.0749795
1697				3	-0.325097	1.22469	-0.474886	-0.567807	0.670431	0.129113	-0.834718	-0.398794	-0.318042	-0.114091	-1.40492	-0.778115	-0.60649	-0.219637	-0.448552	-0.340416	-0.312111	0.364954	-0.141659	-0.0368757	-0.265403	-0.211432	-0.037438	-0.226458	0.0591181	-0.0213401	-0.273368	-0.130673	-0.483174	-0.211806	-0.0967062
1697				4	-0.272433	-1.09515	-0.515613	-0.349824	-0.460121	-0.218953	-0.39764	-0.071191	-0.269643	-0.172595	0.0204684	0.2152	-0.213689	-0.33056	-0.324939	0.118665	-0.53508	-2.93861	-0.246536	-0.307891	-0.427767	-0.331102	-0.20095	-0.291529	0.0967117	0.0662147	-0.164363	-0.137916	-0.368779	-0.170539	-0.102436
1697				5	-0.250611	0.140581	-0.617744	-0.558335	-0.19378	-0.345831	-0.392614	-0.366207	-0.170157	-0.102261	0.280859	0.0866524	-0.089761	-0.213084	-0.475744	-0.0453384	-0.312935	-3.32266	-0.226926	-0.0677538	-0.591	-0.418766	-0.20456	-0.166544	0.106315	0.0239743	-0.304864	-0.291095	-0.436796	-0.139348	-0.217248
1697				6	-0.364645	-0.903609	-0.508029	-0.303357	-0.366081	-0.392557	-0.53079	-0.323153	-0.400767	-0.144658	-0.321772	-0.171574	-0.238916	-0.200927	-0.39296	0.0342609	-0.302431	-1.72174	-0.199068	-0.0136237	-0.289261	-0.194787	-0.159816	-0.0686704	-0.0895986	-0.0859169	-0.00879631	-0.137438	-0.493789	0.0579649	-0.219558
1697				7	-0.27705	-0.624119	-0.387658	-0.287466	-0.297099	-0.336946	-0.50386	-0.49558	-0.165499	-0.117096	-0.410907	0.155948	-0.22818	-0.191965	-0.381386	0.375468	-0.283731	-2.59905	-0.212615	0.00724379	-0.296358	-0.218328	-0.149863	-0.0401485	-0.0849867	-0.146186	0.147616	-0.0889598	-0.300663	0.113175	-0.176656
1697				8	-0.291164	-1.84284	-0.364128	-0.979534	-1.05204	-0.621564	-0.401953	-0.138912	-0.176996	-0.122953	-0.532792	-0.176035	-0.27133	-0.280533	-0.363214	-0.18822	-0.208329	-2.50215	-0.371083	-0.0532959	-0.506118	-0.2391	-0.174573	-0.196478	-0.205486	-0.181723	0.0593557	-0.104178	0.0289089	0.135794	-0.111092
1697				9	-0.304325	-0.462144	-0.394688	-1.07725	-0.437396	-0.464129	-0.276542	-0.709513	-0.367923	-0.152042	-0.417432	-0.347347	-0.242866	-0.186572	-0.325091	-0.234633	-0.249816	-1.61147	-0.290746	-0.0233155	-0.468037	-0.147952	-0.198841	-0.131432	-0.031741	-0.0517405	0.0588545	-0.000544675	-0.287856	-0.00463816	-0.0291882
1697				10	-0.271429	-0.456721	-0.296991	-0.905714	-0.488702	-0.243883	-0.521182	-0.757488	-0.409317	-0.236653	-0.296764	-0.270456	-0.309029	-0.213547	-0.378374	-0.330422	-0.255011	-0.601333	-0.206978	0.0962982	-0.878916	-0.251717	-0.0515475	-0.147146	-0.0579414	-0.0705445	-0.00192738	-0.0683683	-0.728317	0.0279584	-0.150045
1697				11	-0.426834	-1.25206	-0.475641	-0.730652	-0.62988	-0.3677	-0.640454	-1.22019	-0.353907	-0.347296	-0.0677976	0.201138	-0.333664	-0.17037	-0.26642	0.349459	-0.591054	-0.647101	-0.257513	0.00344321	-0.60567	-0.276521	-0.219822	-0.16309	0.0738927	-0.130214	-0.161013	-0.0289457	-0.529636	-0.217443	-0.168207
1697				12	-0.351444	-0.900052	-0.515594	-0.730305	-0.785263	0.0666889	0.0626842	-0.493178	-0.126485	-0.329187	-0.610842	-0.328797	-0.693837	-0.222592	-0.510763	-0.106932	-0.43784	0.070894	-0.435704	-0.0995682	-0.553807	-0.367863	-0.208494	-0.40501	0.031934	-0.0117741	-0.235197	-0.0259157	-0.513256	-0.194581	-0.222593
1698				1	-0.0872772	-2.9785	-0.429841	-0.885221	-2.06787	-0.137211	-0.530063	-0.501882	-0.282687	-0.354923	-0.660684	-0.372073	-0.71543	-0.147605	-0.339924	-0.100149	-0.529252	0.194988	-0.0357164	-0.0652286	-0.286832	-0.124527	-0.197779	-0.288689	0.0939123	0.0811588	-0.345279	-0.0163701	-0.689063	-0.268775	-0.0804703
1698				2	-0.211426	-2.02518	-0.31953	-0.841727	-1.58684	-0.119588	0.201122	-0.404209	0.278461	-0.169023	-0.522558	-0.229306	-0.333475	-0.215408	-0.410157	0.0269504	-0.531069	-0.152119	-0.358217	0.0274137	-0.122542	-0.106834	-0.0688161	-0.271407	0.0533382	-0.174508	-0.226837	-0.0431389	-0.47905	-0.0398131	-0.0411164
1698				3	-0.148883	0.16649	-0.483464	-0.562428	-0.064181	-0.364588	-0.23704	0.0217644	-0.0889121	-0.00900898	-0.825509	-0.632371	0.475055	-0.235987	-0.472392	-0.418059	0.20953	-0.519706	-0.507872	-0.123302	-0.141929	-0.112751	-0.218428	-0.330885	-0.0275956	-0.114872	-0.0710706	-0.0899679	-0.272358	-0.224267	-0.139725
1698				4	-0.265489	-1.08245	-0.424289	-0.853206	-0.915219	0.066873	-0.525935	-0.121476	-0.207969	-0.298171	-0.367175	-0.335497	-0.516241	-0.288806	-0.394535	-0.177374	-0.563661	-2.52184	-0.324899	-0.112693	-0.333779	-0.198064	-0.24351	-0.236914	-0.0612492	-0.0386809	-0.346429	-0.227151	-0.414506	-0.376289	-0.172653
1698				5	-0.20449	-2.60018	-0.406301	-1.39507	-0.948025	-0.283926	-0.777657	-0.216119	-0.226525	-0.245276	-0.0750106	-0.241246	-0.203834	-0.231398	-0.214494	-0.378152	-0.318882	-1.46414	-0.372393	-0.317307	-0.314017	-0.164843	-0.187291	-0.188982	-0.165076	-0.000568549	-0.184726	-0.109161	-0.394274	-0.156795	-0.075706
1698				6	-0.228883	-1.46311	-0.450461	-0.565152	-0.485398	-0.159059	-0.603847	-0.0844884	0.0244912	-0.0748969	0.0237136	0.123009	-0.254112	-0.25238	-0.0829646	0.161269	-0.361326	0.374463	-0.143655	0.0596595	-0.262659	-0.200825	-0.230127	-0.0655385	0.0436116	-0.117651	-0.201627	-0.0986554	-0.490815	-0.260206	-0.180955
1698				7	-0.241638	-1.46957	-0.465884	-0.938677	-0.830501	-0.262809	-0.647697	-0.244468	-0.116018	-0.239655	-0.847384	-0.482258	-0.568051	-0.26157	-0.267189	-0.415015	-0.420122	-1.18269	0.060075	0.109455	-0.425871	-0.234571	-0.153996	-0.14407	0.00815582	-0.117241	-0.26084	-0.126329	-0.151107	-0.208601	-0.174525
1698				8	-0.345948	-2.17346	-0.456066	-0.604163	-0.989899	-0.242675	-0.709696	-0.332812	-0.278648	-0.305023	-0.417228	-0.189085	-0.297676	-0.325834	-0.371299	-0.0133109	-0.428549	-0.0849203	-0.427566	-0.106915	-0.215822	-0.113215	-0.194856	-0.247162	-0.0833996	-0.0537907	-0.142285	-0.0901667	-0.0284766	-0.245756	-0.132237
1698				9	-0.360937	-1.04343	-0.362701	-0.575501	-0.518687	-0.331922	-0.631109	-0.442111	-0.340888	-0.322452	-0.456408	-0.507547	-0.442556	-0.158093	-0.183871	-0.420126	-0.421433	-0.18551	-0.241329	0.0366707	-0.503476	-0.114173	-0.166155	-0.0998408	-0.103531	-0.0868405	0.079574	-0.0676681	-0.157117	-0.17275	-0.168375
1698				10	-0.398983	-0.855707	-0.336687	-1.25942	-0.819354	-0.108877	-0.261147	-0.861868	-0.199879	-0.255232	-0.340971	-0.278971	-0.0887513	-0.246222	-0.16202	-0.330223	-0.297297	-0.284529	-0.38199	-0.122692	-0.444632	-0.0881623	-0.145072	-0.0220336	-0.0791512	-0.127725	0.161361	0.0497824	-0.12005	-0.167169	0.0372392
1698				11	-0.275694	-1.5354	-0.369888	-1.05784	-1.12688	-0.3213	-0.351971	-1.80178	-0.337512	-0.238003	-0.164129	-0.0845898	-0.302973	-0.171499	-0.185005	0.122379	-0.389613	-0.431192	-0.373489	0.0320115	-0.779828	-0.194599	-0.15116	-0.279327	-0.0361051	-0.185506	-0.173744	0.0675662	-0.15661	-0.257326	-0.141914
1698				12	-0.443342	-0.134916	-0.456253	-0.298872	-0.182529	-0.0553951	-0.59485	-0.403906	-0.0181078	-0.341913	-0.770528	-0.720468	-0.730542	-0.136391	-0.433191	-0.585539	-0.219277	0.226884	-0.188087	0.0473415	-0.710463	-0.36598	-0.216461	-0.449701	-0.0306136	-0.057252	-0.439195	-0.0247941	-0.23173	-0.449197	-0.117651
1699				1	-0.0683773	1.4314	-0.323296	-0.603908	0.419766	-0.428585	-0.115639	0.0802132	0.175269	-0.438676	-0.507825	-0.351603	-0.492689	-0.21194	-0.352377	-0.0685963	-0.500633	-0.937016	-0.118753	0.0170525	-0.327109	-0.213531	-0.211707	-0.262248	0.0548784	-0.0658892	-0.137103	-0.0481885	-0.277926	-0.359495	-0.0810464
1699				2	-0.207108	0.625711	-0.43689	-0.51313	0.420198	0.183008	-1.02469	-0.373378	0.243	-0.144443	-0.361584	-0.0253026	-0.331221	-0.241885	-0.296769	0.119799	-0.490005	-0.27546	-0.558187	-0.839719	-0.366828	-0.083843	-0.303721	-0.335799	-0.187064	-0.645071	-0.020307	-0.0173745	-0.0486113	-0.231734	-0.110908
1699				3	-0.410337	0.0718133	-0.481083	-0.710981	0.0705131	-0.257495	-0.782817	-0.541502	0.112912	-0.120789	-0.598423	-0.388647	0.313769	-0.255272	-0.252891	-0.568142	-0.123201	-0.0875684	-0.196543	-0.157258	-0.409093	-0.167832	-0.274321	-0.402443	0.0230998	-0.0290038	-0.0654039	-0.0505106	-0.183844	-0.10587	-0.212086
1699				4	-0.323609	-1.2369	-0.507248	-1.01869	-0.722673	0.141967	-0.324622	-0.0267295	0.428599	0.110622	-0.142117	-0.0514274	-0.114109	-0.307786	-0.364212	0.0265302	-0.118221	-1.77735	-0.269878	-0.112057	-0.555142	-0.248264	-0.147096	-0.395522	0.0225044	-0.123413	-0.207376	-0.248443	-0.198199	-0.174823	-0.234747
1699				5	-0.304654	-1.13928	-0.380222	-0.195359	-0.361705	-0.412044	-0.427355	-0.323667	0.0762681	-0.186493	-0.275396	0.0143401	-0.340213	-0.227366	-0.0555223	0.0313342	-0.229767	-1.32013	-0.434992	-0.411391	-0.496825	-0.221953	-0.138324	-0.28496	0.0584599	-0.171482	-0.158917	-0.239267	-0.358313	-0.120038	-0.191122
1699				6	-0.383434	-0.916446	-0.465884	-0.388085	-0.447994	-0.267496	-0.420835	-0.117201	0.417386	-0.136497	0.0499206	0.282309	-0.0477692	-0.180843	-0.064387	0.373462	-0.262933	-2.18728	-0.0881893	-0.163992	-0.233084	-0.151188	-0.169351	-0.156967	-0.0246791	-0.0987457	-0.187355	-0.151958	-0.236922	-0.11325	-0.0715937
1699				7	-0.317608	-0.328085	-0.505445	-0.578374	-0.281395	-0.315923	-0.589069	-0.231833	0.486399	-0.22686	-0.740058	-0.310559	-0.408392	-0.177587	-0.237961	-0.288088	-0.347905	-2.23335	-0.308831	-0.14548	-0.110008	-0.119123	-0.183793	-0.125359	-0.173294	-0.227413	-0.00362867	-0.0916072	-0.0587028	0.117884	-0.0617969
1699				8	-0.312505	-1.24618	-0.440182	-0.802955	-0.720422	-0.539453	-0.737805	-0.29138	0.313864	-0.142891	-0.441821	0.00916634	-0.23917	-0.312332	-0.279628	0.132435	-0.331381	-2.73288	-0.367386	-0.185285	-0.507339	-0.188971	-0.228204	-0.12565	-0.0413769	-0.145801	-0.104449	-0.113494	-0.146108	-0.0807134	-0.23239
1699				9	-0.446711	0.0600211	-0.405703	-0.58548	-0.149848	-0.370247	-0.408417	-0.532498	-0.103137	-0.179933	-0.0995605	-0.0208105	-0.272155	-0.247254	-0.311271	-0.072863	-0.330344	-0.702636	-0.335846	-0.330549	-0.467156	-0.00425453	-0.216629	-0.24923	-0.00071516	-0.108613	-0.0289827	0.0811146	0.0256645	-0.127462	-0.0573121
1699				10	-0.261107	7.63257e-05	-0.346862	-0.5589	-0.10349	-0.316775	-0.500073	0.0154955	-0.233502	-0.212752	-0.316138	-0.112867	-0.309329	-0.174845	-0.262672	-0.156914	-0.149121	-0.516078	-0.0740604	-0.0668964	-0.689217	-0.0432004	-0.113586	-0.0904655	-0.143293	-0.19116	0.15577	0.0213401	0.313309	0.0653234	-0.0726145
1699				11	-0.243071	0.0756617	-0.394926	-0.677403	0.0159075	-0.374417	-0.479903	0.0338218	-0.101102	-0.22921	-0.363962	-0.0153514	-0.2545	-0.131399	-0.162643	-0.0867453	-0.352479	-0.779032	-0.142223	-0.223761	-0.493584	-0.0210719	-0.239418	-0.0735949	-0.0746955	-0.180696	-0.0776292	0.0686743	0.133656	-0.0506874	-0.117697
1699				12	-0.428821	1.09482	-0.470697	-0.653603	0.802438	-0.115805	-0.810517	0.282791	0.23812	-0.352156	-0.356645	0.0212439	-0.328248	-0.185271	-0.313442	0.211315	-0.391185	0.353289	-0.299163	-0.0931777	-0.396155	-0.0626241	-0.285507	-0.283899	-0.0746372	-0.273359	-0.293138	0.135038	-0.122555	0.00133762	-0.177713
1700	A-Pre-ref			1	-0.00952797	0.242519	-0.256589	0.155259	0.194196	-0.231233	-1.29257	0.261701	0.440933	-0.149433	-0.55297	-0.591458	-0.611824	-0.125474	-0.248058	-0.137475	-0.27261	-1.29801	0.125741	-0.831775	-0.275668	-0.0666293	-0.247334	-0.359789	-0.152874	-0.192611	-0.25117	0.008435	0.0475285	-0.00365009	-0.161069
1700	A-Pre-ref			2	-0.253903	-0.319234	-0.169201	-1.00567	-0.608202	0.0532055	0.0076272	0.533081	0.704328	-0.0151988	-0.181854	-0.125919	-0.236358	-0.0780003	-0.229724	-0.0226502	-0.366185	-0.61604	-0.15868	-0.552798	-0.267394	-0.0708349	-0.26834	-0.252763	-0.407443	-0.570431	-0.0412573	0.0523849	0.312999	0.120364	-0.12348
1700	A-Pre-ref			3	-0.211032	-0.0379703	-0.245337	-0.244875	0.167686	-0.166927	-0.54128	0.0216137	0.350961	-0.0225874	-1.28866	-0.489409	-0.909858	-0.159916	-0.274528	-0.0187155	-0.647671	-0.0550195	0.107221	-0.227505	-0.293275	-0.0877021	-0.324343	-0.312731	-0.28039	-0.328676	-0.34599	-0.00590153	-0.0884134	-0.162324	-0.0423849
1700	A-Pre-ref			4	-0.212844	-0.670961	-0.384828	-0.337068	-0.370404	-0.0765829	-0.304849	0.0310872	-0.0617233	0.0752918	-0.801263	-0.224927	-0.684601	-0.192384	-0.276056	-0.316142	-0.323305	-1.07044	-0.236669	-0.233032	-0.384453	-0.259519	-0.256503	-0.300769	-0.249932	-0.322806	-0.326465	-0.152286	-0.14704	-0.0612902	-0.233849
1700	A-Pre-ref			5	-0.312201	0.363359	-0.373249	-0.77161	-0.13807	-0.227183	-0.496285	0.0553046	0.0977372	-0.124916	-1.0335	-0.288345	-0.611787	-0.10203	-0.0921491	-0.253125	-0.419621	-2.13904	-0.270676	-0.490181	-0.213284	-0.16622	-0.13564	-0.109585	-0.184208	-0.3991	-0.239976	-0.135023	-0.0748901	0.0178593	-0.133548
1700	A-Pre-ref			6	-0.28368	-1.04823	-0.408732	-0.467635	-0.453092	-0.213676	-0.483864	-0.400741	0.293191	-0.0408927	0.602212	0.27952	0.0501637	-0.152841	-0.0880248	0.429247	-0.376197	-0.46403	-0.377331	-0.247598	-0.197897	-0.14497	-0.19585	-0.137093	-0.181697	-0.104972	-0.239008	-0.0527112	0.026613	-0.0906748	-0.0448221
1700	A-Pre-ref			7	-0.248039	-1.01683	-0.361343	-0.768955	-0.582713	-0.296126	-0.53247	-0.343861	0.482056	-0.218583	0.224639	0.353328	-0.0358775	-0.27246	0.101223	0.438035	-0.339481	0.0655356	-0.0250671	-0.0515455	-0.0302961	-0.111359	-0.178824	0.271058	-0.248093	-0.152624	-0.103719	0.0250863	-0.00495656	-0.105545	-0.100394
1700	A-Pre-ref			8	-0.299401	-1.7703	-0.346428	-1.4331	-0.970474	-0.18567	-0.560599	-0.154947	0.310862	-0.120788	-0.79357	-0.237938	-0.402291	-0.289116	-0.0544157	0.0710273	-0.344895	-0.694673	-0.122777	-0.106158	-0.0719296	-0.0812245	-0.246034	0.291435	-0.178947	-0.0841677	-0.166638	0.0389265	-0.213527	0.0654772	-0.0492195
1700	A-Pre-ref			9	-0.19327	-0.849613	-0.330757	-0.725667	-0.194576	-0.481808	-0.404365	-0.0555313	-0.137893	-0.300909	-0.608664	-0.13965	-0.433671	-0.223494	-0.0465555	-0.199912	-0.418256	0.210834	-0.241598	-0.351358	-0.369464	-0.121505	-0.263676	0.111598	-0.118689	-0.214776	-0.119307	-0.030635	0.0194809	0.0599046	-0.166088
1700	A-Pre-ref			10	-0.173144	-0.301436	-0.140352	-0.436405	-0.19049	-0.317892	-0.0255934	0.238486	-0.158673	-0.310746	-0.18608	-0.244926	-0.142079	-0.0840778	-0.149044	-0.259306	-0.266371	-0.264861	-0.0263252	-0.205604	-0.0689353	-0.0832051	-0.1308	0.0389252	-0.216225	-0.168605	-0.0289431	0.0148265	-0.0467888	-0.0316615	-0.10162
1700	A-Pre-ref			11	-0.131172	-0.25074	-0.243921	-1.17443	-0.209237	-0.241668	-0.396441	0.61302	-0.0208557	-0.325415	-0.347992	-0.124009	-0.359079	-0.0843489	-0.248475	-0.163317	-0.303563	-0.0298515	-0.283794	-0.14277	-0.156724	-0.0277591	-0.214865	-0.156536	-0.225446	-0.348266	-0.136999	0.0548003	-0.164186	-0.0640312	-0.117174
1700	A-Pre-ref			12	-0.202444	0.917852	-0.199064	-0.496952	0.587615	-0.138217	-0.408282	0.446272	0.265248	-0.41428	-0.25352	0.23626	-0.131098	-0.141204	-0.256866	0.270101	-0.400391	0.411228	-0.158076	-0.15168	-0.342099	-0.289539	-0.152267	-0.263035	-0.159068	-0.288521	-0.346504	-0.0754361	0.0375708	-0.114204	-0.0803375
1701	A-Pre-ref			1	-0.174928	0.308299	-0.194514	-0.951438	-0.193072	-0.100169	0.462401	0.153279	0.786399	-0.0936235	0.156742	-0.247062	0.102489	-0.157972	-0.138708	-0.184268	-0.250169	-0.0655433	-0.0157618	-0.256467	-0.17364	-0.109556	-0.164037	-0.119195	-0.175335	-0.304913	-0.0664171	-0.0454247	-0.185132	-0.0708632	-0.053941
1701	A-Pre-ref			2	-0.0610849	-0.0666568	-0.198036	-0.860909	-0.240617	-0.00555086	0.226537	0.220722	0.625188	0.0880593	0.139584	0.285853	0.0479081	-0.128459	-0.163869	0.230053	-0.288509	-0.711353	-0.173324	-0.418727	-0.197112	-0.127668	-0.0985765	0.0116377	-0.305047	-0.61679	0.177254	-0.131499	0.0350507	0.205686	-0.0729405
1701	A-Pre-ref			3	-0.0964843	-0.634424	-0.28538	-0.983134	-0.700052	-0.171436	-0.0472351	-0.0348314	-0.0193111	0.131246	-1.22856	-0.566667	-0.505768	-0.159981	-0.160215	-0.317535	-0.187158	-0.755484	0.0454667	-0.170763	-0.316261	-0.24211	-0.178296	-0.19051	-0.182835	-0.333466	-0.396447	-0.222321	-0.251087	-0.0129307	-0.0673368
1701	A-Pre-ref			4	-0.158439	-2.00919	-0.369777	-0.211991	-0.864749	0.12069	-0.393266	-0.192938	-0.0463692	-0.114552	-1.36621	-0.7717	-0.803196	-0.174045	-0.060432	-0.66739	-0.376404	-1.95766	-0.00625191	-0.115909	-0.38411	-0.177991	-0.236741	-0.481067	-0.0554184	-0.31821	-0.0786047	-0.184751	-0.244878	-0.0701937	-0.139177
1701	A-Pre-ref			5	-0.212539	-0.866071	-0.260231	-0.295957	-0.336626	-0.286093	-0.494486	-0.281873	0.0977163	-0.0260106	-0.526326	-0.19615	-0.496824	-0.0967028	-0.243543	0.0556967	-0.261263	-4.23138	-0.166265	-0.200816	-0.435193	-0.239882	-0.135577	-0.413862	-0.0692371	-0.114974	-0.111609	-0.114778	-0.0815772	-0.00895036	-0.0816036
1701	A-Pre-ref			6	-0.219045	-0.748102	-0.241032	-0.812088	-0.476264	-0.194013	-0.448801	0.123454	0.0195512	0.0197782	-0.551777	-0.179791	-0.312219	-0.133138	-0.061259	-0.149229	-0.352544	-1.49961	-0.162099	0.0145269	-0.387791	-0.169533	-0.210948	-0.297062	-0.164562	-0.266443	-0.136974	-0.060579	-0.153374	0.0871721	-0.103311
1701	A-Pre-ref			7	-0.304886	0.674919	-0.414157	-0.425916	-0.0851367	0.185323	-0.331905	-0.361841	0.286108	-0.138049	-0.415507	-0.16738	-0.474997	-0.181528	-0.0674227	-0.0355303	-0.342214	-0.587752	-0.283516	-0.188382	-0.274229	-0.118723	-0.216649	-0.13433	-0.2068	-0.3871	-0.106505	-0.0433074	-0.146759	-0.0893304	-0.0560424
1701	A-Pre-ref			8	-0.185615	-0.499462	-0.26643	-0.890592	-0.435313	-0.299838	-0.344849	-0.0761342	0.341763	-0.169445	-0.441092	-0.0832142	-0.394215	-0.18305	-0.094697	-0.015244	-0.220083	-1.11489	-0.281497	-0.2059	-0.304691	-0.0598012	-0.214511	-0.190164	-0.167478	-0.109726	-0.287421	-0.0367685	-0.272578	0.0226382	-0.157626
1701	A-Pre-ref			9	-0.131876	0.630001	-0.21813	-0.331477	0.182267	-0.174567	-0.211223	-0.0235753	-0.0379405	-0.260769	-0.255624	-0.32435	-0.251643	-0.107266	-0.198497	-0.350862	-0.339406	-0.376151	-0.288519	-0.0655003	-0.524295	-0.037326	-0.199972	-0.048556	-0.155941	-0.185043	-0.0892931	-0.0103084	-0.00163727	0.00982908	-0.0915051
1701	A-Pre-ref			10	-0.172169	-0.601292	-0.203115	-0.962233	-0.499874	-0.156542	-0.139283	-0.172219	-0.0494503	-0.245421	-0.0132334	-0.279052	-0.150244	-0.0599823	-0.158504	-0.241398	-0.251986	-0.434842	-0.329649	-0.345061	-0.334236	-0.0848759	-0.193378	-0.105101	-0.123867	-0.258379	0.127372	-0.0621885	-0.112877	0.194481	-0.0669306
1701	A-Pre-ref			11	-0.136067	0.241574	-0.271214	-0.605477	-0.0142763	-0.419963	0.0102	0.0333998	-0.0163925	-0.208616	-0.123006	0.0712671	-0.243885	-0.106014	-0.0999693	0.154043	-0.285639	-0.346853	-0.0879876	-0.170454	-0.313889	-0.162431	-0.11723	-0.173197	-0.0269384	-0.188721	-0.0771886	-0.0320108	-0.168014	-0.141636	-0.110706
1701	A-Pre-ref			12	-0.232885	0.615839	-0.21332	-0.053791	0.665833	-0.335678	-0.207754	0.407146	0.138108	-0.269941	-0.355453	-0.227764	-0.257421	-0.0608051	-0.185405	-0.120374	-0.262233	-0.681564	-0.331353	0.06205	-0.193684	-0.183128	-0.288864	-0.218704	-0.0677764	-0.1487	-0.188091	-0.00458387	-0.426695	-0.245307	-0.0986423
1702	A-Pre-ref			1	-0.0444801	1.92658	-0.211386	-0.952679	0.455705	-0.126723	0.549571	0.218937	0.0730508	-0.15229	0.0101352	0.0262572	0.11957	-0.0775101	-0.131086	0.104256	-0.274836	-0.838728	0.0444227	-0.080702	-0.113992	-0.0740451	-0.138814	-0.12102	-0.0920905	-0.313854	-0.110788	-0.00237586	-0.362391	-0.203164	-0.0583375
1702	A-Pre-ref			2	0.0516623	2.84315	-0.246738	-0.673117	1.40402	-0.635809	0.730532	-0.0178094	0.0379386	-0.146804	-0.613739	-0.299386	-0.4208	-0.0318635	-0.240466	-0.0210557	-0.280675	-0.711095	-0.274358	-0.412294	-0.256569	-0.186943	-0.146235	-0.272109	-0.10411	-0.33776	0.037438	-0.0808053	-0.214739	-0.098115	-0.103832
1702	A-Pre-ref			3	-0.199868	2.13042	-0.260006	-0.497315	1.154	-0.595337	-0.355039	-0.206767	0.0179852	0.0476755	-1.3892	-0.683354	-0.878098	-0.0552411	-0.407146	-0.458757	-0.373829	-0.691299	-0.354506	-0.256239	-0.325094	-0.0826228	-0.0663591	-0.283642	-0.0708009	-0.0752179	-0.0771398	0.00804501	-0.143835	-0.0916928	-0.0741251
1702	A-Pre-ref			4	-0.275222	-1.58467	-0.271032	-0.360725	-0.937155	0.0107672	-0.31206	-0.00101939	0.572281	0.212312	-0.806378	-0.266007	-0.53086	-0.161401	-0.321388	-0.140864	-0.14687	-0.142828	-0.113733	0.082994	-0.440878	-0.151996	-0.167392	-0.395724	-0.112662	-0.0957259	-0.134503	-0.16595	-0.378961	-0.000140635	-0.117027
1702	A-Pre-ref			5	-0.236649	-0.729673	-0.382951	-0.376518	-0.369738	0.0229835	-0.542713	0.00860333	0.418822	0.0612182	-0.661592	-0.398641	-0.401977	-0.180615	-0.00628408	-0.490845	-0.137478	-2.61225	-0.299185	-0.158493	-0.594022	-0.246333	-0.153449	-0.364359	-0.212949	-0.247804	-0.287656	-0.254611	-0.148382	-0.048854	-0.0903888
1702	A-Pre-ref			6	-0.190241	-1.19441	-0.374207	-0.558378	-0.577411	-0.0520381	-0.404016	-0.193838	0.333293	-0.092063	-0.405419	-0.125834	-0.352031	-0.102882	-0.102704	0.0844814	-0.271102	-1.387	-0.16837	-0.0670218	-0.344216	-0.160843	-0.208427	-0.206726	0.010706	-0.152581	-0.312149	-0.0769708	-0.047209	-0.0688204	-0.0885786
1702	A-Pre-ref			7	-0.184854	-0.683119	-0.377425	-0.316383	-0.407972	-0.194465	-0.579126	-0.425784	0.599993	-0.105051	-0.422463	-0.232235	-0.360625	-0.0990501	-0.021696	-0.266766	-0.196685	-0.335896	-0.229749	-0.285603	-0.411182	-0.126619	-0.18607	-0.242219	-0.091959	-0.19906	0.0020724	-0.0306311	-0.0937551	-0.0396917	-0.0916393
1702	A-Pre-ref			8	-0.135211	-0.533127	-0.268728	-1.23163	-0.398684	-0.420345	-0.409199	0.0031425	0.460119	-0.0772284	-1.03733	-0.689967	-0.538294	-0.0990716	-0.177367	-0.634772	-0.248637	-0.161149	-0.395965	-0.190583	-0.395994	-0.141672	-0.151082	-0.17802	-0.0995281	-0.261948	-0.0833769	-0.0518728	-0.221817	-0.0782186	-0.1297
1702	A-Pre-ref			9	-0.161181	0.228884	-0.339546	-0.667866	0.0821977	-0.230225	-0.265146	0.165584	-0.0935282	-0.0983486	-0.765038	-0.296173	-0.426664	-0.0223054	-0.0958776	-0.156542	-0.298589	0.419058	-0.342623	-0.291945	-0.586856	-0.226226	-0.230598	-0.113196	-0.0641688	-0.181449	-0.00843487	-0.10995	-0.170859	-0.132795	-0.162935
1702	A-Pre-ref			10	-0.18034	0.385942	-0.217157	-0.696415	0.0777312	-0.371548	-0.259162	-0.85511	-0.189049	-0.241788	-0.0518467	-0.0022438	-0.0809655	-0.0569572	-0.0956706	-0.126809	-0.299109	-0.137107	-0.217461	-0.0255241	-0.49955	0.0165683	-0.139501	-0.0690517	-0.120572	-0.157006	0.0734701	0.0972487	-0.106929	0.171221	-0.0291289
1702	A-Pre-ref			11	-0.131682	-1.00072	-0.241835	-0.3445	-0.682479	-0.27401	-0.606156	-0.765947	0.0738365	-0.188074	0.0326577	0.0508653	0.0150782	-0.0507528	-0.0388788	-0.0137906	-0.143395	-0.771232	-0.163967	0.161555	-0.604745	-0.0607124	-0.151892	-0.309606	-0.198699	-0.136896	-0.0917626	0.0828612	-0.544781	-0.168024	-0.0891149
1702	A-Pre-ref			12	-0.346868	-0.211882	-0.33946	-0.401955	-0.835864	0.120026	0.445897	0.491965	0.0506521	-0.24288	-0.2781	-0.185758	-0.160949	-0.134083	-0.229709	-0.0638451	-0.291184	-0.292615	-0.221149	-0.164493	-0.548476	-0.208862	-0.216075	-0.393667	-0.00471567	-0.0863801	-0.4053	-0.0440202	-0.507959	-0.287136	-0.0796928
1703	A-Pre-ref			1	-0.20897	-1.40046	-0.340077	-0.809422	-1.0775	0.321923	-0.372708	0.10712	0.32257	-0.0879549	-0.557249	-0.233006	-0.504262	-0.157636	-0.179678	0.284761	-0.420156	-0.892093	-0.300599	0.0742691	-0.398852	-0.0704459	-0.161948	-0.163006	-0.138912	-0.312251	-0.37017	-0.121322	-0.311255	-0.27983	-0.0756505
1703	A-Pre-ref			2	-0.0854799	0.704196	-0.302685	-0.3041	0.0209279	-0.479498	0.277445	-0.0946136	0.742687	-0.0194045	-0.3572	-0.115708	-0.0273077	-0.036258	-0.196515	-0.139437	-0.192753	0.0365086	-0.00535552	-0.395238	-0.401759	-0.0330675	-0.0844182	-0.110225	-0.0458954	-0.10606	-0.366029	0.00856927	-0.0110728	-0.131166	0.0604537
1703	A-Pre-ref			3	-0.331731	0.456326	-0.336329	-1.02521	0.346107	0.385216	-0.0722042	-0.718865	0.411614	0.100593	-0.787628	-0.704202	0.191868	-0.0493684	-0.222791	-0.656984	0.200028	-0.217861	0.0601228	-0.288653	-0.321769	-0.128178	-0.0102297	-0.183899	-0.0893308	-0.167088	-0.190265	-0.0944368	-0.160769	-0.0950802	-0.0406263
1703	A-Pre-ref			4	-0.203166	0.188751	-0.262756	-0.591982	0.01106	-0.0689584	-0.195677	-0.351983	0.0838417	0.0740444	-1.14562	-0.626585	-0.619247	-0.186363	-0.228208	-0.558461	-0.128494	-1.98849	-0.0196396	-0.0882029	-0.46044	-0.254531	-0.177036	-0.245295	0.024118	-0.173862	-0.284186	-0.218446	-0.372592	0.0240178	-0.221649
1703	A-Pre-ref			5	-0.299903	-0.320825	-0.348352	0.126044	-0.290304	-0.0755732	-0.204325	0.0267655	-0.162631	-0.0591622	-0.521867	-0.144131	-0.390781	-0.14596	-0.129117	-0.0839774	-0.316636	-3.74479	-0.217011	-0.223883	-0.468032	-0.22629	-0.135371	-0.251705	-0.117173	-0.26727	-0.363437	-0.195648	-0.430424	-0.157916	-0.0851684
1703	A-Pre-ref			6	-0.231836	-1.44976	-0.442153	-0.423836	-0.7181	-0.176583	-0.376417	-0.134665	-0.125802	-0.138558	-0.767127	-0.23109	-0.349325	-0.154967	-0.0867621	-0.309507	-0.237255	-2.38027	-0.235068	-0.225537	-0.185133	-0.115691	-0.231288	-0.215489	-0.110126	-0.183026	-0.273367	-0.10771	-0.0832569	-0.197927	-0.157802
1703	A-Pre-ref			7	-0.197595	-0.417027	-0.375497	0.173386	-0.142196	-0.152256	-0.621909	-0.619977	-0.000629489	-0.270722	-0.202706	-0.30881	-0.0813487	-0.339839	0.0382673	-0.329868	-0.244897	-0.409551	-0.22265	-0.150673	-0.372524	-0.10919	-0.234732	-0.171918	-0.113516	-0.214804	-0.29124	-0.0118914	-0.25376	-0.346357	-0.129058
1703	A-Pre-ref			8	-0.182962	-0.0597518	-0.339926	-0.301767	-0.0219405	-0.292332	-0.272259	-0.142197	-0.156383	-0.0879496	-0.102841	-0.102282	-0.0134853	-0.150412	-0.136687	-0.272557	-0.246517	0.281485	-0.13232	0.0917074	-0.412771	-0.110535	-0.148664	-0.0613516	-0.000401306	-0.0805051	-0.31525	-0.0545031	-0.127675	-0.138756	-0.0861534
1703	A-Pre-ref			9	-0.181986	-1.6811	-0.32954	-0.478829	-0.986224	-0.206247	-0.205269	-0.28865	-0.226242	-0.20356	-0.0989197	-0.255906	0.0589301	-0.103917	-0.206981	-0.28503	-0.182084	-0.273135	-0.204792	-0.0997629	-0.382415	-0.135289	-0.174238	-0.287455	0.0123702	-0.173833	-0.100173	-0.025447	-0.237023	-0.027286	-0.0137253
1703	A-Pre-ref			10	-0.2055	-1.299	-0.336011	-0.515524	-0.875807	-0.0177486	-0.0374629	-0.418209	-0.257817	-0.395836	-0.169814	-0.129975	-0.0284314	-0.141047	-0.174915	-0.00962907	-0.23832	0.0104337	-0.450918	-0.402342	-0.40616	-0.285954	-0.172847	-0.211126	0.155504	-0.117228	-0.0200548	-0.0996545	-0.287571	-0.0839438	-0.0966452
1703	A-Pre-ref			11	-0.128659	0.581205	-0.492716	-0.728615	0.390099	-0.366101	-0.238751	-1.39975	-0.448483	-0.546787	-0.353592	-0.202638	-0.200817	-0.182003	-0.267032	-0.198315	-0.294715	-0.118206	-0.114988	-0.131233	-0.328759	-0.324972	-0.247351	-0.458271	0.117312	0.0560498	-0.188709	-0.149673	-0.100578	-0.200924	0.00336482
1703	A-Pre-ref			12	-0.151169	1.16997	-0.447821	-0.866196	0.854667	-0.0978225	-0.311302	-0.134845	-0.253566	-0.414768	-0.609959	-0.303686	-0.655103	-0.115081	-0.396245	-0.0717139	-0.307999	-1.04026	-0.168984	-0.356758	-0.298077	-0.341141	-0.224964	-0.615232	0.210387	0.054656	-0.260376	-0.00369314	-0.559584	0.0393568	-0.087719
1704	A-Pre-ref			1	0.0283958	-1.97226	-0.280492	0.118034	-1.1509	-0.133281	-0.557774	-0.174736	-0.183579	-0.244678	-0.726517	-0.561933	-0.63935	-0.00454254	-0.335953	-0.128271	-0.349464	-0.528987	-0.0608877	0.141024	0.110923	-0.0388507	-0.122474	-0.225752	0.197489	0.101462	0.0506312	0.0264003	-0.407632	0.095944	-0.0733578
1704	A-Pre-ref			2	-0.0616361	-0.2432	-0.306282	-0.791128	-0.385237	-0.192688	-0.123281	-0.181823	-0.0787645	-0.0810462	-0.410069	-0.0861449	-0.416774	-0.0991433	-0.497912	0.160579	-0.452671	-0.16575	-0.271059	-0.134473	0.186511	-0.105348	-0.150552	-0.268476	0.109216	-0.0321017	0.229563	0.0651508	-0.382098	0.0427579	-0.05994
1704	A-Pre-ref			3	-0.265926	0.0897796	-0.393204	-1.15657	-0.310375	0.220735	0.120854	-0.0277485	0.0433377	-0.0569483	-1.07425	-0.518383	-0.736131	-0.076447	-0.45392	-0.267571	-0.429817	-0.33454	-0.293502	-0.356652	0.00623582	-0.181908	-0.087855	-0.341137	0.0701216	0.0281089	0.0754519	-0.0121786	-0.167839	0.0841495	-0.0538576
1704	A-Pre-ref			4	-0.362647	0.986736	-0.408971	-0.515776	0.108279	0.00927266	0.00439542	-0.297017	0.159514	-0.078204	-0.0051616	-0.068662	-0.0545182	-0.169448	-0.408084	-0.208796	-0.309259	0.184296	-0.339714	-0.123543	-0.291049	-0.287101	-0.242078	-0.462518	0.106294	0.00416292	-0.0710478	-0.173007	-0.328645	0.0168271	-0.0799828
1704	A-Pre-ref			5	-0.318217	0.0565374	-0.402536	-0.603338	-0.0174462	-0.319563	-0.213211	0.0192332	-0.192674	0.0253867	-0.546116	-0.0984357	-0.354799	-0.0856726	-0.283897	0.133419	-0.441637	-2.36033	-0.238036	-0.20069	-0.413426	-0.325156	-0.226846	-0.393765	0.142635	0.114009	-0.225711	-0.261112	-0.507885	-0.164851	-0.143045
1704	A-Pre-ref			6	-0.238434	-0.345813	-0.409401	-0.526436	-0.277256	-0.316656	-0.282303	-0.030514	-0.242004	-0.0952826	-0.637383	-0.158873	-0.253696	-0.0555564	-0.440837	-0.136979	-0.1981	-2.07462	-0.18028	-0.11662	-0.454176	-0.265629	-0.156257	-0.148876	-0.152553	-0.181978	0.061253	-0.11	-0.222181	-0.0203985	-0.0874361
1704	A-Pre-ref			7	-0.181139	-0.0264227	-0.36225	-0.335556	-0.227198	-0.0609679	-0.33389	-0.0634888	-0.169624	-0.121502	-0.135775	-0.286419	-0.146311	-0.175861	-0.249925	-0.355418	-0.177457	0.393823	0.065448	0.0330416	-0.314699	-0.14712	-0.11435	-0.266812	0.0505438	-0.123975	0.0628672	-0.0837699	-0.364909	-0.104538	-0.113085
1704	A-Pre-ref			8	-0.256747	0.132099	-0.455238	-0.476526	-0.102556	-0.292499	-0.173577	0.0707702	-0.0490111	-0.208105	-0.328223	-0.0460743	-0.128168	-0.219259	-0.273337	-0.0318341	-0.26994	-0.33646	-0.0770281	-0.1453	-0.516826	-0.191364	-0.106147	-0.121597	0.0989687	0.0658682	-0.00331599	-0.0784079	-0.322141	-0.0959703	-0.0908722
1704	A-Pre-ref			9	-0.237271	-1.03299	-0.339232	-0.641872	-0.58574	-0.31293	-0.175184	-0.291243	-0.153896	-0.167974	0.128799	-0.0711302	0.0745856	-0.206288	-0.233743	-0.192542	-0.231074	-0.242053	-0.18618	-0.183649	-0.709878	-0.208282	-0.151648	-0.226494	0.0241643	-0.11334	0.00128117	-0.110604	-0.323512	0.113358	-0.100651
1704	A-Pre-ref			10	-0.199551	0.14881	-0.322446	-0.259897	0.0616255	0.0366427	-0.24784	-0.0764464	-0.319508	-0.272408	-0.0407345	-0.139486	0.0705715	-0.106483	-0.0781307	-0.262538	-0.147587	-0.462252	-0.246509	-0.201999	-0.425472	-0.122634	-0.02568	-0.112387	0.011982	-0.0462019	0.129571	0.0418154	-0.55936	0.214415	-0.0660075
1704	A-Pre-ref			11	-0.140593	0.520931	-0.371332	-0.527942	0.164456	-0.395711	0.0251231	-0.936949	-0.445809	-0.128677	-0.188853	-0.187942	-0.0861019	-0.0939333	-0.183561	-0.0664317	-0.324011	-0.304909	-0.0925957	0.0656676	-0.552918	-0.113813	-0.19693	-0.295111	-0.117859	-0.231659	0.0164298	0.0235026	-0.687599	0.164706	-0.0892179
1704	A-Pre-ref			12	-0.115232	0.610316	-0.377661	-0.172678	0.37121	-0.386504	-0.121455	-0.636463	-0.184579	-0.219864	-0.460322	-0.228131	-0.478007	-0.0640704	-0.331375	-0.202135	-0.328217	-0.732451	-0.281613	-0.202089	-0.415902	-0.244211	-0.173973	-0.382206	0.121545	-0.0615493	-0.274288	-0.023417	-0.474421	-0.0600637	-0.0806866
1705	A-Pre-ref			1	-0.0278099	-0.92335	-0.35463	0.104507	-0.0791338	-0.0464904	0.342791	-0.4119	-0.120455	-0.160146	-0.593652	-0.216898	-0.591415	-0.0914738	-0.34235	-0.0552363	-0.52682	0.291158	-0.250263	-0.261668	-0.189	-0.0361174	-0.205802	-0.402846	0.0817529	0.011614	-0.619859	0.0289848	-0.507731	-0.0526213	-0.150378
[truncated: 3,587 more rows]
